# Supplementary material for: β-Cyclocitral Does Not Contribute to Singlet Oxygen-Signalling in Algae, but May Down-Regulate Chlorophyll Synthesis
Source: Plants (Basel). 2022 Aug 19;11(16):2155. doi: 10.3390/plants11162155 (PMC9415740; doi:10.3390/plants11162155)
Supplement: Supplementary file 1 [file plants-11-02155-s001.zip › Supplemental Table S1.xlsx]

## Sheet: RNA seq. beta cyclcocitral
Supplemental Table S1. Transcriptional levels from an RNA seq. analysis of Chlamydomonas reinhardtii treated with 600 ppm β-cyclocitral in comparison to control (mock-treated) identically grown cells. Genes up-regulated (UR) and down-regulared (DR) by Rose Bengal (RB) treatment (>2 FC, P<0.01; see Roach et al., 2018) are indicated in columns 'U' and 'V', respectively, by 'TRUE'.
Genes in grey are P>0.01
Feature identifier	Mean expression level for the specified group	Standard deviation (of the expression) for the specified sample group	Mean expression level for the specified group	Standard deviation (of the expression) for the specified sample group	Expression ratio (fold change) between compared sample groups	Expression ratio (fold change) between the compared sample groups on the 2-logarithmic scale	T-test p value for the comparison between the sample groups	Average ranking value based on both p value and fold change; value 1 is the strongest DE feature															Rose Bengal
ID	AVG β-cyclocitral	SD	AVG control	SD	FC	logFC	P.Value	avgRank	transcriptIDs	geneName	Description									UR_RB	DR_RB		UP-regulated genes	DOWN-regulated genes
Cre06.g300700	0.408839	0.602571	5.81069	5.30287	-13.2482	-3.72773	0.000319782	1	Cre06.g300700.t1.1	NA	PTHR15020//PTHR15020:SF25 - FLAVIN REDUCTASE-RELATED // SUBFAMILY NOT NAMED (1 of 1)									FALSE	TRUE		Cre16.g662450	Cre04.g223300
Cre10.g433250	0.382971	0.556604	3.82013	3.84779	-12.6233	-3.65802	0.00214293	12	Cre10.g433250.t1.2	XUV4	Xanthine/uracil/vitamin C permease-like									FALSE	FALSE		Cre14.g617450	Cre06.g307500
Cre16.g671200	0.0120509	0.0208727	0.58728	0.704528	-10.9892	-3.45801	0.00105171	8	Cre16.g671200.t1.1	NA	NA									FALSE	FALSE		Cre14.g617400	Cre02.g141400
Cre16.g677001	0.0188426	0.0326364	0.527478	0.221895	-10.1458	-3.3428	0.000758237	6	Cre16.g677001.t1.1	NA	PTHR31596:SF1 - T-CELL ACTIVATION INHIBITOR, MITOCHONDRIAL (1 of 1)									FALSE	FALSE		Cre01.g016150	Cre06.g296100
Cre16.g683953	0.0342625	0.0593444	0.394284	0.46775	-9.51643	-3.25042	0.0798746	131	Cre16.g683953.t1.1	NA	PF03110 - SBP domain (SBP) (1 of 24)									FALSE	FALSE		Cre09.g395750	Cre04.g222800
Cre15.g637850	0.03439	0.0303207	0.526524	0.0683578	-9.11212	-3.18779	0.000299474	5	Cre15.g637850.t1.1	NA	PTHR21228 - FAST LEU-RICH DOMAIN-CONTAINING (1 of 85)									FALSE	TRUE		Cre09.g398700	Cre01.g044800
Cre02.g107650	0.0561051	0.0971768	0.666389	0.699669	-9.08982	-3.18425	0.00422338	16	Cre02.g107650.t1.2	NA	NA									FALSE	TRUE		Cre03.g145787	Cre03.g162800
Cre06.g270050	0.218606	0.270976	1.53821	0.33998	-9.0868	-3.18377	0.00228565	14	Cre06.g270050.t1.1	NA	2.7.11.1 - Non-specific serine/threonine protein kinase / Threonine-specific protein kinase (1 of 543)									FALSE	FALSE		Cre08.g381516	Cre08.g367400
Cre17.g701400	0.0526055	0.0455703	0.863303	0.0644664	-8.54433	-3.09497	0.000119398	4	Cre17.g701400.t1.2	NA	PTHR13078:SF22 - MAOC-LIKE DEHYDRATASE DOMAIN-CONTAINING PROTEIN (1 of 14)									TRUE	FALSE		Cre06.g281250	Cre06.g281600
Cre12.g558950	0.0574721	0.0611704	0.612609	0.174607	-8.37382	-3.06589	0.000415935	7	Cre12.g558950.t1.1	NA	PF00505 - HMG (high mobility group) box (HMG_box) (1 of 10)									FALSE	TRUE		Cre12.g503850	Cre07.g353450
Cre09.g399250	16.9595	7.96384	167.333	59.1836	-8.252	-3.04474	1.50909e-07	3	Cre09.g399250.t1.2	KIR1	Ketoacid isomerase-like protein									FALSE	FALSE		Cre12.g517150	Cre06.g278204
Cre06.g278129	0.0831384	0.077577	0.811352	0.48881	-8.12713	-3.02275	0.00110539	13	Cre06.g278129.t1.1	NA	PTHR13068//PTHR13068:SF30 - CGI-12 PROTEIN-RELATED // SUBFAMILY NOT NAMED (1 of 1)									FALSE	TRUE		Cre12.g536650	Cre04.g222750
Cre03.g146567	0.14248	0.178866	1.25396	1.00344	-8.08925	-3.01601	0.0134053	38	Cre03.g146567.t1.1	NA	NA									FALSE	FALSE		Cre02.g093750	Cre03.g177350
Cre10.g455551	0.0225908	0.0391285	0.454702	0.0607866	-7.75009	-2.95421	0.0049704	22	Cre10.g455551.t1.1	NA	NA									FALSE	FALSE		Cre09.g400404	Cre10.g424550
Cre01.g031800	0.176831	0.195141	1.36093	0.952864	-7.68459	-2.94197	0.00521964	23	Cre01.g031800.t1.1	NA	PTHR23083//PTHR23083:SF433 - TETRATRICOPEPTIDE REPEAT PROTEIN, TPR // SUBFAMILY NOT NAMED (1 of 1)									FALSE	TRUE		Cre14.g615600	Cre09.g386119
Cre09.g410100	0.0368322	0.0637953	0.566441	0.54859	-7.62712	-2.93114	0.0132427	39	Cre09.g410100.t1.2	NA	3.6.3.8 - Calcium-transporting ATPase / Calcium-translocating P-type ATPase (1 of 12)									FALSE	TRUE		Cre02.g088950	Cre08.g378300
Cre11.g467661	0.12315	0.115814	1.61381	1.30651	-7.52796	-2.91226	0.00366881	18	Cre11.g467661.t1.1	NA	NA									FALSE	FALSE		Cre10.g443650	Cre16.g695050
Cre12.g510800	1.94975	1.94253	16.4804	11.4959	-7.29749	-2.8674	0.000159519	9	Cre12.g510800.t1.2	CHLI2	Magnesium chelatase subunit I									FALSE	TRUE		Cre08.g380300	Cre14.g626000
Cre05.g239750	0.0570973	0.0988954	0.536858	0.335542	-7.25966	-2.8599	0.0129299	41	Cre05.g239750.t1.2	NA	3.1.6.1 - Arylsulfatase / Sulfatase (1 of 19)									FALSE	TRUE		Cre16.g662500	Cre06.g309000
Cre01.g015350	10.652	8.44106	94.7971	76.8604	-7.14151	-2.83623	0.000185397	11	Cre01.g015350.t1.1	POR1	Light-dependent protochlorophyllide reductase									FALSE	TRUE		Cre01.g036000	Cre06.g271900
Cre11.g467760	1.30582	0.455581	11.5332	5.83781	-7.0629	-2.82026	4.09527e-05	10	Cre11.g467760.t1.1/Cre11.g467760.t2.1	NA	PF10604 - Polyketide cyclase / dehydrase and lipid transport (Polyketide_cyc2) (1 of 2)									FALSE	FALSE		Cre14.g615550	Cre09.g394510
Cre12.g507051	0	0	0.204139	0.226207	-6.91445	-2.78961	0.0138599	44	Cre12.g507051.t1.1	NA	K01193 - beta-fructofuranosidase (E3.2.1.26, sacA) (1 of 2)									FALSE	FALSE		Cre11.g467752	Cre03.g212977
Cre12.g555700	0.313755	0.117291	3.46849	2.05289	-6.78338	-2.76201	0.00775063	33	Cre12.g555700.t1.1	DNJ15	DnaJ-like protein									FALSE	TRUE		Cre02.g089000	Cre13.g568500
Cre04.g214545	0.189019	0.178288	1.33663	0.654618	-6.77282	-2.75976	0.00112229	17	Cre04.g214545.t1.1	NA	NA									FALSE	TRUE		Cre12.g550400	Cre01.g009900
Cre04.g212500	0.0297715	0.0515658	0.837448	0.967703	-6.71698	-2.74781	0.0202621	57	Cre04.g212500.t1.2	CGL42	Predicted protein									FALSE	FALSE		Cre12.g521350	Cre05.g232550
Cre12.g551950	2.07257	2.40956	13.6325	9.0723	-6.69275	-2.7426	0.00157625	21	Cre12.g551950.t1.2	CGL38	Predicted protein									FALSE	FALSE		Cre03.g174450	Cre02.g141946
Cre12.g554150	0.0179989	0.0311749	0.374394	0.265849	-6.66319	-2.73621	0.00867576	35	Cre12.g554150.t1.2	NA	PF12906 - RING-variant domain (RINGv) (1 of 17)									TRUE	FALSE		Cre14.g628702	Cre10.g423200
Cre11.g476500	0.15764	0.190448	1.20399	0.844991	-6.53056	-2.70721	0.00376119	26	Cre11.g476500.t1.1	NA	1.14.12.20 - Pheophorbide a oxygenase / Pheide a oxygenase (1 of 8)									FALSE	FALSE		Cre14.g623650	Cre10.g439700
Cre05.g246800	2.94187	3.33705	18.1477	10.0902	-6.4373	-2.68646	0.000605308	15	Cre05.g246800.t1.2	GUN4	Tetrapyrrole-binding protein									FALSE	FALSE		Cre03.g199200	Cre12.g489900
Cre12.g552006	0.128859	0.150762	1.44049	1.56571	-6.42564	-2.68384	0.031855	73	Cre12.g552006.t1.1/Cre12.g552006.t2.1/Cre12.g552006.t3.1	NA	NA									FALSE	FALSE		Cre10.g417730	Cre09.g407120
Cre02.g085450	2.07012	1.50627	18.2652	15.5611	-6.42287	-2.68322	0.00107808	20	Cre02.g085450.t1.2	CPX1	Coproporphyrinogen III oxidase									FALSE	FALSE		Cre08.g370450	Cre08.g360600
Cre16.g678661	0.354953	0.387691	3.11222	3.28116	-6.40647	-2.67953	0.0218394	59	Cre16.g678661.t1.1	NA	NA									FALSE	FALSE		Cre12.g552700	Cre02.g100450
Cre11.g479950	0.280261	0.187177	2.88956	2.34117	-6.40645	-2.67953	0.0229463	63	Cre11.g479950.t1.2	NA	Triose phosphate transporter									TRUE	FALSE		Cre06.g278245	Cre06.g295450
Cre10.g465375	0	0	0.833038	1.13728	-6.23161	-2.6396	0.0330453	79	Cre10.g465375.t1.1	NA	NA									FALSE	FALSE		Cre04.g211750	Cre01.g054500
Cre03.g159254	5.11627	2.18874	51.7959	49.8511	-6.19908	-2.63205	0.000850907	19	Cre03.g159254.t1.2/Cre03.g159254.t2.1	NA	K03320 - ammonium transporter, Amt family (amt, AMT, MEP) (1 of 8)									FALSE	TRUE		Cre17.g726050	Cre16.g681400
Cre12.g521650	0.0277597	0.024475	0.35348	0.24784	-6.18987	-2.62991	0.00580763	34	Cre12.g521650.t1.2	NA	PTHR22753:SF1 - TRANSMEMBRANE PROTEIN 68 (1 of 3)									FALSE	FALSE		Cre12.g557928	Cre14.g611800
Cre09.g398500	0.298261	0.450446	1.13523	0.347225	-6.15173	-2.62099	0.0115642	45	Cre09.g398500.t1.1	NA	NA									FALSE	FALSE		Cre05.g234661	Cre17.g696850
Cre02.g089274	0.126134	0.0773864	1.31474	1.18957	-6.10335	-2.6096	0.00346751	30	Cre02.g089274.t1.1	NA	PTHR22870:SF175 - ANKYRIN REPEAT AND REGULATOR OF CHROMOSOME CONDENSATION (RCC1) DOMAIN-CONTAINING PROTEIN (1 of 1)									FALSE	FALSE		Cre07.g323500	Cre17.g698400
Cre13.g578050	0.0497143	0.0861076	0.46484	0.161779	-6.05005	-2.59695	0.00562691	36	Cre13.g578050.t1.1	NA	NA									FALSE	FALSE		Cre05.g246300	Cre05.g238650
Cre12.g544450	1.99501	1.35005	14.7837	10.5538	-5.99505	-2.58377	0.00106569	25	Cre12.g544450.t1.2	NA	NA									FALSE	FALSE		Cre02.g095151	Cre11.g467754
Cre09.g405100	0.0541389	0.0475402	0.594328	0.403413	-5.96743	-2.57711	0.0193835	61	Cre09.g405100.t1.1/Cre09.g405100.t2.1	NA	NA									FALSE	FALSE		Cre08.g366400	Cre17.g730100
Cre01.g002203	0	0	0.191723	0.145238	-5.90907	-2.56293	0.0121182	49	Cre01.g002203.t1.1	NA	2.7.11.1 - Non-specific serine/threonine protein kinase / Threonine-specific protein kinase (1 of 543)									FALSE	TRUE		Cre08.g358573	Cre17.g702850
Cre02.g102776	0.0411438	0.0510004	0.317538	0.190927	-5.8728	-2.55405	0.0143992	55	Cre02.g102776.t1.1	NA	NA									FALSE	FALSE		Cre06.g263550	Cre17.g705100
Cre11.g467800	0.0730701	0.0687173	0.611316	0.334039	-5.86509	-2.55215	0.0110585	46	Cre11.g467800.t1.1	NA	PF06545 - Protein of unknown function (DUF1116) (DUF1116) (1 of 1)									FALSE	TRUE		Cre12.g521600	Cre16.g676500
Cre17.g700000	0.585811	0.566785	2.77287	1.26241	-5.82609	-2.54253	0.0201139	68	Cre17.g700000.t1.2	NA	NA									FALSE	TRUE		Cre12.g500100	Cre08.g367500
Cre06.g269100	0.294687	0.365283	1.59463	0.471379	-5.82465	-2.54217	0.0446079	106	Cre06.g269100.t1.1	NA	2.3.1.88 - Peptide alpha-N-acetyltransferase / Protein N-terminal acetyltransferase (1 of 12)									FALSE	FALSE		Cre06.g286550	Cre09.g402293
Cre11.g467850	0.050026	0.0495774	0.514457	0.327106	-5.70186	-2.51143	0.0138997	58	Cre11.g467850.t1.1/Cre11.g467850.t2.1	NA	K13511 - monolysocardiolipin acyltransferase (TAZ) (1 of 2)									FALSE	FALSE		Cre06.g269950	Cre12.g546500
Cre10.g419100	0.167958	0.162287	1.00046	0.343432	-5.68971	-2.50835	0.00410993	37	Cre10.g419100.t1.1	NA	NA									FALSE	FALSE		Cre13.g564900	Cre16.g682800
Cre10.g460050	3.12333	2.85903	21.0963	15.329	-5.67555	-2.50476	0.0010647	29	Cre10.g460050.t1.1/Cre10.g460050.t2.1	NA	PTHR10098//PTHR10098:SF123 - RAPSYN-RELATED // SUBFAMILY NOT NAMED (1 of 1)									FALSE	FALSE		Cre13.g565650	Cre02.g097950
Cre13.g588750	0.0577428	0.0622414	0.538492	0.430111	-5.62127	-2.4909	0.0109571	50	Cre13.g588750.t1.1	NA	PF04577 - Protein of unknown function (DUF563) (DUF563) (1 of 14)									FALSE	TRUE		Cre14.g617200	Cre01.g008550
Cre16.g660390	0.266762	0.200857	1.84532	0.984962	-5.55979	-2.47503	0.00155933	31	Cre16.g660390.t1.1/Cre16.g660390.t2.1	NA	PF00415//PF00685 - Regulator of chromosome condensation (RCC1) repeat (RCC1) // Sulfotransferase domain (Sulfotransfer_1) (1 of 1)									FALSE	TRUE		Cre09.g390800	Cre01.g047650
Cre01.g041900	0.220447	0.220576	0.989202	0.516463	-5.55218	-2.47305	0.029972	84	Cre01.g041900.t1.1	NA	KOG3102 - Uncharacterized conserved protein (1 of 1)									FALSE	FALSE		Cre06.g269300	Cre12.g512950
Cre12.g495100	1.18458	0.73708	8.1412	4.36729	-5.52676	-2.46643	0.0001258	24	Cre12.g495100.t1.2	PSR1	Phosphorus starvation response protein, Myb-like transcriptional regulator									FALSE	FALSE		Cre02.g120100	Cre02.g111200
Cre16.g678551	0.0139271	0.0241224	0.100702	0.0621079	-5.49239	-2.45743	0.0331457	96	Cre16.g678551.t1.1	NA	4.6.1.2 - Guanylate cyclase / Guanylyl cyclase (1 of 72)									FALSE	TRUE		Cre03.g156550	Cre10.g427850
Cre01.g005651	0.149724	0.149812	0.824624	0.321186	-5.49093	-2.45705	0.0113311	53	Cre01.g005651.t1.1	NA	NA									FALSE	FALSE		Cre12.g554200	Cre12.g494650
Cre09.g387356	0.165634	0.155768	0.899648	0.417801	-5.47918	-2.45396	0.0256468	78	Cre09.g387356.t1.1	NA	PTHR12270 - GLYCOSYLTRANSFERASE-RELATED (1 of 10)									FALSE	TRUE		Cre13.g566850	Cre17.g713350
Cre12.g542400	0.0881612	0.0889663	0.752959	0.248247	-5.44371	-2.44459	0.00736619	47	Cre12.g542400.t1.1	NA	PTHR11076//PTHR11076:SF34 - DNA REPAIR POLYMERASE UMUC / TRANSFERASE FAMILY MEMBER // SUBFAMILY NOT NAMED (1 of 1)									FALSE	FALSE		Cre10.g448200	Cre17.g713750
Cre09.g402515	0.668336	0.499999	6.17829	6.72043	-5.40039	-2.43306	0.017127	69	Cre09.g402515.t1.1	AMX1	Copper amine oxidase									FALSE	TRUE		Cre12.g487200	Cre08.g361250
Cre10.g433200	0.469667	0.478696	4.04472	4.72609	-5.38704	-2.42949	0.0526554	123	Cre10.g433200.t1.2	XUV3	Xanthine/uracil/vitamin C permease-like									FALSE	FALSE		Cre06.g283900	Cre17.g738600
Cre12.g540950	0.0512656	0.0482117	0.421239	0.288557	-5.3118	-2.4092	0.0170617	70	Cre12.g540950.t1.1	NA	NA									FALSE	FALSE		Cre15.g640150	Cre02.g114750
Cre17.g697900	0.116406	0.108988	0.872548	0.766876	-5.29097	-2.40353	0.0535501	127	Cre17.g697900.t1.1	NA	NA									FALSE	FALSE		Cre01.g002050	Cre05.g239650
Cre10.g419150	0.803445	0.819668	3.77442	1.09942	-5.22957	-2.38669	0.00250736	42	Cre10.g419150.t1.1	NA	NA									FALSE	TRUE		Cre02.g077350	Cre16.g671800
Cre05.g242000	2.79891	2.53372	15.8193	8.73456	-5.22644	-2.38583	0.000696464	32	Cre05.g242000.t1.2	CHLD	Magnesium chelatase subunit D									FALSE	FALSE		Cre13.g572200	Cre12.g546550
Cre01.g052800	0.0095617	0.0165613	0.122329	0.0477349	-5.18525	-2.37441	0.0428526	116	Cre01.g052800.t1.1/Cre01.g052800.t2.1	NA	K08824 - cyclin-dependent kinase-like [EC:2.7.11.22] (CDKL) (1 of 18)									FALSE	FALSE		Cre06.g278256	Cre05.g247250
Cre17.g720528	0.0861892	0.0308385	0.72908	0.301651	-5.1778	-2.37234	0.0208968	76	Cre17.g720528.t1.2	NA	PTHR12862 - BADF TYPE ATPASE DOMAIN-CONTAINING PROTEIN (1 of 1)									FALSE	FALSE		Cre01.g009550	Cre07.g346850
Cre05.g243600	0.0339425	0.0587902	0.422307	0.0415426	-5.10606	-2.35221	0.0251056	86	Cre05.g243600.t1.2	NA	PTHR32208:SF21 - F10A5.18 (1 of 20)									FALSE	FALSE		Cre12.g559800	Cre16.g655050
Cre16.g674300	0.445399	0.336633	3.04049	2.15577	-5.09633	-2.34946	0.0279446	92	Cre16.g674300.t1.1	FAP269	Flagellar Associated Protein									FALSE	FALSE		Cre06.g293100	Cre07.g332600
Cre03.g183700	0.059711	0.0366168	0.573312	0.624748	-5.08602	-2.34654	0.0195471	75	Cre03.g183700.t1.1	NA	1,3-beta-D-glucan synthase									FALSE	TRUE		Cre06.g256750	Cre16.g685050
Cre09.g388393	0.432813	0.397627	1.97216	1.48946	-5.07945	-2.34467	0.0367639	110	Cre09.g388393.t1.1	ELG13	Exostosin-like glycosyltransferase									FALSE	TRUE		Cre06.g278246	Cre09.g399552
Cre16.g663900	4.51135	4.1177	27.0756	17.6203	-5.0711	-2.3423	0.00401629	48	Cre16.g663900.t1.2	NA	Porphobilinogen deaminase									FALSE	FALSE		Cre12.g524700	Cre16.g687000
Cre13.g571251	0.0457697	0.0792754	0.495681	0.436031	-5.06947	-2.34183	0.0275968	97	Cre13.g571251.t1.1	NA	PTHR21415 - U7 SNRNA-ASSOCIATED SM-LIKE PROTEIN LSM11 (1 of 1)									FALSE	FALSE		Cre11.g468050	Cre09.g407501
Cre12.g492650	0.0602598	0.0562288	0.414039	0.116476	-4.97873	-2.31578	0.0221885	85	Cre12.g492650.t1.2	FAS2	Fasciclin-like protein									TRUE	FALSE		Cre08.g372100	Cre01.g011300
Cre10.g426200	0.0528238	0.0487607	0.380915	0.250611	-4.94742	-2.30668	0.0934099	173	Cre10.g426200.t1.1	NA	RAP-domain containing protein									FALSE	FALSE		Cre15.g636300	Cre10.g447700
Cre07.g325500	12.9276	10.6004	70.6905	41.3132	-4.90803	-2.29514	0.000567137	40	Cre07.g325500.t1.1	CHLH1	Magnesium chelatase subunit H									FALSE	TRUE		Cre12.g537226	Cre02.g088551
Cre03.g194300	0.21543	0.292572	1.08527	0.783835	-4.90298	-2.29366	0.030719	107	Cre03.g194300.t1.2	NA	K18163 - NADH dehydrogenase [ubiquinone] 1 alpha subcomplex assembly factor 6 (NDUFAF6) (1 of 1)									TRUE	FALSE		Cre01.g030100	Cre09.g394900
Cre09.g401700	0.219895	0.0948871	1.87721	1.72211	-4.89358	-2.29089	0.0257363	99	Cre09.g401700.t1.2	NA	PF13414 - TPR repeat (TPR_11) (1 of 60)									TRUE	FALSE		Cre02.g080700	Cre01.g020650
Cre03.g194450	1.05281	1.05131	5.07512	1.13025	-4.83292	-2.2729	0.00436975	56	Cre03.g194450.t1.1	CGL24	Predicted protein									FALSE	FALSE		Cre01.g030850	Cre02.g095650
Cre03.g157800	0.871117	1.06079	3.5933	1.8791	-4.79726	-2.26221	0.00921742	66	Cre03.g157800.t1.1	NA	Thioredoxin-like protein									FALSE	FALSE		Cre10.g458450	Cre03.g202950
Cre03.g152800	0.60749	0.66269	3.79468	3.52545	-4.73483	-2.24331	0.01821	81	Cre03.g152800.t1.2	NA	PTHR10992:SF825 - HYDROLASE, ALPHA/BETA FOLD FAMILY PROTEIN (1 of 1)									FALSE	FALSE		Cre07.g342100	Cre02.g107650
Cre48.g761147	7.45374	5.03197	39.2501	20.8685	-4.72578	-2.24055	0.00901152	67	Cre48.g761147.t1.1	NA	NA									FALSE	TRUE		Cre02.g141950	Cre13.g563700
Cre05.g247200	0.235377	0.308522	1.05901	0.686286	-4.72201	-2.2394	0.0467433	129	Cre05.g247200.t1.2	NA	NA									FALSE	FALSE		Cre12.g498500	Cre04.g223350
Cre03.g155150	0.215536	0.149613	1.15327	0.138762	-4.71014	-2.23577	0.0704365	153	Cre03.g155150.t1.1	NA	PF07173 - Protein of unknown function (DUF1399) (DUF1399) (1 of 10)									FALSE	TRUE		Cre17.g716400	Cre14.g625650
Cre01.g037700	0.569961	0.527577	2.09601	1.19027	-4.6912	-2.22996	0.0305744	109	Cre01.g037700.t1.2	FAD3	Fatty acid desaturase; Linoleate desaturase									FALSE	FALSE		Cre12.g505100	Cre07.g355100
Cre13.g571902	0	0	0.117556	0.130011	-4.69033	-2.22969	0.0989647	186	Cre13.g571902.t1.1	NA	NA									FALSE	FALSE		Cre16.g692800	Cre15.g641650
Cre06.g261550	0.202726	0.268069	0.829758	0.190191	-4.67419	-2.22472	0.115205	202	Cre06.g261550.t1.2	NA	PF06694 - Plant nuclear matrix protein 1 (NMP1) (Plant_NMP1) (1 of 1)									TRUE	FALSE		Cre02.g093800	Cre02.g112300
Cre06.g283950	11.0373	10.1841	63.2487	50.5424	-4.67101	-2.22373	0.00486918	62	Cre06.g283950.t1.2	LHCBM4	Chlorophyll a/b binding protein of LHCII									FALSE	FALSE		Cre10.g424350	Cre16.g676869
Cre17.g733425	0.0228202	0.0226156	0.165053	0.0526982	-4.60096	-2.20194	0.0162295	82	Cre17.g733425.t1.1	NA	NA									TRUE	FALSE		Cre08.g375400	Cre10.g463500
Cre04.g214200	0.144626	0.0549767	0.827735	0.177282	-4.59294	-2.19942	0.00151426	52	Cre04.g214200.t1.1	NA	NA									FALSE	TRUE		Cre10.g448150	Cre08.g360550
Cre09.g396300	3.06702	1.50367	18.0827	10.2513	-4.59252	-2.19929	0.00768328	71	Cre09.g396300.t1.2	PPX1	Protoporphyrinogen oxidase									TRUE	FALSE		Cre03.g200600	Cre10.g466500
Cre17.g698683	0.0668454	0.00831581	0.532512	0.175567	-4.57424	-2.19353	0.0246584	105	Cre17.g698683.t1.2	NA	NA									FALSE	TRUE		Cre09.g409100	Cre17.g743797
Cre06.g255500	0.14832	0.139901	0.788321	0.46331	-4.54392	-2.18394	0.0736681	162	Cre06.g255500.t1.2	NA	PTHR10992:SF743 - ALPHA/BETA-HYDROLASE DOMAIN-CONTAINING PROTEIN (1 of 1)									FALSE	TRUE		Cre01.g001983	Cre09.g394436
Cre04.g214504	0.396603	0.0737767	2.47549	1.38836	-4.53946	-2.18252	0.000723366	51	Cre04.g214504.t1.1	NA	PF00530 - Scavenger receptor cysteine-rich domain (SRCR) (1 of 37)									FALSE	TRUE		Cre12.g549852	Cre08.g375800
Cre06.g278104	0.770859	0.527948	4.1824	1.29659	-4.53787	-2.18202	0.0196179	102	Cre06.g278104.t1.1	NA	NA									FALSE	TRUE		Cre16.g684000	Cre12.g550550
Cre12.g551552	2.89829	2.4389	14.6391	7.0323	-4.53564	-2.18131	0.00378487	64	Cre12.g551552.t1.1	NA	PF12499 - Pherophorin (DUF3707) (1 of 70)									FALSE	FALSE		Cre14.g615618	Cre16.g685000
Cre13.g581700	0.0791341	0.0850066	0.479081	0.347688	-4.53112	-2.17987	0.0527942	140	Cre13.g581700.t1.1	NA	PTHR11258 - 2-5 OLIGOADENYLATE SYNTHETASE (1 of 10)									FALSE	FALSE		Cre02.g101800	Cre02.g120250
Cre03.g168950	0.477636	0.238316	2.85858	0.624442	-4.48064	-2.16371	0.0253341	112	Cre03.g168950.t1.2	NA	NA									FALSE	TRUE		Cre12.g553700	Cre12.g513900
Cre06.g306300	11.3704	9.90714	52.8639	22.9121	-4.47311	-2.16128	0.00183305	60	Cre06.g306300.t1.2	CHLI1	Magnesium chelatase subunit I									FALSE	FALSE		Cre10.g464200	Cre11.g467531
Cre01.g019950	0.395736	0.434848	1.88945	1.23955	-4.46379	-2.15827	0.0339182	126	Cre01.g019950.t1.2	DNJ7	DnaJ-like protein									TRUE	FALSE		Cre16.g663500	Cre16.g692901
Cre13.g582201	0.652737	0.593317	3.82758	2.774	-4.44489	-2.15215	0.0123284	87	Cre13.g582201.t1.1	NA	2.7.6.2 - Thiamine diphosphokinase / Thiamine pyrophosphokinase (1 of 2)									FALSE	FALSE		Cre01.g061807	Cre12.g500150
Cre16.g663876	0.39411	0.350102	2.17775	1.59176	-4.4316	-2.14783	0.029208	120	Cre16.g663876.t1.1	NA	PTHR22870 - REGULATOR OF CHROMOSOME CONDENSATION (1 of 19)									FALSE	FALSE		Cre09.g397512	Cre12.g545850
Cre16.g669400	0.300602	0.246503	1.70375	0.759216	-4.37539	-2.12941	0.0559751	151	Cre16.g669400.t1.2	NA	PTHR14614 - HEPATOCELLULAR CARCINOMA-ASSOCIATED ANTIGEN (1 of 15)									FALSE	FALSE		Cre02.g086850	Cre17.g707350
Cre09.g395176	0.267816	0.286205	1.28152	0.479508	-4.36974	-2.12755	0.0240292	115	Cre09.g395176.t1.1/Cre09.g395176.t2.1	NA	NA									FALSE	TRUE		Cre07.g336650	Cre13.g579326
Cre02.g083550	0.126715	0.051403	0.964842	0.734055	-4.3686	-2.12717	0.023305	113	Cre02.g083550.t1.1	NA	PF01494//PF05834 - FAD binding domain (FAD_binding_3) // Lycopene cyclase protein (Lycopene_cycl) (1 of 1)									FALSE	FALSE		Cre09.g386750	Cre03.g144607
Cre03.g199535	8.36714	5.44478	45.8409	26.0795	-4.3676	-2.12684	0.00163624	65	Cre03.g199535.t1.1	NA	Low molecular mass early light-induced protein									FALSE	FALSE		Cre12.g503800	Cre14.g609350
Cre05.g238600	0.0414538	0.0718	0.336167	0.197595	-4.35714	-2.12338	0.0455693	137	Cre05.g238600.t1.2	NA	PF12499 - Pherophorin (DUF3707) (1 of 70)									FALSE	FALSE		Cre01.g039400	Cre09.g413250
Cre07.g356600	1.33509	0.912204	8.01939	5.71467	-4.3324	-2.11517	0.0118346	88	Cre07.g356600.t1.2	NA	PTHR13096 - MINA53 MYC INDUCED NUCLEAR ANTIGEN (1 of 1)									FALSE	FALSE		Cre12.g525650	Cre09.g396600
Cre01.g023750	0.154845	0.0780633	1.031	0.817304	-4.31428	-2.10912	0.0130306	93	Cre01.g023750.t1.1	NA	NA									FALSE	FALSE		Cre12.g525700	Cre08.g358900
Cre10.g452550	0.018694	0.0323789	0.198094	0.0372925	-4.30515	-2.10606	0.0663947	161	Cre10.g452550.t1.2	NA	PF02301 - HORMA domain (HORMA) (1 of 3)									FALSE	FALSE		Cre09.g394658	Cre02.g095071
Cre01.g046600	0.122699	0.0509675	0.74917	0.376466	-4.28975	-2.10089	0.0284677	121	Cre01.g046600.t1.1	NA	NA									FALSE	FALSE		Cre13.g588650	Cre10.g421300
Cre14.g627150	0.160921	0.0636815	0.920592	0.3042	-4.27543	-2.09607	0.00274562	72	Cre14.g627150.t1.1/Cre14.g627150.t2.1	NA	PF05833 - Fibronectin-binding protein A N-terminus (FbpA) (FbpA) (1 of 1)									FALSE	FALSE		Cre09.g400478	Cre17.g705250
Cre09.g413700	0.704396	0.224324	3.96638	1.56579	-4.26932	-2.09401	0.0122652	94	Cre09.g413700.t1.1	NA	PTHR11132//PTHR11132:SF125 - SOLUTE CARRIER FAMILY 35 // SUBFAMILY NOT NAMED (1 of 3)									FALSE	TRUE		Cre12.g519350	Cre05.g248450
Cre09.g407950	0	0	0.186714	0.0335085	-4.26189	-2.09149	0.0394002	134	Cre09.g407950.t1.2	NA	PTHR13234 - GAMMA-INTERFERON INDUCIBLE LYSOSOMAL THIOL REDUCTASE GILT (1 of 3)									FALSE	FALSE		Cre15.g640250	Cre04.g220750
Cre01.g047850	0.424786	0.330474	2.12614	0.633984	-4.25784	-2.09012	0.0308228	130	Cre01.g047850.t1.2	NA	PTHR11751//PTHR11751:SF388 - SUBGROUP I AMINOTRANSFERASE RELATED // SUBFAMILY NOT NAMED (1 of 2)									FALSE	FALSE		Cre12.g533750	Cre02.g095600
Cre08.g358577	0.179361	0.101851	1.20065	0.948928	-4.25317	-2.08854	0.0476103	142	Cre08.g358577.t1.1	NA	PF00023 - Ankyrin repeat (Ank) (1 of 7)									TRUE	FALSE		Cre01.g013200	Cre01.g034200
Cre12.g500200	0.807117	0.677636	4.35019	2.97163	-4.24162	-2.08461	0.0268598	122	Cre12.g500200.t1.1	MPA2	Metallophosphoesterase/metallo-dependent phosphatase									FALSE	FALSE		Cre01.g039350	Cre16.g659150
Cre06.g278224	0.307485	0.217394	1.80751	1.04778	-4.2356	-2.08257	0.0109964	89	Cre06.g278224.t1.1	MRPL16	Putative mitochondrial ribosomal protein L16, imported to mitochondria									FALSE	FALSE		Cre16.g663950	Cre02.g097213
Cre11.g477350	0.497099	0.2098	2.88569	1.17876	-4.21397	-2.07518	0.0100416	90	Cre11.g477350.t1.1	NA	NA									FALSE	FALSE		Cre06.g281200	Cre04.g228800
Cre12.g551352	0.437598	0.610993	2.1507	2.13538	-4.2101	-2.07385	0.0683621	166	Cre12.g551352.t1.1	NA	PTHR10742//PTHR10742:SF288 - AMINE OXIDASE // SUBFAMILY NOT NAMED (1 of 3)									FALSE	FALSE		Cre07.g334400	Cre14.g633789
Cre17.g732200	0.25656	0.274176	1.23356	0.515901	-4.17924	-2.06324	0.0600568	163	Cre17.g732200.t1.2	NA	NA									FALSE	FALSE		Cre12.g557900	Cre09.g411525
Cre02.g141146	0.0877392	0.151969	0.253662	0.0564177	-4.17481	-2.06171	0.133256	259	Cre02.g141146.t1.1	NA	NA									FALSE	FALSE		Cre16.g689550	Cre05.g236850
Cre01.g034050	1.11687	0.521904	6.12149	3.36815	-4.12639	-2.04488	0.00945507	98	Cre01.g034050.t1.2	NA	PTHR11751:SF428 - PROTEIN NKAT-1-RELATED (1 of 1)									FALSE	FALSE		Cre06.g261500	Cre11.g469650
Cre03.g145867	0.379921	0.468971	1.61616	1.2501	-4.1091	-2.03882	0.0322519	136	Cre03.g145867.t1.1	NA	NA									FALSE	FALSE		Cre14.g619750	Cre02.g091950
Cre09.g404503	0	0	0.139693	0.0514894	-4.10341	-2.03682	0.0566151	164	Cre09.g404503.t1.1/Cre09.g404503.t2.1	NA	2.7.7.49//2.7.7.7//3.1.26.4 - RNA-directed DNA polymerase / Revertase // DNA-directed DNA polymerase / DNA-dependent DNA polymerase // Ribonuclease H / RNase H (1 of 17)									FALSE	FALSE		Cre04.g226950	Cre03.g193750
Cre03.g152701	0	0	0.165622	0.0610465	-4.10341	-2.03682	0.180257	331	Cre03.g152701.t1.1	NA	NA									TRUE	FALSE		Cre12.g500500	Cre02.g103750
Cre04.g224826	0.348553	0.26078	1.45358	0.555768	-4.09981	-2.03556	0.0377587	139	Cre04.g224826.t1.1	NA	NA									TRUE	FALSE		Cre09.g391134	Cre02.g110150
Cre06.g278167	0.382175	0.257158	1.7214	0.486117	-4.07236	-2.02587	0.0727416	180	Cre06.g278167.t1.1	NA	PTHR21037 - SIMILAR TO MITOCHONDRIAL RIBOSOMAL PROTEIN L14 (1 of 1)									FALSE	FALSE		Cre07.g355800	Cre06.g288950
Cre02.g081850	0.0251206	0.0435101	0.351993	0.266649	-4.04665	-2.01673	0.0813807	191	Cre02.g081850.t1.1	NA	PF04577 - Protein of unknown function (DUF563) (DUF563) (1 of 14)									FALSE	TRUE		Cre10.g444550	Cre12.g518350
Cre09.g399100	0.423529	0.238911	2.08426	0.721726	-4.04315	-2.01548	0.00286085	83	Cre09.g399100.t1.1	NA	NA									FALSE	FALSE		Cre06.g309100	Cre03.g144987
Cre14.g612426	0.123285	0.213536	0.540217	0.152243	-4.03546	-2.01273	0.183385	337	Cre14.g612426.t1.1	NA	NA									FALSE	FALSE		Cre12.g503950	Cre16.g695850
Cre12.g502450	0.405595	0.235678	2.78022	2.65066	-4.03248	-2.01167	0.0581605	167	Cre12.g502450.t1.1	ELG8	Exostosin-like glycosyltransferase									FALSE	TRUE		Cre10.g438783	Cre08.g365632
Cre12.g552300	1.1362	1.01135	5.39633	3.26979	-4.02258	-2.00812	0.00624682	101	Cre12.g552300.t1.2	CTL3	C-type lectin									FALSE	FALSE		Cre08.g364550	Cre03.g171950
Cre06.g262650	0.864401	0.786102	3.75328	1.75863	-3.99993	-1.99998	0.00594682	100	Cre06.g262650.t1.1	NA	PF08373 - RAP domain (RAP) (1 of 30)									FALSE	TRUE		Cre12.g555850	Cre06.g278129
Cre02.g084300	0.998475	0.45833	5.36335	3.1271	-3.99332	-1.99759	0.0151444	118	Cre02.g084300.t1.2	NA	Ubiquinone/menaquinone biosynthesis methyltransferase									FALSE	FALSE		Cre03.g179100	Cre09.g394473
Cre07.g321800	0.191113	0.167819	0.94999	0.424322	-3.98905	-1.99604	0.121005	247	Cre07.g321800.t1.2	NA	NA									FALSE	FALSE		Cre09.g389750	Cre03.g148150
Cre10.g449600	0.0812476	0.0764077	0.409251	0.0305604	-3.98662	-1.99517	0.0573512	170	Cre10.g449600.t1.1	NA	NA									FALSE	FALSE		Cre02.g080600	Cre03.g204577
Cre01.g035850	1.85201	1.29343	8.6713	4.14748	-3.97735	-1.99181	0.00607547	104	Cre01.g035850.t1.2	SEC24B	COP-II coat subunit									TRUE	FALSE		Cre09.g409050	Cre16.g685100
Cre06.g251900	0.713904	0.452259	3.24842	1.81618	-3.95991	-1.98547	0.0407866	146	Cre06.g251900.t1.2	ALB3	Inner membrane ALBINO3-like protein									FALSE	TRUE		Cre16.g651801	Cre10.g423300
Cre12.g515950	0.244259	0.0407286	1.25357	0.298967	-3.95306	-1.98297	0.0269919	135	Cre12.g515950.t1.2	NA	NA									FALSE	TRUE		Cre12.g548550	Cre02.g107550
Cre10.g460150	1.02099	0.962855	4.87071	3.81109	-3.94414	-1.97971	0.0397384	147	Cre10.g460150.t1.2	ERM9	ERD4-related membrane protein									FALSE	TRUE		Cre17.g724350	Cre01.g006900
Cre04.g217923	0	0	0.100444	0.12051	-3.94012	-1.97824	0.18085	341	Cre04.g217923.t1.1	NA	PTHR24362 - SERINE/THREONINE-PROTEIN KINASE NEK (1 of 26)									FALSE	FALSE		Cre07.g338350	Cre10.g463150
Cre13.g590251	0.0164588	0.0285076	0.150918	0.0680777	-3.92803	-1.9738	0.0901845	211	Cre13.g590251.t1.1	NA	PTHR23301 - CHITIN BINDING PERITROPHIN-A (1 of 3)									TRUE	FALSE		Cre12.g507650	Cre03.g152350
Cre06.g265652	0.0315812	0.0315998	0.12929	0.0700838	-3.90351	-1.96477	0.0868413	209	Cre06.g265652.t1.1	NA	PTHR19862:SF14 - WD REPEAT-CONTAINING PROTEIN 48 (1 of 20)									FALSE	FALSE		Cre17.g708300	Cre13.g580450
Cre03.g199300	0.745917	0.858452	2.86935	1.64338	-3.90135	-1.96397	0.0701979	188	Cre03.g199300.t1.2	NA	KOG2936 - Uncharacterized conserved protein (1 of 1)									TRUE	FALSE		Cre14.g616950	Cre03.g198750
Cre03.g183750	1.04627	0.991339	4.00307	0.956503	-3.89352	-1.96107	0.0357622	148	Cre03.g183750.t1.1	NA	PTHR21228 - FAST LEU-RICH DOMAIN-CONTAINING (1 of 85)									FALSE	FALSE		Cre01.g065457	Cre09.g386850
Cre02.g143227	0.0211607	0.0366514	0.381613	0.437991	-3.88923	-1.95948	0.147894	305	Cre02.g143227.t1.1/Cre02.g143227.t2.1/Cre02.g143227.t3.1	NA	NA									FALSE	FALSE		Cre02.g108450	Cre09.g394547
Cre14.g633903	0.290696	0.313343	1.05284	0.484775	-3.88205	-1.95682	0.132654	287	Cre14.g633903.t1.2	NA	NA									FALSE	FALSE		Cre03.g178450	Cre01.g030750
Cre09.g398450	0.670688	0.713847	1.95774	1.01453	-3.86396	-1.95008	0.110639	244	Cre09.g398450.t1.1	NA	NA									FALSE	FALSE		Cre01.g035600	Cre17.g736050
Cre08.g367500	0.790067	0.296006	4.38722	2.03606	-3.86386	-1.95004	0.0613019	184	Cre08.g367500.t1.1	LHCSR2	Stress-related chlorophyll a/b binding protein 2									FALSE	TRUE		Cre16.g653400	Cre07.g349119
Cre09.g390875	0.146598	0.0563888	0.888963	0.293087	-3.86038	-1.94874	0.0741555	197	Cre09.g390875.t1.1	NA	NA									FALSE	FALSE		Cre03.g206600	Cre05.g238052
Cre06.g300966	0	0	0.217075	0.224143	-3.85598	-1.9471	0.09752	228	Cre06.g300966.t1.1	NA	NA									FALSE	FALSE		Cre16.g692450	Cre12.g542300
Cre16.g651600	0.0475799	0.0578662	0.199979	0.0937565	-3.85303	-1.94599	0.128309	284	Cre16.g651600.t1.1	NA	NA									FALSE	FALSE		Cre16.g683950	Cre08.g367150
Cre08.g367350	0.475871	0.438355	1.51729	0.57819	-3.84051	-1.9413	0.0989076	233	Cre08.g367350.t1.2	NA	PTHR13271 - UNCHARACTERIZED PUTATIVE METHYLTRANSFERASE (1 of 29)									FALSE	FALSE		Cre14.g615100	Cre07.g334300
Cre15.g640251	0.103622	0.0430431	0.569139	0.209931	-3.83502	-1.93923	0.0377422	156	Cre15.g640251.t1.1	NA	NA									FALSE	FALSE		Cre10.g464850	Cre06.g275000
Cre02.g143607	0.0236739	0.0410044	0.355277	0.410358	-3.82823	-1.93668	0.0837584	213	Cre02.g143607.t1.1	NA	NA									FALSE	TRUE		Cre16.g688550	Cre10.g424775
Cre19.g750347	0	0	0.289863	0.262852	-3.81099	-1.93017	0.142821	306	Cre19.g750347.t1.1	NA	NA									FALSE	FALSE		Cre05.g242350	Cre08.g366700
Cre01.g015600	0.634098	0.486542	3.1899	2.1324	-3.8072	-1.92873	0.0521592	171	Cre01.g015600.t1.1	NA	PTHR23346:SF7 - TRANSLATIONAL ACTIVATOR GCN1 (1 of 1)									FALSE	FALSE		Cre13.g580000	Cre03.g151650
Cre02.g082576	0.474682	0.822173	1.28527	0.931271	-3.80012	-1.92605	0.145437	315	Cre02.g082576.t1.1	NA	NA									FALSE	FALSE		Cre02.g097650	Cre15.g641100
Cre07.g346900	0.337846	0.147973	1.58262	0.25955	-3.79432	-1.92384	0.0535552	175	Cre07.g346900.t1.1	NA	NA									FALSE	FALSE		Cre03.g193250	Cre12.g490750
Cre03.g203451	0.184776	0.185226	0.835511	0.69721	-3.78436	-1.92005	0.0721957	199	Cre03.g203451.t1.1	NA	PTHR12203:SF13 - F10K1.7 PROTEIN (1 of 33)									FALSE	TRUE		Cre06.g272000	Cre01.g050451
Cre16.g674152	0.0978816	0.0555495	0.561135	0.275494	-3.76647	-1.91321	0.0459702	168	Cre16.g674152.t1.1	NA	NA									TRUE	FALSE		Cre10.g453350	Cre16.g680250
Cre10.g464250	0.316641	0.292285	1.45661	0.456486	-3.75678	-1.9095	0.232718	415	Cre10.g464250.t1.2	NA	PF10184 - Uncharacterized conserved protein (DUF2358) (DUF2358) (1 of 8)									FALSE	FALSE		Cre09.g403071	Cre16.g662600
Cre05.g231100	0.115087	0.122493	0.563884	0.314673	-3.73997	-1.90303	0.0850156	221	Cre05.g231100.t1.1	NA	PF00023//PF12796 - Ankyrin repeat (Ank) // Ankyrin repeats (3 copies) (Ank_2) (1 of 2)									FALSE	FALSE		Cre12.g549002	Cre16.g672602
Cre14.g625350	0.179622	0.0223456	1.0055	0.427048	-3.73446	-1.9009	0.105739	249	Cre14.g625350.t1.1	NA	K03327 - multidrug resistance protein, MATE family (TC.MATE, SLC47A, norM, mdtK, dinF) (1 of 11)									FALSE	FALSE		Cre06.g267700	Cre12.g489000
Cre04.g215900	0.0384968	0.0381516	0.227633	0.112818	-3.72385	-1.8968	0.0885782	230	Cre04.g215900.t1.1	NA	PF07699 - GCC2 and GCC3 (GCC2_GCC3) (1 of 8)									FALSE	FALSE		Cre02.g106450	Cre09.g404000
Cre01.g050950	15.8298	7.00226	72.2382	35.0766	-3.718	-1.89453	0.00133261	111	Cre01.g050950.t1.2	NA	1.3.1.83 - Geranylgeranyl diphosphate reductase / Geranylgeranyl reductase (1 of 1)									FALSE	FALSE		Cre09.g400200	Cre12.g507333
Cre06.g259450	0.103577	0.0913209	0.772323	0.598392	-3.71218	-1.89227	0.121074	282	Cre06.g259450.t1.2	NA	NA									FALSE	TRUE		Cre10.g443700	Cre07.g326900
Cre13.g584700	0.278973	0.0731555	1.41825	0.567899	-3.69578	-1.88588	0.0240459	144	Cre13.g584700.t1.1	NA	PTHR12049:SF5 - NADH DEHYDROGENASE [UBIQUINONE] COMPLEX I, ASSEMBLY FACTOR 7 HOMOLOG (1 of 1)									FALSE	FALSE		Cre01.g008150	Cre10.g462150
Cre17.g705316	0	0	0.355684	0.308674	-3.69507	-1.8856	0.125262	291	Cre17.g705316.t1.2	NA	PTHR15535 - TRANSMEMBRANE PROTEIN 2-RELATED (1 of 88)									FALSE	FALSE		Cre04.g216700	Cre12.g534800
Cre08.g382575	0.183141	0.214271	0.728967	0.388555	-3.69247	-1.88459	0.120388	281	Cre08.g382575.t1.1	NA	NA									FALSE	FALSE		Cre02.g088400	Cre16.g652000
Cre02.g145050	0.17014	0.043412	0.937566	0.185417	-3.68645	-1.88223	0.0627834	196	Cre02.g145050.t1.2	CMK1	4-diphosphocytidyl-2-C-methyl-D-erythritol kinase, chloroplast precursor									FALSE	FALSE		Cre06.g263500	Cre03.g205701
Cre13.g575175	0.111045	0.137647	0.62105	0.465339	-3.66094	-1.87221	0.129606	302	Cre13.g575175.t1.1	NA	NA									FALSE	FALSE		Cre03.g159100	Cre03.g187750
Cre17.g744447	0.744036	0.324247	4.17783	3.11755	-3.6474	-1.86687	0.0667755	201	Cre17.g744447.t1.1	NA	3.6.3.7 - Sodium-exporting ATPase / Sodium-translocating P-type ATPase (1 of 1)									TRUE	FALSE		Cre02.g079100	Cre02.g143650
Cre06.g288908	0.0238982	0.0413928	0.140027	0.0927604	-3.64179	-1.86465	0.125101	294	Cre06.g288908.t1.2	NA	PTHR24349:SF79 - NITROGEN NETWORK KINASE 1 (1 of 29)									FALSE	FALSE		Cre10.g459800	Cre16.g684400
Cre03.g199200	0.0572195	0.0502578	0.222254	0.108737	-3.63496	-1.86194	0.0745833	214	Cre03.g199200.t1.1	NA	NA									TRUE	FALSE		Cre14.g619300	Cre02.g143567
Cre14.g627850	1.17382	0.656855	6.16933	4.30627	-3.63206	-1.86079	0.0817445	226	Cre14.g627850.t1.2	NA	1.17.1.8 - 4-hydroxy-tetrahydrodipicolinate reductase / Dihydrodipicolinate reductase (1 of 2)									FALSE	FALSE		Cre06.g305350	Cre08.g364050
Cre12.g556650	0.0807947	0.033561	0.446664	0.242121	-3.62825	-1.85927	0.0719259	212	Cre12.g556650.t1.2	APC4	Anaphase promoting complex subunit 4									FALSE	TRUE		Cre17.g734961	Cre04.g227900
Cre09.g394350	0.641915	0.406963	2.95116	1.77604	-3.62658	-1.85861	0.0153914	141	Cre09.g394350.t1.2	NUP155	Nuclear pore protein									FALSE	FALSE		Cre10.g447800	Cre08.g358350
Cre17.g702451	0.136895	0.23711	0.391164	0.120729	-3.61518	-1.85407	0.116349	286	Cre17.g702451.t1.1	NA	PTHR22884:SF348 - PROTEIN SET-25 (1 of 1)									FALSE	FALSE		Cre17.g731350	Cre05.g244350
Cre16.g667200	0.575901	0.408883	2.22403	0.89679	-3.60713	-1.85085	0.028446	157	Cre16.g667200.t1.2	NA	PTHR14614 - HEPATOCELLULAR CARCINOMA-ASSOCIATED ANTIGEN (1 of 15)									FALSE	FALSE		Cre07.g329700	Cre02.g141886
Cre02.g074650	1.10824	0.733452	4.76349	2.32141	-3.60444	-1.84978	0.0410369	174	Cre02.g074650.t1.2	NA	PTHR23244//PTHR23244:SF315 - KELCH REPEAT DOMAIN // SUBFAMILY NOT NAMED (1 of 1)									TRUE	FALSE		Cre12.g492650	Cre07.g348550
Cre17.g741700	0.17075	0.20214	0.554178	0.142832	-3.60407	-1.84963	0.0476479	185	Cre17.g741700.t1.1	NA	PTHR24115:SF421 - KINESIN-LIKE PROTEIN KIF25 (1 of 1)									FALSE	FALSE		Cre02.g103850	Cre16.g694500
Cre09.g386250	1.61217	0.302565	7.91311	3.98001	-3.60159	-1.84863	0.0494789	187	Cre09.g386250.t1.2	NA	PF08241 - Methyltransferase domain (Methyltransf_11) (1 of 35)									FALSE	TRUE		Cre17.g723100	Cre17.g724750
Cre06.g278110	0.0426306	0.0484128	0.209018	0.112221	-3.57935	-1.8397	0.121957	296	Cre06.g278110.t1.1	NA	PTHR11017 - LEUCINE-RICH REPEAT-CONTAINING PROTEIN (1 of 25)									FALSE	FALSE		Cre10.g425100	Cre06.g306250
Cre03.g167668	0.522311	0.344725	2.15788	0.462137	-3.55182	-1.82856	0.125516	310	Cre03.g167668.t1.1	NA	NA									FALSE	FALSE		Cre07.g346350	Cre03.g202202
Cre13.g582476	0.359214	0.193606	1.61996	0.731261	-3.54693	-1.82657	0.0163588	145	Cre13.g582476.t1.1	NA	K01112 - phosphohistidine phosphatase (PHPT1) (1 of 1)									FALSE	FALSE		Cre12.g519300	Cre17.g741400
Cre17.g705150	0.111855	0.104727	0.407158	0.123048	-3.53189	-1.82044	0.0979393	263	Cre17.g705150.t1.1	NA	PTHR31399:SF0 - DNA-DIRECTED PRIMASE/POLYMERASE PROTEIN (1 of 2)									FALSE	FALSE		Cre16.g692050	Cre11.g481104
Cre03.g153250	0.109981	0.106673	0.432469	0.268572	-3.52581	-1.81796	0.131964	321	Cre03.g153250.t1.1	NA	NA									FALSE	FALSE		Cre01.g011500	Cre09.g398882
Cre07.g326600	0.874443	0.650086	3.36818	1.69672	-3.52393	-1.81718	0.0694234	215	Cre07.g326600.t1.2	NA	K09584 - protein disulfide-isomerase A6 (PDIA6, TXNDC7) (1 of 4)									FALSE	FALSE		Cre15.g636800	Cre02.g096700
Cre13.g564426	0.766618	0.533926	3.39398	2.29466	-3.50002	-1.80736	0.115715	290	Cre13.g564426.t1.1	NA	NA									FALSE	TRUE		Cre08.g360801	Cre17.g699250
Cre14.g634322	1.89712	0.772538	8.88874	5.53309	-3.49869	-1.80682	0.363441	642	Cre14.g634322.t1.1	NA	NA									FALSE	FALSE		Cre17.g701500	Cre16.g666550
Cre02.g108750	0.0248062	0.0429656	0.144649	0.0766508	-3.49598	-1.8057	0.0843613	246	Cre02.g108750.t1.2	NA	PTHR23257//PTHR23257:SF529 - SERINE-THREONINE PROTEIN KINASE // SUBFAMILY NOT NAMED (1 of 6)									TRUE	FALSE		Cre17.g729950	Cre01.g053950
Cre02.g142607	0.0195515	0.00243227	0.121789	0.0897806	-3.49145	-1.80383	0.136661	329	Cre02.g142607.t1.1	NA	3.4.22.68 - Ulp1 peptidase / Ulp1 protease (1 of 6)									FALSE	FALSE		Cre06.g292850	Cre01.g026016
Cre03.g165500	0	0	0.42828	0.346728	-3.48452	-1.80096	0.183507	380	Cre03.g165500.t1.2	NA	NA									FALSE	FALSE		Cre02.g142602	Cre06.g303300
Cre04.g211700	0.0863928	0.0332309	0.465439	0.132691	-3.47984	-1.79902	0.0753803	234	Cre04.g211700.t1.1	NA	PF00651 - BTB/POZ domain (BTB) (1 of 55)									FALSE	TRUE		Cre16.g649250	Cre13.g562800
Cre13.g579734	0.794796	0.304185	3.94634	2.59365	-3.4707	-1.79523	0.0336285	178	Cre13.g579734.t1.1	NA	3.2.1.106 - Mannosyl-oligosaccharide glucosidase / Processing A-glucosidase I (1 of 1)									FALSE	FALSE		Cre02.g088000	Cre15.g637000
Cre06.g278153	0.0144096	0.0249582	0.154756	0.109459	-3.46317	-1.79209	0.120786	308	Cre06.g278153.t1.1	NA	3.4.24.38 - Gametolysin / Lysin (1 of 37)									FALSE	FALSE		Cre06.g305302	Cre14.g617151
Cre13.g581801	0.470837	0.279056	2.22255	1.44704	-3.44842	-1.78594	0.0549062	206	Cre13.g581801.t1.1	NA	PTHR13198 - RING FINGER PROTEIN 25 (1 of 1)									FALSE	FALSE		Cre13.g566900	Cre06.g271450
Cre06.g258500	0.200639	0.123926	1.12816	1.09766	-3.43327	-1.77958	0.087161	257	Cre06.g258500.t1.1	NA	NA									FALSE	FALSE		Cre16.g692350	Cre02.g108100
Cre16.g662650	0.317317	0.20529	1.46327	0.906934	-3.43305	-1.77949	0.0847514	254	Cre16.g662650.t1.1	NA	2.3.1.82 - Aminoglycoside 6-N-acetyltransferase / Kanamycin 6-N-acetyltransferase (1 of 1)									FALSE	FALSE		Cre09.g402450	Cre16.g669525
Cre12.g524650	0.227481	0.132206	1.06014	0.435388	-3.42998	-1.7782	0.0326041	179	Cre12.g524650.t1.2/Cre12.g524650.t2.1	NA	PTHR11085:SF6 - NAD-DEPENDENT PROTEIN DEACETYLASE SIRTUIN-4 (1 of 1)									FALSE	FALSE		Cre16.g676197	Cre17.g745947
Cre13.g566900	0.0604009	0.0206426	0.280627	0.0717352	-3.42988	-1.77816	0.0527175	204	Cre13.g566900.t1.1	NA	PTHR11289 - BREAST CANCER TYPE 2 SUSCEPTIBILITY PROTEIN BRCA2 (1 of 1)									TRUE	FALSE		Cre09.g408600	Cre14.g632860
Cre12.g543900	2.55244	1.61485	10.3243	4.3516	-3.42798	-1.77736	0.0331056	182	Cre12.g543900.t1.1	NA	3.1.3.2//3.1.3.48 - Acid phosphatase / Phosphomonoesterase // Protein-tyrosine-phosphatase / PTPase (1 of 2)									FALSE	TRUE		Cre08.g375450	Cre04.g217947
Cre10.g418550	0.028994	0.050219	0.170187	0.0282283	-3.41967	-1.77386	0.184974	388	Cre10.g418550.t1.2	NA	NA									FALSE	FALSE		Cre12.g517451	Cre08.g360450
Cre07.g341950	0.414202	0.354033	1.51064	0.732372	-3.41609	-1.77235	0.0446597	195	Cre07.g341950.t1.1	NA	NA									FALSE	FALSE		Cre11.g476700	Cre04.g223200
Cre11.g479750	2.42127	1.67008	9.9784	6.22888	-3.41525	-1.77199	0.0197499	165	Cre11.g479750.t1.2	NA	PTHR11564:SF7 - SIGNAL RECOGNITION PARTICLE 54 KDA PROTEIN, CHLOROPLASTIC (1 of 1)									FALSE	FALSE		Cre03.g185850	Cre17.g711550
Cre13.g568200	0.198893	0.138868	0.909085	0.566442	-3.40729	-1.76863	0.0750834	245	Cre13.g568200.t1.1	NA	PTHR10994:SF69 - PROLINE-RICH PROTEIN 18 (1 of 3)									FALSE	TRUE		Cre17.g722200	Cre09.g397586
Cre01.g002100	0.532531	0.630429	1.66348	0.848302	-3.40039	-1.7657	0.0574723	218	Cre01.g002100.t1.2	NA	3.4.19.12 - Ubiquitinyl hydrolase 1 / Ubiquitin thiolesterase (1 of 110)									TRUE	FALSE		Cre02.g095077	Cre02.g107150
Cre02.g095128	0.578672	0.20634	2.62805	1.37179	-3.38241	-1.75805	0.0467784	200	Cre02.g095128.t1.1	NA	NA									FALSE	TRUE		Cre06.g262100	Cre01.g003950
Cre19.g750397	0.170037	0.147297	0.796765	0.731419	-3.37869	-1.75647	0.139182	340	Cre19.g750397.t1.1	NA	3.2.1.17 - Lysozyme / Muramidase (1 of 1)									FALSE	FALSE		Cre11.g468300	Cre09.g399402
Cre01.g044700	0.452874	0.267194	2.81887	2.93455	-3.36725	-1.75157	0.0833853	261	Cre01.g044700.t1.2	NA	PTHR11260//PTHR11260:SF156 - GLUTATHIONE S-TRANSFERASE, GST, SUPERFAMILY, GST DOMAIN CONTAINING // SUBFAMILY NOT NAMED (1 of 1)									FALSE	FALSE		Cre13.g579976	Cre16.g675300
Cre17.g738050	5.59304	1.40477	25.565	14.0501	-3.3645	-1.75039	0.0111933	154	Cre17.g738050.t1.2	AGG4	Flagellar membrane protein, paralog of AGG2									FALSE	TRUE		Cre01.g007300	Cre01.g034500
Cre17.g710850	0.1255	0.0509102	0.646283	0.287167	-3.36325	-1.74986	0.123354	325	Cre17.g710850.t1.2	NA	K15285 - solute carrier family 35, member E3 (SLC35E3) (1 of 4)									FALSE	FALSE		Cre12.g510000	Cre10.g419950
Cre16.g694809	0	0	0.376292	0.341219	-3.36227	-1.74944	0.179091	386	Cre16.g694809.t1.2	NA	NA									FALSE	FALSE		Cre06.g258150	Cre04.g214000
Cre01.g033200	0.357221	0.31509	1.03915	0.48031	-3.34237	-1.74087	0.124662	327	Cre01.g033200.t1.2	NA	NA									FALSE	TRUE		Cre17.g734516	Cre06.g285700
Cre01.g027500	0.678057	0.638147	2.19941	0.554335	-3.33683	-1.73848	0.118517	322	Cre01.g027500.t1.1	NA	PF00622 - SPRY domain (SPRY) (1 of 6)									FALSE	FALSE		Cre16.g680944	Cre08.g358546
Cre03.g209841	0.191097	0.204096	0.755321	0.402603	-3.33388	-1.7372	0.112932	314	Cre03.g209841.t1.1	NA	NA									FALSE	FALSE		Cre03.g185700	Cre12.g506400
Cre03.g156600	5.47577	4.98968	19.8565	9.97081	-3.32372	-1.7328	0.0546539	219	Cre03.g156600.t1.2	NA	PTHR13343:SF14 - GENOMIC DNA, CHROMOSOME 3, P1 CLONE: MXL8 (1 of 1)									TRUE	FALSE		Cre16.g653650	Cre06.g261150
Cre01.g022700	0.849992	0.457176	3.51318	1.63222	-3.32303	-1.7325	0.0688819	242	Cre01.g022700.t1.1	NA	NA									FALSE	TRUE		Cre06.g299700	Cre16.g678200
Cre01.g000800	0.947644	0.47995	3.58174	0.49377	-3.32128	-1.73174	0.0842556	273	Cre01.g000800.t1.2/Cre01.g000800.t2.1	NA	NA									FALSE	FALSE		Cre03.g170350	Cre12.g531000
Cre12.g496350	3.99973	0.881027	15.9698	4.71389	-3.31942	-1.73093	0.00475334	149	Cre12.g496350.t1.2	SSD2	Sterol sensing 5-transmembrane protein									FALSE	FALSE		Cre17.g710150	Cre12.g559555
Cre09.g409100	0.841675	0.265828	3.86786	2.2117	-3.30901	-1.7264	0.0646042	239	Cre09.g409100.t1.2	UPS1	Uroporphyrinogen-III synthase									TRUE	FALSE		Cre17.g732850	Cre16.g683819
Cre07.g354200	0.868348	0.395937	4.66721	4.22239	-3.30835	-1.72611	0.0727732	252	Cre07.g354200.t1.2	GAP2	Glyceraldehyde 3-phosphate dehydrogenase									FALSE	TRUE		Cre06.g298950	Cre01.g032850
Cre04.g214502	2.70973	1.70421	10.6245	6.0457	-3.30357	-1.72402	0.037182	198	Cre04.g214502.t1.1	NA	5.1.3.2 - UDP-glucose 4-epimerase / Uridine diphospho-galactose-4-epimerase (1 of 1)									TRUE	FALSE		Cre17.g741300	Cre18.g749497
Cre03.g193000	0.833134	0.214919	3.92465	2.24921	-3.29147	-1.71873	0.0974587	295	Cre03.g193000.t1.1	NA	PTHR19288//PTHR19288:SF38 - 4-NITROPHENYLPHOSPHATASE-RELATED // SUBFAMILY NOT NAMED (1 of 1)									FALSE	TRUE		Cre02.g119100	Cre02.g087100
Cre01.g005950	2.908	2.07855	11.9445	7.11925	-3.28918	-1.71773	0.0498779	216	Cre01.g005950.t1.2	NA	NA									FALSE	TRUE		Cre05.g232850	Cre03.g202200
Cre16.g672273	0.279345	0.305965	1.00152	0.367736	-3.2874	-1.71695	0.109141	317	Cre16.g672273.t1.1	NA	NA									FALSE	FALSE		Cre17.g728000	Cre01.g003850
Cre02.g085850	0.0804071	0.0335643	0.56609	0.447859	-3.28439	-1.71562	0.151681	368	Cre02.g085850.t1.1	ARS6	Arylsulfatase									FALSE	FALSE		Cre12.g554150	Cre06.g278128
Cre07.g332500	1.39273	0.808437	5.98034	3.51173	-3.27823	-1.71292	0.0556135	235	Cre07.g332500.t1.2	NA	PTHR10994:SF69 - PROLINE-RICH PROTEIN 18 (1 of 3)									FALSE	TRUE		Cre10.g418100	Cre16.g695100
Cre12.g512300	24.7234	9.37699	99.2718	43.0556	-3.27357	-1.71086	0.0142379	172	Cre12.g512300.t1.2	NA	1.13.11.12 - Linoleate 13S-lipoxygenase / Lipoxidase (1 of 1)									FALSE	FALSE		Cre11.g476550	Cre10.g437800
Cre07.g336950	31.0955	20.8202	135.096	110.465	-3.26544	-1.70728	0.0245703	189	Cre07.g336950.t1.1	NA	Starch phosphorylase									FALSE	FALSE		Cre06.g304300	Cre02.g109750
Cre07.g346950	0.17308	0.0909176	0.700194	0.0592956	-3.26191	-1.70572	0.0551832	236	Cre07.g346950.t1.1	NA	NA									FALSE	FALSE		Cre08.g372150	Cre12.g535250
Cre09.g408100	0.680362	0.742183	2.15667	0.686129	-3.25874	-1.70431	0.0804389	278	Cre09.g408100.t1.2	NA	2.1.1.43 - Histone-lysine N-methyltransferase / Protein-lysine N-methyltransferase (1 of 61)									FALSE	TRUE		Cre10.g434850	Cre12.g519950
Cre16.g672250	0.0856976	0.0912123	0.400137	0.28782	-3.25456	-1.70246	0.205078	429	Cre16.g672250.t1.1	NA	3.1.3.26 - 4-phytase / Phytate 6-phosphatase (1 of 3)									FALSE	FALSE		Cre06.g278158	Cre02.g107350
Cre03.g156900	30.8955	21.5512	108.544	58.562	-3.24746	-1.69931	0.0709208	262	Cre03.g156900.t1.2	LHCBM5	Chlorophyll a/b binding protein of LHCII									FALSE	TRUE		Cre24.g755847	Cre10.g443750
Cre16.g673550	0.694842	0.333884	2.97129	1.75259	-3.2453	-1.69835	0.0763729	276	Cre16.g673550.t1.1	NA	5.3.1.23 - S-methyl-5-thioribose-1-phosphate isomerase / S-methyl-5-thio-D-ribose-1-phosphate aldose-ketose-isomerase (1 of 1)									FALSE	FALSE		Cre16.g659350	Cre05.g248400
Cre06.g278288	0.245933	0.219484	1.60225	2.15195	-3.24306	-1.69736	0.35378	660	Cre06.g278288.t1.1	NA	NA									TRUE	FALSE		Cre05.g242178	Cre17.g716350
Cre03.g210737	0.389219	0.136273	1.60138	0.669114	-3.24057	-1.69625	0.0186527	183	Cre03.g210737.t1.1	NA	NA									FALSE	FALSE		Cre17.g726850	Cre09.g386746
Cre02.g076300	1.99263	1.17906	9.58014	8.12224	-3.23299	-1.69287	0.0739586	268	Cre02.g076300.t1.1	UPD2	Uroporphyrinogen decarboxylase									FALSE	FALSE		Cre02.g087950	Cre11.g467660
Cre12.g510050	16.2468	9.72974	58.9417	18.1353	-3.22981	-1.69145	0.00460535	158	Cre12.g510050.t1.2	CTH1	Copper target 1 protein									FALSE	FALSE		Cre06.g269908	Cre17.g705200
Cre07.g320150	2.21186	1.72447	7.88853	4.27174	-3.22757	-1.69045	0.0697529	265	Cre07.g320150.t1.2	NA	DnaJ-like protein, ER-targeted									TRUE	FALSE		Cre06.g280850	Cre17.g707750
Cre12.g533150	2.06741	0.871505	9.48983	4.72991	-3.2265	-1.68997	0.0541455	240	Cre12.g533150.t1.1	NA	PF07452 - CHRD domain (CHRD) (1 of 2)									FALSE	TRUE		Cre02.g075650	Cre17.g716650
Cre07.g333100	0.0858836	0.148755	0.34471	0.24695	-3.22157	-1.68776	0.162209	387	Cre07.g333100.t1.1/Cre07.g333100.t2.1	NA	NA									FALSE	FALSE		Cre09.g401701	Cre12.g557500
Cre10.g447650	0.0468112	0.0810794	0.217965	0.0535033	-3.21938	-1.68679	0.11142	328	Cre10.g447650.t1.2	NA	NA									FALSE	TRUE		Cre16.g679650	Cre06.g278750
Cre11.g467750	0.208003	0.159472	0.779817	0.289303	-3.2105	-1.6828	0.109228	326	Cre11.g467750.t1.1	NA	NA									FALSE	TRUE		Cre16.g664050	Cre09.g395200
Cre10.g431900	0.0534839	0.0471552	0.388859	0.401521	-3.20673	-1.6811	0.133276	355	Cre10.g431900.t1.2	NA	PF12796 - Ankyrin repeats (3 copies) (Ank_2) (1 of 105)									FALSE	FALSE		Cre14.g610647	Cre05.g243801
Cre11.g469750	0.634471	0.0916683	2.92976	1.82648	-3.20573	-1.68065	0.064176	260	Cre11.g469750.t1.1/Cre11.g469750.t2.1	NA	PF07173 - Protein of unknown function (DUF1399) (DUF1399) (1 of 10)									FALSE	FALSE		Cre12.g541100	Cre17.g738900
Cre03.g157000	0.890428	0.321438	3.78037	2.09132	-3.20489	-1.68028	0.0445029	223	Cre03.g157000.t1.1	ELG1	Exostosin-like glycosyltransferase									FALSE	TRUE		Cre06.g292800	Cre03.g206817
Cre14.g620702	134.667	109.246	413.916	145.495	-3.20131	-1.67866	0.0573034	250	Cre14.g620702.t1.1	NA	PF12499 - Pherophorin (DUF3707) (1 of 70)									FALSE	FALSE		Cre10.g449100	Cre01.g028900
Cre12.g496402	0.0362927	0.0628609	0.330046	0.27827	-3.198	-1.67717	0.161238	389	Cre12.g496402.t1.1	NA	NA									FALSE	FALSE		Cre10.g422450	Cre17.g720550
Cre03.g182400	0.494781	0.5018	1.75423	0.913707	-3.19674	-1.6766	0.0703914	272	Cre03.g182400.t1.1	NA	K18932 - palmitoyltransferase (ZDHHC) (1 of 7)									FALSE	FALSE		Cre06.g275650	Cre13.g607550
Cre16.g653250	0.0633922	0.109799	0.353727	0.188544	-3.18893	-1.67307	0.235145	468	Cre16.g653250.t1.1	NA	NA									FALSE	FALSE		Cre17.g727950	Cre04.g223225
Cre08.g362300	1.31893	0.61952	5.42512	2.86499	-3.18873	-1.67298	0.0695123	270	Cre08.g362300.t1.1	NA	NA									TRUE	FALSE		Cre05.g239450	Cre17.g708750
Cre07.g347350	0.178291	0.166365	0.772303	0.304587	-3.18651	-1.67198	0.198055	430	Cre07.g347350.t1.1/Cre07.g347350.t2.1	NA	PTHR15217 - WILMS TUMOR 1-ASSOCIATING PROTEIN (1 of 2)									FALSE	FALSE		Cre06.g291900	Cre01.g003532
Cre12.g526000	0.335309	0.312879	1.08565	0.43484	-3.17669	-1.66752	0.161766	391	Cre12.g526000.t1.1	NA	PTHR12743:SF0 - CYTOCHROME C-TYPE HEME LYASE (1 of 14)									FALSE	FALSE		Cre04.g229494	Cre06.g258700
Cre16.g695250	0.343239	0.345829	1.23698	0.863782	-3.17499	-1.66675	0.19414	421	Cre16.g695250.t1.1	NA	NA									FALSE	FALSE		Cre09.g413533	Cre02.g090000
Cre02.g081900	0.195758	0.0803663	0.922047	0.582539	-3.17499	-1.66675	0.165689	397	Cre02.g081900.t1.2	NA	NA									FALSE	TRUE		Cre14.g625400	Cre16.g655500
Cre07.g314833	0.0678938	0.117596	0.616584	0.577997	-3.17295	-1.66582	0.231889	464	Cre07.g314833.t1.1	NA	NA									TRUE	FALSE		Cre14.g619550	Cre07.g325050
Cre12.g528550	1.24528	0.44422	4.78186	1.00192	-3.16915	-1.6641	0.0173368	192	Cre12.g528550.t1.1	NA	1.3.99.5 - 3-oxo-5-alpha-steroid 4-dehydrogenase (acceptor) / Steroid 5-alpha-reductase (1 of 1)									FALSE	FALSE		Cre12.g487850	Cre02.g142166
Cre09.g386753	1.82243	1.19569	6.18986	2.40327	-3.15933	-1.65962	0.08343	303	Cre09.g386753.t1.1	NA	PF04689 - DNA binding protein S1FA (S1FA) (1 of 1)									FALSE	TRUE		Cre11.g481400	Cre17.g715200
Cre08.g386100	1.529	1.08008	5.83997	3.92927	-3.15886	-1.6594	0.109655	333	Cre08.g386100.t1.1/Cre08.g386100.t2.1/Cre08.g386100.t3.1	NA	2.7.11.18 - [Myosin light-chain] kinase / Smooth-muscle-myosin-light-chain kinase (1 of 15)									FALSE	FALSE		Cre01.g002100	Cre06.g278117
Cre06.g285250	167.175	112.46	579.673	296.432	-3.14851	-1.65467	0.0409334	229	Cre06.g285250.t1.2	LHCBM6	Chloropyll a/b binding protein of LHCII type I, chloroplast precursor									FALSE	TRUE		Cre08.g375150	Cre09.g391370
Cre10.g463300	0.892931	0.617357	3.55631	2.12673	-3.14338	-1.65231	0.0592492	266	Cre10.g463300.t1.2	NA	PTHR31515:SF0 - TRANSMEMBRANE PROTEIN (1 of 1)									FALSE	FALSE		Cre14.g610950	Cre01.g068012
Cre01.g038550	0.388708	0.0632332	1.67527	0.796893	-3.12157	-1.64227	0.0773602	299	Cre01.g038550.t1.1	SQD2	Sulfolipid synthase									TRUE	FALSE		Cre10.g442350	Cre09.g396700
Cre07.g328075	1.05494	0.860415	3.70897	1.96473	-3.10949	-1.63668	0.0990273	330	Cre07.g328075.t1.1/Cre07.g328075.t2.1/Cre07.g328075.t3.1	NA	NA									FALSE	TRUE		Cre03.g150650	Cre16.g648600
Cre10.g449050	1.20672	0.477248	5.0171	2.65316	-3.10884	-1.63638	0.148311	382	Cre10.g449050.t1.2	NA	2.4.1.68 - Glycoprotein 6-alpha-L-fucosyltransferase / Guanosine diphosphofucose-glycoprotein fucosyltransferase (1 of 3)									FALSE	FALSE		Cre05.g239850	Cre06.g275500
Cre08.g367400	1.31084	0.0448051	5.18016	0.934558	-3.10672	-1.63539	0.0901541	323	Cre08.g367400.t1.1	LHCSR3	Stress-related chlorophyll a/b binding protein 3									FALSE	TRUE		Cre16.g684600	Cre12.g487050
Cre16.g693950	0.0599958	0.055381	0.268481	0.195996	-3.10586	-1.63499	0.175544	416	Cre16.g693950.t1.1	NA	PTHR32208:SF21 - F10A5.18 (1 of 20)									FALSE	FALSE		Cre06.g267500	Cre16.g687450
Cre07.g350550	1.25265	0.896933	5.64259	4.79065	-3.10399	-1.63412	0.117833	350	Cre07.g350550.t1.1	NA	PTHR22748:SF4 - DNA-(APURINIC OR APYRIMIDINIC SITE) LYASE 2 (1 of 3)									FALSE	FALSE		Cre04.g217930	Cre15.g641600
Cre03.g196200	0.545005	0.472765	1.30387	0.403829	-3.10063	-1.63256	0.165222	405	Cre03.g196200.t1.1/Cre03.g196200.t2.1	NA	PTHR17630//PTHR17630:SF32 - DIENELACTONE HYDROLASE // SUBFAMILY NOT NAMED (1 of 2)									FALSE	FALSE		Cre16.g651000	Cre03.g143967
Cre07.g321750	2.76585	0.2751	11.2095	5.62247	-3.10055	-1.63252	0.0561935	269	Cre07.g321750.t1.2/Cre07.g321750.t2.1	NA	NA									FALSE	FALSE		Cre14.g627411	Cre06.g278230
Cre03.g151300	0.243562	0.0787964	1.09394	0.716072	-3.09902	-1.63181	0.0628222	283	Cre03.g151300.t1.1/Cre03.g151300.t2.1	NA	PTHR23257//PTHR23257:SF513 - SERINE-THREONINE PROTEIN KINASE // SUBFAMILY NOT NAMED (1 of 40)									FALSE	TRUE		Cre12.g554929	Cre16.g694300
Cre06.g281766	0.0853147	0.0346086	0.359246	0.0734813	-3.09827	-1.63146	0.122913	358	Cre06.g281766.t1.1/Cre06.g281766.t2.1	NA	NA									FALSE	FALSE		Cre09.g391900	Cre02.g090550
Cre05.g241450	3.05528	1.78086	11.1356	4.20878	-3.09312	-1.62906	0.0237914	210	Cre05.g241450.t1.2	FTSY	Chloroplast SRP Receptor									FALSE	FALSE		Cre12.g500450	Cre10.g424700
Cre12.g528500	0.575628	0.135517	2.21943	0.701074	-3.08432	-1.62495	0.0420426	243	Cre12.g528500.t1.2	NA	3.6.1.56 - 2-hydroxy-dATP diphosphatase / Oxidized purine nucleoside triphosphatase (1 of 1)									FALSE	FALSE		Cre02.g091050	Cre06.g278265
Cre12.g538100	3.47205	1.66721	14.5213	9.49281	-3.07108	-1.61874	0.0301887	224	Cre12.g538100.t1.2	NA	K07393 - putative glutathione S-transferase (ECM4) (1 of 3)									FALSE	FALSE		Cre13.g585150	Cre03.g176500
Cre13.g573400	14.9768	10.0019	50.2987	21.8273	-3.06255	-1.61473	0.0506375	258	Cre13.g573400.t1.2	NA	NA									FALSE	FALSE		Cre10.g456750	Cre06.g267400
Cre12.g489001	0.0790013	0.0843754	0.611332	0.676101	-3.06096	-1.61399	0.269182	549	Cre12.g489001.t1.1	NA	NA									FALSE	FALSE		Cre14.g613350	Cre14.g623000
Cre15.g635900	0.244663	0.159295	0.891346	0.248944	-3.05536	-1.61134	0.0785037	316	Cre15.g635900.t1.1	NA	PTHR12393:SF6 - SPHINGOMYELIN PHOSPHODIESTERASE 2 (1 of 100)									FALSE	TRUE		Cre03.g148350	Cre17.g718700
Cre09.g414750	0.0696714	0.0750993	0.262013	0.102242	-3.05518	-1.61126	0.163866	412	Cre09.g414750.t1.1	NA	2.4.2.41 - Xylogalacturonan beta-1,3-xylosyltransferase / Xylogalacturonan xylosyltransferase (1 of 33)									FALSE	TRUE		Cre13.g569400	Cre09.g416309
Cre06.g309000	3.17191	1.28726	14.3956	7.82531	-3.05118	-1.60937	0.151481	396	Cre06.g309000.t1.2	NAR1.2	Anion transporter									FALSE	TRUE		Cre06.g303100	Cre09.g391171
Cre10.g460326	0.4143	0.289265	1.59802	0.595485	-3.04714	-1.60746	0.228439	480	Cre10.g460326.t1.1	NA	NA									TRUE	FALSE		Cre06.g262800	Cre10.g440800
Cre14.g634193	0.0329761	0.0358939	0.126044	0.106271	-3.03985	-1.604	0.238653	508	Cre14.g634193.t1.1	NA	NA									FALSE	TRUE		Cre13.g581450	Cre02.g147050
Cre02.g114950	0.131505	0.14175	0.605494	0.494587	-3.03703	-1.60266	0.279167	573	Cre02.g114950.t1.1	NA	NA									FALSE	FALSE		Cre03.g172350	Cre13.g605900
Cre15.g635350	0.0862948	0.0107354	0.460396	0.365576	-3.037	-1.60265	0.158616	408	Cre15.g635350.t1.2/Cre15.g635350.t2.1/Cre15.g635350.t3.1	NA	K05931 - histone-arginine methyltransferase CARM1 [EC:2.1.1.125] (CARM1, PRMT4) (1 of 1)									FALSE	TRUE		Cre01.g038400	Cre01.g028950
Cre06.g303700	0.745599	0.505765	3.28659	2.4447	-3.03286	-1.60068	0.142149	390	Cre06.g303700.t1.2	NA	NA									FALSE	FALSE		Cre12.g560450	Cre02.g108300
Cre05.g240050	0.441171	0.491386	1.42137	0.918128	-3.03174	-1.60014	0.146431	394	Cre05.g240050.t1.1	NA	PF13813 - Membrane bound O-acyl transferase family (MBOAT_2) (1 of 1)									FALSE	FALSE		Cre10.g422050	Cre13.g604350
Cre06.g258300	0.899886	0.202041	3.75286	2.0695	-3.03044	-1.59953	0.0527134	274	Cre06.g258300.t1.1	NA	NA									FALSE	FALSE		Cre10.g435100	Cre06.g285250
Cre12.g554200	0.780963	0.232585	2.85835	0.609976	-3.02778	-1.59826	0.0265764	227	Cre12.g554200.t1.1	NA	ER-Golgi Qb-SNARE, Memb/GS35/Bos1-family (Qb.II)									TRUE	FALSE		Cre12.g505800	Cre17.g733350
Cre17.g701150	0.226132	0.182232	0.81703	0.458314	-3.02638	-1.5976	0.106741	349	Cre17.g701150.t1.1	NA	NA									FALSE	TRUE		Cre02.g074650	Cre03.g156700
Cre02.g146851	0.0277572	0.0296454	0.120362	0.0992772	-3.02253	-1.59576	0.229671	489	Cre02.g146851.t1.1	NA	KOG0192//KOG0198 - Tyrosine kinase specific for activated (GTP-bound) p21cdc42Hs // MEKK and related serine/threonine protein kinases (1 of 7)									FALSE	FALSE		Cre16.g680230	Cre07.g339000
Cre10.g463968	0.815771	0.743649	4.96433	6.65015	-3.02097	-1.59501	0.265716	553	Cre10.g463968.t1.1	NA	NA									FALSE	FALSE		Cre04.g217900	Cre07.g315500
Cre12.g534980	0.374392	0.14401	1.49393	0.279434	-3.02026	-1.59467	0.130482	381	Cre12.g534980.t1.1/Cre12.g534980.t2.1	NA	PTHR12203:SF13 - F10K1.7 PROTEIN (1 of 33)									TRUE	FALSE		Cre03.g177200	Cre14.g632700
Cre06.g272760	0.470716	0.193831	1.92271	0.826907	-3.01794	-1.59356	0.100808	346	Cre06.g272760.t1.2	NA	NA									FALSE	FALSE		Cre14.g632775	Cre16.g682100
Cre06.g271750	0.148787	0.0185096	0.771308	0.378807	-3.01783	-1.59351	0.167633	418	Cre06.g271750.t1.2/Cre06.g271750.t2.1	NA	NA									FALSE	FALSE		Cre04.g225050	Cre17.g728450
Cre02.g079926	0.0928956	0.0660285	0.422838	0.342472	-3.01423	-1.59179	0.22749	490	Cre02.g079926.t1.1	NA	PF12499 - Pherophorin (DUF3707) (1 of 70)									FALSE	FALSE		Cre08.g373250	Cre12.g493600
Cre07.g331150	0.257724	0.175316	0.78123	0.254356	-3.01358	-1.59148	0.153876	409	Cre07.g331150.t1.2	NA	PF00141//PF07731//PF07732 - Peroxidase (peroxidase) // Multicopper oxidase (Cu-oxidase_2) // Multicopper oxidase (Cu-oxidase_3) (1 of 1)									FALSE	TRUE		Cre04.g216600	Cre07.g353750
Cre05.g244950	5.27811	5.12119	16.5907	8.61811	-3.01204	-1.59074	0.0853692	335	Cre05.g244950.t1.2	NA	K13250 - translocon-associated protein subunit beta (SSR2) (1 of 1)									TRUE	FALSE		Cre13.g590350	Cre09.g402923
Cre17.g727250	0.702863	0.307391	2.77271	1.40924	-3.0114	-1.59043	0.153704	410	Cre17.g727250.t1.1	NA	NA									FALSE	TRUE		Cre13.g565600	Cre12.g557100
Cre06.g258550	0.0681591	0.0635997	0.227479	0.128479	-3.00894	-1.58925	0.238331	525	Cre06.g258550.t1.1	NA	NA									FALSE	FALSE		Cre01.g030550	Cre05.g238200
Cre16.g690509	0.706814	0.436177	3.04383	2.3253	-3.00854	-1.58906	0.136776	392	Cre16.g690509.t1.1	NA	NA									FALSE	FALSE		Cre16.g683400	Cre06.g277300
Cre09.g414850	0.925226	0.533768	3.37076	1.23328	-3.00632	-1.588	0.0436312	267	Cre09.g414850.t1.1/Cre09.g414850.t2.1	NA	PTHR10668//PTHR10668:SF63 - PHYTOENE DEHYDROGENASE // SUBFAMILY NOT NAMED (1 of 2)									FALSE	FALSE		Cre12.g524000	Cre07.g320700
Cre12.g510850	3.48643	2.80214	13.341	8.77953	-3.0054	-1.58756	0.149298	406	Cre12.g510850.t1.2	CGL73	Predicted protein									TRUE	FALSE		Cre10.g465950	Cre08.g370000
Cre04.g229850	0.292135	0.394455	0.628573	0.404094	-2.99715	-1.58359	0.22642	499	Cre04.g229850.t1.2	NA	NA									FALSE	TRUE		Cre10.g427650	Cre06.g294700
Cre07.g320700	0.363806	0.188742	1.44474	0.954713	-2.99474	-1.58243	0.0972407	347	Cre07.g320700.t1.1	CYG11	Adenylate/guanylate cyclase									FALSE	TRUE		Cre26.g756797	Cre17.g740550
Cre10.g444094	1.16952	0.292869	4.34945	0.657423	-2.99336	-1.58177	0.060258	307	Cre10.g444094.t1.1	NA	NA									TRUE	FALSE		Cre11.g475450	Cre04.g214200
Cre06.g282100	0	0	0.197133	0.0763991	-2.98658	-1.57849	0.183052	448	Cre06.g282100.t1.2	NA	NA									TRUE	FALSE		Cre01.g024850	Cre02.g117250
Cre12.g541851	0	0	0.152044	0.0589248	-2.98658	-1.57849	0.213929	484	Cre12.g541851.t1.1	NA	PF02580 - D-Tyr-tRNA(Tyr) deacylase (Tyr_Deacylase) (1 of 2)									FALSE	FALSE		Cre11.g467699	Cre16.g651300
Cre06.g302551	0	0	0.0856139	0.0331797	-2.98658	-1.57849	0.229847	509	Cre06.g302551.t1.1	NA	NA									FALSE	FALSE		Cre01.g009575	Cre14.g624950
Cre13.g580150	0.360519	0.136144	1.45387	0.814179	-2.98499	-1.57773	0.0839908	338	Cre13.g580150.t1.1/Cre13.g580150.t2.1	NA	PTHR23516:SF1 - MOLYBDATE-ANION TRANSPORTER (1 of 2)									FALSE	FALSE		Cre11.g467607	Cre12.g493050
Cre12.g558100	5.5064	4.44317	19.1837	10.1349	-2.98202	-1.57629	0.0597961	309	Cre12.g558100.t1.2	PRM2	Protein-/Histone-arginine N-methyltransferase									FALSE	FALSE		Cre03.g152750	Cre07.g349152
Cre02.g095083	0.340246	0.391679	1.2431	1.0834	-2.97612	-1.57343	0.203774	471	Cre02.g095083.t1.1	NA	NA									FALSE	FALSE		Cre12.g538450	Cre07.g313850
Cre15.g640600	0.395278	0.232894	1.67636	1.14834	-2.97359	-1.57221	0.20199	472	Cre15.g640600.t1.2	NA	PF00775 - Dioxygenase (Dioxygenase_C) (1 of 1)									FALSE	FALSE		Cre08.g374950	Cre17.g729901
Cre14.g623650	0.717144	0.552182	3.05027	2.46755	-2.97142	-1.57115	0.105973	363	Cre14.g623650.t1.2	NA	1.1.1.2 - Alcohol dehydrogenase (NADP(+)) / Aldehyde reductase (NADPH) (1 of 3)									TRUE	FALSE		Cre13.g571500	Cre10.g463026
Cre01.g008750	0.145251	0.0519709	0.613388	0.258595	-2.96266	-1.56689	0.0938645	352	Cre01.g008750.t1.2	NA	NA									FALSE	TRUE		Cre10.g461300	Cre04.g228675
Cre16.g672500	0.245054	0.281818	0.552517	0.192293	-2.96239	-1.56676	0.217123	494	Cre16.g672500.t1.2	NA	PTHR28573:SF1 - SPINDLE AND KINETOCHORE-ASSOCIATED PROTEIN 1 (1 of 1)									FALSE	FALSE		Cre16.g656150	Cre08.g360400
Cre17.g703450	0.0273594	0.0276092	0.127271	0.076323	-2.961	-1.56608	0.221673	505	Cre17.g703450.t1.1	NA	NA									FALSE	TRUE		Cre16.g677000	Cre01.g026050
Cre12.g547400	2.64154	1.08448	9.73145	3.82968	-2.96094	-1.56606	0.0554218	311	Cre12.g547400.t1.1	NA	KOG2944 - Glyoxalase (1 of 4)									FALSE	TRUE		Cre07.g319150	Cre07.g355150
Cre12.g519651	0.0545798	0.0472806	0.304209	0.15392	-2.96043	-1.56581	0.231121	526	Cre12.g519651.t1.1	NA	NA									FALSE	FALSE		Cre07.g355600	Cre12.g484800
Cre04.g217939	0.206862	0.20064	0.682455	0.383891	-2.95969	-1.56545	0.204095	476	Cre04.g217939.t1.1	FAD5C	Fatty acid desaturase									FALSE	TRUE		Cre09.g394065	Cre14.g619200
Cre02.g075400	8.6051	4.63224	43.9054	46.0601	-2.95449	-1.56291	0.104166	367	Cre02.g075400.t1.1/Cre02.g075400.t2.1	NA	PF04749 - PLAC8 family (PLAC8) (1 of 12)									FALSE	FALSE		Cre01.g035800	Cre10.g427453
Cre06.g296983	0.591273	0.239282	2.53039	1.68106	-2.94935	-1.5604	0.127412	393	Cre06.g296983.t1.1	NA	K10685 - ubiquitin-like 1-activating enzyme E1 B (UBLE1B, SAE2, UBA2) (1 of 1)									FALSE	FALSE		Cre03.g144827	Cre06.g268976
Cre17.g740550	0.879895	0.384177	3.22274	0.874414	-2.94701	-1.55925	0.102248	370	Cre17.g740550.t1.1	NA	PTHR12203 - KDEL LYS-ASP-GLU-LEU CONTAINING - RELATED (1 of 83)									FALSE	TRUE		Cre17.g725150	Cre12.g531900
Cre16.g671850	0.15729	0.219614	0.355272	0.189368	-2.94453	-1.55804	0.224847	514	Cre16.g671850.t1.2	NA	PTHR22950 - AMINO ACID TRANSPORTER (1 of 8)									FALSE	TRUE		Cre16.g687406	Cre06.g268850
Cre08.g375650	0.673697	0.560686	2.25491	1.02807	-2.94337	-1.55747	0.115659	379	Cre08.g375650.t1.1	NA	PTHR22904:SF389 - DNA POLYMERASE INTERACTING TPR CONTAINING PROTEIN OF 47KD (1 of 1)									FALSE	FALSE		Cre10.g424400	Cre12.g527200
Cre12.g484200	4.43853	2.70579	17.1527	10.576	-2.94257	-1.55708	0.0536382	312	Cre12.g484200.t1.2	PPS2	Geranylgeranyl diphosphate synthase									FALSE	FALSE		Cre13.g602500	Cre01.g048102
Cre17.g706150	0.0743269	0.0643868	0.375207	0.0818517	-2.94124	-1.55642	0.157312	422	Cre17.g706150.t1.1	NA	NA									FALSE	TRUE		Cre09.g392655	Cre14.g609202
Cre07.g322700	0.0903918	0.156563	0.265289	0.0440023	-2.94033	-1.55598	0.211622	500	Cre07.g322700.t1.2	NA	NA									FALSE	FALSE		Cre08.g366450	Cre14.g612100
Cre06.g256850	0	0	0.119263	0.122304	-2.93857	-1.55511	0.238001	540	Cre06.g256850.t1.1/Cre06.g256850.t2.1	NA	2.1.1.43 - Histone-lysine N-methyltransferase / Protein-lysine N-methyltransferase (1 of 61)									TRUE	FALSE		Cre10.g466000	Cre11.g467663
Cre10.g441326	0	0	0.284267	0.291514	-2.93857	-1.55511	0.241345	544	Cre10.g441326.t1.1	NA	NA									TRUE	FALSE		Cre08.g367700	Cre09.g394806
Cre13.g582000	0	0	0.0883503	0.0906027	-2.93857	-1.55511	0.265139	582	Cre13.g582000.t1.2	NA	PTHR12203 - KDEL LYS-ASP-GLU-LEU CONTAINING - RELATED (1 of 83)									FALSE	FALSE		Cre06.g298802	Cre08.g358568
Cre02.g101200	0.437198	0.277377	1.83239	1.56918	-2.93278	-1.55227	0.170277	447	Cre02.g101200.t1.2	NA	PTHR23324:SF85 - CELLULAR RETINALDEHYDE-BINDING/TRIPLE FUNCTION DOMAIN-CONTAINING PROTEIN (1 of 1)									FALSE	TRUE		Cre05.g234100	Cre02.g107200
Cre07.g325050	1.71095	0.601849	6.80477	3.76885	-2.93231	-1.55204	0.0473787	300	Cre07.g325050.t1.1	ELG15	Exostosin-like glycosyltransferase									FALSE	TRUE		Cre08.g375500	Cre09.g416850
Cre09.g396289	0.264327	0.114178	0.98468	0.366328	-2.92964	-1.55072	0.0916419	360	Cre09.g396289.t1.1	NA	NA									FALSE	TRUE		Cre09.g407801	Cre12.g552100
Cre17.g699926	0.0399646	0.0352357	0.191948	0.114714	-2.92735	-1.5496	0.180251	456	Cre17.g699926.t1.1	NA	NA									FALSE	FALSE		Cre02.g146700	Cre12.g534350
Cre16.g670151	0.125312	0.142309	0.466431	0.197673	-2.92168	-1.5468	0.259007	578	Cre16.g670151.t1.1	NA	NA									FALSE	FALSE		Cre03.g163650	Cre12.g549500
Cre17.g702200	0.521352	0.179402	2.15702	1.29953	-2.92053	-1.54623	0.0993548	373	Cre17.g702200.t1.2	ANK29	Predicted protein with ankyrin repeats									FALSE	FALSE		Cre10.g457950	Cre13.g563400
Cre07.g321300	1.16861	0.43783	4.44986	2.00774	-2.91307	-1.54254	0.113857	384	Cre07.g321300.t1.2	NA	PF03703 - Bacterial PH domain (bPH_2) (1 of 3)									FALSE	TRUE		Cre09.g393200	Cre09.g401550
Cre12.g539850	0.0209627	0.0363085	0.207268	0.242286	-2.91196	-1.54199	0.282238	609	Cre12.g539850.t1.1/Cre12.g539850.t2.1	NA	NA									FALSE	FALSE		Cre06.g305050	Cre13.g584350
Cre07.g349900	0.445104	0.166393	1.7173	0.688857	-2.91063	-1.54133	0.0958546	372	Cre07.g349900.t1.1	NA	2.3.1.75 - Long-chain-alcohol O-fatty-acyltransferase / Wax synthase (1 of 8)									FALSE	FALSE		Cre13.g571800	Cre07.g329100
Cre06.g298600	0.341903	0.25841	1.60141	1.28134	-2.90863	-1.54034	0.21076	510	Cre06.g298600.t1.2	NA	PTHR13244 - ZINC FINGER MYND DOMAIN CONTAINING PROTEIN 10 (1 of 16)									FALSE	FALSE		Cre02.g085701	Cre11.g467585
Cre09.g397900	1.28935	0.818808	4.84528	3.29017	-2.90758	-1.53982	0.284772	616	Cre09.g397900.t1.2	NA	PTHR21347 - CLEFT LIP AND PALATE ASSOCIATED TRANSMEMBRANE PROTEIN-RELATED (1 of 1)									TRUE	FALSE		Cre02.g087900	Cre10.g432301
Cre12.g484834	0.033101	0.0286742	0.190396	0.100893	-2.90521	-1.53864	0.279654	608	Cre12.g484834.t1.1/Cre12.g484834.t2.1	NA	PTHR15535//PTHR15535:SF23 - TRANSMEMBRANE PROTEIN 2-RELATED // SUBFAMILY NOT NAMED (1 of 14)									FALSE	FALSE		Cre04.g217911	Cre06.g305900
Cre09.g404552	0.178922	0.309903	0.546873	0.246688	-2.90436	-1.53822	0.241054	559	Cre09.g404552.t1.1	NA	NA									FALSE	FALSE		Cre09.g391100	Cre08.g360950
Cre12.g490500	5.67685	4.86492	18.2779	6.69482	-2.89804	-1.53508	0.17235	455	Cre12.g490500.t1.2	CGL78	Predicted protein									TRUE	FALSE		Cre17.g716450	Cre12.g488752
Cre13.g581750	0.47929	0.370117	1.25962	0.251909	-2.89762	-1.53487	0.166639	449	Cre13.g581750.t1.2	NA	K10752 - histone-binding protein RBBP4 (RBBP4, HAT2, CAF1, MIS16) (1 of 3)									FALSE	FALSE		Cre02.g076000	Cre12.g558950
Cre08.g361600	0.320219	0.294804	0.99372	0.0712496	-2.89668	-1.5344	0.237395	556	Cre08.g361600.t1.1	NA	PF10250 - GDP-fucose protein O-fucosyltransferase (O-FucT) (1 of 3)									FALSE	FALSE		Cre17.g727450	Cre17.g727600
Cre10.g424775	0.335206	0.135915	1.1854	0.281293	-2.8952	-1.53366	0.0826724	353	Cre10.g424775.t1.1/Cre10.g424775.t2.1/Cre10.g424775.t3.1	NA	PTHR24093:SF124 - COPPER-TRANSPORTING ATPASE PAA1, CHLOROPLASTIC (1 of 1)									FALSE	TRUE		Cre11.g467693	Cre02.g074850
Cre02.g099055	0.711268	0.252908	2.4702	0.731048	-2.88912	-1.53063	0.155611	438	Cre02.g099055.t1.2	NA	PTHR19862:SF14 - WD REPEAT-CONTAINING PROTEIN 48 (1 of 20)									FALSE	FALSE		Cre12.g484300	Cre01.g065822
Cre08.g381983	0.0217996	0.0188843	0.179603	0.18387	-2.88631	-1.52923	0.218156	533	Cre08.g381983.t1.1/Cre08.g381983.t2.1	NA	NA									FALSE	FALSE		Cre03.g180750	Cre07.g331850
Cre10.g431850	1.42698	0.729627	4.81797	1.62175	-2.88254	-1.52734	0.0686447	342	Cre10.g431850.t1.2	NA	PTHR23029:SF49 - PHOSPHOHISTIDINE PHOSPHATASE SIXA (1 of 1)									FALSE	TRUE		Cre09.g388319	Cre16.g681351
Cre09.g387650	0	0	0.08977	0.0808151	-2.87891	-1.52552	0.190558	478	Cre09.g387650.t1.2	NA	NA									TRUE	FALSE		Cre13.g569450	Cre16.g683050
Cre11.g467713	0.0479148	0.0829909	0.334868	0.323349	-2.87849	-1.52531	0.252714	583	Cre11.g467713.t1.1	NA	NA									FALSE	FALSE		Cre10.g461850	Cre02.g118550
Cre08.g364450	3.06394	1.08368	12.7611	9.25679	-2.87346	-1.52279	0.0939744	376	Cre08.g364450.t1.2	NAT1	Peptide alpha-N-acetyltransferase									FALSE	FALSE		Cre06.g291950	Cre11.g475600
Cre05.g238761	0.175758	0.0628864	0.809481	0.362191	-2.87124	-1.52167	0.234222	555	Cre05.g238761.t1.1	NA	NA									FALSE	FALSE		Cre07.g318450	Cre01.g044150
Cre11.g467590	3.46781	2.27311	11.9033	5.91647	-2.86751	-1.5198	0.0674197	344	Cre11.g467590.t1.1	NA	NA									FALSE	FALSE		Cre08.g372300	Cre03.g189050
Cre05.g241100	1.70963	1.46622	5.21501	1.69972	-2.86689	-1.51949	0.206652	523	Cre05.g241100.t1.2	NA	PF10084 - Uncharacterized protein conserved in bacteria (DUF2322) (DUF2322) (1 of 2)									FALSE	FALSE		Cre16.g669850	Cre02.g103650
Cre06.g294600	0.269845	0.165478	0.936524	0.391674	-2.86534	-1.51871	0.171152	458	Cre06.g294600.t1.2	NA	PF15227 - zinc finger of C3HC4-type, RING (zf-C3HC4_4) (1 of 3)									FALSE	FALSE		Cre10.g433750	Cre09.g391282
Cre03.g201888	0.0349641	0.0605595	0.328533	0.307289	-2.86511	-1.51859	0.34353	721	Cre03.g201888.t1.1	NA	NA									FALSE	FALSE		Cre11.g467526	Cre01.g038750
Cre01.g039626	0.808184	0.47128	2.54748	0.75581	-2.8642	-1.51813	0.0835544	365	Cre01.g039626.t1.1	NA	NA									FALSE	FALSE		Cre13.g605100	Cre14.g610750
Cre10.g439350	3.0399	1.37085	12.106	7.91831	-2.86416	-1.51811	0.0642492	345	Cre10.g439350.t1.2	NA	PTHR17130:SF24 - GAN (1 of 2)									FALSE	FALSE		Cre17.g715350	Cre04.g226550
Cre07.g351825	0.0330515	0.00411172	0.162029	0.0816455	-2.85884	-1.51543	0.234424	562	Cre07.g351825.t1.1	NA	2.7.10.2//2.7.12.1 - Non-specific protein-tyrosine kinase / Cytoplasmic protein tyrosine kinase (1 of 8)									FALSE	FALSE		Cre07.g340900	Cre05.g240850
Cre11.g467686	0.0483688	0.0837773	0.150145	0.0368557	-2.85717	-1.51459	0.287772	639	Cre11.g467686.t1.1/Cre11.g467686.t2.1	NA	PF05548 - Gametolysin peptidase M11 (Peptidase_M11) (1 of 48)									FALSE	FALSE		Cre13.g580750	Cre14.g611517
Cre16.g676150	7.12993	1.00511	24.1595	2.97222	-2.85622	-1.51411	0.0749266	356	Cre16.g676150.t1.2	MSD3	Mn superoxide dismutase									FALSE	FALSE		Cre09.g397900	Cre14.g621850
Cre12.g524500	1.12803	0.552139	4.29328	2.6433	-2.85306	-1.51251	0.132437	420	Cre12.g524500.t1.2	RMT2	Rubisco small subunit N-methyltransferase									FALSE	TRUE		Cre10.g439150	Cre17.g739300
Cre17.g696950	0.206223	0.18182	0.644901	0.272785	-2.85084	-1.51139	0.201552	517	Cre17.g696950.t1.1	NA	KOG0198 - MEKK and related serine/threonine protein kinases (1 of 66)									FALSE	FALSE		Cre16.g674900	Cre17.g698700
Cre05.g236525	0.183986	0.0901015	0.675746	0.249072	-2.84949	-1.5107	0.157384	452	Cre05.g236525.t1.1	NA	NA									FALSE	FALSE		Cre12.g497950	Cre09.g392250
Cre09.g386167	0.952808	0.558586	3.03913	1.19287	-2.84768	-1.50979	0.234702	569	Cre09.g386167.t1.1	NA	NA									FALSE	FALSE		Cre13.g589450	Cre08.g359250
Cre01.g046652	1.66749	1.12493	5.61656	2.06732	-2.83897	-1.50537	0.174775	469	Cre01.g046652.t1.1	NA	K01866 - tyrosyl-tRNA synthetase (YARS, tyrS) (1 of 3)									FALSE	FALSE		Cre12.g532700	Cre11.g467653
Cre12.g544900	0.836377	0.733625	3.28409	2.74342	-2.83548	-1.50359	0.171664	465	Cre12.g544900.t1.2	NA	KOG1872 - Ubiquitin-specific protease (1 of 4)									FALSE	FALSE		Cre17.g728950	Cre09.g392245
Cre05.g233303	0.340945	0.0819866	1.43461	1.03385	-2.83457	-1.50313	0.10869	398	Cre05.g233303.t1.1/Cre05.g233303.t2.1	NA	K11718 - UDP-glucose:glycoprotein glucosyltransferase (HUGT) (1 of 1)									FALSE	FALSE		Cre10.g427250	Cre02.g143367
Cre10.g427350	2.94261	1.45846	10.1166	3.7793	-2.83098	-1.5013	0.0382646	320	Cre10.g427350.t1.1	NA	PTHR24286:SF77 - ABSCISIC ACID 8-HYDROXYLASE 4 (1 of 8)									FALSE	TRUE		Cre03.g144284	Cre07.g333535
Cre03.g193700	1.14071	0.661985	3.99659	1.89722	-2.83054	-1.50108	0.133002	426	Cre03.g193700.t1.1	NA	PTHR10992//PTHR10992:SF749 - ALPHA/BETA HYDROLASE FOLD-CONTAINING PROTEIN // SUBFAMILY NOT NAMED (1 of 1)									FALSE	FALSE		Cre17.g697750	Cre10.g426600
Cre03.g145807	0.435241	0.200492	1.46104	0.156759	-2.82899	-1.50029	0.144876	443	Cre03.g145807.t1.1	NA	PTHR12393:SF6 - SPHINGOMYELIN PHOSPHODIESTERASE 2 (1 of 100)									FALSE	FALSE		Cre14.g629464	Cre12.g514800
Cre17.g716750	9.28186	3.15356	31.1875	7.17426	-2.82709	-1.49932	0.0164232	280	Cre17.g716750.t1.1/Cre17.g716750.t2.1	NA	NA									FALSE	TRUE		Cre10.g462650	Cre09.g397142
Cre13.g576760	1.94681	0.684547	6.67214	2.19955	-2.82382	-1.49765	0.0476246	332	Cre13.g576760.t1.1	NA	PTHR14154:SF5 - EARLY LIGHT-INDUCED PROTEIN 1, CHLOROPLASTIC-RELATED (1 of 6)									FALSE	FALSE		Cre10.g442200	Cre02.g095053
Cre08.g379700	0.530696	0.409087	1.85875	1.04147	-2.82291	-1.49718	0.16723	461	Cre08.g379700.t1.2	NA	5.4.2.3 - Phosphoacetylglucosamine mutase / N-acetylglucosamine-phosphate mutase (1 of 1)									FALSE	TRUE		Cre02.g084550	Cre01.g035100
Cre01.g019550	0.0714963	0.0415518	0.32538	0.217112	-2.8187	-1.49503	0.200977	531	Cre01.g019550.t1.2	NA	PTHR24128:SF17 - E3 UBIQUITIN-PROTEIN LIGASE XBAT32 (1 of 2)									FALSE	FALSE		Cre12.g517500	Cre03.g202113
Cre09.g400300	3.27858	1.36187	11.4054	4.23522	-2.81603	-1.49366	0.0991657	395	Cre09.g400300.t1.1	NA	NA									FALSE	FALSE		Cre01.g018900	Cre12.g518500
Cre13.g604950	0.118617	0.103159	0.271365	0.0572201	-2.81303	-1.49213	0.229674	567	Cre13.g604950.t1.1/Cre13.g604950.t2.1/Cre13.g604950.t3.1	NA	NA									FALSE	FALSE		Cre06.g249800	Cre12.g522150
Cre13.g574551	0	0	0.146564	0.185221	-2.81197	-1.49158	0.19259	511	Cre13.g574551.t1.1	NA	NA									FALSE	FALSE		Cre16.g683250	Cre06.g257601
Cre15.g643499	0	0	0.209579	0.264858	-2.81197	-1.49158	0.221372	557	Cre15.g643499.t1.2	NA	NA									FALSE	FALSE		Cre10.g461050	Cre04.g217914
Cre14.g616376	0	0	0.206257	0.26066	-2.81197	-1.49158	0.276056	634	Cre14.g616376.t1.1	NA	NA									FALSE	FALSE		Cre01.g010800	Cre14.g621050
Cre02.g099452	0	0	0.171023	0.216132	-2.81197	-1.49158	0.318958	699	Cre02.g099452.t1.1	NA	NA									TRUE	FALSE		Cre03.g155051	Cre12.g555950
Cre16.g692350	0.205969	0.0890138	0.885702	0.715587	-2.81008	-1.49061	0.206229	538	Cre16.g692350.t1.1	NA	PF00069//PF07714 - Protein kinase domain (Pkinase) // Protein tyrosine kinase (Pkinase_Tyr) (1 of 52)									TRUE	FALSE		Cre10.g461250	Cre12.g509300
Cre02.g083350	0.360933	0.392869	1.00676	0.18554	-2.80979	-1.49046	0.207794	543	Cre02.g083350.t1.1	NA	PF07460 - NUMOD3 motif (2 copies) (NUMOD3) (1 of 14)									FALSE	FALSE		Cre09.g388750	Cre11.g467598
Cre09.g415900	0.588171	0.139501	2.55002	1.67644	-2.80783	-1.48946	0.136283	439	Cre09.g415900.t1.2	NA	Triose phosphate transporter									FALSE	TRUE		Cre13.g605350	Cre09.g396587
Cre03.g203200	0.457855	0.372067	1.38487	0.391261	-2.80782	-1.48945	0.151042	454	Cre03.g203200.t1.1	NA	NA									FALSE	FALSE		Cre16.g692004	Cre01.g066552
Cre16.g676309	5.81408	1.80207	19.8879	5.76071	-2.80392	-1.48745	0.0466521	336	Cre16.g676309.t1.1	NA	K08850 - aurora kinase, other [EC:2.7.11.1] (AURKX) (1 of 19)									FALSE	FALSE		Cre16.g665000	Cre08.g366250
Cre06.g294750	6.02622	3.42926	20.2642	8.82642	-2.80274	-1.48684	0.0839511	383	Cre06.g294750.t1.2	CHLG	Chlorophyll synthetase									FALSE	FALSE		Cre16.g682350	Cre13.g562400
Cre16.g653050	0.749413	0.740331	1.87297	0.931513	-2.80242	-1.48667	0.181431	501	Cre16.g653050.t1.1	NA	2.1.1.200 - tRNA (cytidine(32)/uridine(32)-2-O)-methyltransferase / TrMet(Xm32) (1 of 3)									FALSE	FALSE		Cre16.g682587	Cre05.g242850
Cre01.g038450	0.0187145	0.0324144	0.156438	0.136591	-2.79032	-1.48043	0.31295	695	Cre01.g038450.t1.2	NA	NA									TRUE	FALSE		Cre03.g206650	Cre05.g233600
Cre12.g507050	1.44487	0.354448	6.84157	6.03491	-2.78731	-1.47888	0.171993	487	Cre12.g507050.t1.2	NA	2.7.11.1 - Non-specific serine/threonine protein kinase / Threonine-specific protein kinase (1 of 543)									FALSE	FALSE		Cre01.g009150	Cre02.g112250
Cre09.g389950	1.77644	0.121212	7.30889	5.10375	-2.78532	-1.47784	0.117831	419	Cre09.g389950.t1.2	OAT1	O-acetyltransferase-related protein									FALSE	TRUE		Cre13.g605500	Cre06.g290050
Cre01.g017701	0.064414	0.056792	0.176163	0.106571	-2.78422	-1.47727	0.268993	635	Cre01.g017701.t1.1	NA	PF00078//PF03372 - Reverse transcriptase (RNA-dependent DNA polymerase) (RVT_1) // Endonuclease/Exonuclease/phosphatase family (Exo_endo_phos) (1 of 13)									FALSE	FALSE		Cre03.g178750	Cre12.g549450
Cre10.g452200	0.778966	0.276189	2.8162	1.46704	-2.78211	-1.47618	0.0707212	374	Cre10.g452200.t1.1	NA	NA									FALSE	FALSE		Cre03.g190900	Cre01.g027550
Cre14.g629920	14.4791	11.9903	47.3318	34.7594	-2.78099	-1.4756	0.139853	450	Cre14.g629920.t1.1	NA	K03320 - ammonium transporter, Amt family (amt, AMT, MEP) (1 of 8)									FALSE	FALSE		Cre03.g176150	Cre10.g443000
Cre11.g467627	0.105742	0.0378345	0.544657	0.436737	-2.78007	-1.47512	0.17529	495	Cre11.g467627.t1.1	NA	Cytochrome P450, CYP120 superfamily									FALSE	TRUE		Cre05.g238250	Cre11.g479900
Cre04.g224300	0.457762	0.216261	1.96179	1.58613	-2.7797	-1.47493	0.178061	506	Cre04.g224300.t1.1	CGL84	Conserved protein of unknown function									FALSE	TRUE		Cre02.g113050	Cre01.g044650
Cre10.g463550	0.102744	0.0935266	0.303927	0.183799	-2.77813	-1.47411	0.237438	595	Cre10.g463550.t1.1	NA	KOG0580//KOG0581//KOG0583 - Serine/threonine protein kinase // Mitogen-activated protein kinase kinase (MAP2K) // Serine/threonine protein kinase (1 of 2)									TRUE	FALSE		Cre17.g718100	Cre11.g476050
Cre15.g641500	0.0484312	0.0425282	0.26219	0.247596	-2.77477	-1.47237	0.297748	669	Cre15.g641500.t1.2	NA	NA									FALSE	FALSE		Cre03.g174800	Cre13.g590450
Cre35.g759447	0.123569	0.055732	0.489713	0.308148	-2.77467	-1.47232	0.231883	587	Cre35.g759447.t1.1	NA	NA									FALSE	FALSE		Cre16.g688500	Cre13.g589750
Cre17.g701917	0.0507977	0.0545674	0.171611	0.112282	-2.77272	-1.4713	0.287315	661	Cre17.g701917.t1.1	NA	PF02992 - Transposase family tnp2 (Transposase_21) (1 of 6)									FALSE	FALSE		Cre07.g329750	Cre11.g477900
Cre06.g250850	0.918824	0.597789	2.85775	1.34265	-2.77068	-1.47024	0.12381	437	Cre06.g250850.t1.1	MSH1	DNA mismatch repair protein, MutS homolog									FALSE	TRUE		Cre14.g623900	Cre07.g349250
Cre05.g241050	0.0886974	0.153628	0.490177	0.478306	-2.77056	-1.47018	0.300459	679	Cre05.g241050.t1.2	NA	NA									FALSE	FALSE		Cre12.g551100	Cre12.g486650
Cre06.g262100	3.94297	2.46038	12.5475	4.39887	-2.76751	-1.46859	0.11735	427	Cre06.g262100.t1.1	GSR1	Glutathione reductase									TRUE	FALSE		Cre03.g146487	Cre17.g739700
Cre08.g358575	0.265838	0.062512	0.981824	0.484783	-2.76352	-1.46651	0.115928	424	Cre08.g358575.t1.1	TRP7	Transient receptor potential ion channel protein									FALSE	TRUE		Cre02.g099100	Cre14.g622901
Cre03.g190700	0.399954	0.367691	1.18435	0.769454	-2.75848	-1.46387	0.185308	529	Cre03.g190700.t1.2	NA	NA									FALSE	FALSE		Cre16.g674964	Cre16.g672300
Cre01.g041000	3.82321	1.29261	13.2241	5.03582	-2.75649	-1.46283	0.0533606	359	Cre01.g041000.t1.1	NA	KOG3450 - Huntingtin interacting protein HYPK (1 of 1)									FALSE	TRUE		Cre12.g531100	Cre09.g394213
Cre17.g696800	0.18468	0.0956625	0.733136	0.426063	-2.75363	-1.46133	0.200457	550	Cre17.g696800.t1.1/Cre17.g696800.t2.1	NA	NA									FALSE	FALSE		Cre04.g223600	Cre06.g293800
Cre03.g196350	1.24059	0.655465	4.46304	2.3909	-2.7501	-1.45948	0.119426	435	Cre03.g196350.t1.2	NA	K09858 - SEC-C motif domain protein (K09858) (1 of 3)									FALSE	FALSE		Cre03.g176833	Cre17.g728650
Cre17.g731750	0.333414	0.249521	1.56008	1.8477	-2.74988	-1.45937	0.243478	611	Cre17.g731750.t1.1	NA	Cytochrome P450, CYP26 superfamily									TRUE	FALSE		Cre16.g691215	Cre10.g426800
Cre09.g402600	0.489868	0.413644	1.41568	0.0893259	-2.74918	-1.459	0.19419	541	Cre09.g402600.t1.1	NA	NA									TRUE	FALSE		Cre13.g586150	Cre03.g212417
Cre06.g278245	0.920504	0.185444	3.14372	0.508644	-2.74842	-1.4586	0.182368	530	Cre06.g278245.t1.1	NA	Pheophorbide a oxygenase, Rieske iron-sulfur cluster protein									TRUE	FALSE		Cre06.g278115	Cre13.g572700
Cre12.g509600	0.330882	0.487674	0.733859	0.408076	-2.74583	-1.45724	0.317541	719	Cre12.g509600.t1.1	NA	K15441 - tRNA-specific adenosine deaminase 2 [EC:3.5.4.-] (TAD2, ADAT2) (1 of 1)									FALSE	FALSE		Cre12.g535400	Cre11.g467350
Cre04.g218000	0.406537	0.125746	1.37544	0.309108	-2.74462	-1.4566	0.203296	564	Cre04.g218000.t1.1	NA	NA									FALSE	FALSE		Cre11.g475200	Cre02.g085150
Cre03.g183451	0.139393	0.0856791	0.46398	0.0529311	-2.73996	-1.45415	0.186581	536	Cre03.g183451.t1.1	NA	NA									FALSE	FALSE		Cre13.g592100	Cre17.g704300
Cre02.g076750	1.88065	1.15328	6.17188	3.37124	-2.73728	-1.45274	0.134766	459	Cre02.g076750.t1.1	NUOAF1	Complex I intermediate-associated CIA30 protein, mitochondrial									FALSE	FALSE		Cre13.g590650	Cre10.g464650
Cre13.g565675	0.0388254	0.0413239	0.143455	0.0959556	-2.73215	-1.45003	0.275425	656	Cre13.g565675.t1.1	NA	NA									FALSE	FALSE		Cre08.g365950	Cre06.g296200
Cre16.g676000	0.146275	0.0564114	0.552906	0.295976	-2.73011	-1.44896	0.142888	467	Cre16.g676000.t1.2	NA	PTHR12298 - PCDC2 PROGRAMMED CELL DEATH PROTEIN 2 -RELATED (1 of 39)									FALSE	TRUE		Cre12.g544400	Cre12.g561000
Cre10.g441700	0.061051	0.0529587	0.154118	0.0333273	-2.72867	-1.4482	0.241484	617	Cre10.g441700.t1.1	NA	NA									FALSE	FALSE		Cre03.g200150	Cre02.g074720
Cre46.g761047	0	0	0.175229	0.161948	-2.72464	-1.44607	0.368132	805	Cre46.g761047.t1.1	NA	PF13469 - Sulfotransferase family (Sulfotransfer_3) (1 of 4)									FALSE	FALSE		Cre03.g149250	Cre15.g637900
Cre16.g675900	0.343876	0.224119	1.21641	0.79201	-2.7215	-1.4444	0.175919	532	Cre16.g675900.t1.2	OAD1	Arginine/ornithine decarboxylase									FALSE	TRUE		Cre12.g522450	Cre04.g228550
Cre06.g261500	2.43239	1.02741	8.66663	4.2283	-2.71891	-1.44303	0.171294	524	Cre06.g261500.t1.2	NA	PTHR11260:SF136 - THIOREDOXIN FAMILY PROTEIN (1 of 1)									TRUE	FALSE		Cre03.g193800	Cre03.g163050
Cre09.g397845	0.189286	0.131739	0.719656	0.439956	-2.71866	-1.44289	0.23737	613	Cre09.g397845.t1.1	NA	K08736 - DNA mismatch repair protein MSH3 (MSH3) (1 of 1)									FALSE	TRUE		Cre02.g142601	Cre09.g417150
Cre02.g111350	0.426905	0.201714	1.38221	0.189296	-2.7172	-1.44212	0.192965	551	Cre02.g111350.t1.2	NA	PTHR14773:SF0 - WD REPEAT-CONTAINING PROTEIN 76 (1 of 1)									FALSE	FALSE		Cre02.g079351	Cre16.g680950
Cre04.g214657	0.0786736	0.0397037	0.29322	0.130772	-2.71373	-1.44028	0.230966	603	Cre04.g214657.t1.1	NA	K03549 - KUP system potassium uptake protein (kup) (1 of 5)									FALSE	FALSE		Cre07.g341550	Cre10.g421100
Cre06.g260650	0.486688	0.37531	1.63318	0.942956	-2.71364	-1.44023	0.161573	507	Cre06.g260650.t1.1	NA	PTHR31362:SF0 - PROTEIN E03H4.4-RELATED (1 of 2)									FALSE	TRUE		Cre16.g651750	Cre09.g392300
Cre07.g344550	3.18145	2.54322	10.1621	5.5758	-2.71262	-1.43969	0.193177	554	Cre07.g344550.t1.2	NA	1.1.1.95 - Phosphoglycerate dehydrogenase / Phosphoglyceric acid dehydrogenase (1 of 3)									FALSE	FALSE		Cre12.g523500	Cre12.g484350
Cre02.g095148	0.848988	0.800657	2.8095	1.98292	-2.71046	-1.43854	0.165439	512	Cre02.g095148.t1.1	NA	NA									FALSE	FALSE		Cre12.g519150	Cre07.g353555
Cre01.g033500	0.294525	0.253566	0.974633	0.512678	-2.70883	-1.43767	0.262721	647	Cre01.g033500.t1.2	NA	PTHR12393:SF6 - SPHINGOMYELIN PHOSPHODIESTERASE 2 (1 of 100)									FALSE	FALSE		Cre05.g247700	Cre02.g143347
Cre06.g304100	1.09222	0.262621	3.75244	1.2061	-2.70731	-1.43686	0.0778446	407	Cre06.g304100.t1.2	NA	K17261 - adenylyl cyclase-associated protein (CAP1_2, SRV2) (1 of 1)									FALSE	FALSE		Cre02.g095093	Cre05.g241950
Cre03.g162333	0.0538671	0.0441326	0.179086	0.0621851	-2.70702	-1.43671	0.149728	485	Cre03.g162333.t1.1	NA	KOG0061 - Transporter, ABC superfamily (Breast cancer resistance protein) (1 of 18)									FALSE	FALSE		Cre12.g506851	Cre01.g026900
Cre12.g494052	0.0202797	0.0351254	0.130659	0.117622	-2.70649	-1.43642	0.352172	785	Cre12.g494052.t1.1	NA	NA									TRUE	FALSE		Cre06.g299750	Cre11.g467562
Cre02.g143367	0.587589	0.101552	2.33666	1.38723	-2.7063	-1.43632	0.250517	638	Cre02.g143367.t1.1	NA	NA									FALSE	TRUE		Cre12.g524750	Cre06.g278137
Cre11.g468000	0.143409	0.190931	0.358722	0.0782555	-2.70318	-1.43466	0.243309	631	Cre11.g468000.t1.2	NA	2.7.7.48//2.7.7.6 - RNA-directed RNA polymerase / RNA nucleotidyltransferase (RNA-directed) // DNA-directed RNA polymerase / RNA polymerase III (1 of 1)									TRUE	FALSE		Cre16.g670100	Cre07.g320750
Cre16.g662200	1.04587	0.207047	3.68516	1.71359	-2.70102	-1.4335	0.161402	515	Cre16.g662200.t1.1	NA	3.6.1.25//3.6.1.3 - Adenosinetriphosphatase / Triphosphatase (1 of 1)									FALSE	FALSE		Cre03.g196050	Cre15.g636050
Cre10.g455950	0.443123	0.256015	1.55454	0.883231	-2.6984	-1.4321	0.212937	593	Cre10.g455950.t1.1	NA	K03809 - NAD(P)H dehydrogenase (quinone) (wrbA) (1 of 4)									FALSE	TRUE		Cre01.g031650	Cre12.g494800
Cre15.g641266	0.642777	0.0754931	3.07468	2.63638	-2.69814	-1.43197	0.19769	575	Cre15.g641266.t1.1/Cre15.g641266.t2.1	NA	K15285 - solute carrier family 35, member E3 (SLC35E3) (1 of 4)									FALSE	FALSE		Cre17.g726150	Cre13.g603600
Cre03.g162550	1.30453	0.891267	4.72583	3.22977	-2.69782	-1.4318	0.1495	491	Cre03.g162550.t1.1	NA	3.2.2.9 - Adenosylhomocysteine nucleosidase / S-adenosylhomocysteine/5-methylthioadenosine nucleosidase (1 of 1)									FALSE	TRUE		Cre02.g074250	Cre16.g679781
Cre07.g334100	2.9351	1.21955	10.0274	4.52495	-2.69285	-1.42913	0.0763706	411	Cre07.g334100.t1.1	NA	K18443 - golgi-specific brefeldin A-resistance guanine nucleotide exchange factor 1 (GBF1) (1 of 1)									TRUE	FALSE		Cre08.g376350	Cre12.g497800
Cre12.g557250	2.87107	1.66809	10.5981	7.60314	-2.69194	-1.42865	0.139386	477	Cre12.g557250.t1.2/Cre12.g557250.t2.1	NA	PTHR11216//PTHR11216:SF1 - EH DOMAIN // SUBFAMILY NOT NAMED (1 of 1)									TRUE	FALSE		Cre04.g220387	Cre13.g588800
Cre03.g170800	14.5471	9.88674	47.0393	26.591	-2.69192	-1.42864	0.0985044	432	Cre03.g170800.t1.2	NA	PTHR12231//PTHR12231:SF138 - CTX-RELATED TYPE I TRANSMEMBRANE PROTEIN // SUBFAMILY NOT NAMED (1 of 1)									FALSE	FALSE		Cre11.g467612	Cre02.g146300
Cre12.g531900	1.14711	0.34439	3.88489	1.38164	-2.69087	-1.42807	0.162586	527	Cre12.g531900.t1.2	NA	PF00258//PF01613 - Flavodoxin (Flavodoxin_1) // Flavin reductase like domain (Flavin_Reduct) (1 of 1)									FALSE	TRUE		Cre12.g507150	Cre02.g077650
Cre09.g398700	0.851641	0.559699	2.59429	0.284746	-2.68855	-1.42683	0.115033	451	Cre09.g398700.t1.2	CFA2	Cyclopropane-fatty-acyl-phospholipid synthase									TRUE	FALSE		Cre02.g095087	Cre06.g271050
Cre10.g438050	0.388516	0.113812	1.42176	0.641953	-2.68816	-1.42662	0.176828	546	Cre10.g438050.t1.1	NA	PTHR11712:SF273 - 3-OXOACYL-[ACYL-CARRIER-PROTEIN] SYNTHASE, MITOCHONDRIAL (1 of 1)									FALSE	FALSE		Cre13.g604800	Cre06.g279700
Cre03.g163650	0.166546	0.135837	0.56413	0.195046	-2.68724	-1.42613	0.176193	542	Cre03.g163650.t1.2	NA	NA									TRUE	FALSE		Cre07.g318800	Cre13.g607100
Cre05.g238500	0.62893	0.188311	2.37499	1.40746	-2.68707	-1.42603	0.169414	535	Cre05.g238500.t1.1	NA	K06941 - 23S rRNA (adenine2503-C2)-methyltransferase [EC:2.1.1.192] (rlmN) (1 of 4)									FALSE	TRUE		Cre12.g548900	Cre16.g690319
Cre11.g482750	0.265793	0.123028	0.848754	0.0242522	-2.68581	-1.42536	0.102028	441	Cre11.g482750.t1.2/Cre11.g482750.t2.1	NA	PTHR12363 - TRANSPORTIN 3 AND IMPORTIN 13 (1 of 3)									TRUE	FALSE		Cre10.g419000	Cre01.g045350
Cre16.g671400	0.127185	0.174224	0.30764	0.0510482	-2.68455	-1.42468	0.23133	621	Cre16.g671400.t1.2	ARS1	Periplasmic arylsulfatase									FALSE	FALSE		Cre15.g637150	Cre06.g289900
Cre10.g456100	0.437118	0.380426	1.42658	1.50658	-2.68406	-1.42442	0.303408	725	Cre10.g456100.t1.2	AGG3	Flagellar flavodoxin, involved in phototaxis									TRUE	FALSE		Cre13.g583550	Cre01.g040850
Cre01.g014200	0.0153901	0.0266564	0.20145	0.186181	-2.68262	-1.42364	0.346708	788	Cre01.g014200.t1.2	NA	NA									FALSE	FALSE		Cre07.g330300	Cre06.g284550
Cre17.g737400	0.601061	0.151313	2.12772	1.13081	-2.68133	-1.42295	0.143052	497	Cre17.g737400.t1.1/Cre17.g737400.t2.1	NA	NA									FALSE	TRUE		Cre16.g685277	Cre07.g347000
Cre10.g447900	0.712333	0.487864	2.9136	2.53299	-2.68129	-1.42293	0.188659	570	Cre10.g447900.t1.2/Cre10.g447900.t2.1	NA	PF12239 - Protein of unknown function (DUF3605) (DUF3605) (1 of 1)									FALSE	TRUE		Cre16.g659200	Cre02.g097221
Cre17.g730700	1.71071	0.903231	5.57817	2.80946	-2.68067	-1.42259	0.144485	502	Cre17.g730700.t1.1	NA	PTHR11732//PTHR11732:SF2 - ALDO/KETO REDUCTASE // SUBFAMILY NOT NAMED (1 of 1)									TRUE	FALSE		Cre11.g477050	Cre17.g705450
Cre06.g276750	0.820997	0.433719	2.71404	0.645382	-2.67955	-1.42199	0.243366	643	Cre06.g276750.t1.1	NA	NA									FALSE	FALSE		Cre05.g234850	Cre02.g077600
Cre05.g241640	0.0396233	0.0399851	0.224175	0.176853	-2.67599	-1.42007	0.277763	682	Cre05.g241640.t1.1/Cre05.g241640.t2.1	NA	NA									FALSE	FALSE		Cre12.g498000	Cre06.g263700
Cre12.g523300	5.11931	3.54581	17.0692	10.5725	-2.67595	-1.42005	0.126959	474	Cre12.g523300.t1.2	GTR22	Glycosyltransferase									FALSE	FALSE		Cre02.g113000	Cre03.g153900
Cre01.g006656	0.163497	0.141632	0.750948	0.184333	-2.67535	-1.41973	0.320786	751	Cre01.g006656.t1.1	NA	NA									TRUE	FALSE		Cre09.g398067	Cre17.g700050
Cre13.g577650	0.305124	0.270814	0.601165	0.137419	-2.67437	-1.4192	0.28455	703	Cre13.g577650.t1.1	NA	NA									FALSE	FALSE		Cre10.g461319	Cre12.g545950
Cre05.g239100	0.341342	0.22106	1.10846	0.560175	-2.6737	-1.41884	0.194915	586	Cre05.g239100.t1.1	NA	K01930 - folylpolyglutamate synthase (FPGS) (1 of 1)									FALSE	FALSE		Cre10.g457150	Cre08.g373450
Cre05.g230803	0.157705	0.159145	1.02965	0.945001	-2.67253	-1.4182	0.318294	749	Cre05.g230803.t1.1	NA	PTHR10799:SF573 - TRANSCRIPTION TERMINATION FACTOR 2 (1 of 1)									FALSE	FALSE		Cre02.g095104	Cre16.g678851
Cre12.g549852	0.297641	0.300537	0.79599	0.429365	-2.67038	-1.41705	0.351983	806	Cre12.g549852.t1.1	NA	KOG1611 - Predicted short chain-type dehydrogenase (1 of 2)									TRUE	FALSE		Cre12.g522750	Cre17.g708800
Cre10.g419443	0.275458	0.111742	1.09963	0.711922	-2.66543	-1.41437	0.265411	668	Cre10.g419443.t1.2	NA	NA									TRUE	FALSE		Cre17.g707900	Cre09.g392282
Cre10.g421576	0.188273	0.191753	0.545142	0.0205152	-2.6631	-1.41311	0.254452	662	Cre10.g421576.t1.1	NA	NA									FALSE	FALSE		Cre16.g654400	Cre08.g358571
Cre02.g095151	0.634895	0.358286	2.57752	2.18109	-2.66009	-1.41148	0.197134	592	Cre02.g095151.t1.1	NA	KOG0061 - Transporter, ABC superfamily (Breast cancer resistance protein) (1 of 18)									TRUE	FALSE		Cre09.g390319	Cre01.g047800
Cre13.g566350	0.176438	0.118311	0.489991	0.1683	-2.65836	-1.41053	0.293938	720	Cre13.g566350.t1.1	NA	2.7.10.1 - Receptor protein-tyrosine kinase / Receptor protein tyrosine kinase (1 of 6)									FALSE	FALSE		Cre03.g210401	Cre14.g611300
Cre09.g388430	3.8554	1.88291	12.3587	4.58268	-2.65721	-1.40991	0.0538161	400	Cre09.g388430.t1.1	NA	PF00397 - WW domain (WW) (1 of 19)									FALSE	TRUE		Cre02.g095098	Cre01.g038050
Cre02.g120001	0.103407	0.104351	0.329353	0.284937	-2.64828	-1.40506	0.328844	770	Cre02.g120001.t1.1	NA	NA									FALSE	FALSE		Cre17.g735450	Cre05.g236878
Cre09.g404250	0.0052005	0.00900754	0.0344285	0.0309934	-2.64689	-1.4043	0.252448	663	Cre09.g404250.t1.1	NA	PF00112//PF01476//PF07645 - Papain family cysteine protease (Peptidase_C1) // LysM domain (LysM) // Calcium-binding EGF domain (EGF_CA) (1 of 1)									FALSE	FALSE		Cre03.g173300	Cre03.g152550
Cre02.g074800	0.0334144	0.0203724	0.141957	0.114639	-2.64587	-1.40374	0.275259	688	Cre02.g074800.t1.1/Cre02.g074800.t2.1	CYG9	Adenylate/guanylate cyclase									FALSE	TRUE		Cre02.g116650	Cre02.g141550
Cre06.g292750	0.122973	0.0602221	0.413435	0.0449293	-2.63934	-1.40018	0.387173	873	Cre06.g292750.t1.2	NA	PF05694 - 56kDa selenium binding protein (SBP56) (SBP56) (1 of 2)									FALSE	FALSE		Cre01.g011550	Cre12.g551800
Cre13.g587500	0.541806	0.19443	1.84951	0.835249	-2.63854	-1.39974	0.129082	488	Cre13.g587500.t1.1/Cre13.g587500.t2.1	NA	1.3.5.5 - 15-cis-phytoene desaturase / Plant-type phytoene desaturase (1 of 2)									FALSE	FALSE		Cre09.g406400	Cre11.g480250
Cre10.g447600	0.0701655	0.0659857	0.304947	0.285522	-2.63656	-1.39866	0.289494	717	Cre10.g447600.t1.2	NA	NA									FALSE	FALSE		Cre07.g350750	Cre13.g585600
Cre12.g522450	2.91224	2.31876	8.30197	3.20868	-2.63277	-1.39658	0.191042	589	Cre12.g522450.t1.2	SEC31	COP-II coat subunit									TRUE	FALSE		Cre17.g728150	Cre07.g316650
Cre07.g329500	0.596145	0.336151	1.92802	0.842482	-2.62794	-1.39393	0.166687	552	Cre07.g329500.t1.2/Cre07.g329500.t2.1	SUB1	Secreted protease and protease inhibitor									FALSE	FALSE		Cre06.g278107	Cre10.g446350
Cre17.g716600	0.871638	0.33096	2.99489	1.55904	-2.62738	-1.39362	0.120357	475	Cre17.g716600.t1.1/Cre17.g716600.t2.1	NA	NA									FALSE	TRUE		Cre04.g229700	Cre04.g213950
Cre12.g493650	0.574994	0.415061	1.83561	0.950086	-2.62726	-1.39356	0.218213	627	Cre12.g493650.t1.2	NA	NA									TRUE	FALSE		Cre24.g755647	Cre12.g507800
Cre02.g108200	0.142926	0.0878509	0.560007	0.31701	-2.6262	-1.39298	0.221722	632	Cre02.g108200.t1.1	CGL80	Predicted protein									FALSE	FALSE		Cre01.g004900	Cre17.g727250
Cre14.g615450	0.577877	0.61403	1.32669	0.410188	-2.62364	-1.39157	0.209573	618	Cre14.g615450.t1.2	NA	NA									FALSE	FALSE		Cre03.g173350	Cre13.g603100
Cre08.g365950	1.55864	0.741112	5.63861	3.67353	-2.6154	-1.38703	0.136571	516	Cre08.g365950.t1.2	NA	PTHR22753:SF1 - TRANSMEMBRANE PROTEIN 68 (1 of 3)									TRUE	FALSE		Cre01.g014900	Cre07.g327687
Cre12.g532700	0.859096	0.328105	2.78174	0.888682	-2.61405	-1.38628	0.12514	493	Cre12.g532700.t1.1	NA	NA									TRUE	FALSE		Cre13.g588736	Cre02.g108550
Cre13.g590950	0.783892	0.442497	2.58741	1.40178	-2.61371	-1.3861	0.173398	574	Cre13.g590950.t1.2	NA	NA									FALSE	FALSE		Cre01.g021600	Cre07.g348650
Cre05.g246750	0.125982	0.0635788	0.398188	0.118759	-2.61093	-1.38456	0.152016	537	Cre05.g246750.t1.1	NA	NA									FALSE	TRUE		Cre12.g494400	Cre14.g628237
Cre17.g702500	6.49302	3.09619	21.343	10.0208	-2.60889	-1.38343	0.0827419	444	Cre17.g702500.t1.2	TAB2	PsaB RNA binding protein									FALSE	FALSE		Cre07.g316050	Cre14.g634000
Cre02.g094426	0	0	0.28997	0.286942	-2.60199	-1.37961	0.351408	827	Cre02.g094426.t1.1	NA	NA									FALSE	FALSE		Cre10.g424450	Cre03.g144264
Cre08.g381650	0.171853	0.225206	0.585987	0.613766	-2.59988	-1.37845	0.30097	744	Cre08.g381650.t1.1	NA	PTHR12265:SF0 - TRANSMEMBRANE PROTEIN 53 (1 of 1)									FALSE	FALSE		Cre03.g189950	Cre12.g487950
Cre10.g445952	0.554653	0.397147	1.68916	0.692	-2.59928	-1.37811	0.190718	597	Cre10.g445952.t1.1	NA	NA									FALSE	FALSE		Cre09.g393395	Cre03.g153400
Cre07.g357900	1.66243	0.836656	5.48688	3.03343	-2.59809	-1.37745	0.155523	548	Cre07.g357900.t1.2	NA	K08054 - calnexin (CANX) (1 of 1)									FALSE	TRUE		Cre06.g282826	Cre13.g562550
Cre14.g626900	2.22602	0.408177	8.44239	5.58721	-2.59638	-1.3765	0.134175	520	Cre14.g626900.t1.2	NA	K17497 - phosphomannomutase (PMM) (1 of 1)									FALSE	FALSE		Cre01.g000300	Cre09.g411666
Cre02.g118151	0.117217	0.110234	0.363237	0.0792405	-2.59594	-1.37626	0.397111	909	Cre02.g118151.t1.1	NA	NA									TRUE	FALSE		Cre12.g555001	Cre03.g176750
Cre06.g278185	5.82952	1.26222	18.851	7.45174	-2.59444	-1.37542	0.0722372	433	Cre06.g278185.t1.1	UGD2	UDP-glucose dehydrogenase									TRUE	FALSE		Cre01.g028777	Cre10.g432550
Cre17.g726150	0.444773	0.197755	1.80526	1.40581	-2.59194	-1.37403	0.206633	625	Cre17.g726150.t1.1	NA	PTHR23073:SF29 - P-LOOP CONTAINING NUCLEOSIDE TRIPHOSPHATE HYDROLASES SUPERFAMILY PROTEIN (1 of 1)									TRUE	FALSE		Cre01.g017500	Cre06.g296750
Cre10.g436500	0	0	0.0956727	0.0867573	-2.58994	-1.37292	0.246947	667	Cre10.g436500.t1.2	NA	PTHR30457:SF0 - 5/3-NUCLEOTIDASE SURE (1 of 1)									FALSE	FALSE		Cre04.g225176	Cre15.g638650
Cre17.g701751	0	0	0.0584594	0.0530117	-2.58994	-1.37292	0.26509	694	Cre17.g701751.t1.1	NA	PTHR13078:SF53 - PROTEIN MAOC-1 (1 of 32)									FALSE	FALSE		Cre14.g630895	Cre09.g410800
Cre03.g157550	0	0	0.0623937	0.0565795	-2.58994	-1.37292	0.348681	829	Cre03.g157550.t1.2	NA	NA									FALSE	FALSE		Cre16.g683081	Cre16.g661300
Cre17.g725600	0.436217	0.0709617	1.56729	0.854019	-2.58994	-1.37292	0.170373	577	Cre17.g725600.t1.1	NA	NA									FALSE	TRUE		Cre10.g447100	Cre09.g391353
Cre01.g014350	6.75113	3.88327	23.3115	15.0738	-2.58802	-1.37185	0.113588	479	Cre01.g014350.t1.2	PRX5	Peroxiredoxin, type II									FALSE	FALSE		Cre03.g180250	Cre11.g467677
Cre24.g755997	0.25303	0.316188	0.497701	0.35147	-2.58771	-1.37167	0.334855	801	Cre24.g755997.t1.1	PHC18	Cell wall protein pherophorin-C18									FALSE	FALSE		Cre09.g396300	Cre10.g437950
Cre10.g429150	3.83019	3.27548	11.0881	6.29314	-2.58674	-1.37113	0.204101	624	Cre10.g429150.t1.2	PRT1	Anthranilate phosphoribosyltransferase									FALSE	FALSE		Cre01.g019500	Cre06.g268950
Cre09.g389838	12.2188	5.15952	37.1538	10.3349	-2.58657	-1.37104	0.0755372	446	Cre09.g389838.t1.1	NA	PF00076 - RNA recognition motif. (a.k.a. RRM, RBD, or RNP domain) (RRM_1) (1 of 90)									FALSE	FALSE		Cre03.g155100	Cre17.g703900
Cre11.g477950	0.969375	0.954959	2.84426	1.92137	-2.58508	-1.37021	0.184191	600	Cre11.g477950.t1.1	NA	PTHR16222//PTHR16222:SF17 - ADP-RIBOSYLGLYCOHYDROLASE // SUBFAMILY NOT NAMED (1 of 4)									FALSE	FALSE		Cre16.g684850	Cre11.g479450
Cre14.g629880	0.651217	0.182611	2.11587	0.639129	-2.57881	-1.36671	0.127168	518	Cre14.g629880.t1.1	NA	PF12937 - F-box-like (F-box-like) (1 of 16)									FALSE	TRUE		Cre05.g246400	Cre07.g349200
Cre17.g696900	0.657544	0.132196	2.08281	0.590089	-2.57864	-1.36661	0.157627	563	Cre17.g696900.t1.1	NA	Serine/threonine protein kinase									FALSE	FALSE		Cre02.g090850	Cre02.g098350
Cre10.g428400	0.690051	0.430231	2.09183	0.808443	-2.57758	-1.36602	0.224459	645	Cre10.g428400.t1.1	PUS7	tRNA-pseudouridine synthase									FALSE	FALSE		Cre10.g449150	Cre01.g038650
Cre01.g038400	27.8919	14.2278	88.5014	40.5342	-2.57635	-1.36533	0.11374	486	Cre01.g038400.t1.2	CRT2	Calreticulin 2, calcium-binding protein									TRUE	FALSE		Cre01.g004500	Cre08.g358850
Cre09.g399141	0.697343	0.277619	2.22166	0.741128	-2.57499	-1.36457	0.232392	659	Cre09.g399141.t1.1	NA	PTHR11662:SF282 - ANION TRANSPORTER 5-RELATED (1 of 1)									FALSE	FALSE		Cre12.g515850	Cre06.g299600
Cre12.g540700	0.8633	0.426779	2.81489	1.41677	-2.57415	-1.36409	0.1892	604	Cre12.g540700.t1.1/Cre12.g540700.t2.1	NA	NA									FALSE	TRUE		Cre12.g503600	Cre16.g663450
Cre02.g117500	3.26271	0.981104	10.9227	5.22471	-2.57399	-1.364	0.0995687	473	Cre02.g117500.t1.2	HXK1	Hexokinase									FALSE	TRUE		Cre10.g435200	Cre14.g627576
Cre06.g294550	0.201447	0.180725	0.603973	0.362197	-2.57392	-1.36397	0.261651	700	Cre06.g294550.t1.2	NA	PF05684 - Protein of unknown function (DUF819) (DUF819) (1 of 2)									FALSE	TRUE		Cre01.g040476	Cre15.g636750
Cre03.g208161	0.413449	0.261287	1.1899	0.47931	-2.57376	-1.36388	0.200595	626	Cre03.g208161.t1.1	NA	NA									FALSE	FALSE		Cre12.g514750	Cre12.g553900
Cre02.g098000	0.0823472	0.0887625	0.263295	0.167241	-2.57158	-1.36266	0.326403	795	Cre02.g098000.t1.2	NA	K19355 - mannan endo-1,4-beta-mannosidase (MAN) (1 of 4)									FALSE	FALSE		Cre16.g676600	Cre03.g167101
Cre07.g315900	3.46116	2.04538	10.9407	5.1003	-2.57063	-1.36212	0.165454	579	Cre07.g315900.t1.2	NA	PTHR22811:SF58 - TRANSMEMBRANE EMP24 DOMAIN-CONTAINING PROTEIN 10 (1 of 1)									TRUE	FALSE		Cre03.g190950	Cre03.g204465
Cre01.g023250	0.392526	0.293083	1.13004	0.650952	-2.56872	-1.36105	0.260071	704	Cre01.g023250.t1.1	NA	NA									FALSE	TRUE		Cre07.g312550	Cre02.g080500
Cre16.g693800	0.383873	0.226486	1.15647	0.237146	-2.56764	-1.36044	0.169403	585	Cre16.g693800.t1.1	NA	PTHR22883:SF35 - PALMITOYLTRANSFERASE ZDHHC6 (1 of 1)									FALSE	FALSE		Cre07.g351150	Cre02.g119850
Cre21.g752597	0.189479	0.187779	0.555719	0.312515	-2.55875	-1.35544	0.330658	809	Cre21.g752597.t1.1	NA	NA									FALSE	FALSE		Cre02.g113652	Cre02.g085257
Cre16.g672800	6.31605	2.81478	20.8384	10.349	-2.55783	-1.35492	0.110918	492	Cre16.g672800.t1.2	GMP1	GDP-D-mannose pyrophosphorylase									FALSE	FALSE		Cre11.g467610	Cre07.g331450
Cre04.g217945	0.244829	0.177068	1.33975	1.74277	-2.55779	-1.3549	0.35905	859	Cre04.g217945.t1.1/Cre04.g217945.t2.1/Cre04.g217945.t3.1	NA	Fatty acid desaturase									FALSE	TRUE		Cre14.g629500	Cre14.g629880
Cre06.g261950	0.0620053	0.107396	0.254299	0.0554756	-2.55659	-1.35422	0.33128	811	Cre06.g261950.t1.2	ANK11	Predicted protein with ankyrin repeats									TRUE	FALSE		Cre12.g487300	Cre13.g579350
Cre06.g250400	0.0269172	0.046622	0.110394	0.0240826	-2.55659	-1.35422	0.35095	846	Cre06.g250400.t1.2	NA	PTHR15535 - TRANSMEMBRANE PROTEIN 2-RELATED (1 of 88)									FALSE	FALSE		Cre16.g689950	Cre02.g111000
Cre03.g193550	0.356326	0.328045	1.58315	1.66584	-2.55635	-1.35409	0.288696	746	Cre03.g193550.t1.1	MRPL46	Putative mitochondrial ribosomal protein L46, imported to mitochondria, Mitochondrial ribosomal protein L17									FALSE	FALSE		Cre10.g446700	Cre10.g437150
Cre12.g547300	3.79982	1.57533	13.3907	8.85731	-2.55577	-1.35376	0.19385	619	Cre12.g547300.t1.1	NA	KOG0061 - Transporter, ABC superfamily (Breast cancer resistance protein) (1 of 18)									FALSE	FALSE		Cre24.g755697	Cre16.g671500
Cre11.g467597	7.683	3.54642	24.6063	14.376	-2.55391	-1.35271	0.139059	547	Cre11.g467597.t1.1	NA	PTHR19241:SF262 - ABC TRANSPORTER G FAMILY MEMBER 7 (1 of 2)									FALSE	TRUE		Cre14.g630883	Cre12.g533950
Cre03.g199150	2.05767	1.11541	6.77957	3.73023	-2.55266	-1.352	0.218273	652	Cre03.g199150.t1.2	NA	PTHR12126//PTHR12126:SF1 - NADH-UBIQUINONE OXIDOREDUCTASE 39 KDA SUBUNIT-RELATED // SUBFAMILY NOT NAMED (1 of 1)									FALSE	TRUE		Cre11.g468371	Cre17.g742350
Cre12.g500850	0.0296073	0.0256478	0.0986225	0.0277937	-2.55107	-1.3511	0.32294	798	Cre12.g500850.t1.1	NA	NA									TRUE	FALSE		Cre17.g730650	Cre01.g053900
Cre09.g414300	1.44777	0.438666	4.5809	1.32399	-2.55054	-1.3508	0.151623	568	Cre09.g414300.t1.2	NA	NA									FALSE	TRUE		Cre07.g352400	Cre10.g448350
Cre03.g161150	5.4118	1.25758	19.2221	12.3022	-2.55012	-1.35057	0.145168	561	Cre03.g161150.t1.1	NA	PF12499 - Pherophorin (DUF3707) (1 of 70)									FALSE	TRUE		Cre16.g675400	Cre17.g706050
Cre08.g381600	0.0196297	0.0339996	0.171415	0.175779	-2.54958	-1.35026	0.318357	789	Cre08.g381600.t1.2	NA	PTHR31867:SF1 - EXPANSIN-A1-RELATED (1 of 11)									FALSE	FALSE		Cre01.g019850	Cre06.g291400
Cre12.g530550	0.410712	0.140936	1.53442	1.00402	-2.5454	-1.34789	0.249688	692	Cre12.g530550.t1.1	KDG2	Diacylglycerol kinase									FALSE	FALSE		Cre02.g142000	Cre08.g361984
Cre08.g377200	1.04347	0.672056	3.2485	1.66391	-2.54524	-1.3478	0.154889	576	Cre08.g377200.t1.1	NA	K11643 - chromodomain-helicase-DNA-binding protein 4 (CHD4, MI2B) (1 of 1)									FALSE	FALSE		Cre17.g731750	Cre02.g092850
Cre16.g648250	0.790222	0.598293	2.13672	0.542867	-2.54197	-1.34595	0.19674	633	Cre16.g648250.t1.1	NA	NA									FALSE	TRUE		Cre09.g389208	Cre11.g467673
Cre12.g537350	0.166449	0.218758	0.443403	0.223429	-2.54115	-1.34548	0.317121	787	Cre12.g537350.t1.1/Cre12.g537350.t2.1	NA	NA									FALSE	FALSE		Cre11.g467644	Cre01.g041800
Cre02.g075750	0.345784	0.152258	1.02708	0.326686	-2.5386	-1.34403	0.262564	713	Cre02.g075750.t1.1	NA	PF00646 - F-box domain (F-box) (1 of 12)									FALSE	FALSE		Cre10.g419443	Cre10.g433550
Cre33.g758997	0	0	0.0828238	0.0718772	-2.53803	-1.34371	0.303644	773	Cre33.g758997.t1.1	NA	PTHR22993//PTHR22993:SF18 - FORMAMIDOPYRIMIDINE-DNA GLYCOSYLASE // SUBFAMILY NOT NAMED (1 of 2)									FALSE	FALSE		Cre03.g173700	Cre04.g228700
Cre14.g631950	0	0	0.0986612	0.0856214	-2.53803	-1.34371	0.312123	781	Cre14.g631950.t1.2	NA	PTHR31867:SF1 - EXPANSIN-A1-RELATED (1 of 11)									FALSE	FALSE		Cre17.g712500	Cre13.g604550
Cre04.g214800	0.204604	0.0867746	0.939639	0.820995	-2.53709	-1.34318	0.257183	711	Cre04.g214800.t1.2	NA	Endosomal R-SNARE protein, VAMP-like family (R.III)									FALSE	FALSE		Cre01.g030150	Cre05.g243802
Cre12.g543400	0.265329	0.118755	1.04863	0.797133	-2.53367	-1.34123	0.289812	753	Cre12.g543400.t1.2	FDH1	Formaldehyde dehydrogenase									FALSE	FALSE		Cre02.g088200	Cre10.g435850
Cre12.g523400	0.104946	0.119181	0.384931	0.263918	-2.53327	-1.341	0.294521	759	Cre12.g523400.t1.1	NA	NA									FALSE	FALSE		Cre01.g015500	Cre14.g627050
Cre07.g346525	0.210299	0.026162	0.848902	0.527521	-2.53274	-1.3407	0.341475	840	Cre07.g346525.t1.1	NA	NA									FALSE	FALSE		Cre03.g156100	Cre13.g604050
Cre02.g141701	0.569659	0.291272	1.72207	0.62782	-2.53257	-1.3406	0.232861	675	Cre02.g141701.t1.1	NA	NA									FALSE	TRUE		Cre17.g705400	Cre15.g635350
Cre16.g652250	3.46005	2.39656	11.9518	9.16623	-2.53182	-1.34017	0.205884	648	Cre16.g652250.t1.2	NA	NA									FALSE	TRUE		Cre16.g675350	Cre04.g223500
Cre10.g463250	0.413279	0.240187	1.32103	0.643712	-2.53166	-1.34008	0.194704	637	Cre10.g463250.t1.1	NA	NA									TRUE	FALSE		Cre16.g684700	Cre03.g152326
Cre03.g166350	0.814882	0.423651	2.65345	1.55539	-2.53131	-1.33988	0.245817	702	Cre03.g166350.t1.1	NA	NA									FALSE	FALSE		Cre03.g145227	Cre07.g321350
Cre07.g341250	0.0494513	0.061298	0.138379	0.0545751	-2.53088	-1.33964	0.316486	794	Cre07.g341250.t1.2	NA	NA									FALSE	FALSE		Cre03.g144967	Cre07.g335750
Cre02.g101850	0.912289	0.132325	3.66536	2.92251	-2.53054	-1.33944	0.242918	696	Cre02.g101850.t1.2	NA	PTHR23091:SF46 - N-ALPHA-ACETYLTRANSFERASE 50 (1 of 1)									FALSE	FALSE		Cre07.g331000	Cre17.g733150
Cre09.g397105	0.35463	0.237969	1.03679	0.369814	-2.53041	-1.33937	0.26818	727	Cre09.g397105.t1.1	NA	KOG0157//KOG0158 - Cytochrome P450 CYP4/CYP19/CYP26 subfamilies // Cytochrome P450 CYP3/CYP5/CYP6/CYP9 subfamilies (1 of 3)									FALSE	FALSE		Cre03.g200400	Cre11.g475750
Cre16.g665300	2.02508	0.679827	6.19178	2.00979	-2.52887	-1.33849	0.126577	545	Cre16.g665300.t1.2	NA	PTHR24006:SF329 - UBIQUITIN CARBOXYL-TERMINAL HYDROLASE 44 (1 of 1)									FALSE	FALSE		Cre17.g716950	Cre16.g678750
Cre10.g458350	3.6766	1.19199	11.7455	5.22955	-2.52871	-1.3384	0.124235	539	Cre10.g458350.t1.1/Cre10.g458350.t2.1/Cre10.g458350.t3.1	NA	Chitinase-like hydrolase									FALSE	TRUE		Cre02.g080350	Cre05.g233550
Cre07.g331750	1.30235	0.25516	4.02807	1.33183	-2.52761	-1.33777	0.155141	588	Cre07.g331750.t1.2	NA	PF12680 - SnoaL-like domain (SnoaL_2) (1 of 8)									FALSE	FALSE		Cre03.g181500	Cre01.g001750
Cre03.g156350	0.735539	0.50986	2.20656	0.96631	-2.52577	-1.33672	0.340159	841	Cre03.g156350.t1.2	NA	PTHR21228 - FAST LEU-RICH DOMAIN-CONTAINING (1 of 85)									TRUE	FALSE		Cre07.g334450	Cre06.g250300
Cre02.g090600	1.47825	1.28267	3.88631	1.14661	-2.52544	-1.33654	0.176284	615	Cre02.g090600.t1.2	NA	PTHR22652 - NUCLEOPORIN NUP43 (1 of 1)									FALSE	TRUE		Cre12.g508644	Cre09.g416300
Cre15.g635100	0.874319	0.217024	3.33219	2.55908	-2.52349	-1.33542	0.228574	672	Cre15.g635100.t1.2	NA	PF06203 - CCT motif (CCT) (1 of 8)									FALSE	FALSE		Cre01.g033300	Cre06.g249950
Cre10.g448450	0.101336	0.0877841	0.283194	0.0469918	-2.52287	-1.33506	0.345244	853	Cre10.g448450.t1.1	XUV2	Xanthine/uracil/vitamin C permease-like									FALSE	FALSE		Cre10.g460300	Cre08.g380763
Cre11.g478025	0.0714288	0.0618762	0.195368	0.014589	-2.51981	-1.33332	0.321044	810	Cre11.g478025.t1.1	NA	NA									FALSE	FALSE		Cre13.g586200	Cre12.g519500
Cre04.g213250	1.67858	0.628843	5.14901	2.09221	-2.51843	-1.33253	0.149889	584	Cre04.g213250.t1.2	NA	3.4.11.14 - Cytosol alanyl aminopeptidase / Soluble alanyl aminopeptidase (1 of 4)									TRUE	FALSE		Cre09.g413150	Cre06.g278700
Cre03.g206350	1.83669	0.789868	5.59824	1.94148	-2.51823	-1.33241	0.144906	580	Cre03.g206350.t1.1	NA	PTHR21228 - FAST LEU-RICH DOMAIN-CONTAINING (1 of 85)									FALSE	FALSE		Cre09.g406950	Cre14.g611450
Cre02.g095550	0.184676	0.0180316	0.678105	0.475193	-2.51809	-1.33233	0.16088	602	Cre02.g095550.t1.1	NA	PF00092//PF07728//PF13768 - von Willebrand factor type A domain (VWA) // AAA domain (dynein-related subfamily) (AAA_5) // von Willebrand factor type A domain (VWA_3) (1 of 1)									FALSE	TRUE		Cre16.g681014	Cre07.g333450
Cre02.g092400	4.17642	3.68668	11.1715	6.07981	-2.5179	-1.33222	0.204053	654	Cre02.g092400.t1.1	NA	PTHR10693 - RAS GTPASE-ACTIVATING PROTEIN-BINDING PROTEIN (1 of 1)									TRUE	FALSE		Cre03.g171200	Cre07.g348750
Cre02.g095066	0.0523779	0.0476788	0.166371	0.0838337	-2.51726	-1.33185	0.315049	802	Cre02.g095066.t1.1	NA	NA									FALSE	FALSE		Cre12.g544109	Cre04.g225200
Cre09.g386500	0.345366	0.300014	0.760994	0.494761	-2.51631	-1.33131	0.332459	836	Cre09.g386500.t1.2	NA	NA									FALSE	FALSE		Cre06.g262350	Cre09.g392356
Cre03.g198450	0.289364	0.201533	0.786528	0.247703	-2.51505	-1.33059	0.3097	792	Cre03.g198450.t1.2	NA	NA									TRUE	FALSE		Cre14.g620350	Cre14.g611100
Cre17.g710600	0.0442035	0.0446071	0.116707	0.0550093	-2.5142	-1.3301	0.291285	767	Cre17.g710600.t1.2	NA	2.7.11.25 - Mitogen-activated protein kinase kinase kinase / MLTK (1 of 105)									FALSE	TRUE		Cre17.g706950	Cre02.g115508
Cre12.g542850	2.52865	0.842798	8.17807	3.59078	-2.51335	-1.32961	0.0827005	482	Cre12.g542850.t1.2	ARD1	Aci-reductone dioxygenase									TRUE	FALSE		Cre16.g651350	Cre03.g210065
Cre02.g111000	3.05818	1.25375	10.4815	6.26624	-2.51281	-1.3293	0.142724	581	Cre02.g111000.t1.2	CGL9	Putative ER protein									FALSE	TRUE		Cre06.g305750	Cre16.g678997
Cre12.g524550	0.127774	0.110686	0.631238	0.452219	-2.51271	-1.32924	0.329711	833	Cre12.g524550.t1.1	NA	PTHR14614//PTHR14614:SF3 - HEPATOCELLULAR CARCINOMA-ASSOCIATED ANTIGEN // SUBFAMILY NOT NAMED (1 of 2)									FALSE	FALSE		Cre06.g278157	Cre06.g289650
Cre01.g045600	2.5424	0.729128	8.4276	4.21957	-2.51025	-1.32783	0.25065	716	Cre01.g045600.t1.1	SRR12	Speract/scavenger receptor, transmembrane glycoprotein									TRUE	FALSE		Cre06.g282750	Cre17.g739350
Cre17.g699950	0.0640604	0.0393754	0.309574	0.266406	-2.50954	-1.32743	0.274015	745	Cre17.g699950.t1.1	NA	NA									FALSE	FALSE		Cre01.g038450	Cre13.g561850
Cre09.g395550	0.530955	0.314498	1.46251	0.320504	-2.50842	-1.32678	0.285657	760	Cre09.g395550.t1.1	NA	PF05991 - YacP-like NYN domain (NYN_YacP) (1 of 1)									FALSE	FALSE		Cre05.g239978	Cre01.g024550
Cre17.g741000	14.2098	9.137	40.6117	17.1123	-2.50801	-1.32654	0.124368	558	Cre17.g741000.t1.2	NA	K13249 - translocon-associated protein subunit alpha (SSR1) (1 of 1)									TRUE	FALSE		Cre09.g389100	Cre05.g244250
Cre10.g450950	0.195751	0.120099	0.601765	0.188586	-2.50745	-1.32622	0.322614	826	Cre10.g450950.t1.2	NA	NA									FALSE	FALSE		Cre01.g004300	Cre01.g024250
Cre16.g669127	0.0260341	0.0450924	0.0955544	0.0828099	-2.50722	-1.32609	0.365599	895	Cre16.g669127.t1.1/Cre16.g669127.t2.1/Cre16.g669127.t3.1	NA	NA									FALSE	FALSE		Cre03.g204400	Cre01.g051250
Cre12.g547050	0.710414	0.262954	2.29647	0.93232	-2.50707	-1.326	0.225126	680	Cre12.g547050.t1.2	NA	NA									FALSE	FALSE		Cre06.g269350	Cre10.g435250
Cre01.g045902	1.03658	0.668258	3.56538	2.47873	-2.50689	-1.3259	0.287531	765	Cre01.g045902.t1.1	NA	PTHR23264:SF29 - PROTEIN HIGH CHLOROPHYLL FLUORESCENCE 101 (1 of 1)									FALSE	FALSE		Cre13.g585100	Cre10.g426050
Cre09.g410800	0.193773	0.101787	0.620515	0.19542	-2.50634	-1.32558	0.282334	758	Cre09.g410800.t1.2	NRT2.2	High affinity nitrate transporter									FALSE	TRUE		Cre15.g641400	Cre17.g701000
Cre07.g330100	3.83105	1.95589	12.393	6.69308	-2.50567	-1.32519	0.170652	620	Cre07.g330100.t1.2	GTR25	Oligsaccharyl transferase STT3 subunit									FALSE	FALSE		Cre13.g582350	Cre12.g489250
Cre03.g161301	0.135134	0.173239	0.282417	0.224372	-2.50384	-1.32414	0.347119	870	Cre03.g161301.t1.1	NA	NA									FALSE	FALSE		Cre01.g003100	Cre01.g069837
Cre20.g751797	0.16321	0.225402	0.400391	0.366938	-2.5037	-1.32406	0.374548	920	Cre20.g751797.t1.1	NA	NA									FALSE	FALSE		Cre16.g692300	Cre17.g706450
Cre10.g431000	0.0694814	0.0802951	0.493146	0.71593	-2.5037	-1.32406	0.355662	885	Cre10.g431000.t1.1	NA	NA									FALSE	TRUE		Cre16.g682725	Cre06.g277400
Cre08.g368100	0.167717	0.122518	0.481561	0.204224	-2.50105	-1.32253	0.282576	761	Cre08.g368100.t1.1	NA	NA									FALSE	FALSE		Cre01.g032139	Cre12.g547850
Cre16.g673300	0.409448	0.278249	1.4583	1.05434	-2.49937	-1.32156	0.301625	793	Cre16.g673300.t1.2	NA	NA									FALSE	FALSE		Cre06.g267850	Cre03.g176325
Cre08.g371150	0.203682	0.352787	0.44452	0.276585	-2.49886	-1.32127	0.361827	892	Cre08.g371150.t1.2	NA	NA									FALSE	FALSE		Cre09.g396400	Cre16.g675630
Cre02.g145451	0.990935	0.438233	3.05794	1.17429	-2.49653	-1.31992	0.283409	764	Cre02.g145451.t1.2	NA	NA									FALSE	FALSE		Cre02.g093500	Cre01.g004157
Cre12.g524300	2.63824	0.699923	9.08272	4.90415	-2.49308	-1.31793	0.173122	630	Cre12.g524300.t1.2	CGL71	Predicted protein									FALSE	TRUE		Cre03.g191050	Cre13.g607750
Cre09.g407600	0.704396	0.224324	2.51414	1.51793	-2.49093	-1.31668	0.286218	769	Cre09.g407600.t1.2	NA	PTHR20858:SF18 - PROTEIN PET18 (1 of 1)									FALSE	TRUE		Cre12.g522100	Cre07.g327300
Cre11.g481951	1.25964	0.387169	3.91609	1.5839	-2.48885	-1.31548	0.281815	763	Cre11.g481951.t1.1	NA	NA									FALSE	TRUE		Cre16.g670750	Cre09.g410250
Cre02.g080250	3.25003	1.10594	10.5271	5.83105	-2.48861	-1.31534	0.187089	646	Cre02.g080250.t1.2	NA	PF02325 - YGGT family (YGGT) (1 of 4)									FALSE	TRUE		Cre02.g076100	Cre07.g337582
Cre05.g243358	0.0409247	0.0708836	0.307905	0.344269	-2.48814	-1.31507	0.387484	954	Cre05.g243358.t1.1	NA	NA									TRUE	FALSE		Cre17.g697600	Cre13.g586350
Cre16.g677429	0.0168868	0.0292487	0.0741501	0.0338895	-2.48779	-1.31486	0.34363	871	Cre16.g677429.t1.1	NA	NA									FALSE	FALSE		Cre02.g087551	Cre10.g431950
Cre02.g097550	0.787226	0.405796	2.25005	0.787162	-2.48684	-1.31432	0.21648	684	Cre02.g097550.t1.2	NA	PTHR12532:SF0 - TRANSCRIPTIONAL REGULATORY PROTEIN HAH1-RELATED (1 of 1)									FALSE	FALSE		Cre12.g541750	Cre02.g109200
Cre01.g072027	0.0744733	0.0912907	0.200719	0.121865	-2.48605	-1.31385	0.365996	916	Cre01.g072027.t1.1	NA	PF03372 - Endonuclease/Exonuclease/phosphatase family (Exo_endo_phos) (1 of 51)									FALSE	FALSE		Cre02.g095200	Cre12.g490800
Cre01.g026200	0.607322	0.305648	1.87285	0.595083	-2.48581	-1.31372	0.223796	701	Cre01.g026200.t1.2	PPR9	Pentatrichopeptide repeat protein									FALSE	FALSE		Cre04.g222850	Cre11.g474800
Cre16.g658650	3.09636	0.733471	10.3595	5.45575	-2.48537	-1.31346	0.141129	598	Cre16.g658650.t1.1	MYO1	Myosin heavy chain, class XI									TRUE	FALSE		Cre01.g018600	Cre05.g239000
Cre12.g555550	1.81631	0.870828	6.07581	3.66129	-2.48522	-1.31338	0.190066	657	Cre12.g555550.t1.2	NA	K05768 - gelsolin (GSN) (1 of 1)									FALSE	TRUE		Cre06.g262850	Cre07.g348500
Cre12.g536301	0	0	0.203938	0.353232	-2.48217	-1.3116	0.379187	945	Cre12.g536301.t1.1	NA	NA									FALSE	FALSE		Cre08.g382515	Cre08.g366950
Cre01.g020223	0.556598	0.102991	1.95097	1.1086	-2.4816	-1.31127	0.1937	664	Cre01.g020223.t1.1	NA	K01679 - fumarate hydratase, class II (E4.2.1.2B, fumC) (1 of 1)									TRUE	FALSE		Cre10.g439900	Cre16.g675600
Cre09.g397350	0.123169	0.118006	0.263867	0.089023	-2.48087	-1.31084	0.323367	847	Cre09.g397350.t1.1	NA	K15362 - fanconi anemia group J protein (BRIP1, BACH1, FANCJ) (1 of 1)									FALSE	FALSE		Cre16.g674700	Cre04.g213350
Cre01.g036350	0.0852808	0.018296	0.319858	0.191816	-2.48084	-1.31083	0.257029	741	Cre01.g036350.t1.1	NA	K01537 - Ca2+-transporting ATPase (E3.6.3.8) (1 of 5)									FALSE	FALSE		Cre09.g412300	Cre04.g217954
Cre03.g194350	12.4822	9.28603	35.3687	15.9185	-2.47929	-1.30993	0.153136	614	Cre03.g194350.t1.2	NA	NA									TRUE	FALSE		Cre08.g377600	Cre12.g495250
Cre05.g241150	0.514788	0.341114	1.39783	0.430623	-2.47609	-1.30806	0.20128	674	Cre05.g241150.t1.1	NA	K11491 - condensin-2 complex subunit D3 (NCAPD3) (1 of 1)									FALSE	FALSE		Cre12.g541300	Cre10.g460400
Cre01.g010296	0.112195	0.10469	0.738739	0.969981	-2.47429	-1.30702	0.365026	926	Cre01.g010296.t1.1	NA	NA									FALSE	FALSE		Cre09.g399030	Cre13.g566000
Cre03.g207937	0.326741	0.250505	0.884997	0.24749	-2.47349	-1.30655	0.402576	997	Cre03.g207937.t1.1	NA	NA									FALSE	FALSE		Cre07.g312500	Cre02.g141350
Cre01.g025767	0.440527	0.0569594	1.40537	0.574782	-2.47141	-1.30534	0.158652	629	Cre01.g025767.t1.2	NA	PF08457 - Sfi1 spindle body protein (Sfi1) (1 of 2)									FALSE	FALSE		Cre08.g377800	Cre01.g003200
Cre09.g401301	1.26356	0.255114	4.60531	2.87344	-2.46409	-1.30106	0.275849	771	Cre09.g401301.t1.1	NA	NA									TRUE	FALSE		Cre04.g216650	Cre06.g272200
Cre07.g346850	0.0344579	0.0596828	0.162846	0.197233	-2.4629	-1.30036	0.394431	986	Cre07.g346850.t1.2	NA	NA									FALSE	TRUE		Cre14.g625600	Cre09.g414650
Cre06.g263357	0.0547541	0.0582775	0.157558	0.0669167	-2.46124	-1.29939	0.281218	779	Cre06.g263357.t1.2	NA	NA									FALSE	FALSE		Cre13.g588150	Cre02.g110950
Cre06.g260050	0.668181	0.196683	1.95859	0.575908	-2.45929	-1.29824	0.246476	739	Cre06.g260050.t1.2	NA	NA									FALSE	TRUE		Cre13.g586450	Cre07.g316900
Cre11.g480650	0.313394	0.269811	1.14358	1.04511	-2.45905	-1.2981	0.300235	823	Cre11.g480650.t1.2	NA	1.1.1.300 - NADP-retinol dehydrogenase / Retinol dehydrogenase (NADP(+)) (1 of 11)									FALSE	FALSE		Cre10.g457900	Cre12.g536950
Cre14.g615850	0.698921	0.465038	1.9493	0.377585	-2.45869	-1.29789	0.255149	755	Cre14.g615850.t1.1/Cre14.g615850.t2.1	NA	KOG0027 - Calmodulin and related proteins (EF-Hand superfamily) (1 of 31)									FALSE	FALSE		Cre13.g567850	Cre06.g297850
Cre12.g490550	0.165063	0.117789	0.522688	0.203962	-2.45816	-1.29758	0.299368	820	Cre12.g490550.t1.1	NA	NA									FALSE	FALSE		Cre14.g618150	Cre17.g704400
Cre17.g734805	0.0921908	0.0836	0.313904	0.212349	-2.45569	-1.29613	0.318046	851	Cre17.g734805.t1.1/Cre17.g734805.t2.1	NA	2.7.11.1 - Non-specific serine/threonine protein kinase / Threonine-specific protein kinase (1 of 543)									FALSE	FALSE		Cre09.g388150	Cre09.g395658
Cre03.g165350	2.40267	2.34998	6.12798	2.97367	-2.45538	-1.29595	0.243065	743	Cre03.g165350.t1.1	NA	1.1.1.30 - 3-hydroxybutyrate dehydrogenase / D-beta-hydroxybutyrate dehydrogenase (1 of 3)									FALSE	FALSE		Cre08.g358548	Cre10.g463200
Cre03.g166900	0.0302592	0.026571	0.133462	0.0868461	-2.45538	-1.29594	0.354854	923	Cre03.g166900.t1.1/Cre03.g166900.t2.1	NA	Cytochrome P450, CYP4 superfamily									FALSE	FALSE		Cre02.g102000	Cre02.g101050
Cre10.g455190	0.293843	0.206848	0.998383	0.77115	-2.45392	-1.29509	0.275507	778	Cre10.g455190.t1.1	NA	PF04989 - Cephalosporin hydroxylase (CmcI) (1 of 1)									FALSE	FALSE		Cre07.g312580	Cre02.g141606
Cre06.g270150	1.29005	0.600388	3.91741	1.60548	-2.45381	-1.29502	0.200959	693	Cre06.g270150.t1.1	NA	Mitochondrial substrate carrier protein									FALSE	FALSE		Cre10.g446650	Cre17.g743847
Cre16.g663050	0.883276	0.408694	2.53563	0.804684	-2.45302	-1.29456	0.206959	709	Cre16.g663050.t1.1	NA	PTHR10751:SF38 - GUANYLATE-BINDING FAMILY PROTEIN (1 of 1)									FALSE	FALSE		Cre03.g206929	Cre01.g028850
Cre12.g522050	2.62305	1.23295	7.28116	1.30867	-2.45286	-1.29446	0.193864	678	Cre12.g522050.t1.2	NA	PTHR11851//PTHR11851:SF140 - METALLOPROTEASE // SUBFAMILY NOT NAMED (1 of 1)									TRUE	FALSE		Cre03.g156000	Cre11.g467683
Cre06.g255650	0.173821	0.155127	0.456132	0.343975	-2.4525	-1.29425	0.359129	930	Cre06.g255650.t1.1	NA	EZY1-like protein									FALSE	FALSE		Cre16.g693700	Cre08.g377550
Cre16.g658250	0.0908907	0.157427	0.242499	0.21045	-2.45244	-1.29422	0.368445	951	Cre16.g658250.t1.1/Cre16.g658250.t2.1	NA	NA									FALSE	FALSE		Cre02.g099150	Cre09.g411500
Cre06.g252850	9.55737	5.37036	27.9362	11.4035	-2.45027	-1.29294	0.121217	594	Cre06.g252850.t1.2/Cre06.g252850.t2.1	NA	NA									FALSE	FALSE		Cre12.g524200	Cre06.g277350
Cre03.g200351	0	0	0.0668975	0.0852597	-2.44921	-1.29232	0.374572	959	Cre03.g200351.t1.1	NA	NA									TRUE	FALSE		Cre14.g620250	Cre11.g469600
Cre30.g758297	0	0	0.200341	0.255332	-2.44921	-1.29232	0.36693	950	Cre30.g758297.t1.1	NA	NA									FALSE	FALSE		Cre12.g545700	Cre03.g154700
Cre07.g322376	0	0	0.363835	0.463702	-2.44921	-1.29232	0.373866	956	Cre07.g322376.t1.1	NA	NA									TRUE	FALSE		Cre09.g412850	Cre06.g290250
Cre10.g449750	0.130642	0.0554693	0.421089	0.229777	-2.44901	-1.2922	0.232444	734	Cre10.g449750.t1.1	NA	PTHR11712:SF234 - V(2)K05816, ISOFORM B (1 of 1)									FALSE	FALSE		Cre03.g195500	Cre18.g749197
Cre02.g091150	6.68777	4.06351	19.1194	7.17015	-2.44875	-1.29204	0.121844	601	Cre02.g091150.t1.1	SEC24A	COP-II coat subunit									TRUE	FALSE		Cre13.g569200	Cre17.g714150
Cre09.g406448	0.0567801	0.0500614	0.271289	0.191883	-2.44807	-1.29165	0.493456	1168	Cre09.g406448.t1.1	NA	NA									FALSE	FALSE		Cre10.g435050	Cre16.g676537
Cre11.g476950	0.582409	0.322266	1.87525	1.14606	-2.4464	-1.29066	0.261816	772	Cre11.g476950.t1.1	NA	NA									FALSE	TRUE		Cre08.g362250	Cre17.g717100
Cre06.g258850	1.41046	0.27665	4.94247	2.9694	-2.44607	-1.29047	0.243065	750	Cre06.g258850.t1.2	NA	PF04232 - Stage V sporulation protein S (SpoVS) (SpoVS) (1 of 4)									TRUE	FALSE		Cre10.g427700	Cre03.g157200
Cre09.g402050	0.0871173	0.0630772	0.213508	0.0827458	-2.44441	-1.28949	0.319438	868	Cre09.g402050.t1.1	NA	NA									TRUE	FALSE		Cre06.g280050	Cre14.g629700
Cre09.g409728	0.114833	0.0479345	0.398952	0.127378	-2.4412	-1.28759	0.333798	889	Cre09.g409728.t1.2	NA	NA									FALSE	FALSE		Cre11.g467567	Cre17.g699500
Cre17.g745997	0.189421	0.236701	0.503815	0.336174	-2.43946	-1.28656	0.36533	952	Cre17.g745997.t1.1	NA	2.7.11.1 - Non-specific serine/threonine protein kinase / Threonine-specific protein kinase (1 of 543)									FALSE	TRUE		Cre06.g278350	Cre10.g444450
Cre12.g506750	1.13541	0.553129	4.15312	3.34996	-2.43757	-1.28545	0.267353	780	Cre12.g506750.t1.1	NA	PF12499 - Pherophorin (DUF3707) (1 of 70)									FALSE	FALSE		Cre01.g032050	Cre07.g325733
Cre11.g478700	13.5475	4.50483	41.3053	19.1517	-2.43336	-1.28295	0.150671	641	Cre11.g478700.t1.2	NA	Peptidyl-prolyl cis-trans isomerase, FKBP-type									FALSE	FALSE		Cre06.g272100	Cre08.g368226
Cre12.g515301	0.0947337	0.0547303	0.273664	0.0285193	-2.43247	-1.28242	0.32426	877	Cre12.g515301.t1.1	NA	PF13515 - Fusaric acid resistance protein-like (FUSC_2) (1 of 4)									TRUE	FALSE		Cre09.g391875	Cre17.g697000
Cre06.g290550	0.0315728	0.0336045	0.102943	0.0743507	-2.43012	-1.28103	0.397287	1010	Cre06.g290550.t1.1	NA	PTHR23213//PTHR23213:SF243 - FORMIN-RELATED // SUBFAMILY NOT NAMED (1 of 1)									FALSE	FALSE		Cre02.g080650	Cre12.g488550
Cre16.g696000	3.00306	1.61693	9.07892	4.32005	-2.42955	-1.28069	0.167573	665	Cre16.g696000.t1.2	NA	2.7.7.23 - UDP-N-acetylglucosamine diphosphorylase / UDP-N-acetylglucosamine pyrophosphorylase (1 of 2)									FALSE	FALSE		Cre06.g295650	Cre03.g145127
Cre16.g679669	0.394057	0.230154	1.29605	0.659556	-2.427	-1.27917	0.279653	804	Cre16.g679669.t1.1	CMS1	4-diphosphocytidyl-2C-methyl-D-erythritol synthase, chloroplast precursor									FALSE	FALSE		Cre02.g110350	Cre03.g156900
Cre09.g393250	0.248664	0.0804472	1.01823	0.750387	-2.42633	-1.27877	0.385898	993	Cre09.g393250.t1.1	NA	K14347 - solute carrier family 10 (sodium/bile acid cotransporter), member 7 (SLC10A7, P7) (1 of 5)									TRUE	FALSE		Cre17.g707100	Cre40.g760147
Cre06.g286250	3.54107	1.17836	10.9662	4.85578	-2.42556	-1.27832	0.204169	715	Cre06.g286250.t1.2	NA	Mitochondrial substrate carrier protein									FALSE	TRUE		Cre06.g278212	Cre02.g089311
Cre12.g515400	0.422339	0.116267	1.5457	1.09409	-2.42532	-1.27817	0.293912	832	Cre12.g515400.t1.1	NA	PF08016 - Polycystin cation channel (PKD_channel) (1 of 17)									FALSE	FALSE		Cre12.g524150	Cre08.g373200
Cre06.g310850	0.557768	0.104624	1.7603	0.494823	-2.42498	-1.27797	0.249003	762	Cre06.g310850.t1.2	NA	PF00005 - ABC transporter (ABC_tran) (1 of 79)									FALSE	FALSE		Cre01.g033350	Cre17.g733250
Cre05.g231000	1.8492	1.09954	5.85574	3.57544	-2.42252	-1.27651	0.216559	729	Cre05.g231000.t1.2	NA	NA									FALSE	TRUE		Cre03.g171350	Cre14.g632750
Cre13.g578100	1.37551	0.678973	4.00199	1.81855	-2.42227	-1.27636	0.207737	722	Cre13.g578100.t1.1	NA	K14310 - nuclear pore complex protein Nup205 (NUP205, NUP192) (1 of 1)									FALSE	FALSE		Cre03.g153300	Cre13.g576200
Cre06.g288100	0.737332	0.26371	2.17847	0.58519	-2.4219	-1.27614	0.19433	707	Cre06.g288100.t1.2	NA	PTHR12829//PTHR12829:SF1 - N6-ADENOSINE-METHYLTRANSFERASE // SUBFAMILY NOT NAMED (1 of 1)									FALSE	FALSE		Cre03.g194350	Cre11.g467687
Cre02.g076200	0.611803	0.297898	2.0134	1.26043	-2.42053	-1.27532	0.257364	777	Cre02.g076200.t1.1	NA	K08776 - puromycin-sensitive aminopeptidase [EC:3.4.11.-] (NPEPPS) (1 of 1)									FALSE	FALSE		Cre04.g213400	Cre08.g363700
Cre12.g492750	0.83691	0.330522	2.43497	0.804747	-2.4197	-1.27483	0.192384	705	Cre12.g492750.t1.1	NA	3.2.1.1 - Alpha-amylase / Glycogenase (1 of 5)									FALSE	TRUE		Cre12.g518950	Cre09.g416900
Cre11.g467662	0.50735	0.17988	1.57177	0.697349	-2.41913	-1.27449	0.209427	726	Cre11.g467662.t1.1	NA	NA									FALSE	FALSE		Cre06.g261550	Cre14.g629840
Cre16.g693500	31.6159	15.9822	89.0031	33.8857	-2.41763	-1.27359	0.117073	605	Cre16.g693500.t1.1	NA	Hydroxyproline-rich cell wall protein									FALSE	TRUE		Cre08.g370850	Cre02.g087000
Cre10.g459050	0.409905	0.0928756	1.35843	0.743544	-2.41362	-1.2712	0.294404	839	Cre10.g459050.t1.1	NA	3.4.21.83 - Oligopeptidase B / Protease II (1 of 4)									FALSE	TRUE		Cre06.g256400	Cre06.g251200
Cre03.g145667	0.14143	0.130551	0.492062	0.363627	-2.41356	-1.27116	0.428729	1082	Cre03.g145667.t1.1	NA	PTHR13060 - SGT1 PROTEIN HSGT1 SUPPRESSOR OF GCR2 (1 of 2)									TRUE	FALSE		Cre06.g299900	Cre11.g467400
Cre12.g519300	2.36729	1.29501	7.74588	5.07459	-2.41242	-1.27048	0.219056	737	Cre12.g519300.t1.2	TEF9	Predicted protein									TRUE	FALSE		Cre06.g279000	Cre11.g476376
Cre02.g085900	2.59018	1.28696	7.00433	2.59026	-2.41237	-1.27045	0.243714	766	Cre02.g085900.t1.2	NA	K01092 - myo-inositol-1(or 4)-monophosphatase (E3.1.3.25, IMPA, suhB) (1 of 2)									FALSE	FALSE		Cre01.g017750	Cre07.g354550
Cre09.g395139	1.54686	0.742501	4.39313	1.11049	-2.41178	-1.2701	0.214116	733	Cre09.g395139.t1.1	NA	PTHR10283:SF21 - ARSENICAL PUMP MEMBRANE PROTEIN (1 of 2)									FALSE	TRUE		Cre12.g554550	Cre11.g475000
Cre13.g572750	3.15727	0.630219	9.44224	3.86346	-2.41149	-1.26992	0.223047	740	Cre13.g572750.t1.1/Cre13.g572750.t2.1/Cre13.g572750.t3.1	AMX3	Copper amine oxidase, amiloride-sensitive									FALSE	FALSE		Cre17.g720350	Cre03.g187700
Cre06.g278151	0.469063	0.411321	0.826767	0.336325	-2.40988	-1.26896	0.397414	1032	Cre06.g278151.t1.1	NA	K10880 - DNA-repair protein XRCC3 (XRCC3) (1 of 1)									FALSE	FALSE		Cre12.g504000	Cre09.g414300
Cre01.g011250	0.304348	0.242339	0.767367	0.34447	-2.40821	-1.26796	0.32684	893	Cre01.g011250.t1.1	NA	2.7.11.1 - Non-specific serine/threonine protein kinase / Threonine-specific protein kinase (1 of 543)									FALSE	FALSE		Cre06.g278205	Cre13.g589200
Cre03.g201439	1.50741	0.71071	4.49063	1.76466	-2.40751	-1.26754	0.228098	747	Cre03.g201439.t1.1	NA	PTHR22778:SF0 - OVARIAN CANCER-ASSOCIATED GENE 2 PROTEIN (1 of 1)									FALSE	FALSE		Cre05.g234300	Cre01.g047600
Cre10.g425675	0.733035	0.555626	1.95972	0.749158	-2.40342	-1.26509	0.2562	783	Cre10.g425675.t1.1	NA	PTHR13003 - NUP107-RELATED (1 of 1)									FALSE	FALSE		Cre03.g154950	Cre02.g115950
Cre09.g398250	0.104967	0.0920452	0.309417	0.227632	-2.4028	-1.26472	0.345954	935	Cre09.g398250.t1.1	NA	NA									FALSE	FALSE		Cre03.g164050	Cre08.g358574
Cre13.g583400	1.22772	0.617837	3.42833	1.0119	-2.40151	-1.26394	0.159448	666	Cre13.g583400.t1.1	NA	NA									FALSE	TRUE		Cre14.g613950	Cre10.g430700
Cre13.g603900	4.68327	3.22609	13.4339	7.02216	-2.39804	-1.26186	0.199834	723	Cre13.g603900.t1.2	NA	K01890 - phenylalanyl-tRNA synthetase beta chain (FARSB, pheT) (1 of 1)									TRUE	FALSE		Cre03.g172322	Cre09.g410100
Cre07.g349850	0.796534	0.651056	2.77435	2.44684	-2.39797	-1.26182	0.329317	907	Cre07.g349850.t1.2	NA	PTHR22844 - F-BOX AND WD40 DOMAIN PROTEIN (1 of 15)									FALSE	FALSE		Cre05.g234649	Cre05.g236907
Cre12.g489650	0.933859	0.517683	2.60754	0.711549	-2.39493	-1.25998	0.297336	854	Cre12.g489650.t1.1	NA	NA									FALSE	TRUE		Cre04.g228925	Cre02.g081800
Cre02.g097800	10.6953	1.50995	31.6552	11.0407	-2.39485	-1.25994	0.132268	640	Cre02.g097800.t1.1	NA	ABC transporter									TRUE	FALSE		Cre01.g018850	Cre04.g217915
Cre17.g706500	0.190142	0.168761	0.378701	0.157699	-2.39249	-1.25851	0.386695	1012	Cre17.g706500.t1.1	NA	NA									FALSE	FALSE		Cre12.g541150	Cre11.g478000
Cre07.g350100	0.524989	0.138249	1.68468	0.908731	-2.38847	-1.25609	0.290166	848	Cre07.g350100.t1.1	NA	PTHR12706 - STRAWBERRY NOTCH-RELATED (1 of 5)									FALSE	TRUE		Cre03.g171550	Cre02.g112000
Cre14.g616589	0.610012	0.527993	1.60703	0.835883	-2.38683	-1.25509	0.332751	922	Cre14.g616589.t1.2	NA	NA									FALSE	TRUE		Cre12.g512100	Cre12.g546600
Cre01.g042502	0.00399031	0.00691143	0.0246729	0.0199747	-2.38627	-1.25476	0.395291	1041	Cre01.g042502.t1.1	NA	PTHR19331//PTHR19331:SF299 - LYSYL OXIDASE-RELATED // SUBFAMILY NOT NAMED (1 of 2)									FALSE	FALSE		Cre10.g438250	Cre02.g146629
Cre01.g015451	1.13398	0.414392	3.31326	1.00745	-2.38545	-1.25426	0.258006	796	Cre01.g015451.t1.1	NA	PTHR10157 - DOPAMINE BETA HYDROXYLASE RELATED (1 of 33)									FALSE	FALSE		Cre08.g367000	Cre05.g232600
Cre03.g167050	0.274644	0.114644	0.916423	0.367059	-2.3853	-1.25417	0.309314	874	Cre03.g167050.t1.1	NA	NA									FALSE	TRUE		Cre04.g217968	Cre12.g554953
Cre02.g088500	0.360183	0.422845	1.00172	0.837278	-2.38275	-1.25262	0.331223	924	Cre02.g088500.t1.1	NA	Conserved expressed protein									FALSE	FALSE		Cre12.g554700	Cre02.g116450
Cre13.g569050	0.98392	0.116613	3.19108	1.68724	-2.38056	-1.2513	0.247612	786	Cre13.g569050.t1.1	NA	NA									TRUE	FALSE		Cre06.g306050	Cre10.g431650
Cre17.g724900	0.471234	0.259531	1.32447	0.419354	-2.38047	-1.25125	0.266262	815	Cre17.g724900.t1.2	NA	NA									FALSE	TRUE		Cre07.g352900	Cre03.g206800
Cre01.g045150	2.09182	0.274751	5.98259	1.64516	-2.38043	-1.25122	0.163243	681	Cre01.g045150.t1.2	NA	PTHR10351:SF42 - LD40663P (1 of 5)									FALSE	FALSE		Cre03.g185800	Cre13.g581200
Cre14.g621501	0.0404301	0.0400675	0.101556	0.0401055	-2.37845	-1.25002	0.363252	978	Cre14.g621501.t1.1/Cre14.g621501.t2.1/Cre14.g621501.t3.1/Cre14.g621501.t4.1	NA	NA									FALSE	FALSE		Cre07.g330950	Cre01.g012950
Cre04.g222350	0.223465	0.0668547	1.05705	0.875417	-2.37626	-1.24869	0.363716	982	Cre04.g222350.t1.1	NA	NA									FALSE	FALSE		Cre12.g549950	Cre17.g727201
Cre09.g390604	0.931126	0.198902	3.38803	2.45259	-2.37545	-1.2482	0.28737	850	Cre09.g390604.t1.1	NA	NA									FALSE	FALSE		Cre02.g086887	Cre14.g610200
Cre02.g078777	0.341208	0.129575	1.30532	1.1927	-2.37476	-1.24778	0.392307	1049	Cre02.g078777.t1.1	NA	PF12499 - Pherophorin (DUF3707) (1 of 70)									FALSE	FALSE		Cre12.g504050	Cre02.g100850
Cre16.g656750	13.4285	9.37113	35.3789	14.8304	-2.37294	-1.24668	0.180297	712	Cre16.g656750.t1.1	NA	PTHR12210:SF70 - AT02326P-RELATED (1 of 2)									TRUE	FALSE		Cre12.g509150	Cre16.g678850
Cre06.g311500	0.985089	0.442919	2.88165	1.14473	-2.36931	-1.24447	0.278521	837	Cre06.g311500.t1.1	NA	NA									FALSE	FALSE		Cre03.g150950	Cre16.g680300
Cre01.g025900	1.73522	0.896816	4.66574	1.04869	-2.36722	-1.24319	0.268951	828	Cre01.g025900.t1.2	NA	PF00415//PF13540 - Regulator of chromosome condensation (RCC1) repeat (RCC1) // Regulator of chromosome condensation (RCC1) repeat (RCC1_2) (1 of 3)									FALSE	TRUE		Cre03.g153306	Cre03.g155250
Cre03.g177850	0.161199	0.11255	0.459713	0.189765	-2.36634	-1.24266	0.324233	919	Cre03.g177850.t1.2	NA	NA									FALSE	FALSE		Cre08.g362300	Cre13.g592200
Cre16.g685400	4.02392	1.46711	12.1479	5.80742	-2.36533	-1.24204	0.259215	812	Cre16.g685400.t1.2	NA	Short-chain dehydrogenase/reductase									FALSE	FALSE		Cre10.g466750	Cre09.g395139
Cre02.g080650	19.0925	11.7182	53.3703	26.7924	-2.36356	-1.24096	0.181912	718	Cre02.g080650.t1.2	HSP90B	Endoplasmic reticulum associated heat shock protein 90B									TRUE	FALSE		Cre16.g675637	Cre03.g202300
Cre10.g429200	0.961318	0.26987	2.71887	0.48865	-2.36197	-1.23999	0.302166	881	Cre10.g429200.t1.1	NA	2.1.1.127 - [Ribulose-bisphosphate carboxylase]-lysine N-methyltransferase / RuBisCO methyltransferase (1 of 5)									FALSE	TRUE		Cre09.g389912	Cre02.g095950
Cre07.g327800	0.0737888	0.0693932	0.20805	0.0510694	-2.36126	-1.23956	0.38101	1020	Cre07.g327800.t1.1	NA	K05681 - ATP-binding cassette, subfamily G (WHITE), member 2 (ABCG2) (1 of 2)									FALSE	FALSE		Cre13.g571520	Cre03.g155150
Cre12.g503800	1.64449	1.09225	4.55695	1.89013	-2.36074	-1.23924	0.251267	803	Cre12.g503800.t1.1	NA	2.1.1.127//2.1.1.259 - [Ribulose-bisphosphate carboxylase]-lysine N-methyltransferase / RuBisCO methyltransferase // [Fructose-bisphosphate aldolase]-lysine N-methyltransferase / (dimerizing)]-lysine 6-N-methyltransferase (1 of 1)									TRUE	FALSE		Cre16.g690350	Cre06.g278209
Cre05.g238450	0.226781	0.129482	0.633048	0.207325	-2.36067	-1.2392	0.304693	886	Cre05.g238450.t1.1	NA	NA									FALSE	FALSE		Cre06.g252650	Cre14.g626634
Cre01.g039600	0.613362	0.563829	1.65356	1.05441	-2.35711	-1.23702	0.299186	876	Cre01.g039600.t1.1	NA	NA									FALSE	FALSE		Cre13.g570400	Cre05.g242200
Cre16.g675000	0.353555	0.200768	1.0166	0.217177	-2.3538	-1.23499	0.316093	906	Cre16.g675000.t1.1	UPS2	Uroporphyrinogen-III synthase									FALSE	FALSE		Cre03.g173250	Cre01.g037550
Cre02.g095141	0.431098	0.0739781	1.63207	1.29018	-2.35283	-1.2344	0.314985	903	Cre02.g095141.t1.1	NA	PF01266//PF01494 - FAD dependent oxidoreductase (DAO) // FAD binding domain (FAD_binding_3) (1 of 1)									FALSE	FALSE		Cre09.g392766	Cre16.g694850
Cre15.g637450	0.361495	0.275505	0.93188	0.294736	-2.35272	-1.23433	0.322902	927	Cre15.g637450.t1.2	NA	NA									FALSE	FALSE		Cre09.g406416	Cre02.g080900
Cre22.g754147	0.137104	0.121687	0.332912	0.103109	-2.3523	-1.23407	0.374795	1017	Cre22.g754147.t1.1	NA	NA									FALSE	FALSE		Cre13.g587050	Cre05.g239550
Cre08.g381250	0.0839832	0.0775234	0.230099	0.122648	-2.35219	-1.23401	0.36284	994	Cre08.g381250.t1.2	NA	NA									FALSE	TRUE		Cre07.g317300	Cre05.g239600
Cre05.g241400	0.790392	0.27219	2.44358	1.24373	-2.35212	-1.23396	0.22622	775	Cre05.g241400.t1.1	NA	1.16.1.7 - Ferric-chelate reductase (NADH) / NADH:Fe(3+)-EDTA reductase (1 of 2)									FALSE	TRUE		Cre12.g495800	Cre06.g271650
Cre11.g467900	0.288649	0.254494	0.967486	1.01061	-2.35089	-1.2332	0.381069	1034	Cre11.g467900.t1.2	NA	PF13578 - Methyltransferase domain (Methyltransf_24) (1 of 7)									FALSE	FALSE		Cre07.g339150	Cre17.g712950
Cre10.g424450	3.75413	3.21727	10.1	5.77792	-2.3497	-1.23248	0.285597	864	Cre10.g424450.t1.2	TOM40	40 kDa translocon at mitochondrial outer envelope membrane									TRUE	FALSE		Cre08.g377700	Cre10.g465650
Cre17.g706350	0.27825	0.194193	0.779997	0.471629	-2.34835	-1.23165	0.340919	958	Cre17.g706350.t1.1	NA	NA									FALSE	FALSE		Cre12.g510500	Cre16.g678900
Cre09.g413850	0.568436	0.27559	1.60959	0.488949	-2.34737	-1.23104	0.398807	1071	Cre09.g413850.t1.2	NA	PTHR12203 - KDEL LYS-ASP-GLU-LEU CONTAINING - RELATED (1 of 83)									FALSE	TRUE		Cre09.g387467	Cre07.g318300
Cre01.g011800	0.639078	0.214939	2.04427	1.21117	-2.34656	-1.23055	0.304804	894	Cre01.g011800.t1.1	NA	KOG0581 - Mitogen-activated protein kinase kinase (MAP2K) (1 of 18)									FALSE	TRUE		Cre03.g151400	Cre06.g268550
Cre03.g144304	0.0949197	0.0118084	0.393082	0.307865	-2.34573	-1.23004	0.347597	973	Cre03.g144304.t1.1	NA	NA									FALSE	FALSE		Cre02.g079550	Cre10.g452800
Cre03.g189400	4.75771	2.6467	14.4725	8.02623	-2.34543	-1.22985	0.251641	816	Cre03.g189400.t1.2	NA	Seryl-tRNA(Sec) synthetase									TRUE	FALSE		Cre09.g401663	Cre03.g181100
Cre02.g095134	0.616458	0.365363	1.57192	0.303326	-2.34524	-1.22973	0.33467	953	Cre02.g095134.t1.1	NA	PF13489 - Methyltransferase domain (Methyltransf_23) (1 of 9)									FALSE	FALSE		Cre06.g280250	Cre16.g678437
Cre10.g425550	0.961959	0.72535	2.64407	1.35115	-2.34472	-1.22941	0.401852	1079	Cre10.g425550.t1.1	NA	PTHR11787:SF4 - RAB PROTEINS GERANYLGERANYLTRANSFERASE COMPONENT A (1 of 1)									TRUE	FALSE		Cre06.g306650	Cre06.g278194
Cre07.g354075	0.471884	0.546058	1.08466	0.302557	-2.34468	-1.22939	0.367654	1006	Cre07.g354075.t1.1	NA	NA									FALSE	FALSE		Cre09.g399915	Cre01.g022666
Cre12.g523650	0.182564	0.158149	0.472117	0.342634	-2.34339	-1.22859	0.368335	1008	Cre12.g523650.t1.2	NA	PTHR12197 - SET AND MYND DOMAIN CONTAINING (1 of 21)									FALSE	FALSE		Cre06.g298850	Cre03.g209281
Cre03.g165550	0.770469	0.671802	1.97165	0.835302	-2.343	-1.22836	0.325387	939	Cre03.g165550.t1.2	NA	2.7.11.1 - Non-specific serine/threonine protein kinase / Threonine-specific protein kinase (1 of 543)									FALSE	FALSE		Cre17.g697406	Cre14.g616550
Cre16.g679051	0.0610528	0.0574159	0.227693	0.21502	-2.34283	-1.22825	0.410631	1090	Cre16.g679051.t1.1	NA	NA									FALSE	FALSE		Cre03.g173200	Cre08.g366800
Cre16.g650050	0.0749428	0.066075	0.244195	0.0405037	-2.34153	-1.22745	0.382921	1053	Cre16.g650050.t1.2	NA	PTHR12231:SF112 - RHODANESE-LIKE DOMAIN-CONTAINING PROTEIN 14, CHLOROPLASTIC (1 of 2)									FALSE	FALSE		Cre12.g535450	Cre07.g354650
Cre06.g291400	1.28749	1.11417	3.05217	1.06781	-2.34081	-1.227	0.322022	931	Cre06.g291400.t1.1	NA	PF00288 - GHMP kinases N terminal domain (GHMP_kinases_N) (1 of 7)									FALSE	TRUE		Cre09.g387650	Cre17.g737400
Cre17.g730516	0.175421	0.0692605	0.484288	0.153171	-2.33972	-1.22634	0.310907	912	Cre17.g730516.t1.1	NA	NA									FALSE	TRUE		Cre06.g293950	Cre14.g634193
Cre02.g083180	0.0616659	0.0617021	0.139688	0.0686038	-2.33679	-1.22453	0.377892	1040	Cre02.g083180.t1.1	NA	NA									FALSE	FALSE		Cre16.g686700	Cre13.g602450
Cre11.g476325	0.0110415	0.0191244	0.072886	0.0766416	-2.33645	-1.22432	0.375863	1036	Cre11.g476325.t1.1	NA	4.1.1.31 - Phosphoenolpyruvate carboxylase / Phosphoenolpyruvic carboxylase (1 of 3)									FALSE	FALSE		Cre17.g723150	Cre13.g579582
Cre03.g192300	0.00518961	0.00898867	0.0342573	0.0360224	-2.33645	-1.22432	0.425542	1116	Cre03.g192300.t1.2	NA	NA									FALSE	FALSE		Cre03.g175451	Cre06.g252150
Cre07.g337800	1.13343	1.04164	2.44623	0.887829	-2.33616	-1.22414	0.347434	984	Cre07.g337800.t1.2	MRPS17	Mitochondrial ribosomal protein S17									FALSE	FALSE		Cre12.g503550	Cre06.g257650
Cre13.g587650	1.29496	0.76199	3.39581	0.892571	-2.33601	-1.22404	0.311182	915	Cre13.g587650.t1.2	NA	NA									FALSE	FALSE		Cre10.g422300	Cre17.g721750
Cre01.g013350	37.2787	20.0499	104.776	52.6028	-2.33377	-1.22266	0.224627	782	Cre01.g013350.t1.2	NA	NA									FALSE	TRUE		Cre06.g307350	Cre07.g353150
Cre01.g022500	0.592502	0.364308	1.581	0.7179	-2.33261	-1.22195	0.290042	880	Cre01.g022500.t1.2	MME5	NADP malic enzyme									TRUE	FALSE		Cre08.g379400	Cre02.g102500
Cre06.g296350	0.515372	0.233519	1.54198	0.875415	-2.33122	-1.22108	0.37062	1022	Cre06.g296350.t1.1	NA	3.4.22.68 - Ulp1 peptidase / Ulp1 protease (1 of 6)									FALSE	FALSE		Cre03.g200000	Cre03.g167250
Cre17.g700300	1.17592	0.725349	3.06456	0.78184	-2.32953	-1.22004	0.277815	866	Cre17.g700300.t1.1	CGL22	Putative microtubule-severing ATPase									FALSE	FALSE		Cre03.g159600	Cre12.g532800
Cre07.g314450	0.437608	0.0914503	1.33728	0.500166	-2.32682	-1.21836	0.345579	980	Cre07.g314450.t1.1	NA	S-adenosyl-L-methionine-dependent methyltransferase									FALSE	FALSE		Cre01.g009350	Cre01.g027950
Cre14.g629050	2.05943	0.969524	5.95425	1.94925	-2.326	-1.21785	0.319224	934	Cre14.g629050.t1.2	NA	PF02298 - Plastocyanin-like domain (Cu_bind_like) (1 of 1)									FALSE	FALSE		Cre13.g590800	Cre16.g671900
Cre06.g296950	0.0195698	0.0210944	0.0680525	0.0697874	-2.32552	-1.21756	0.389323	1067	Cre06.g296950.t1.1	NA	PTHR24098:SF9 - ACYL-COA N-ACYLTRANSFERASE DOMAIN-CONTAINING PROTEIN-RELATED (1 of 1)									FALSE	FALSE		Cre06.g280300	Cre16.g655150
Cre10.g442150	0.19175	0.135569	0.534151	0.122824	-2.32527	-1.2174	0.381121	1057	Cre10.g442150.t1.1	NA	NA									FALSE	FALSE		Cre09.g391901	Cre12.g522400
Cre02.g088200	37.2968	16.0361	111.585	58.1341	-2.32466	-1.21702	0.206998	774	Cre02.g088200.t1.2	NA	Protein disulfide isomerase 1									TRUE	FALSE		Cre06.g276150	Cre52.g761647
Cre01.g002150	0.333216	0.174033	0.954585	0.306985	-2.32276	-1.21584	0.357565	1003	Cre01.g002150.t1.2	NA	NA									FALSE	FALSE		Cre03.g180550	Cre12.g552050
Cre02.g090150	4.109	2.05021	11.5366	4.4785	-2.32258	-1.21573	0.319971	942	Cre02.g090150.t1.2	PAN3	Pantothenate synthetase									FALSE	FALSE		Cre06.g308850	Cre11.g467530
Cre16.g672100	1.13298	0.640319	3.25397	1.55709	-2.32197	-1.21535	0.273239	861	Cre16.g672100.t1.1	NA	NA									FALSE	TRUE		Cre03.g209729	Cre03.g162750
Cre11.g467757	0.625562	0.29085	1.80426	0.781491	-2.32164	-1.21515	0.2371	814	Cre11.g467757.t1.1/Cre11.g467757.t2.1	NA	NA									FALSE	FALSE		Cre06.g286850	Cre14.g610100
Cre17.g697650	3.88575	1.91024	11.0476	4.58611	-2.32099	-1.21474	0.267509	858	Cre17.g697650.t1.1	NA	K01354 - oligopeptidase B (ptrB) (1 of 1)									FALSE	FALSE		Cre04.g232402	Cre10.g422700
Cre11.g475850	3.15585	1.54682	10.0911	6.33777	-2.32095	-1.21471	0.272534	862	Cre11.g475850.t1.2	ZNJ1	DnaJ-like Zinc-finger protein									FALSE	FALSE		Cre03.g166650	Cre07.g313950
Cre12.g546200	1.11017	0.256181	3.67985	2.25794	-2.32078	-1.21461	0.346794	991	Cre12.g546200.t1.2	RBL5	Rhomboid-like protein									FALSE	FALSE		Cre11.g467676	Cre01.g056331
Cre02.g143387	0	0	0.204103	0.236207	-2.31499	-1.211	0.437462	1146	Cre02.g143387.t1.1	NA	NA									FALSE	FALSE		Cre12.g505750	Cre09.g415800
Cre05.g244350	4.79666	0.707498	12.9962	3.89926	-2.3132	-1.20989	0.231901	808	Cre05.g244350.t1.2	NA	NA									FALSE	TRUE		Cre01.g016300	Cre07.g354600
Cre07.g342700	0.692189	0.180046	2.07631	0.960939	-2.31102	-1.20853	0.319783	947	Cre07.g342700.t1.1/Cre07.g342700.t2.1	NA	2.7.11.1 - Non-specific serine/threonine protein kinase / Threonine-specific protein kinase (1 of 543)									FALSE	FALSE		Cre08.g382530	Cre02.g094600
Cre11.g467765	0.00990965	0.017164	0.102066	0.15813	-2.3105	-1.2082	0.41599	1115	Cre11.g467765.t1.1	NA	NA									TRUE	FALSE		Cre06.g270750	Cre17.g722250
Cre01.g064362	0.799457	0.233412	2.39399	1.16251	-2.30972	-1.20772	0.345566	992	Cre01.g064362.t1.1	NA	PTHR23257//PTHR23257:SF474 - SERINE-THREONINE PROTEIN KINASE // SUBFAMILY NOT NAMED (1 of 7)									FALSE	TRUE		Cre12.g528650	Cre10.g421700
Cre16.g687750	1.4908	0.140075	4.45748	1.7972	-2.30696	-1.20599	0.235751	819	Cre16.g687750.t1.2	NA	2.4.2.26 - Protein xylosyltransferase / Uridine diphosphoxylose-protein xylosyltransferase (1 of 11)									FALSE	TRUE		Cre05.g243358	Cre10.g455900
Cre14.g610750	3.25776	1.2831	11.3736	9.01808	-2.30648	-1.20569	0.303339	925	Cre14.g610750.t1.1	NA	K03327 - multidrug resistance protein, MATE family (TC.MATE, SLC47A, norM, mdtK, dinF) (1 of 11)									FALSE	TRUE		Cre11.g467575	Cre16.g690450
Cre09.g389900	2.6418	2.09387	6.60542	2.54698	-2.30478	-1.20463	0.262584	857	Cre09.g389900.t1.1	HRP4	Hydroxyproline-rich glycoprotein									FALSE	FALSE		Cre02.g090700	Cre16.g670350
Cre12.g486851	0.034006	0.0589002	0.229343	0.207967	-2.30255	-1.20323	0.380727	1064	Cre12.g486851.t1.2	NA	NA									FALSE	FALSE		Cre09.g390763	Cre05.g242100
Cre17.g735600	1.11763	0.76179	3.08344	1.61303	-2.3021	-1.20295	0.337292	981	Cre17.g735600.t1.2	NA	PTHR21493//PTHR21493:SF134 - CGI-141-RELATED/LIPASE CONTAINING PROTEIN // SUBFAMILY NOT NAMED (1 of 1)									FALSE	FALSE		Cre06.g252401	Cre03.g159000
Cre10.g464800	0.029329	0.0257542	0.070989	0.0469948	-2.30171	-1.2027	0.431466	1140	Cre10.g464800.t1.2	NA	PTHR11017 - LEUCINE-RICH REPEAT-CONTAINING PROTEIN (1 of 25)									FALSE	FALSE		Cre17.g722150	Cre12.g489650
Cre13.g591000	0.380548	0.170885	1.13528	0.376526	-2.30161	-1.20264	0.307184	928	Cre13.g591000.t1.2	NA	NA									FALSE	TRUE		Cre01.g003050	Cre16.g663400
Cre02.g115850	0.864122	0.349666	2.3975	0.465875	-2.30044	-1.20191	0.278052	878	Cre02.g115850.t1.2	NA	PF01987 - Mitochondrial biogenesis AIM24 (AIM24) (1 of 3)									FALSE	FALSE		Cre02.g100000	Cre17.g745797
Cre17.g738500	0.406604	0.052149	1.21384	0.482794	-2.30015	-1.20173	0.291571	902	Cre17.g738500.t1.1	NA	PF14661 - HAUS augmin-like complex subunit 6 N-terminus (HAUS6_N) (1 of 1)									FALSE	FALSE		Cre06.g306400	Cre12.g499850
Cre06.g282826	0.903846	0.381312	2.97865	2.28221	-2.29763	-1.20015	0.371781	1055	Cre06.g282826.t1.1	NA	NA									TRUE	FALSE		Cre07.g325731	Cre06.g268501
Cre03.g165186	1.6338	1.50499	2.28506	0.638436	-2.29751	-1.20007	0.395828	1087	Cre03.g165186.t1.2	NA	NA									FALSE	FALSE		Cre02.g117650	Cre07.g335900
Cre12.g532050	0.957161	0.204581	2.77999	0.989872	-2.29735	-1.19997	0.225552	807	Cre12.g532050.t1.2	NA	PF00069//PF04564//PF12796 - Protein kinase domain (Pkinase) // U-box domain (U-box) // Ankyrin repeats (3 copies) (Ank_2) (1 of 1)									TRUE	FALSE		Cre03.g156250	Cre06.g287450
Cre10.g425850	7.91553	2.42951	21.8188	11.9341	-2.29632	-1.19932	0.291276	904	Cre10.g425850.t1.2	NA	NA									FALSE	FALSE		Cre03.g202897	Cre10.g419150
Cre17.g708750	6.29513	1.04336	18.9853	8.7961	-2.29596	-1.1991	0.204825	784	Cre17.g708750.t1.2	NA	NA									FALSE	TRUE		Cre17.g723900	Cre16.g662750
Cre01.g003150	1.23596	0.441164	3.96812	2.11249	-2.29497	-1.19848	0.28859	898	Cre01.g003150.t1.2	NA	NA									TRUE	FALSE		Cre10.g465050	Cre12.g484900
Cre17.g746347	0.308065	0.0786043	0.995449	0.464185	-2.29108	-1.19603	0.356647	1023	Cre17.g746347.t1.1/Cre17.g746347.t2.1	UNG1	Uracil DNA glycosylase									FALSE	TRUE		Cre10.g463250	Cre03.g191300
Cre02.g081150	0.403646	0.247376	1.13704	0.666613	-2.29099	-1.19597	0.366059	1050	Cre02.g081150.t1.1	NA	PF12851 - Oxygenase domain of the 2OGFeDO superfamily (Tet_JBP) (1 of 8)									FALSE	FALSE		Cre02.g141506	Cre16.g667700
Cre12.g522000	0.757497	0.450942	2.08614	1.01622	-2.29069	-1.19578	0.287765	899	Cre12.g522000.t1.1/Cre12.g522000.t2.1	NA	NA									TRUE	FALSE		Cre02.g117550	Cre17.g716850
Cre12.g508250	4.78856	2.62671	14.0355	7.88908	-2.2888	-1.19459	0.259756	863	Cre12.g508250.t1.1	NA	PTHR22975:SF9 - F6D8.33-RELATED (1 of 1)									FALSE	FALSE		Cre02.g099050	Cre06.g295500
Cre16.g685929	0.53195	0.537397	1.29858	0.668114	-2.28829	-1.19427	0.329946	979	Cre16.g685929.t1.1	NA	NA									FALSE	FALSE		Cre07.g329882	Cre06.g299200
Cre17.g716350	0.800935	0.423121	2.27565	0.973637	-2.28774	-1.19393	0.360872	1039	Cre17.g716350.t1.2	NA	PTHR12203 - KDEL LYS-ASP-GLU-LEU CONTAINING - RELATED (1 of 83)									FALSE	TRUE		Cre11.g482050	Cre08.g360700
Cre10.g456950	0.179579	0.0964313	0.547643	0.38739	-2.28612	-1.1929	0.361813	1042	Cre10.g456950.t1.1	NA	PF00112//PF01476 - Papain family cysteine protease (Peptidase_C1) // LysM domain (LysM) (1 of 3)									FALSE	TRUE		Cre04.g215250	Cre07.g350000
Cre03.g163450	0.420921	0.48827	0.939789	1.02393	-2.28591	-1.19277	0.416327	1127	Cre03.g163450.t1.2	NA	3.4.21.27 - Coagulation factor XIa / Plasma thromboplastin antecedent (1 of 1)									FALSE	FALSE		Cre01.g011100	Cre17.g718500
Cre08.g367150	1.67473	0.49632	4.99738	2.55686	-2.2845	-1.19188	0.300209	929	Cre08.g367150.t1.1/Cre08.g367150.t2.1	NA	PF07690 - Major Facilitator Superfamily (MFS_1) (1 of 37)									FALSE	TRUE		Cre10.g435400	Cre03.g153000
Cre01.g053000	2.91452	1.29752	12.1155	13.0882	-2.27958	-1.18877	0.362311	1048	Cre01.g053000.t1.2	GPD2	Glycerol-3-phosphate dehydrogenase/dihydroxyacetone-3-phosphate reductase									TRUE	FALSE		Cre08.g371052	Cre09.g393432
Cre14.g609400	1.78144	0.253432	5.08024	1.57895	-2.27939	-1.18865	0.291579	921	Cre14.g609400.t1.1	NA	1.8.4.11 - Peptide-methionine (S)-S-oxide reductase / Peptide methionine sulfoxide reductase (1 of 6)									FALSE	TRUE		Cre01.g035350	Cre02.g100150
Cre12.g538200	0.31715	0.216635	0.884218	0.541263	-2.27747	-1.18743	0.347142	1015	Cre12.g538200.t1.2	NA	PTHR23305//PTHR23305:SF1 - GTP-BINDING PROTEIN-RELATED // SUBFAMILY NOT NAMED (1 of 1)									FALSE	FALSE		Cre12.g500550	Cre09.g395806
Cre06.g287250	2.75335	1.54395	7.73355	3.84582	-2.27713	-1.18722	0.323933	971	Cre06.g287250.t1.2	COG4	Component of oligomeric golgi complex									TRUE	FALSE		Cre12.g516100	Cre11.g468700
Cre12.g506850	0.287982	0.498799	0.467884	0.335192	-2.27683	-1.18703	0.423292	1143	Cre12.g506850.t1.2	NA	PTHR10183//PTHR10183:SF323 - CALPAIN // SUBFAMILY NOT NAMED (1 of 2)									TRUE	FALSE		Cre11.g468000	Cre13.g564650
Cre09.g392097	0.479482	0.332581	1.17964	0.175713	-2.27605	-1.18653	0.354795	1037	Cre09.g392097.t1.1	NA	NA									FALSE	FALSE		Cre08.g371450	Cre10.g419350
Cre01.g042450	0.476327	0.20371	1.57583	1.2189	-2.27504	-1.18589	0.320185	966	Cre01.g042450.t1.1	NA	PTHR11319 - G PROTEIN-COUPLED RECEPTOR-RELATED (1 of 14)									FALSE	TRUE		Cre03.g175500	Cre08.g360500
Cre09.g407120	1.09049	0.476806	2.74742	0.567817	-2.27494	-1.18583	0.268299	884	Cre09.g407120.t1.2	NA	NA									FALSE	TRUE		Cre12.g521000	Cre06.g285150
Cre10.g444550	2.24137	0.997139	5.95355	0.858619	-2.27451	-1.18556	0.252308	865	Cre10.g444550.t1.2	SPP1	Signal peptide peptidase									TRUE	FALSE		Cre14.g618800	Cre01.g012750
Cre07.g329476	0.165689	0.286982	0.711581	0.621301	-2.27351	-1.18492	0.401972	1112	Cre07.g329476.t1.1	NA	NA									FALSE	FALSE		Cre16.g664450	Cre10.g456400
Cre11.g475050	1.56206	0.810709	4.03435	1.61481	-2.27309	-1.18466	0.302439	948	Cre11.g475050.t1.2	NA	K17973 - N-terminal acetyltransferase B complex non-catalytic subunit (NAA25, MDM20) (1 of 1)									FALSE	FALSE		Cre01.g054200	Cre14.g613501
Cre02.g092600	2.31224	1.00371	6.13033	1.80945	-2.27206	-1.184	0.263904	879	Cre02.g092600.t1.2	CPX2	Coproporphyrinogen III oxidase									FALSE	FALSE		Cre16.g647750	Cre09.g388352
Cre17.g736750	1.90532	0.71355	5.14394	1.38556	-2.27198	-1.18395	0.232646	838	Cre17.g736750.t1.1	NA	PTHR22640:SF2 - STRUCTURAL MAINTENANCE OF CHROMOSOMES FLEXIBLE HINGE DOMAIN-CONTAINING PROTEIN 1 (1 of 2)									FALSE	FALSE		Cre06.g292700	Cre01.g036900
Cre06.g286100	2.79617	0.736759	7.62066	1.38102	-2.27068	-1.18312	0.234615	845	Cre06.g286100.t1.1	NA	NA									FALSE	TRUE		Cre16.g648750	Cre14.g623403
Cre10.g419200	0.833427	0.365117	2.42852	1.37093	-2.2706	-1.18307	0.300374	946	Cre10.g419200.t1.1/Cre10.g419200.t2.1	NA	NA									FALSE	TRUE		Cre03.g208000	Cre13.g564450
Cre03.g202100	1.08039	0.630951	2.89357	1.06708	-2.26871	-1.18187	0.35412	1051	Cre03.g202100.t1.1	NA	PTHR21228 - FAST LEU-RICH DOMAIN-CONTAINING (1 of 85)									FALSE	FALSE		Cre16.g654350	Cre13.g574250
Cre08.g360050	0.840501	0.350786	2.64809	1.86088	-2.26841	-1.18168	0.321332	977	Cre08.g360050.t1.1/Cre08.g360050.t2.1	DUR1	Urea carboxylase/allophanate hydrolase									FALSE	TRUE		Cre10.g439950	Cre09.g389950
Cre09.g400800	0.899397	0.416746	2.77146	1.73884	-2.26591	-1.18009	0.338968	1014	Cre09.g400800.t1.2	NA	PTHR26392 - MITOGEN-ACTIVATED PROTEIN KINASE KINASE KINASE 7-RELATED (1 of 17)									FALSE	FALSE		Cre01.g032750	Cre09.g393150
Cre07.g345900	1.481	0.66361	4.23481	1.95414	-2.26566	-1.17993	0.274286	897	Cre07.g345900.t1.1	DCL3	Dicer-like protein									FALSE	TRUE		Cre09.g394450	Cre12.g537000
Cre06.g278202	0.253644	0.236677	0.970619	1.18491	-2.26504	-1.17953	0.429042	1169	Cre06.g278202.t1.1	NA	3.1.3.25//3.1.3.93 - Inositol-phosphate phosphatase / Myo-inositol-1-phosphatase (1 of 1)									TRUE	FALSE		Cre02.g088900	Cre04.g221550
Cre16.g690050	0.54488	0.364588	1.79481	1.46686	-2.26379	-1.17874	0.371205	1074	Cre16.g690050.t1.2	HCS2	Cytochrome c heme lyase									FALSE	FALSE		Cre16.g683371	Cre10.g462200
Cre07.g313700	7.68938	2.79719	21.6041	8.1484	-2.26293	-1.17819	0.197356	800	Cre07.g313700.t1.1	NA	Glutamyl/glutaminyl-tRNA synthetase									FALSE	TRUE		Cre06.g304950	Cre11.g467651
Cre06.g278108	0.557129	0.308626	1.543	0.459793	-2.26239	-1.17785	0.344101	1027	Cre06.g278108.t1.1/Cre06.g278108.t2.1	NA	N-acetyltransferase									FALSE	FALSE		Cre03.g157326	Cre07.g333400
Cre03.g191600	0.860429	0.273679	2.88514	1.98829	-2.26228	-1.17778	0.331564	1004	Cre03.g191600.t1.1	NA	NA									FALSE	FALSE		Cre08.g368950	Cre14.g630600
Cre02.g084700	0.0276468	0.0478857	0.133844	0.151215	-2.26174	-1.17743	0.400181	1121	Cre02.g084700.t1.2	NA	NA									FALSE	FALSE		Cre02.g108050	Cre02.g107050
Cre04.g224200	13.3025	5.1074	37.5331	16.9262	-2.26044	-1.1766	0.204701	817	Cre04.g224200.t1.2	NA	PTHR18841 - VITELLINE MEMBRANE OUTER LAYER PROTEIN I-RELATED (1 of 2)									FALSE	TRUE		Cre13.g591800	Cre09.g401650
Cre03.g145727	7.50672	4.31389	21.2778	11.0445	-2.26042	-1.17659	0.324367	995	Cre03.g145727.t1.1	NA	PTHR11946:SF53 - TYROSINE-TRNA LIGASE (1 of 1)									FALSE	FALSE		Cre01.g004350	Cre09.g386131
Cre03.g205450	1.38225	0.508145	4.23521	2.48466	-2.2603	-1.17651	0.354819	1058	Cre03.g205450.t1.1	NA	NA									FALSE	TRUE		Cre14.g620400	Cre10.g459650
Cre02.g093500	0.977809	0.15165	2.9287	1.21682	-2.25949	-1.176	0.292855	944	Cre02.g093500.t1.2/Cre02.g093500.t2.1	SSD1	Sterol sensing 5-transmembrane protein									TRUE	FALSE		Cre03.g172600	Cre15.g637249
Cre03.g186000	2.29679	0.547272	6.52847	2.37455	-2.25872	-1.1755	0.306548	963	Cre03.g186000.t1.2	NA	PF08670 - MEKHLA domain (MEKHLA) (1 of 1)									FALSE	TRUE		Cre02.g076600	Cre12.g507400
Cre06.g270200	2.52249	1.17977	6.76378	1.47751	-2.25855	-1.1754	0.263446	891	Cre06.g270200.t1.1	NA	K05857 - phosphatidylinositol phospholipase C, delta (PLCD) (1 of 1)									FALSE	FALSE		Cre07.g322400	Cre12.g486700
Cre12.g556700	0.0616657	0.0394823	0.256635	0.211528	-2.2569	-1.17434	0.418711	1160	Cre12.g556700.t1.2	NA	NA									FALSE	FALSE		Cre09.g396809	Cre12.g553450
Cre14.g625850	0.863515	0.257266	2.55806	1.27064	-2.25409	-1.17255	0.329916	1005	Cre14.g625850.t1.1	NA	3.4.24.38 - Gametolysin / Lysin (1 of 37)									FALSE	FALSE		Cre01.g022550	Cre17.g741250
Cre07.g342750	2.34532	1.26951	5.95248	1.4125	-2.25234	-1.17142	0.285323	932	Cre07.g342750.t1.1	NA	K18106 - D-galacturonate reductase (GAAA) (1 of 1)									FALSE	TRUE		Cre10.g447300	Cre10.g440000
Cre01.g055440	0.375039	0.325328	0.63187	0.208325	-2.25183	-1.1711	0.409244	1145	Cre01.g055440.t1.1	NA	PTHR10605 - HEPARAN SULFATE 3-O SULFOTRANSFERASE (1 of 7)									FALSE	FALSE		Cre01.g026550	Cre07.g330200
Cre03.g192100	1.04898	0.297347	3.22293	1.49567	-2.25076	-1.17041	0.383566	1097	Cre03.g192100.t1.1	NA	NA									FALSE	FALSE		Cre03.g207713	Cre09.g395176
Cre07.g326500	0.511071	0.436772	1.28916	0.948412	-2.24955	-1.16964	0.433628	1185	Cre07.g326500.t1.2	NA	NA									TRUE	FALSE		Cre10.g426400	Cre03.g154350
Cre13.g567100	1.9289	0.810101	5.58912	3.00028	-2.24941	-1.16955	0.358514	1068	Cre13.g567100.t1.1	NA	D-arabinono-1,4-lactone oxidase/L-galactono-1,4-lactone dehydrogenase									TRUE	FALSE		Cre02.g119600	Cre01.g051550
Cre13.g564450	1.35455	0.827161	3.51879	0.964453	-2.24861	-1.16903	0.32796	1007	Cre13.g564450.t1.1	NA	2.4.1.224 - Glucuronosyl-N-acetylglucosaminyl-proteoglycan 4-alpha-N- acetylglucosaminyltransferase / acetylglucosaminyltransferase (1 of 2)									FALSE	TRUE		Cre07.g318500	Cre12.g543900
Cre02.g119250	0.894587	0.519911	2.32767	0.924905	-2.24694	-1.16796	0.391919	1114	Cre02.g119250.t1.2	NA	NA									FALSE	FALSE		Cre12.g486750	Cre16.g647950
Cre16.g665950	0.188137	0.11564	0.512416	0.0977896	-2.24679	-1.16787	0.416168	1163	Cre16.g665950.t1.1	MCM8	Minichromosome maintenance protein									FALSE	FALSE		Cre15.g635200	Cre03.g169950
Cre08.g358350	0.538873	0.348628	1.3697	0.673106	-2.24611	-1.16743	0.389509	1107	Cre08.g358350.t1.1	NA	PTHR21228 - FAST LEU-RICH DOMAIN-CONTAINING (1 of 85)									FALSE	TRUE		Cre16.g657550	Cre09.g415300
Cre13.g571560	0.745199	0.408556	1.93883	0.78423	-2.24527	-1.16689	0.335261	1030	Cre13.g571560.t1.1	NA	PTHR13374 - DET1 HOMOLOG DE-ETIOLATED-1 HOMOLOG (1 of 1)									FALSE	TRUE		Cre03.g186550	Cre16.g685550
Cre13.g569000	4.74387	0.677536	13.4891	4.95763	-2.2443	-1.16627	0.199682	825	Cre13.g569000.t1.1	NA	PF00350 - Dynamin family (Dynamin_N) (1 of 13)									TRUE	FALSE		Cre17.g711650	Cre03.g155900
Cre13.g588900	0.153372	0.110126	0.445652	0.332708	-2.24382	-1.16596	0.396248	1125	Cre13.g588900.t1.1	NA	PTHR13620 - 3-5 EXONUCLEASE (1 of 6)									FALSE	FALSE		Cre04.g217922	Cre03.g196550
Cre12.g545750	0.186516	0.131868	0.497901	0.232979	-2.24282	-1.16531	0.395227	1122	Cre12.g545750.t1.2	NA	KOG0198//KOG0581 - MEKK and related serine/threonine protein kinases // Mitogen-activated protein kinase kinase (MAP2K) (1 of 6)									FALSE	FALSE		Cre16.g658526	Cre10.g462350
Cre10.g438350	1.07801	0.665116	2.74495	0.805465	-2.23941	-1.16312	0.347233	1060	Cre10.g438350.t1.1	NA	NA									FALSE	FALSE		Cre09.g414200	Cre10.g425251
Cre07.g322884	0.105383	0.113203	0.281699	0.28219	-2.23886	-1.16277	0.424008	1177	Cre07.g322884.t1.2/Cre07.g322884.t2.1	NA	PTHR11926:SF16 - PROTEIN UGT-61-RELATED (1 of 1)									FALSE	FALSE		Cre05.g233800	Cre09.g394362
Cre07.g328700	0.738236	0.143958	2.16602	1.05601	-2.237	-1.16157	0.376299	1096	Cre07.g328700.t1.1	NA	NA									TRUE	FALSE		Cre03.g160300	Cre02.g087800
Cre13.g569600	0.146016	0.138927	0.337772	0.173046	-2.23403	-1.15965	0.405313	1147	Cre13.g569600.t1.2	NA	PF03992 - Antibiotic biosynthesis monooxygenase (ABM) (1 of 5)									FALSE	TRUE		Cre03.g170400	Cre07.g342750
Cre02.g078000	0.764948	0.310582	2.21443	1.19313	-2.23341	-1.15925	0.383031	1103	Cre02.g078000.t1.1	NA	NA									FALSE	FALSE		Cre01.g013600	Cre07.g331475
Cre05.g243050	5.81204	3.26808	13.6654	1.80962	-2.23301	-1.15899	0.330407	1028	Cre05.g243050.t1.2	NA	Chloroplastic thioredoxin f2									FALSE	TRUE		Cre13.g604700	Cre14.g615900
Cre07.g334851	1.68932	1.00219	4.29476	0.841234	-2.23149	-1.15801	0.352296	1070	Cre07.g334851.t1.1	NA	K17808 - mitochondrial protein import protein ZIM17 (ZIM17, DNLZ, Tim15) (1 of 1)									FALSE	TRUE		Cre10.g464133	Cre16.g659750
Cre16.g688751	0.659791	0.0672576	1.82471	0.478694	-2.22828	-1.15593	0.374489	1092	Cre16.g688751.t1.1	NA	NA									FALSE	FALSE		Cre01.g028713	Cre03.g183300
Cre02.g090500	0.140448	0.0347025	0.43277	0.253719	-2.22803	-1.15577	0.385221	1111	Cre02.g090500.t1.1	NA	K13131 - ATP-dependent RNA helicase DDX20 (DDX20, GEMIN3) (1 of 1)									FALSE	FALSE		Cre17.g737050	Cre01.g042700
Cre03.g203009	0.329902	0.34939	0.964983	0.71089	-2.22744	-1.15539	0.40888	1158	Cre03.g203009.t1.1	NA	NA									FALSE	TRUE		Cre03.g191150	Cre14.g621475
Cre03.g204465	0.69524	0.465247	1.73745	0.788396	-2.22688	-1.15502	0.380738	1100	Cre03.g204465.t1.1/Cre03.g204465.t2.1/Cre03.g204465.t3.1	NA	PTHR12203 - KDEL LYS-ASP-GLU-LEU CONTAINING - RELATED (1 of 83)									FALSE	TRUE		Cre05.g237400	Cre02.g101000
Cre14.g615800	1.38312	0.223635	4.18463	2.27462	-2.22678	-1.15496	0.299163	972	Cre14.g615800.t1.2	NA	PTHR31563:SF1 - ION CHANNEL POLLUX-RELATED (1 of 4)									FALSE	TRUE		Cre07.g337900	Cre05.g246950
Cre08.g367700	0.508581	0.329367	1.5024	0.936642	-2.22457	-1.15352	0.364884	1086	Cre08.g367700.t1.1	NA	PTHR28259:SF1 - UPF0695 MEMBRANE PROTEIN YOR390W-RELATED (1 of 1)									TRUE	FALSE		Cre06.g311100	Cre16.g693204
Cre12.g510750	2.3078	0.992297	5.84168	1.02555	-2.22434	-1.15338	0.277133	941	Cre12.g510750.t1.1	NA	NA									FALSE	FALSE		Cre08.g376800	Cre13.g562250
Cre09.g400000	1.16142	0.680282	3.38122	2.07029	-2.22414	-1.15325	0.358458	1081	Cre09.g400000.t1.1	NA	NA									FALSE	TRUE		Cre13.g565550	Cre04.g230340
Cre12.g515150	4.79449	3.71775	12.7033	7.64511	-2.22379	-1.15302	0.352136	1072	Cre12.g515150.t1.2	NA	K17784 - mitochondrial inner membrane organizing system protein 1 (MINOS1, MOS1) (1 of 1)									FALSE	FALSE		Cre10.g438750	Cre02.g085800
Cre03.g161000	1.34057	0.463307	3.72991	1.19326	-2.22289	-1.15244	0.329751	1038	Cre03.g161000.t1.1	NA	3.5.4.4 - Adenosine deaminase / Adenosine aminohydrolase (1 of 1)									FALSE	TRUE		Cre02.g092350	Cre17.g710650
Cre11.g467724	2.13956	1.17711	5.57848	1.39853	-2.22264	-1.15227	0.346627	1065	Cre11.g467724.t1.1	NA	NA									FALSE	TRUE		Cre19.g751347	Cre04.g219600
Cre01.g042800	3.8323	1.91275	9.66503	3.58566	-2.22248	-1.15217	0.32184	1018	Cre01.g042800.t1.2	DVR1	3,8-divinyl protochlorophyllide a 8-vinyl reductase									FALSE	FALSE		Cre01.g028500	Cre17.g699000
Cre13.g602650	4.13003	1.73074	12.1921	7.31581	-2.22246	-1.15216	0.351429	1076	Cre13.g602650.t1.2	NA	PTHR12231:SF150 - RHODANESE-LIKE DOMAIN-CONTAINING PROTEIN 11, CHLOROPLASTIC (1 of 1)									FALSE	TRUE		Cre17.g699400	Cre16.g649400
Cre17.g731300	6.3679	3.41574	16.6708	5.32264	-2.21882	-1.14979	0.251416	908	Cre17.g731300.t1.2	NA	PTHR12608 - TRANSMEMBRANE PROTEIN HTP-1 RELATED (1 of 4)									TRUE	FALSE		Cre09.g394100	Cre02.g086050
Cre16.g682600	0.15647	0.170901	0.405333	0.379513	-2.21828	-1.14944	0.436769	1208	Cre16.g682600.t1.1	NA	PTHR24079:SF0 - KNIRPS-RELATED PROTEIN-RELATED (1 of 1)									FALSE	FALSE		Cre03.g156050	Cre17.g709600
Cre07.g328200	0.492863	0.164187	1.56934	0.974591	-2.21765	-1.14903	0.372402	1098	Cre07.g328200.t1.2	PSBP6	Lumen targeted protein									FALSE	FALSE		Cre01.g012500	Cre06.g265750
Cre02.g083800	6.25463	1.72713	19.2196	12.2056	-2.21699	-1.14861	0.288258	964	Cre02.g083800.t1.2/Cre02.g083800.t2.1	NA	dTDP-glucose 4,6-dehydratase									TRUE	FALSE		Cre09.g407200	Cre02.g111150
Cre11.g467602	0.0189741	0.0164366	0.0851038	0.0717532	-2.21411	-1.14673	0.40931	1171	Cre11.g467602.t1.1	NA	KOG3584 - cAMP response element binding protein and related transcription factors (1 of 1)									FALSE	FALSE		Cre06.g298100	Cre07.g320500
Cre06.g250902	4.47122	2.32987	12.0349	5.08141	-2.21392	-1.1466	0.250965	910	Cre06.g250902.t1.1	NA	2.1.1.13 - Methionine synthase / Vitamin B12 methyltransferase (1 of 1)									FALSE	FALSE		Cre16.g690200	Cre06.g250650
Cre11.g482550	0.183472	0.0521634	0.493226	0.0957081	-2.21347	-1.14631	0.366574	1093	Cre11.g482550.t1.1	NA	NA									FALSE	FALSE		Cre06.g283634	Cre01.g023550
Cre02.g092950	3.0364	1.22773	8.90816	5.02282	-2.21125	-1.14486	0.299054	988	Cre02.g092950.t1.2	NA	NA									TRUE	FALSE		Cre03.g155650	Cre16.g676800
Cre01.g034300	0.520029	0.136648	1.38579	0.343583	-2.20968	-1.14384	0.398415	1153	Cre01.g034300.t1.2	NA	PF09073 - BUD22 (BUD22) (1 of 1)									FALSE	FALSE		Cre02.g118801	Cre14.g612800
Cre02.g100900	2.0394	1.18525	5.53104	2.62858	-2.20923	-1.14354	0.324745	1045	Cre02.g100900.t1.2	NA	PTHR12298 - PCDC2 PROGRAMMED CELL DEATH PROTEIN 2 -RELATED (1 of 39)									FALSE	FALSE		Cre07.g318850	Cre04.g217924
Cre12.g561050	0.813605	0.34618	2.53391	1.58729	-2.20758	-1.14246	0.372413	1104	Cre12.g561050.t1.1	ELG18	Exostosin-like glycosyltransferase									FALSE	FALSE		Cre12.g528700	Cre08.g385500
Cre17.g699350	5.3288	1.38314	15.815	8.41004	-2.20543	-1.14106	0.302738	998	Cre17.g699350.t1.1	NA	PF12847 - Methyltransferase domain (Methyltransf_18) (1 of 13)									FALSE	FALSE		Cre13.g571750	Cre12.g530350
Cre10.g450650	4.57526	1.29619	11.8904	2.06313	-2.20455	-1.14048	0.194744	844	Cre10.g450650.t1.2	NA	PF00168 - C2 domain (C2) (1 of 32)									FALSE	FALSE		Cre06.g249750	Cre11.g467758
Cre12.g495650	2.40356	0.787555	6.83778	3.65866	-2.20426	-1.14029	0.367619	1099	Cre12.g495650.t1.2	NA	PTHR19847 - WD40 REPEAT PROTEIN (1 of 2)									FALSE	FALSE		Cre01.g036550	Cre03.g204689
Cre10.g437500	6.90485	1.33008	19.3133	7.49491	-2.20391	-1.14007	0.28576	969	Cre10.g437500.t1.2	TOM7	Translocase of mitochondrial outer membrane									FALSE	FALSE		Cre17.g734450	Cre10.g432850
Cre01.g052950	0.185898	0.0715055	0.516577	0.188029	-2.20379	-1.13998	0.345679	1078	Cre01.g052950.t1.1	PSO2	Artemis-related DNA-crosslink repair exonuclease									FALSE	FALSE		Cre03.g199759	Cre12.g527400
Cre10.g454500	0.40626	0.256744	1.13778	0.484221	-2.20374	-1.13996	0.394013	1149	Cre10.g454500.t1.1	NA	NA									FALSE	FALSE		Cre04.g231222	Cre12.g561500
Cre18.g749547	0.713065	0.306121	2.14675	1.32571	-2.20315	-1.13957	0.404042	1172	Cre18.g749547.t1.1	NA	PF07510 - Protein of unknown function (DUF1524) (DUF1524) (1 of 1)									FALSE	FALSE		Cre03.g159750	Cre01.g012800
Cre11.g480050	0.114963	0.199122	0.287725	0.351846	-2.20008	-1.13756	0.516374	1362	Cre11.g480050.t1.1	NA	PTHR26379:SF144 - BTB/POZ DOMAIN-CONTAINING PROTEIN 19 (1 of 8)									FALSE	FALSE		Cre10.g460326	Cre16.g666150
Cre16.g688950	0.0692666	0.119973	0.14204	0.0309861	-2.19823	-1.13634	0.450849	1234	Cre16.g688950.t1.2	NA	2.4.1.5 - Dextransucrase / Sucrose 6-glucosyltransferase (1 of 4)									FALSE	FALSE		Cre07.g351050	Cre02.g097150
Cre08.g362900	0.901428	0.269105	2.95228	2.06083	-2.19798	-1.13618	0.40303	1173	Cre08.g362900.t1.1	PSBP4	Lumenal PsbP-like protein									FALSE	TRUE		Cre12.g535900	Cre02.g110250
Cre01.g064727	0.42279	0.317128	1.23284	0.94464	-2.19783	-1.13608	0.414153	1188	Cre01.g064727.t1.1	NA	PTHR23257 - SERINE-THREONINE PROTEIN KINASE (1 of 268)									FALSE	FALSE		Cre06.g304913	Cre12.g496250
Cre06.g275900	0.262213	0.256557	1.52096	2.22316	-2.19761	-1.13594	0.464576	1256	Cre06.g275900.t1.2	HON2	Histone H1									FALSE	FALSE		Cre06.g284400	Cre09.g417050
Cre02.g100500	0.333904	0.135175	1.01956	0.7245	-2.19504	-1.13425	0.374462	1119	Cre02.g100500.t1.1/Cre02.g100500.t2.1	CYG22	Adenylate/guanylate cyclase									FALSE	FALSE		Cre14.g625251	Cre07.g339300
Cre06.g263200	1.04359	0.830966	2.95359	2.48236	-2.19485	-1.13413	0.423621	1203	Cre06.g263200.t1.1	NA	NA									FALSE	FALSE		Cre07.g328700	Cre12.g558526
Cre02.g077200	1.84525	0.660232	5.17344	1.79349	-2.19457	-1.13394	0.385587	1132	Cre02.g077200.t1.2	NA	NA									FALSE	TRUE		Cre16.g693202	Cre10.g454000
Cre07.g341000	0.330657	0.245963	0.857394	0.433784	-2.19243	-1.13253	0.398167	1166	Cre07.g341000.t1.1	NA	2.7.11.1 - Non-specific serine/threonine protein kinase / Threonine-specific protein kinase (1 of 543)									FALSE	FALSE		Cre01.g009101	Cre13.g578350
Cre13.g582350	1.55008	0.459499	4.40292	1.93345	-2.192	-1.13225	0.346975	1083	Cre13.g582350.t1.1	NA	K12164 - ubiquitin-like modifier-activating enzyme 5 (UBA5, UBE1DC1) (1 of 1)									TRUE	FALSE		Cre10.g421500	Cre01.g042250
Cre11.g469350	1.04837	0.530688	2.72136	0.810714	-2.18935	-1.1305	0.355223	1094	Cre11.g469350.t1.1	NA	PF03133 - Tubulin-tyrosine ligase family (TTL) (1 of 14)									FALSE	FALSE		Cre06.g260350	Cre02.g116800
Cre04.g224002	1.11344	0.507051	3.12663	1.20316	-2.18658	-1.12868	0.38572	1141	Cre04.g224002.t1.1	NA	K10770 - alkylated DNA repair protein alkB homolog 8 [EC:1.14.11.- 2.1.1.229] (ALKBH8) (1 of 1)									FALSE	FALSE		Cre17.g744697	Cre12.g558350
Cre03.g177100	0.587777	0.443222	1.48723	0.379659	-2.18425	-1.12714	0.393058	1157	Cre03.g177100.t1.2	NA	PTHR31867:SF1 - EXPANSIN-A1-RELATED (1 of 11)									FALSE	FALSE		Cre08.g380000	Cre05.g240900
Cre12.g513100	0.924987	0.154236	2.55824	0.743199	-2.1829	-1.12625	0.36675	1109	Cre12.g513100.t1.2	NA	3.2.1.165 - Exo-1,4-beta-D-glucosaminidase / GlcNase (1 of 1)									FALSE	FALSE		Cre08.g358559	Cre09.g393728
Cre04.g218650	0.471755	0.272557	1.35732	0.80547	-2.1822	-1.12579	0.389954	1152	Cre04.g218650.t1.1	UCP3	Uncoupling protein									FALSE	FALSE		Cre10.g433900	Cre01.g001600
Cre09.g386400	15.6431	8.07745	40.5407	16.309	-2.18182	-1.12553	0.301401	1011	Cre09.g386400.t1.2	UBA1	Ubiquitin-activating enzyme E1									TRUE	FALSE		Cre06.g270850	Cre17.g702351
Cre11.g467795	2.50071	0.958212	7.01881	3.53409	-2.17963	-1.12408	0.317495	1047	Cre11.g467795.t1.1	NA	K05853 - Ca2+ transporting ATPase, sarcoplasmic/endoplasmic reticulum (ATP2A) (1 of 1)									TRUE	FALSE		Cre10.g461100	Cre07.g338000
Cre15.g638303	0.412695	0.196553	1.11298	0.420842	-2.17962	-1.12408	0.382764	1137	Cre15.g638303.t1.1	NA	PF08373 - RAP domain (RAP) (1 of 30)									FALSE	TRUE		Cre10.g435450	Cre09.g399912
Cre09.g417100	3.74734	3.55627	9.18325	6.54598	-2.17809	-1.12307	0.402026	1181	Cre09.g417100.t1.1	NA	NA									FALSE	FALSE		Cre12.g501200	Cre16.g662951
Cre09.g415400	1.6793	0.732761	4.57858	2.13435	-2.17775	-1.12284	0.383127	1142	Cre09.g415400.t1.1	NA	PTHR15922:SF2 - NEUROBLASTOMA-AMPLIFIED SEQUENCE (1 of 1)									FALSE	FALSE		Cre05.g247600	Cre07.g329300
Cre16.g661350	1.87349	0.815252	5.03148	2.01511	-2.17715	-1.12244	0.362867	1106	Cre16.g661350.t1.2	RMT1	Rubisco large subunit N-methyltransferase									FALSE	TRUE		Cre02.g079300	Cre03.g160250
Cre11.g467641	1.70828	0.180208	4.6323	1.56607	-2.17586	-1.12159	0.308815	1026	Cre11.g467641.t1.1	NA	NA									FALSE	TRUE		Cre16.g648700	Cre04.g227400
Cre03.g195950	0.698582	0.187944	2.21593	1.62932	-2.17581	-1.12155	0.392143	1161	Cre03.g195950.t1.2	NA	PTHR11584:SF381 - PROTEIN PQN-80, ISOFORM B (1 of 7)									FALSE	TRUE		Cre03.g173132	Cre07.g320050
Cre13.g569700	0.573913	0.257369	1.61638	0.755412	-2.17578	-1.12153	0.375508	1128	Cre13.g569700.t1.1	NA	NA									FALSE	FALSE		Cre06.g306057	Cre17.g725650
Cre10.g439500	0.922728	0.563309	2.61845	1.59899	-2.17536	-1.12126	0.40095	1178	Cre10.g439500.t1.1	NA	NA									FALSE	FALSE		Cre11.g467723	Cre03.g158450
Cre12.g487100	1.23563	0.197636	3.48418	1.55169	-2.17423	-1.1205	0.375464	1130	Cre12.g487100.t1.2	NA	PTHR11946:SF89 - METHIONYL-TRNA SYNTHETASE (1 of 1)									FALSE	TRUE		Cre01.g035850	Cre09.g399738
Cre14.g630400	1.45983	0.918093	3.95237	2.15241	-2.17349	-1.12001	0.37851	1133	Cre14.g630400.t1.2	NA	1.1.1.316 - L-galactose 1-dehydrogenase / L-galDH (1 of 1)									FALSE	TRUE		Cre12.g486250	Cre06.g278226
Cre01.g031450	0.181608	0.0431289	0.628026	0.439885	-2.17186	-1.11893	0.4424	1243	Cre01.g031450.t1.2	NA	NA									FALSE	FALSE		Cre09.g395436	Cre02.g103784
Cre18.g748497	0.427154	0.118719	1.15028	0.341154	-2.17128	-1.11855	0.387715	1156	Cre18.g748497.t1.1	NA	3.1.3.66 - Phosphatidylinositol-3,4-bisphosphate 4-phosphatase / Phosphoinositide 4-phosphatase (1 of 3)									FALSE	FALSE		Cre03.g210961	Cre12.g531150
Cre09.g403400	0.401062	0.0652428	1.3296	0.979196	-2.17025	-1.11786	0.418396	1209	Cre09.g403400.t1.1	NA	PF13637//PF13920 - Ankyrin repeats (many copies) (Ank_4) // Zinc finger, C3HC4 type (RING finger) (zf-C3HC4_3) (1 of 2)									FALSE	FALSE		Cre12.g485418	Cre02.g099750
Cre17.g708650	0.351754	0.149182	0.999626	0.12582	-2.17006	-1.11774	0.409606	1196	Cre17.g708650.t1.2	HFO20	Histone H4									FALSE	FALSE		Cre11.g467722	Cre14.g630550
Cre09.g390393	0.0490213	0.0849074	0.27837	0.271628	-2.16661	-1.11544	0.468061	1278	Cre09.g390393.t1.1/Cre09.g390393.t2.1	NA	PF01713 - Smr domain (Smr) (1 of 5)									FALSE	FALSE		Cre10.g453100	Cre10.g448850
Cre10.g456650	0.222078	0.108001	0.782007	0.645138	-2.16627	-1.11521	0.42766	1228	Cre10.g456650.t1.1	NA	1.4.3.4 - Monoamine oxidase / Tyramine oxidase (1 of 1)									FALSE	FALSE		Cre12.g558650	Cre03.g144807
Cre17.g726500	0.245604	0.0839374	0.668137	0.0557035	-2.16609	-1.1151	0.412942	1205	Cre17.g726500.t1.2	ORC4	Origin recognition complex subunit 4									FALSE	FALSE		Cre08.g377750	Cre12.g527750
Cre02.g119651	0.876008	0.187937	2.40134	0.933299	-2.16447	-1.11401	0.353912	1102	Cre02.g119651.t1.2	NA	2.4.1.229 - [Skp1-protein]-hydroxyproline N-acetylglucosaminyltransferase / transferase (1 of 3)									FALSE	FALSE		Cre10.g458750	Cre09.g396289
Cre16.g670550	0.484789	0.282248	1.28229	0.646069	-2.16383	-1.11359	0.395536	1174	Cre16.g670550.t1.1	NA	K15338 - flap endonuclease GEN [EC:3.1.-.-] (GEN1, GEN) (1 of 1)									FALSE	TRUE		Cre02.g111300	Cre11.g474950
Cre17.g746047	0.506395	0.265529	1.42049	0.813238	-2.16359	-1.11343	0.387523	1162	Cre17.g746047.t1.1	NA	NA									FALSE	TRUE		Cre16.g681657	Cre06.g290850
Cre17.g734900	3.35192	1.13674	8.80452	3.409	-2.1628	-1.1129	0.33602	1084	Cre17.g734900.t1.2/Cre17.g734900.t2.1	NA	3.4.17.19 - Carboxypeptidase Taq / Carboxypeptidase 1 (1 of 1)									TRUE	FALSE		Cre03.g146527	Cre08.g368750
Cre12.g537850	2.19011	0.960048	5.54968	0.814873	-2.16121	-1.11184	0.360846	1117	Cre12.g537850.t1.2	CCB2	Protein required for cyt b6 assembly									FALSE	FALSE		Cre12.g511650	Cre08.g384100
Cre02.g083500	0.875294	0.400999	2.2314	0.224367	-2.16031	-1.11124	0.375979	1144	Cre02.g083500.t1.2	NA	1.14.13.114 - 6-hydroxynicotinate 3-monooxygenase / HNA-3-monooxygenase (1 of 5)									TRUE	FALSE		Cre08.g377300	Cre16.g648200
Cre22.g754047	0.0589427	0.102092	0.20848	0.18768	-2.15982	-1.11091	0.463848	1276	Cre22.g754047.t1.1	NA	NA									FALSE	FALSE		Cre14.g618400	Cre06.g304550
Cre02.g113750	0.399056	0.482052	0.798137	0.458813	-2.15466	-1.10746	0.416678	1218	Cre02.g113750.t1.1	NA	PTHR22916 - GLYCOSYLTRANSFERASE (1 of 7)									TRUE	FALSE		Cre03.g198050	Cre14.g618050
Cre07.g352550	3.73226	0.875334	10.6706	4.89837	-2.15456	-1.10739	0.369447	1131	Cre07.g352550.t1.2	RDP3	Putative rhodanese domain phosphatase									FALSE	FALSE		Cre09.g392430	Cre04.g227200
Cre02.g117250	2.51108	0.401183	7.16177	3.31195	-2.1543	-1.10722	0.308175	1052	Cre02.g117250.t1.1/Cre02.g117250.t2.1	NA	3.2.1.23 - Beta-galactosidase / Lactase (1 of 5)									FALSE	TRUE		Cre12.g498550	Cre06.g308500
Cre04.g221450	6.33697	0.391278	16.1932	2.93772	-2.15371	-1.10683	0.31348	1059	Cre04.g221450.t1.2	NA	PF12499 - Pherophorin (DUF3707) (1 of 70)									FALSE	TRUE		Cre13.g592000	Cre09.g387689
Cre24.g755397	1.17159	0.735203	3.37712	2.17763	-2.15293	-1.1063	0.410328	1210	Cre24.g755397.t1.1	NA	NA									FALSE	TRUE		Cre10.g425400	Cre13.g607350
Cre15.g639850	1.56738	0.645012	4.3221	1.81492	-2.15225	-1.10585	0.353307	1113	Cre15.g639850.t1.2	NA	PTHR21228 - FAST LEU-RICH DOMAIN-CONTAINING (1 of 85)									FALSE	FALSE		Cre06.g308750	Cre15.g634800
Cre06.g282050	0.266881	0.119449	0.714363	0.180466	-2.15222	-1.10582	0.421175	1229	Cre06.g282050.t1.2	NA	NA									FALSE	FALSE		Cre02.g108800	Cre17.g698650
Cre09.g393432	0.6913	0.100271	1.91294	0.712003	-2.15176	-1.10552	0.393874	1182	Cre09.g393432.t1.1	NA	NA									FALSE	TRUE		Cre16.g682138	Cre01.g025350
Cre17.g726400	0.532114	0.392772	1.23036	0.29279	-2.14873	-1.10348	0.418621	1225	Cre17.g726400.t1.1	NA	K04710 - ceramide synthetase (CERS) (1 of 6)									FALSE	FALSE		Cre13.g590400	Cre17.g747397
Cre09.g388356	1.00404	0.789223	2.31554	0.930553	-2.14868	-1.10345	0.40702	1207	Cre09.g388356.t1.1	TBC2	Translation factor for chloroplast psbC mRNA									FALSE	FALSE		Cre03.g164950	Cre03.g159350
Cre17.g736618	0.296817	0.353823	0.54534	0.0407227	-2.14807	-1.10304	0.458842	1277	Cre17.g736618.t1.2	NA	NA									FALSE	FALSE		Cre17.g729500	Cre05.g243455
Cre09.g412650	1.10281	0.617421	2.7477	0.938685	-2.14761	-1.10273	0.369064	1138	Cre09.g412650.t1.1	NA	PTHR13244 - ZINC FINGER MYND DOMAIN CONTAINING PROTEIN 10 (1 of 16)									FALSE	FALSE		Cre03.g181550	Cre11.g476300
Cre11.g467583	0.120934	0.0478574	0.344464	0.116215	-2.14527	-1.10116	0.438043	1259	Cre11.g467583.t1.1	NA	PTHR16128:SF5 - FAD/NAD(P)-BINDING OXIDOREDUCTASE DOMAIN-CONTAINING PROTEIN (1 of 3)									FALSE	FALSE		Cre17.g703750	Cre03.g184700
Cre01.g025500	0.955649	0.600069	2.40813	0.916542	-2.14285	-1.09953	0.398307	1193	Cre01.g025500.t1.1	NA	PTHR19959//PTHR19959:SF135 - KINESIN LIGHT CHAIN // SUBFAMILY NOT NAMED (1 of 1)									FALSE	FALSE		Cre17.g708350	Cre16.g648850
Cre03.g171650	0.492782	0.335761	1.51562	1.20635	-2.14113	-1.09837	0.433105	1250	Cre03.g171650.t1.2	NA	PTHR18934:SF145 - ATP-DEPENDENT RNA HELICASE DHX57-RELATED (1 of 3)									FALSE	FALSE		Cre08.g380400	Cre06.g260150
Cre02.g078507	5.59483	2.54545	13.9197	2.52454	-2.14047	-1.09793	0.35632	1124	Cre02.g078507.t1.2	NA	PF13326 - Photosystem II Pbs27 (PSII_Pbs27) (1 of 3)									FALSE	FALSE		Cre08.g361850	Cre01.g000100
Cre02.g081650	0.958823	0.345056	2.60477	1.31826	-2.14017	-1.09773	0.389623	1183	Cre02.g081650.t1.2	NA	PTHR31515:SF3 - GENOMIC DNA, CHROMOSOME 3, BAC CLONE: T19N8 (1 of 1)									FALSE	FALSE		Cre17.g723250	Cre17.g720400
Cre01.g028900	0.573914	0.205263	1.76261	1.12935	-2.13995	-1.09758	0.418861	1232	Cre01.g028900.t1.1	NA	NA									FALSE	TRUE		Cre09.g402256	Cre11.g483400
Cre02.g089550	0	0	0.0367532	0.0330862	-2.13953	-1.0973	0.432377	1251	Cre02.g089550.t1.2/Cre02.g089550.t2.1	NA	NA									FALSE	TRUE		Cre11.g482750	Cre17.g717050
Cre12.g558353	0	0	0.0342716	0.0308522	-2.13953	-1.0973	0.446798	1271	Cre12.g558353.t1.1	NA	NA									FALSE	FALSE		Cre10.g437350	Cre10.g465300
Cre08.g360200	0	0	0.034087	0.0306861	-2.13953	-1.0973	0.466112	1292	Cre08.g360200.t1.2	DUR3	Urea active transporter									FALSE	FALSE		Cre03.g188500	Cre16.g690300
Cre07.g353750	0	0	0.0580846	0.0522893	-2.13953	-1.0973	0.468017	1293	Cre07.g353750.t1.2	MMP10	Metalloproteinase of VMP family									FALSE	TRUE		Cre16.g678100	Cre06.g293250
Cre05.g244052	0	0	0.0579447	0.0521633	-2.13953	-1.0973	0.484418	1331	Cre05.g244052.t1.1	NA	NA									FALSE	FALSE		Cre02.g080300	Cre12.g530600
Cre01.g050000	8.55736	2.60261	21.6342	3.3545	-2.13951	-1.09728	0.312612	1069	Cre01.g050000.t1.2	NA	PTHR31204:SF1 - TRANSMEMBRANE PROTEIN 97 (1 of 1)									FALSE	FALSE		Cre17.g723750	Cre09.g386800
Cre03.g145967	1.84896	1.08111	4.64247	1.96921	-2.13878	-1.09679	0.406192	1216	Cre03.g145967.t1.1	NA	PTHR11586:SF1 - NUCLEIC ACID-BINDING, OB-FOLD-LIKE PROTEIN (1 of 1)									FALSE	FALSE		Cre16.g650151	Cre17.g709651
Cre09.g387200	0.252306	0.0120157	0.692044	0.222203	-2.13865	-1.0967	0.410846	1227	Cre09.g387200.t1.1	CYG28	Adenylate/guanylate cyclase									FALSE	TRUE		Cre12.g535350	Cre01.g003550
Cre13.g606700	4.57072	0.616863	11.8904	3.2081	-2.13855	-1.09663	0.28644	1024	Cre13.g606700.t1.1	NA	NA									FALSE	TRUE		Cre07.g325730	Cre01.g051300
Cre16.g678000	6.53896	3.01869	17.9899	9.71944	-2.13841	-1.09654	0.356957	1129	Cre16.g678000.t1.2	NA	PF11891 - Domain of unknown function (DUF3411) (DUF3411) (1 of 4)									FALSE	FALSE		Cre03.g160000	Cre02.g080750
Cre07.g323600	8.03348	2.53073	21.3315	7.02986	-2.13811	-1.09634	0.352079	1123	Cre07.g323600.t1.1	NA	PF11317 - Protein of unknown function (DUF3119) (DUF3119) (1 of 1)									FALSE	FALSE		Cre11.g467692	Cre02.g074800
Cre12.g551800	20.4447	7.31205	56.93	31.8839	-2.13797	-1.09624	0.341324	1105	Cre12.g551800.t1.2	NA	PF00293 - NUDIX domain (NUDIX) (1 of 25)									FALSE	TRUE		Cre12.g501000	Cre05.g232300
Cre12.g522850	1.25163	0.637114	3.0798	1.29348	-2.13634	-1.09514	0.409375	1224	Cre12.g522850.t1.2	NA	K12835 - ATP-dependent RNA helicase DDX42 (DDX42, SF3B125) (1 of 1)									FALSE	FALSE		Cre09.g411751	Cre01.g044550
Cre10.g441250	1.54931	0.925159	3.71794	1.11415	-2.13517	-1.09435	0.394974	1194	Cre10.g441250.t1.2	NA	K19362 - transmembrane protein 231 (TMEM231) (1 of 1)									FALSE	FALSE		Cre17.g710000	Cre02.g141926
Cre01.g009350	7.29102	4.45589	21.2577	15.3304	-2.13488	-1.09415	0.392509	1190	Cre01.g009350.t1.2	AIH2	Agmatine iminohydrolase									TRUE	FALSE		Cre06.g277100	Cre13.g573950
Cre09.g391986	0.712895	0.0414622	2.19785	1.46073	-2.13438	-1.09382	0.407413	1220	Cre09.g391986.t1.1	NA	3.1.1.32 - Phospholipase A(1) / Phospholipase A1 (1 of 1)									FALSE	FALSE		Cre01.g035450	Cre13.g567600
Cre10.g430376	0.334538	0.272854	0.969509	0.461674	-2.13416	-1.09367	0.43538	1265	Cre10.g430376.t1.1	NA	NA									FALSE	FALSE		Cre16.g675200	Cre07.g337350
Cre06.g283000	0.306957	0.0378763	0.860084	0.323007	-2.13201	-1.09221	0.406957	1221	Cre06.g283000.t1.1	NA	NA									TRUE	FALSE		Cre02.g090650	Cre12.g543301
Cre11.g467788	0.26448	0.262109	0.752021	0.245377	-2.13177	-1.09205	0.44081	1274	Cre11.g467788.t1.1	NA	NA									FALSE	FALSE		Cre06.g253753	Cre13.g567363
Cre11.g467596	0.588715	0.0850576	1.71977	0.813938	-2.13165	-1.09197	0.397316	1206	Cre11.g467596.t1.1	NA	NA									FALSE	TRUE		Cre13.g579800	Cre16.g694207
Cre17.g715801	0.239542	0.0924789	0.677137	0.356726	-2.13157	-1.09192	0.401014	1213	Cre17.g715801.t1.2	NA	2.7.11.1 - Non-specific serine/threonine protein kinase / Threonine-specific protein kinase (1 of 543)									FALSE	TRUE		Cre09.g405600	Cre03.g200655
Cre09.g412450	0.0861894	0.0295851	0.278888	0.221054	-2.13117	-1.09164	0.43154	1263	Cre09.g412450.t1.1	NA	PTHR12585 - SCC1 / RAD21 FAMILY MEMBER (1 of 4)									FALSE	FALSE		Cre16.g649900	Cre09.g393991
Cre03.g176961	0.196029	0.115498	0.517075	0.193474	-2.13084	-1.09142	0.427016	1258	Cre03.g176961.t1.2	NA	2.7.11.1 - Non-specific serine/threonine protein kinase / Threonine-specific protein kinase (1 of 543)									FALSE	FALSE		Cre09.g416750	Cre03.g186250
Cre04.g222300	2.1764	0.967967	5.6143	1.95909	-2.12988	-1.09077	0.374389	1170	Cre04.g222300.t1.1	NA	PTHR12323 - SR-RELATED CTD ASSOCIATED FACTOR 6 (1 of 1)									FALSE	FALSE		Cre13.g588600	Cre07.g345950
Cre05.g244300	0.569817	0.290195	1.47332	0.691745	-2.12679	-1.08867	0.429021	1262	Cre05.g244300.t1.1	NA	NA									FALSE	TRUE		Cre13.g577600	Cre16.g655316
Cre12.g514200	0.777663	0.0832455	2.36577	1.53847	-2.1265	-1.08848	0.423209	1255	Cre12.g514200.t1.2	NA	PTHR11552 - GLUCOSE-METHANOL-CHOLINE GMC OXIDOREDUCTASE (1 of 1)									FALSE	TRUE		Cre12.g558600	Cre19.g750647
Cre02.g104725	0.333026	0.103896	0.868953	0.217972	-2.12605	-1.08817	0.415274	1240	Cre02.g104725.t1.1	NA	NA									FALSE	TRUE		Cre14.g629429	Cre16.g651250
Cre06.g279183	0.939835	0.603824	2.45426	1.27639	-2.12496	-1.08743	0.397913	1211	Cre06.g279183.t1.1	NA	PTHR15131 - SMALL NUCLEAR RNA ACTIVATING COMPLEX, POLYPEPTIDE 1 (1 of 1)									FALSE	TRUE		Cre04.g219787	Cre09.g386250
Cre09.g398178	0.193304	0.334812	0.844005	0.865494	-2.12414	-1.08688	0.501308	1379	Cre09.g398178.t1.1	NA	NA									FALSE	FALSE		Cre13.g579200	Cre10.g461150
Cre11.g467792	6.54656	2.96226	18.4623	9.64743	-2.12387	-1.0867	0.419961	1252	Cre11.g467792.t1.1	NA	NA									FALSE	FALSE		Cre10.g440450	Cre08.g368050
Cre01.g016150	3.28906	1.23841	8.82338	2.95555	-2.12266	-1.08587	0.401778	1223	Cre01.g016150.t1.2	NA	PTHR16222//PTHR16222:SF15 - ADP-RIBOSYLGLYCOHYDROLASE // SUBFAMILY NOT NAMED (1 of 1)									TRUE	FALSE		Cre09.g404350	Cre01.g042750
Cre10.g425251	2.48257	1.72473	6.33813	3.5715	-2.12223	-1.08558	0.399292	1219	Cre10.g425251.t1.1	NA	NA									FALSE	TRUE		Cre16.g674500	Cre17.g699750
Cre16.g688900	0.447117	0.087025	1.15747	0.356093	-2.12179	-1.08528	0.409177	1233	Cre16.g688900.t1.1	NA	NA									FALSE	TRUE		Cre17.g746547	Cre16.g669450
Cre06.g287300	3.26603	2.22403	7.85174	2.35059	-2.12088	-1.08466	0.389658	1200	Cre06.g287300.t1.2	NA	PTHR24188 - ANKYRIN REPEAT PROTEIN (1 of 19)									FALSE	TRUE		Cre01.g032100	Cre16.g692000
Cre16.g658200	0.549896	0.0938225	1.53571	0.832272	-2.11896	-1.08335	0.385203	1191	Cre16.g658200.t1.1	NA	PF13020 - Domain of unknown function (DUF3883) (DUF3883) (1 of 4)									FALSE	TRUE		Cre16.g683700	Cre06.g278220
Cre01.g036050	0.479582	0.0844755	1.28448	0.503649	-2.1179	-1.08263	0.409693	1242	Cre01.g036050.t1.1	MLH1	DNA mismatch repair protein									FALSE	FALSE		Cre03.g177300	Cre03.g195100
Cre12.g557050	0.947304	0.148236	2.78025	1.43497	-2.11769	-1.08249	0.425628	1266	Cre12.g557050.t1.2	CPLD8	Predicted protein									FALSE	TRUE		Cre16.g691552	Cre14.g617500
Cre03.g164350	6.01114	2.04636	15.4954	5.12038	-2.11669	-1.08181	0.388136	1198	Cre03.g164350.t1.1	NA	K06130 - lysophospholipase II (LYPLA2) (1 of 1)									TRUE	FALSE		Cre03.g185100	Cre24.g755397
Cre12.g490100	12.4282	6.57505	31.8171	12.4915	-2.11535	-1.08089	0.382892	1192	Cre12.g490100.t1.2	NA	Triose phosphate transporter									FALSE	TRUE		Cre07.g314200	Cre09.g394621
Cre14.g620300	6.88509	2.54544	17.8328	6.3275	-2.11527	-1.08084	0.373249	1180	Cre14.g620300.t1.2	ANS2	Anthranilate synthase, beta subunit									FALSE	FALSE		Cre06.g255900	Cre17.g714250
Cre15.g644051	5.14449	1.61588	13.5116	5.62567	-2.11455	-1.08035	0.371693	1176	Cre15.g644051.t1.1	NA	K03924 - MoxR-like ATPase (moxR) (1 of 2)									FALSE	TRUE		Cre10.g458100	Cre06.g271400
Cre03.g203500	0.853151	0.453801	1.89456	0.745524	-2.11438	-1.08024	0.415038	1253	Cre03.g203500.t1.2	NA	KOG0192//KOG1187 - Tyrosine kinase specific for activated (GTP-bound) p21cdc42Hs // Serine/threonine protein kinase (1 of 8)									FALSE	FALSE		Cre03.g190000	Cre01.g011850
Cre13.g603176	0.624676	0.271221	1.65738	0.677819	-2.11416	-1.08008	0.406138	1237	Cre13.g603176.t1.1	NA	PTHR23023:SF4 - FLAVIN-CONTAINING MONOOXYGENASE (1 of 2)									FALSE	FALSE		Cre02.g089050	Cre06.g252892
Cre06.g278133	0.189178	0.177124	0.446606	0.339685	-2.11359	-1.0797	0.456742	1306	Cre06.g278133.t1.1	NA	NA									FALSE	FALSE		Cre08.g358576	Cre02.g098400
Cre16.g662600	9.90431	5.60237	24.4435	8.73395	-2.11264	-1.07904	0.40607	1239	Cre16.g662600.t1.2	NA	PF01062 - Bestrophin, RFP-TM, chloride channel (Bestrophin) (1 of 10)									FALSE	TRUE		Cre09.g396401	Cre10.g460100
Cre14.g631600	0.102846	0.0903107	0.28936	0.0519298	-2.11228	-1.0788	0.471692	1329	Cre14.g631600.t1.2	NA	PTHR14239 - DUDULIN-RELATED (1 of 1)									FALSE	FALSE		Cre01.g029950	Cre13.g587400
Cre03.g168900	0.0253333	0.0438785	0.0851675	0.0330067	-2.11148	-1.07825	0.469631	1327	Cre03.g168900.t1.2	NA	PTHR23023:SF40 - DIMETHYLANILINE MONOOXYGENASE [N-OXIDE-FORMING] 1 (1 of 1)									FALSE	FALSE		Cre16.g692750	Cre09.g414150
Cre03.g164500	0.197649	0.342339	0.452373	0.43607	-2.11144	-1.07822	0.479661	1355	Cre03.g164500.t1.2	NA	NA									FALSE	FALSE		Cre03.g189100	Cre07.g329900
Cre17.g704700	0.0137386	0.023796	0.114091	0.12001	-2.11035	-1.07748	0.494348	1381	Cre17.g704700.t1.1	NA	PTHR12298 - PCDC2 PROGRAMMED CELL DEATH PROTEIN 2 -RELATED (1 of 39)									FALSE	FALSE		Cre01.g034600	Cre13.g605650
Cre06.g279150	6.61324	3.64924	18.2704	10.5026	-2.11032	-1.07747	0.415546	1260	Cre06.g279150.t1.2	NA	6.1.1.12 - Aspartate--tRNA ligase / Aspartyl-tRNA synthetase (1 of 2)									TRUE	FALSE		Cre03.g146607	Cre09.g387652
Cre01.g027400	0.842508	0.284101	2.07408	0.255279	-2.11029	-1.07744	0.397404	1230	Cre01.g027400.t1.1/Cre01.g027400.t2.1	NA	KOG4593 - Mitotic checkpoint protein MAD1 (1 of 5)									FALSE	FALSE		Cre12.g557950	Cre05.g234600
Cre16.g683750	6.44011	1.34492	16.9302	3.81069	-2.10973	-1.07706	0.389523	1214	Cre16.g683750.t1.2	CGL67	Putative peroxisomal membrane (22 kDa) family-related protein									FALSE	FALSE		Cre09.g396512	Cre13.g585651
Cre02.g142186	2.84476	0.963144	7.61283	2.78339	-2.1084	-1.07615	0.395711	1226	Cre02.g142186.t1.1	FTSZ2	Plastid division protein FtsZ2									FALSE	TRUE		Cre05.g234665	Cre04.g228000
Cre13.g582290	0.330471	0.155741	0.882335	0.340379	-2.10833	-1.0761	0.459636	1312	Cre13.g582290.t1.1	NA	NA									FALSE	FALSE		Cre03.g194300	Cre08.g358580
Cre12.g525550	0.879014	0.471263	2.24784	1.05121	-2.10402	-1.07315	0.430337	1286	Cre12.g525550.t1.2	NA	KOG3947 - Phosphoesterases (1 of 1)									FALSE	FALSE		Cre01.g017550	Cre15.g641527
Cre07.g318250	0.419084	0.109242	1.05855	0.0477838	-2.10358	-1.07285	0.427214	1283	Cre07.g318250.t1.1/Cre07.g318250.t2.1	NA	PTHR12197:SF138 - SET AND MYND DOMAIN-CONTAINING PROTEIN DDB_G0292140 (1 of 6)									FALSE	TRUE		Cre03.g148700	Cre17.g723700
Cre05.g236926	0.0357918	0.0354708	0.0974953	0.030689	-2.10314	-1.07255	0.473544	1343	Cre05.g236926.t1.2	NA	NA									FALSE	FALSE		Cre10.g421250	Cre03.g195050
Cre06.g300650	0.110775	0.0522048	0.373964	0.299865	-2.10314	-1.07254	0.446105	1307	Cre06.g300650.t1.2	NA	PTHR21373 - GLUCOSE REPRESSIBLE PROTEIN MAK10 (1 of 1)									FALSE	TRUE		Cre16.g661700	Cre10.g440950
Cre10.g466850	2.64946	1.524	5.71475	0.856818	-2.10308	-1.07251	0.446065	1308	Cre10.g466850.t1.1	FKB18	Peptidyl-prolyl cis-trans isomerase, FKBP-type									FALSE	TRUE		Cre12.g534300	Cre16.g695500
Cre16.g674850	0.175608	0.0535939	0.502777	0.264704	-2.10295	-1.07241	0.507055	1427	Cre16.g674850.t1.1	NA	PTHR14625 - MICROCEPHALIN (1 of 1)									FALSE	FALSE		Cre03.g199300	Cre13.g576150
Cre12.g535250	1.91938	1.03738	4.58477	0.0343842	-2.10223	-1.07192	0.41952	1273	Cre12.g535250.t1.1	NA	NA									FALSE	TRUE		Cre03.g144524	Cre05.g236650
Cre05.g237890	0.0333708	0.028908	0.269299	0.248887	-2.10188	-1.07168	0.479704	1363	Cre05.g237890.t1.1	NA	NA									FALSE	FALSE		Cre02.g146600	Cre14.g628200
Cre03.g199850	0	0	0.0488075	0.0500501	-2.09748	-1.06866	0.460643	1325	Cre03.g199850.t1.2	NA	NA									FALSE	FALSE		Cre02.g089100	Cre01.g015000
Cre06.g256550	0	0	0.0535515	0.0549149	-2.09748	-1.06866	0.464778	1334	Cre06.g256550.t1.1	NA	PTHR12393:SF6 - SPHINGOMYELIN PHOSPHODIESTERASE 2 (1 of 100)									TRUE	FALSE		Cre12.g513600	Cre14.g609800
Cre17.g740600	0	0	0.0327972	0.0336322	-2.09748	-1.06866	0.479179	1364	Cre17.g740600.t1.2/Cre17.g740600.t2.1	MOT50	Predicted protein									FALSE	FALSE		Cre09.g406650	Cre01.g030200
Cre16.g683954	0	0	0.291143	0.298556	-2.09748	-1.06866	0.505621	1428	Cre16.g683954.t1.1	NA	NA									FALSE	FALSE		Cre12.g530050	Cre09.g389700
Cre06.g257351	0.157362	0.206815	0.408284	0.3302	-2.09625	-1.06781	0.49451	1399	Cre06.g257351.t1.1	NA	NA									FALSE	TRUE		Cre07.g357200	Cre10.g427500
Cre16.g686789	1.1149	0.138698	3.13388	1.08228	-2.0959	-1.06757	0.437152	1300	Cre16.g686789.t1.2	NA	NA									FALSE	FALSE		Cre16.g683595	Cre16.g682150
Cre05.g230804	1.33879	0.177206	3.4692	0.790416	-2.0957	-1.06743	0.434981	1297	Cre05.g230804.t1.1	NA	NA									FALSE	FALSE		Cre01.g000250	Cre01.g047950
Cre16.g682138	0.0108433	0.0187811	0.0505892	0.0518772	-2.0955	-1.0673	0.503341	1424	Cre16.g682138.t1.1	NA	NA									TRUE	FALSE		Cre09.g393250	Cre13.g576600
Cre09.g389134	0.936042	0.318993	2.4293	0.936517	-2.09508	-1.067	0.4015	1248	Cre09.g389134.t1.1	NA	PF04577 - Protein of unknown function (DUF563) (DUF563) (1 of 14)									FALSE	TRUE		Cre15.g641750	Cre15.g643503
Cre10.g446500	1.32964	0.234836	3.50629	1.05333	-2.09495	-1.06692	0.410385	1267	Cre10.g446500.t1.1	NA	PTHR14241 - INTERFERON-INDUCED PROTEIN 44 (1 of 1)									FALSE	TRUE		Cre12.g498050	Cre13.g584750
Cre12.g544600	2.27441	0.759791	5.75255	0.870357	-2.09469	-1.06674	0.400578	1247	Cre12.g544600.t1.2	NA	NA									FALSE	FALSE		Cre06.g281650	Cre10.g434600
Cre01.g025808	0.479156	0.30292	1.21593	0.70283	-2.09456	-1.06665	0.44425	1310	Cre01.g025808.t1.1	NA	NA									FALSE	FALSE		Cre03.g200050	Cre02.g142600
Cre08.g358541	0.822368	0.278275	2.08702	0.890173	-2.09412	-1.06634	0.415531	1279	Cre08.g358541.t1.1	NA	NA									FALSE	FALSE		Cre10.g447000	Cre01.g003500
Cre01.g011630	0.0354017	0.0306672	0.212108	0.267444	-2.09409	-1.06632	0.466577	1342	Cre01.g011630.t1.1/Cre01.g011630.t2.1	NA	PTHR10334//PTHR10334:SF224 - CYSTEINE-RICH SECRETORY PROTEIN-RELATED // SUBFAMILY NOT NAMED (1 of 4)									FALSE	FALSE		Cre12.g540900	Cre12.g531500
Cre09.g401450	1.53498	0.268778	4.02135	1.01538	-2.09323	-1.06573	0.373424	1201	Cre09.g401450.t1.1	NA	NA									FALSE	FALSE		Cre05.g244950	Cre04.g219250
Cre12.g532327	1.52616	0.951416	4.25952	2.87749	-2.09322	-1.06572	0.460208	1336	Cre12.g532327.t1.2	NA	NA									FALSE	FALSE		Cre07.g336900	Cre12.g514650
Cre02.g094801	0.130484	0.0575402	0.490852	0.516526	-2.09271	-1.06537	0.454798	1326	Cre02.g094801.t1.1	NA	PTHR11319 - G PROTEIN-COUPLED RECEPTOR-RELATED (1 of 14)									FALSE	TRUE		Cre12.g505050	Cre08.g360150
Cre14.g626500	2.04163	0.946488	5.35347	2.68335	-2.09233	-1.06511	0.429712	1296	Cre14.g626500.t1.2	NA	PTHR22844 - F-BOX AND WD40 DOMAIN PROTEIN (1 of 15)									FALSE	FALSE		Cre06.g278185	Cre14.g632759
Cre16.g673650	35.5081	7.87419	89.9385	25.0636	-2.09187	-1.0648	0.405399	1261	Cre16.g673650.t1.1	LHCB5	Minor chlorophyll a/b binding protein of photosystem II									FALSE	FALSE		Cre07.g324200	Cre10.g448400
Cre16.g667300	0.0156459	0.0270995	0.0638757	0.024755	-2.09133	-1.06442	0.469335	1352	Cre16.g667300.t1.1	NA	NA									FALSE	FALSE		Cre15.g640651	Cre13.g591700
Cre12.g552851	1.02924	0.531161	2.74547	1.4452	-2.09097	-1.06417	0.445437	1315	Cre12.g552851.t1.1	NA	PTHR23083:SF397 - UDP-N-ACETYLGLUCOSAMINE--PEPTIDE N-ACETYLGLUCOSAMINYLTRANSFERASE SPINDLY-RELATED (1 of 1)									FALSE	FALSE		Cre14.g619050	Cre14.g620600
Cre10.g419950	3.80668	0.48769	9.6067	1.8158	-2.08981	-1.06337	0.398066	1249	Cre10.g419950.t1.1	NA	PF00536 - SAM domain (Sterile alpha motif) (SAM_1) (1 of 5)									FALSE	TRUE		Cre01.g048050	Cre16.g682450
Cre03.g183850	7.24978	4.96201	17.4868	4.97485	-2.08778	-1.06197	0.430705	1303	Cre03.g183850.t1.2	FDX6	Apoferredoxin									FALSE	FALSE		Cre04.g217000	Cre02.g073750
Cre06.g306035	2.08084	1.14459	4.96595	0.727252	-2.08727	-1.06162	0.429813	1301	Cre06.g306035.t1.1/Cre06.g306035.t2.1	NA	NA									FALSE	FALSE		Cre01.g002300	Cre01.g004750
Cre08.g362450	39.7297	24.1571	99.609	53.3482	-2.08559	-1.06045	0.409595	1275	Cre08.g362450.t1.2	AMA2	Alpha-amylase									FALSE	FALSE		Cre07.g327150	Cre03.g182200
Cre10.g449950	0.914685	0.277824	2.353	0.879841	-2.08393	-1.05931	0.415619	1287	Cre10.g449950.t1.2	NA	NA									FALSE	FALSE		Cre12.g547250	Cre01.g023650
Cre17.g705843	0.429734	0.395069	0.93535	0.323277	-2.08331	-1.05888	0.455559	1337	Cre17.g705843.t1.2	NA	PF06701 - Mib_herc2 (MIB_HERC2) (1 of 6)									FALSE	FALSE		Cre06.g302900	Cre04.g224300
Cre12.g547800	5.10783	1.4349	13.2888	4.77494	-2.0826	-1.05839	0.406035	1268	Cre12.g547800.t1.1	NA	PTHR10366:SF411 - HIGH CHLOROPHYLL FLUORESCENCE PHENOTYPE 173 PROTEIN (1 of 7)									FALSE	FALSE		Cre07.g335350	Cre14.g612950
Cre16.g693450	0.831285	0.119066	2.37375	1.28664	-2.08233	-1.0582	0.461364	1348	Cre16.g693450.t1.1	FAP40	Flagellar Associated Protein									FALSE	FALSE		Cre06.g260550	Cre09.g395769
Cre12.g546000	2.21734	1.4423	5.81514	3.15466	-2.0822	-1.05811	0.439785	1316	Cre12.g546000.t1.2	MRPL54	Putative mitochondrial ribosomal protein L54, imported to mitochondria									FALSE	FALSE		Cre09.g387150	Cre12.g561100
Cre14.g609300	0.121559	0.107175	0.291921	0.17446	-2.08212	-1.05805	0.467635	1358	Cre14.g609300.t1.2	NA	PTHR19288//PTHR19288:SF3 - 4-NITROPHENYLPHOSPHATASE-RELATED // SUBFAMILY NOT NAMED (1 of 1)									FALSE	FALSE		Cre01.g035900	Cre06.g306000
Cre09.g387171	5.6058	0.850195	14.9915	6.56885	-2.08207	-1.05802	0.408602	1280	Cre09.g387171.t1.1/Cre09.g387171.t2.1	NA	1.1.1.133 - dTDP-4-dehydrorhamnose reductase / dTDP-6-deoxy-L-mannose dehydrogenase (1 of 1)									TRUE	FALSE		Cre12.g517350	Cre02.g089608
Cre08.g359950	0.153843	0.266464	0.36826	0.355592	-2.08147	-1.0576	0.485411	1402	Cre08.g359950.t1.2	NA	NA									FALSE	FALSE		Cre16.g687600	Cre07.g346317
Cre10.g444100	1.01365	0.285073	2.927	1.6886	-2.08072	-1.05708	0.440834	1324	Cre10.g444100.t1.1	NA	PF04564//PF05049 - U-box domain (U-box) // Interferon-inducible GTPase (IIGP) (IIGP) (1 of 2)									TRUE	FALSE		Cre11.g482850	Cre02.g086800
Cre05.g238724	0.297387	0.300102	1.29906	1.14386	-2.07956	-1.05628	0.492873	1417	Cre05.g238724.t1.1	NA	PTHR15535 - TRANSMEMBRANE PROTEIN 2-RELATED (1 of 88)									FALSE	FALSE		Cre09.g406800	Cre05.g246900
Cre16.g651750	4.62549	1.93526	12.6413	6.79064	-2.07926	-1.05607	0.422097	1298	Cre16.g651750.t1.2	NA	K01870 - isoleucyl-tRNA synthetase (IARS, ileS) (1 of 2)									TRUE	FALSE		Cre16.g683500	Cre02.g094801
Cre09.g410050	2.40936	0.248215	6.73152	3.52818	-2.07866	-1.05566	0.414578	1290	Cre09.g410050.t1.2	NA	3.6.3.8 - Calcium-transporting ATPase / Calcium-translocating P-type ATPase (1 of 12)									FALSE	FALSE		Cre07.g351200	Cre12.g546027
Cre13.g604300	0.743941	0.384534	2.05769	1.0763	-2.07859	-1.0556	0.450359	1340	Cre13.g604300.t1.2	NA	NA									FALSE	FALSE		Cre02.g083800	Cre10.g422650
Cre06.g273050	2.33268	1.0214	5.79053	2.71029	-2.07837	-1.05545	0.443517	1333	Cre06.g273050.t1.2	CGLD10	Transcriptional regulator-like protein									FALSE	TRUE		Cre07.g315350	Cre17.g732450
Cre16.g688526	3.08077	0.535102	7.94395	2.2586	-2.07822	-1.05535	0.378226	1231	Cre16.g688526.t1.1	NA	PF00069//PF01846 - Protein kinase domain (Pkinase) // FF domain (FF) (1 of 1)									FALSE	FALSE		Cre12.g492600	Cre04.g226700
Cre14.g629650	3.16117	1.62934	8.00685	3.63518	-2.07659	-1.05422	0.432899	1314	Cre14.g629650.t1.1	NIK1	Nickel transporter									FALSE	TRUE		Cre09.g395800	Cre12.g552600
Cre02.g095142	0.0724322	0.0649814	0.303013	0.264311	-2.07472	-1.05291	0.4919	1420	Cre02.g095142.t1.1	NA	PTHR12298 - PCDC2 PROGRAMMED CELL DEATH PROTEIN 2 -RELATED (1 of 39)									FALSE	FALSE		Cre12.g483600	Cre08.g366900
Cre12.g505600	0.0631653	0.109406	0.35061	0.30616	-2.07332	-1.05194	0.521587	1499	Cre12.g505600.t1.2	HTB17	Histone H2B									FALSE	FALSE		Cre01.g044850	Cre06.g283100
Cre01.g002050	0.509634	0.0502035	1.32384	0.274029	-2.07166	-1.05078	0.473622	1377	Cre01.g002050.t1.1	NA	K01078 - acid phosphatase (E3.1.3.2) (1 of 1)									TRUE	FALSE		Cre03.g169550	Cre09.g397000
Cre05.g235950	4.15411	0.836222	12.7232	9.14448	-2.07066	-1.05009	0.445398	1345	Cre05.g235950.t1.2	NA	NA									FALSE	FALSE		Cre04.g215600	Cre09.g404050
Cre06.g294050	0.26455	0.0552143	0.678	0.119941	-2.07056	-1.05002	0.444336	1344	Cre06.g294050.t1.1	NA	PTHR22640:SF2 - STRUCTURAL MAINTENANCE OF CHROMOSOMES FLEXIBLE HINGE DOMAIN-CONTAINING PROTEIN 1 (1 of 2)									FALSE	FALSE		Cre07.g333950	Cre03.g186000
Cre17.g709500	2.81065	1.28671	7.36175	3.4307	-2.07004	-1.04966	0.433749	1328	Cre17.g709500.t1.1	NA	PTHR24055//PTHR24055:SF137 - MITOGEN-ACTIVATED PROTEIN KINASE // SUBFAMILY NOT NAMED (1 of 24)									FALSE	TRUE		Cre14.g633000	Cre10.g457400
Cre02.g085600	1.94187	1.03348	4.55178	1.48278	-2.06981	-1.04949	0.463999	1369	Cre02.g085600.t1.2	NA	PTHR22778 - OVARIAN CANCER GENE-2 PROTEIN-RELATED (1 of 5)									FALSE	FALSE		Cre02.g092550	Cre06.g295400
Cre03.g198224	0.137988	0.129196	0.349146	0.246093	-2.06957	-1.04933	0.476102	1385	Cre03.g198224.t1.1	NA	NA									TRUE	FALSE		Cre06.g310350	Cre16.g689300
Cre10.g426750	1.64858	0.686676	4.96433	3.73365	-2.06863	-1.04867	0.455926	1360	Cre10.g426750.t1.2	NA	Cytochrome P450, CYP120 superfamily									FALSE	TRUE		Cre03.g211969	Cre10.g420800
Cre12.g531450	0.56767	0.0420322	1.58306	0.738423	-2.06819	-1.04837	0.462623	1367	Cre12.g531450.t1.2	NA	NA									FALSE	FALSE		Cre12.g543050	Cre12.g556950
Cre17.g696650	2.10286	1.34113	4.7798	1.25514	-2.06639	-1.04711	0.43942	1341	Cre17.g696650.t1.1	NA	NA									FALSE	FALSE		Cre13.g603700	Cre13.g563300
Cre09.g392850	0.660396	0.108623	1.62385	0.168219	-2.06505	-1.04618	0.442086	1347	Cre09.g392850.t1.1	NA	NA									FALSE	FALSE		Cre06.g290350	Cre11.g479800
Cre13.g569150	8.19358	2.72961	21.5485	9.1358	-2.06472	-1.04595	0.414074	1302	Cre13.g569150.t1.2/Cre13.g569150.t2.1	NA	NA									FALSE	TRUE		Cre07.g331100	Cre09.g401900
Cre09.g404201	3.57708	1.37034	11.6922	10.7061	-2.06459	-1.04586	0.450165	1357	Cre09.g404201.t1.1	NA	PF12499 - Pherophorin (DUF3707) (1 of 70)									FALSE	FALSE		Cre04.g215150	Cre03.g153950
Cre08.g358571	0.124484	0.0727065	0.494168	0.547372	-2.06351	-1.0451	0.470913	1380	Cre08.g358571.t1.1	NA	4.6.1.2 - Guanylate cyclase / Guanylyl cyclase (1 of 72)									FALSE	TRUE		Cre01.g014100	Cre09.g397956
Cre03.g204577	0.193546	0.0974064	0.54101	0.294221	-2.06334	-1.04498	0.479323	1406	Cre03.g204577.t1.1	DNJ31	DnaJ-like protein									FALSE	TRUE		Cre09.g392000	Cre06.g278267
Cre17.g725650	2.49544	0.300345	6.46021	2.01015	-2.06289	-1.04466	0.43527	1338	Cre17.g725650.t1.1	NA	K03453 - bile acid:Na+ symporter, BASS family (TC.BASS) (1 of 2)									FALSE	TRUE		Cre12.g554850	Cre16.g684379
Cre02.g105650	2.15269	0.866941	5.45556	1.14969	-2.06281	-1.04461	0.440519	1349	Cre02.g105650.t1.2	NA	NA									FALSE	TRUE		Cre09.g394139	Cre12.g512650
Cre07.g337450	0.514235	0.146132	1.25309	0.308315	-2.06243	-1.04435	0.45763	1366	Cre07.g337450.t1.1	NA	PTHR12203 - KDEL LYS-ASP-GLU-LEU CONTAINING - RELATED (1 of 83)									FALSE	TRUE		Cre08.g382650	Cre17.g709500
Cre10.g425700	0.576431	0.264483	1.42372	0.477136	-2.06204	-1.04407	0.460065	1372	Cre10.g425700.t1.2	NA	K14301 - nuclear pore complex protein Nup107 (NUP107, NUP84) (1 of 1)									FALSE	FALSE		Cre08.g384864	Cre16.g657200
Cre02.g073650	12.6393	7.87728	30.8418	12.8476	-2.06141	-1.04363	0.44199	1354	Cre02.g073650.t1.2/Cre02.g073650.t2.1	PRP19	Spliceosome Component, nuclear pre-mRNA splicing factor									FALSE	FALSE		Cre07.g326500	Cre03.g180600
Cre13.g592350	0.339459	0.398764	0.66845	0.259381	-2.06072	-1.04315	0.481865	1419	Cre13.g592350.t1.2	NA	NA									FALSE	FALSE		Cre01.g029600	Cre06.g293300
Cre13.g570801	1.29886	0.200228	3.63397	1.67827	-2.0605	-1.04299	0.447494	1361	Cre13.g570801.t1.1	NA	NA									FALSE	FALSE		Cre12.g533250	Cre02.g077951
Cre08.g375700	0.216616	0.130678	0.700963	0.599109	-2.05865	-1.0417	0.51299	1491	Cre08.g375700.t1.1	NA	PTHR36732:SF1 - GLYCINE-RICH PROTEIN-RELATED (1 of 4)									FALSE	FALSE		Cre12.g502251	Cre02.g112550
Cre12.g531050	0.366232	0.170444	0.997761	0.558573	-2.05811	-1.04132	0.471118	1388	Cre12.g531050.t1.1	RAA3	PsaA mRNA maturation factor 3									FALSE	FALSE		Cre06.g301450	Cre08.g378100
Cre03.g154050	0	0	0.0922776	0.15983	-2.05761	-1.04097	0.48585	1435	Cre03.g154050.t1.2	NA	NA									FALSE	FALSE		Cre10.g425550	Cre03.g167300
Cre16.g681350	0	0	0.106851	0.185072	-2.05761	-1.04097	0.500953	1462	Cre16.g681350.t1.1	NA	NA									FALSE	FALSE		Cre03.g176250	Cre12.g485950
Cre09.g416300	2.09778	0.778671	5.95141	3.76768	-2.05706	-1.04058	0.451532	1368	Cre09.g416300.t1.1	NA	NA									FALSE	TRUE		Cre03.g189901	Cre01.g024750
Cre03.g148100	3.33426	1.06304	9.03737	4.50391	-2.05705	-1.04058	0.437715	1356	Cre03.g148100.t1.2	NA	PTHR10281:SF4 - NEUFERRICIN (1 of 1)									FALSE	FALSE		Cre13.g567750	Cre10.g448950
Cre03.g183400	4.69351	1.68453	11.603	3.33324	-2.05696	-1.04051	0.453343	1371	Cre03.g183400.t1.1	NA	PTHR36770:SF1 - CALCIUM HOMEOSTASIS REGULATOR-RELATED (1 of 1)									FALSE	TRUE		Cre07.g328050	Cre12.g484000
Cre12.g546550	0.253508	0.24804	0.416289	0.229505	-2.05692	-1.04048	0.476769	1409	Cre12.g546550.t1.1	FEA1	Fe-assimilating protein									FALSE	TRUE		Cre17.g721900	Cre17.g703450
Cre01.g003376	0.781507	0.570017	2.04963	1.32392	-2.05589	-1.03976	0.469059	1386	Cre01.g003376.t1.1	NA	K09522 - DnaJ homolog subfamily C member 2 (DNAJC2) (1 of 1)									FALSE	FALSE		Cre03.g172500	Cre12.g503450
Cre06.g249555	0.477616	0.357438	0.990704	0.0631867	-2.05469	-1.03892	0.470961	1398	Cre06.g249555.t1.2	NA	NA									FALSE	FALSE		Cre06.g258051	Cre01.g041150
Cre09.g399300	0.623345	0.252865	1.58171	0.441946	-2.05332	-1.03796	0.476714	1412	Cre09.g399300.t1.2	NA	Peptidyl-prolyl cis-trans isomerase, FKBP-type									FALSE	TRUE		Cre09.g401700	Cre09.g398900
Cre17.g719400	2.55089	0.697567	6.27909	2.93594	-2.05162	-1.03677	0.460215	1378	Cre17.g719400.t1.1	NA	PTHR13271 - UNCHARACTERIZED PUTATIVE METHYLTRANSFERASE (1 of 29)									FALSE	TRUE		Cre17.g713200	Cre17.g709000
Cre08.g369200	0.423249	0.287914	0.944033	0.532961	-2.05129	-1.03653	0.47351	1405	Cre08.g369200.t1.1	NA	2.7.11.1 - Non-specific serine/threonine protein kinase / Threonine-specific protein kinase (1 of 543)									FALSE	TRUE		Cre01.g043400	Cre01.g012000
Cre07.g356101	0.0234959	0.0253263	0.0563933	0.0218552	-2.05117	-1.03645	0.475071	1408	Cre07.g356101.t1.1	NA	NA									FALSE	FALSE		Cre10.g442300	Cre17.g723000
Cre11.g467665	1.47627	0.634462	3.93247	2.19264	-2.05088	-1.03625	0.436986	1359	Cre11.g467665.t1.1	NA	PF01833//PF10162 - IPT/TIG domain (TIG) // G8 domain (G8) (1 of 2)									FALSE	TRUE		Cre03.g161500	Cre03.g206452
Cre13.g580050	0.94254	0.179707	2.91054	2.05428	-2.05063	-1.03607	0.459019	1376	Cre13.g580050.t1.2/Cre13.g580050.t2.1	NA	PTHR23074:SF20 - GH08677P (1 of 2)									TRUE	FALSE		Cre12.g512450	Cre10.g430250
Cre13.g574100	0.980014	0.268888	2.44991	0.596405	-2.04965	-1.03537	0.465383	1387	Cre13.g574100.t1.1	NA	PTHR10994//PTHR10994:SF72 - RETICULON // SUBFAMILY NOT NAMED (1 of 6)									FALSE	TRUE		Cre14.g623850	Cre07.g325728
Cre07.g348100	0.807021	0.158291	2.20052	0.773733	-2.04891	-1.03486	0.477318	1422	Cre07.g348100.t1.2	NA	NA									FALSE	FALSE		Cre08.g370500	Cre03.g204300
Cre02.g104126	0.233163	0.176224	0.699758	0.653168	-2.04802	-1.03423	0.484107	1442	Cre02.g104126.t1.1	NA	NA									FALSE	TRUE		Cre03.g189250	Cre17.g747247
Cre07.g313950	1.6849	0.577443	4.3822	1.92166	-2.04737	-1.03377	0.468031	1397	Cre07.g313950.t1.1	NA	PF04577 - Protein of unknown function (DUF563) (DUF563) (1 of 14)									FALSE	TRUE		Cre13.g577500	Cre04.g230242
Cre02.g102800	1.47013	0.569578	4.18773	2.67269	-2.0466	-1.03323	0.477081	1423	Cre02.g102800.t1.2	RPB8	DNA-directed RNA polymerase II, 16.5 kDa polypeptide									FALSE	FALSE		Cre16.g683483	Cre01.g002700
Cre17.g712300	1.19196	0.4307	2.78998	0.490718	-2.04538	-1.03237	0.453676	1374	Cre17.g712300.t1.1	NA	NA									FALSE	FALSE		Cre16.g680900	Cre10.g462700
Cre06.g255800	0.0886088	0.0417587	0.240466	0.073204	-2.04532	-1.03233	0.481132	1438	Cre06.g255800.t1.1	NA	NA									FALSE	FALSE		Cre12.g540150	Cre01.g050650
Cre12.g541650	0.420048	0.225732	1.02369	0.282413	-2.04457	-1.03179	0.479916	1434	Cre12.g541650.t1.2/Cre12.g541650.t2.1	NA	NA									FALSE	FALSE		Cre06.g311700	Cre12.g513950
Cre12.g517250	1.79132	0.860205	4.39121	1.49205	-2.04272	-1.03049	0.473211	1413	Cre12.g517250.t1.1	NA	NA									FALSE	FALSE		Cre07.g320150	Cre08.g374550
Cre03.g176550	1.83719	0.985741	4.51014	1.79263	-2.04165	-1.02973	0.469098	1407	Cre03.g176550.t1.1	NA	K02516 - protein arginine N-methyltransferase 5 (PRMT5, HSL7) (1 of 1)									FALSE	TRUE		Cre05.g240000	Cre06.g296700
Cre14.g609750	0.661164	0.125318	1.65925	0.486911	-2.0416	-1.0297	0.471732	1414	Cre14.g609750.t1.1	NA	PF03351 - DOMON domain (DOMON) (1 of 6)									FALSE	FALSE		Cre03.g146507	Cre01.g017600
Cre11.g467557	0.27084	0.128097	0.715244	0.352523	-2.04015	-1.02867	0.47455	1418	Cre11.g467557.t1.1	NA	PTHR31389:SF4 - PROTEIN F32B4.1 (1 of 2)									TRUE	FALSE		Cre01.g017200	Cre17.g733300
Cre13.g587376	0.0730174	0.0918813	0.146247	0.0319039	-2.04005	-1.0286	0.502916	1485	Cre13.g587376.t1.1	NA	NA									FALSE	FALSE		Cre05.g245950	Cre06.g289750
Cre06.g278225	2.51817	1.16665	6.50939	3.13529	-2.03992	-1.02851	0.459851	1389	Cre06.g278225.t1.1	NA	PTHR22767:SF2 - NAT1 (1 of 1)									FALSE	FALSE		Cre10.g420950	Cre09.g395695
Cre10.g433650	0.138632	0.0260438	0.474701	0.372035	-2.0396	-1.02829	0.479573	1441	Cre10.g433650.t1.1	NA	PTHR22807 - NOP2 YEAST -RELATED NOL1/NOP2/FMU SUN DOMAIN-CONTAINING (1 of 5)									FALSE	FALSE		Cre07.g331962	Cre03.g179300
Cre06.g258226	2.2057	0.369865	5.59982	1.69821	-2.03879	-1.02772	0.452619	1384	Cre06.g258226.t1.1	NA	3.2.1.23 - Beta-galactosidase / Lactase (1 of 5)									FALSE	FALSE		Cre16.g674739	Cre12.g542627
Cre01.g044300	0.0463997	0.0401944	0.115477	0.0653172	-2.03795	-1.02712	0.519395	1529	Cre01.g044300.t1.2	NA	PTHR30570 - PERIPLASMIC PHOSPHATE BINDING COMPONENT OF PHOSPHATE ABC TRANSPORTER (1 of 3)									FALSE	FALSE		Cre07.g325744	Cre14.g623926
Cre16.g647950	1.75914	1.2445	4.05369	1.19015	-2.03749	-1.02679	0.475041	1425	Cre16.g647950.t1.1	NA	NA									FALSE	TRUE		Cre07.g336200	Cre17.g736000
Cre03.g193100	2.41858	1.3269	5.58737	0.993785	-2.03748	-1.02679	0.462378	1403	Cre03.g193100.t1.1	NA	NA									FALSE	TRUE		Cre01.g019950	Cre14.g630000
Cre12.g551350	2.67289	0.220449	7.15371	3.40086	-2.03615	-1.02584	0.458442	1390	Cre12.g551350.t1.2	NA	PTHR11803:SF13 - RIBONUCLEASE UK114 (1 of 2)									FALSE	FALSE		Cre07.g357750	Cre10.g426750
Cre02.g102750	0.951458	0.501448	2.22561	0.707435	-2.03581	-1.0256	0.476228	1432	Cre02.g102750.t1.1	NA	PTHR31646:SF1 - ALPHA-1,2-MANNOSYLTRANSFERASE MNN2 (1 of 2)									FALSE	FALSE		Cre16.g686285	Cre03.g151300
Cre14.g610351	1.17953	0.212548	3.29825	1.84942	-2.03548	-1.02537	0.477075	1439	Cre14.g610351.t1.1	NA	PTHR28234:SF1 - NUCLEAR CONTROL OF ATPASE PROTEIN 2 (1 of 1)									FALSE	FALSE		Cre07.g355900	Cre16.g675750
Cre10.g444650	1.06943	0.485395	2.6437	1.06121	-2.03415	-1.02443	0.468502	1415	Cre10.g444650.t1.1	NA	PTHR12618:SF5 - BROMO AND FHA DOMAIN-CONTAINING PROTEIN DDB_G0267958 (1 of 1)									FALSE	TRUE		Cre09.g396363	Cre05.g244200
Cre01.g042550	7.11322	2.79747	17.353	5.93795	-2.0329	-1.02354	0.456683	1395	Cre01.g042550.t1.1	NA	PTHR21573:SF0 - ER MEMBRANE PROTEIN COMPLEX SUBUNIT 1 (1 of 1)									FALSE	FALSE		Cre12.g560900	Cre17.g745097
Cre02.g106300	3.70813	1.67068	9.79197	5.24618	-2.03233	-1.02313	0.474656	1431	Cre02.g106300.t1.2	NA	PTHR12883 - ADIPOCYTE-SPECIFIC PROTEIN 4-RELATED (1 of 1)									FALSE	FALSE		Cre01.g014150	Cre02.g095119
Cre13.g562450	3.73205	2.63128	8.77155	3.55073	-2.03206	-1.02294	0.47998	1449	Cre13.g562450.t1.2	NA	Importin beta, RAN-binding protein 7,8									FALSE	FALSE		Cre13.g568850	Cre16.g695851
Cre06.g252200	3.97164	1.91328	10.1132	5.04699	-2.03174	-1.02272	0.473043	1429	Cre06.g252200.t1.2	TOC34	Translocon at the outer envelope membrane of chloroplasts, 75 kD									FALSE	FALSE		Cre06.g278259	Cre03.g208273
Cre12.g497650	1.08934	1.19265	1.83589	0.734147	-2.03157	-1.0226	0.485044	1459	Cre12.g497650.t1.2	THY28	Predicted protein									FALSE	FALSE		Cre03.g189400	Cre03.g151500
Cre12.g506900	1.0367	0.602502	2.51025	1.07121	-2.03119	-1.02233	0.482284	1452	Cre12.g506900.t1.2	NA	NA									FALSE	FALSE		Cre10.g426550	Cre11.g467560
Cre03.g201776	2.19231	0.416605	5.78581	2.5469	-2.02902	-1.02078	0.47206	1433	Cre03.g201776.t1.1	NA	PTHR12292 - RWD DOMAIN-CONTAINING PROTEIN (1 of 1)									FALSE	FALSE		Cre02.g101400	Cre16.g695450
Cre02.g089608	0.389517	0.0956364	1.09987	0.659415	-2.02892	-1.02072	0.475412	1443	Cre02.g089608.t1.2	NA	K11136 - regulator of telomere elongation helicase 1 [EC:3.6.4.12] (RTEL1) (1 of 1)									FALSE	TRUE		Cre09.g392750	Cre12.g519900
Cre07.g340900	4.49779	1.19766	10.9537	2.42606	-2.02854	-1.02044	0.464262	1416	Cre07.g340900.t1.2	NA	PTHR31223:SF11 - LOG FAMILY PROTEIN YJL055W (1 of 1)									TRUE	FALSE		Cre17.g725750	Cre08.g364501
Cre02.g095137	23.3869	22.7635	62.8128	64.3254	-2.02837	-1.02032	0.483683	1458	Cre02.g095137.t1.1/Cre02.g095137.t2.1	NA	Pyruvate-ferredoxin oxidoreductase									FALSE	FALSE		Cre15.g636250	Cre02.g103350
Cre01.g000700	0.777758	0.216279	1.9412	0.619837	-2.02831	-1.02028	0.476759	1445	Cre01.g000700.t1.1	NA	PTHR14155//PTHR14155:SF170 - RING FINGER DOMAIN-CONTAINING // SUBFAMILY NOT NAMED (1 of 2)									FALSE	FALSE		Cre07.g342800	Cre10.g444750
Cre03.g148700	4.71884	3.03093	10.9648	3.8731	-2.02654	-1.01902	0.48221	1456	Cre03.g148700.t1.2	NA	PF04720 - PDDEXK-like family of unknown function (PDDEXK_6) (1 of 15)									TRUE	FALSE		Cre12.g543450	Cre13.g572550
Cre03.g178075	0.427137	0.248241	1.20894	0.684361	-2.02592	-1.01858	0.485122	1466	Cre03.g178075.t1.1	NA	NA									FALSE	FALSE		Cre14.g634365	Cre11.g476850
Cre10.g460250	0.24993	0.252212	0.488175	0.241946	-2.02579	-1.01849	0.495951	1490	Cre10.g460250.t1.2	NA	NA									FALSE	FALSE		Cre04.g225400	Cre16.g677877
Cre14.g614100	8.91	4.76111	23.1842	12.8071	-2.02564	-1.01838	0.476163	1446	Cre14.g614100.t1.2	GTR26	Dolichyl-diphosphooligosaccharide-protein glycosyltransferase									TRUE	FALSE		Cre12.g509900	Cre10.g458800
Cre02.g075350	0.735861	0.366195	1.88949	1.00259	-2.0249	-1.01785	0.479776	1454	Cre02.g075350.t1.2/Cre02.g075350.t2.1/Cre02.g075350.t3.1	CNK1	NimA-related protein kinase									FALSE	FALSE		Cre07.g339950	Cre03.g187400
Cre16.g681700	0.212901	0.0101391	0.615413	0.30514	-2.02377	-1.01704	0.491383	1477	Cre16.g681700.t1.1/Cre16.g681700.t2.1/Cre16.g681700.t3.1	NUOS4b	NADH:ubiquinone oxidoreductase subunit									FALSE	FALSE		Cre12.g541800	Cre02.g119400
Cre10.g439400	2.73927	1.07064	6.61662	1.80968	-2.02374	-1.01703	0.476675	1448	Cre10.g439400.t1.1	GAT1	Glutamyl tRNA amidotransferase, subunit A									FALSE	FALSE		Cre03.g171387	Cre09.g386736
Cre17.g734789	0.149442	0.109731	0.360995	0.161157	-2.02354	-1.01688	0.487604	1474	Cre17.g734789.t1.1	NA	PF00560 - Leucine Rich Repeat (LRR_1) (1 of 8)									FALSE	FALSE		Cre11.g479700	Cre09.g411950
Cre08.g358521	0.338317	0.326894	0.686499	0.0437846	-2.02331	-1.01671	0.488264	1475	Cre08.g358521.t1.1	NA	NA									FALSE	FALSE		Cre03.g156350	Cre04.g229948
Cre02.g110600	1.35353	0.502973	3.36289	0.995016	-2.02227	-1.01597	0.478207	1451	Cre02.g110600.t1.2	DEG5	DegP-type protease									FALSE	TRUE		Cre12.g485400	Cre02.g114500
Cre02.g091500	0.322219	0.126772	0.816707	0.32732	-2.02201	-1.01579	0.481592	1463	Cre02.g091500.t1.1	NA	PTHR13595 - ARL6IP4 PROTEIN (1 of 1)									FALSE	FALSE		Cre03.g210513	Cre16.g649466
Cre09.g410750	0.838058	0.656785	2.56852	2.46243	-2.02155	-1.01546	0.489889	1479	Cre09.g410750.t1.2	NII1	Nitrite reductase									FALSE	FALSE		Cre13.g579450	Cre07.g347700
Cre10.g458850	2.00378	1.0816	5.09712	2.58587	-2.02124	-1.01524	0.484134	1468	Cre10.g458850.t1.2	NA	NA									FALSE	FALSE		Cre01.g035300	Cre11.g467597
Cre09.g410350	0.26213	0.0691685	0.724091	0.384908	-2.02086	-1.01497	0.494218	1496	Cre09.g410350.t1.1	NA	NA									FALSE	TRUE		Cre10.g454400	Cre04.g226600
Cre17.g731050	1.60424	0.582357	3.82971	0.948178	-2.02079	-1.01492	0.484729	1473	Cre17.g731050.t1.2	NA	PTHR12847:SF5 - CCR4-ASSOCIATED FACTOR 16 (1 of 1)									FALSE	FALSE		Cre09.g406900	Cre01.g046324
Cre12.g494650	1.08288	0.32014	2.59468	0.780954	-2.02052	-1.01473	0.475365	1450	Cre12.g494650.t1.1	NA	PTHR13078:SF14 - HYDROXYACYL-THIOESTER DEHYDRATASE TYPE 2, MITOCHONDRIAL (1 of 5)									FALSE	TRUE		Cre12.g507450	Cre14.g610700
Cre07.g337200	0.107306	0.18586	0.525698	0.669994	-2.02014	-1.01445	0.508362	1530	Cre07.g337200.t1.2	NA	NA									FALSE	FALSE		Cre03.g156600	Cre02.g145350
Cre16.g651950	0.0813278	0.0329912	0.235438	0.188888	-2.01997	-1.01434	0.49259	1492	Cre16.g651950.t1.2	NA	NA									FALSE	FALSE		Cre03.g202450	Cre05.g232500
Cre01.g038500	0.151937	0.154746	0.368165	0.172608	-2.01982	-1.01423	0.497756	1505	Cre01.g038500.t1.2	NA	Cytochrome P450, CYP197 superfamily, CYP197B family									FALSE	FALSE		Cre13.g579850	Cre17.g721250
Cre03.g207400	13.7456	6.94149	33.2843	14.6903	-2.01917	-1.01376	0.478497	1460	Cre03.g207400.t1.2	NA	PF13519 - von Willebrand factor type A domain (VWA_2) (1 of 10)									FALSE	TRUE		Cre07.g316000	Cre13.g588850
Cre08.g365750	0.122492	0.106255	0.260609	0.189441	-2.01874	-1.01346	0.502165	1513	Cre08.g365750.t1.1	NA	NA									FALSE	FALSE		Cre05.g234648	Cre02.g112050
Cre16.g674534	6.91285	2.72609	18.0017	8.84655	-2.01767	-1.01269	0.48073	1467	Cre16.g674534.t1.1	NA	PF07719//PF13414 - Tetratricopeptide repeat (TPR_2) // TPR repeat (TPR_11) (1 of 4)									FALSE	FALSE		Cre06.g260400	Cre10.g460150
Cre17.g725700	0.940128	0.283866	2.5783	1.41002	-2.01732	-1.01244	0.497991	1510	Cre17.g725700.t1.1/Cre17.g725700.t2.1/Cre17.g725700.t3.1	NA	NA									FALSE	TRUE		Cre06.g278097	Cre01.g045601
Cre10.g463500	0.657764	0.308214	1.8102	1.16207	-2.01657	-1.0119	0.490912	1493	Cre10.g463500.t1.1	NA	KOG0580//KOG0581//KOG0583 - Serine/threonine protein kinase // Mitogen-activated protein kinase kinase (MAP2K) // Serine/threonine protein kinase (1 of 2)									FALSE	TRUE		Cre12.g528400	Cre02.g074200
Cre07.g352300	0.230207	0.100624	0.656905	0.23556	-2.01643	-1.0118	0.502626	1519	Cre07.g352300.t1.2	NA	2.1.1.200 - tRNA (cytidine(32)/uridine(32)-2-O)-methyltransferase / TrMet(Xm32) (1 of 3)									FALSE	FALSE		Cre07.g326250	Cre16.g672753
Cre07.g338900	2.28534	1.19648	5.33568	1.55059	-2.01633	-1.01173	0.488524	1487	Cre07.g338900.t1.1	NA	PTHR12072:SF4 - CWF19-LIKE PROTEIN 1 (1 of 1)									FALSE	FALSE		Cre17.g721150	Cre08.g363650
Cre03.g173650	0.0195711	0.0338981	0.0905855	0.0815492	-2.01594	-1.01145	0.526666	1570	Cre03.g173650.t1.2	NA	PTHR12393:SF6 - SPHINGOMYELIN PHOSPHODIESTERASE 2 (1 of 100)									FALSE	FALSE		Cre09.g400516	Cre12.g490100
Cre15.g635067	5.04303	2.03058	12.1243	3.42008	-2.01578	-1.01134	0.486348	1483	Cre15.g635067.t1.1	NA	PTHR30570 - PERIPLASMIC PHOSPHATE BINDING COMPONENT OF PHOSPHATE ABC TRANSPORTER (1 of 3)									FALSE	TRUE		Cre12.g534000	Cre08.g360050
Cre06.g269801	1.28109	0.506146	3.53925	2.17978	-2.01574	-1.01131	0.486046	1482	Cre06.g269801.t1.1	NA	PTHR10566//PTHR10566:SF45 - CHAPERONE-ACTIVITY OF BC1 COMPLEX CABC1 -RELATED // SUBFAMILY NOT NAMED (1 of 2)									FALSE	FALSE		Cre02.g114850	Cre15.g639800
Cre16.g685613	0.0684916	0.0603871	0.191884	0.204399	-2.01546	-1.01111	0.499692	1514	Cre16.g685613.t1.1	NA	PF02689//PF05970 - Helicase (Herpes_Helicase) // PIF1-like helicase (PIF1) (1 of 1)									FALSE	FALSE		Cre02.g077100	Cre12.g543000
Cre13.g606350	1.36015	0.447109	3.54573	1.6808	-2.01495	-1.01074	0.479896	1471	Cre13.g606350.t1.1/Cre13.g606350.t2.1	NA	PF12816 - Golgi CORVET complex core vacuolar protein 8 (Vps8) (1 of 1)									TRUE	FALSE		Cre16.g663850	Cre17.g720150
Cre03.g171350	19.4783	13.3447	44.385	18.2415	-2.01448	-1.01041	0.489289	1497	Cre03.g171350.t1.2	SEC61A	SEC61-alpha subunit of ER-translocon									TRUE	FALSE		Cre07.g355950	Cre03.g192250
Cre14.g628752	1.61146	0.779594	3.77723	0.924152	-2.01444	-1.01038	0.491328	1502	Cre14.g628752.t1.1	NA	PTHR10165 - LIPID PHOSPHATE PHOSPHATASE (1 of 3)									FALSE	TRUE		Cre01.g039550	Cre11.g467652
Cre10.g438783	0.239987	0.0569196	0.578546	0.146889	-2.01443	-1.01037	0.486219	1486	Cre10.g438783.t1.1/Cre10.g438783.t2.1	NA	2.7.11.1 - Non-specific serine/threonine protein kinase / Threonine-specific protein kinase (1 of 543)									TRUE	FALSE		Cre10.g437900	Cre03.g187200
Cre02.g119484	0.14936	0.150724	0.541804	0.542513	-2.0144	-1.01035	0.502556	1524	Cre02.g119484.t1.2	NA	NA									FALSE	FALSE		Cre12.g540800	Cre04.g226400
Cre11.g477150	0.977029	0.324235	2.49639	1.07346	-2.01439	-1.01034	0.484016	1478	Cre11.g477150.t1.1	NA	PTHR18937 - STRUCTURAL MAINTENANCE OF CHROMOSOMES SMC FAMILY MEMBER (1 of 36)									FALSE	FALSE		Cre02.g106350	Cre03.g204900
Cre01.g014250	2.97914	1.22387	7.12075	1.66799	-2.01405	-1.0101	0.487115	1495	Cre01.g014250.t1.1	NA	NA									FALSE	TRUE		Cre09.g390467	Cre11.g481150
Cre01.g034100	1.47946	0.574962	3.65439	1.36572	-2.01397	-1.01004	0.48584	1488	Cre01.g034100.t1.1/Cre01.g034100.t2.1	NA	K01408 - insulysin (IDE, ide) (1 of 2)									FALSE	FALSE		Cre14.g614800	Cre08.g385900
Cre16.g657850	3.95751	2.05479	9.63525	3.80105	-2.01396	-1.01004	0.483487	1481	Cre16.g657850.t1.2	SEC63	ER-targeted preprotein translocase subunit									FALSE	FALSE		Cre16.g660750	Cre03.g158400
Cre07.g342552	3.7113	1.20796	9.29371	3.1016	-2.0126	-1.00906	0.488982	1503	Cre07.g342552.t1.1	NA	NA									TRUE	FALSE		Cre05.g234654	Cre11.g467556
Cre13.g568950	0.457434	0.236947	1.29679	0.848263	-2.01193	-1.00858	0.493824	1511	Cre13.g568950.t1.1	NA	3.6.1.19 - Nucleoside-triphosphate diphosphatase / Nucleoside-triphosphate pyrophosphatase (1 of 2)									FALSE	TRUE		Cre01.g034451	Cre06.g274050
Cre12.g503000	5.97861	3.05885	14.766	6.27965	-2.01105	-1.00795	0.486602	1501	Cre12.g503000.t1.2	NA	Glycerol-3-phosphate transporter, major facilitator superfamily									FALSE	FALSE		Cre09.g397100	Cre01.g051875
Cre06.g305950	0.112525	0.113552	0.523027	0.786232	-2.01053	-1.00758	0.518762	1562	Cre06.g305950.t1.2	NA	PTHR15535 - TRANSMEMBRANE PROTEIN 2-RELATED (1 of 88)									FALSE	FALSE		Cre16.g691500	Cre08.g382950
Cre03.g204800	1.47051	0.773096	3.89176	2.29782	-2.01031	-1.00742	0.492026	1508	Cre03.g204800.t1.2	NA	PTHR10803:SF3 - ATPASE ASNA1 (1 of 1)									TRUE	FALSE		Cre10.g446900	Cre11.g477250
Cre10.g428150	0.193153	0.0974775	0.537059	0.28166	-2.00962	-1.00693	0.496462	1517	Cre10.g428150.t1.1	NA	PTHR10566:SF58 - PROTEIN D2023.6 (1 of 1)									TRUE	FALSE		Cre12.g542850	Cre15.g635650
Cre12.g529350	1.41061	0.292852	3.52219	0.748852	-2.00899	-1.00647	0.492412	1512	Cre12.g529350.t1.1	NA	2.1.1.163//2.1.1.201 - Demethylmenaquinone methyltransferase / Demethylmenaquinone C-methylase (1 of 1)									FALSE	FALSE		Cre06.g294850	Cre02.g118350
Cre11.g468800	0.127918	0.124071	0.724643	0.79746	-2.00855	-1.00616	0.525745	1582	Cre11.g468800.t1.2	NA	2.7.11.1 - Non-specific serine/threonine protein kinase / Threonine-specific protein kinase (1 of 543)									FALSE	FALSE		Cre02.g094050	Cre10.g466850
Cre07.g356450	10.8297	5.05529	25.0895	6.05159	-2.00833	-1.006	0.490536	1507	Cre07.g356450.t1.1	NA	PTHR11017 - LEUCINE-RICH REPEAT-CONTAINING PROTEIN (1 of 25)									FALSE	FALSE		Cre08.g372400	Cre01.g009850
Cre02.g083450	4.35385	1.34223	10.1082	2.0294	-2.00802	-1.00577	0.489818	1506	Cre02.g083450.t1.1	NA	PTHR13789//PTHR13789:SF186 - MONOOXYGENASE // SUBFAMILY NOT NAMED (1 of 9)									FALSE	TRUE		Cre13.g586600	Cre17.g700100
Cre12.g530876	2.67671	1.42315	6.42042	2.1442	-2.00654	-1.00471	0.495545	1516	Cre12.g530876.t1.1	NA	NA									TRUE	FALSE		Cre05.g232200	Cre06.g290200
Cre09.g391400	0.0814663	0.113747	0.21887	0.189995	-2.00598	-1.00431	0.521451	1573	Cre09.g391400.t1.1	NA	2.7.11.1 - Non-specific serine/threonine protein kinase / Threonine-specific protein kinase (1 of 543)									FALSE	FALSE		Cre12.g560150	Cre09.g399300
Cre07.g354550	0.0846735	0.0427316	0.21986	0.0961109	-2.00585	-1.00422	0.497173	1527	Cre07.g354550.t1.1	FAP65	Flagellar Associated Protein									FALSE	TRUE		Cre10.g426950	Cre02.g084450
Cre10.g429100	14.8552	4.62499	37.4138	14.7372	-2.00491	-1.00354	0.493338	1515	Cre10.g429100.t1.2	NA	PTHR11451:SF21 - BIFUNCTIONAL GLUTAMATE/PROLINE--TRNA LIGASE (1 of 1)									TRUE	FALSE		Cre08.g379576	Cre12.g545101
Cre17.g697450	10.2968	6.60788	24.6081	10.8828	-2.00455	-1.00328	0.496521	1528	Cre17.g697450.t1.2	NA	K15029 - translation initiation factor 3 subunit L (EIF3L) (1 of 1)									FALSE	FALSE		Cre17.g700166	Cre12.g529150
Cre10.g452100	35.2391	17.6522	79.3559	21.8306	-2.00445	-1.00321	0.495674	1520	Cre10.g452100.t1.1	PSBY2	Ycf32-related polyprotein of photosystem II									FALSE	TRUE		Cre17.g745597	Cre09.g400850
Cre12.g544650	0.585838	0.511393	1.11137	0.559706	-2.00443	-1.00319	0.500631	1535	Cre12.g544650.t1.1	NA	PF13489 - Methyltransferase domain (Methyltransf_23) (1 of 9)									FALSE	FALSE		Cre01.g014850	Cre12.g495900
Cre05.g232752	1.00727	0.0495332	2.56032	0.834976	-2.00423	-1.00305	0.49635	1526	Cre05.g232752.t1.1	NA	PF08695 - Cytochrome oxidase complex assembly protein 1 (Coa1) (1 of 1)									FALSE	TRUE		Cre09.g389726	Cre12.g541850
Cre08.g382350	5.63454	1.4986	14.4467	6.20254	-2.00344	-1.00248	0.495683	1523	Cre08.g382350.t1.2	NA	PTHR11132//PTHR11132:SF101 - SOLUTE CARRIER FAMILY 35 // SUBFAMILY NOT NAMED (1 of 6)									FALSE	FALSE		Cre10.g437650	Cre06.g263300
Cre02.g101750	0.313938	0.154815	0.754606	0.193738	-2.00288	-1.00208	0.498902	1533	Cre02.g101750.t1.1	NA	PF04484 - Family of unknown function (DUF566) (DUF566) (1 of 1)									FALSE	FALSE		Cre13.g575500	Cre17.g737100
Cre01.g032450	1.61173	0.579026	3.99926	1.82857	-2.00274	-1.00198	0.497337	1531	Cre01.g032450.t1.2	NA	K06816 - golgi apparatus protein 1 (GLG1, ESL1) (1 of 4)									FALSE	TRUE		Cre04.g224500	Cre01.g001200
Cre07.g331401	0.275117	0.23143	0.680687	0.570307	-2.00239	-1.00172	0.499386	1537	Cre07.g331401.t1.1	NA	NA									FALSE	FALSE		Cre12.g510650	Cre03.g146127
Cre12.g552700	0.88743	0.10168	2.30409	1.00129	-2.0023	-1.00166	0.496725	1532	Cre12.g552700.t1.1	NA	PTHR19862:SF14 - WD REPEAT-CONTAINING PROTEIN 48 (1 of 20)									TRUE	FALSE		Cre12.g522700	Cre13.g583050
Cre09.g388350	1.39938	0.27514	4.55405	3.81825	-2.00211	-1.00152	0.498463	1534	Cre09.g388350.t1.1	MMP11	Metalloproteinase of VMP family									FALSE	FALSE		Cre02.g095900	Cre01.g000400
Cre06.g292249	31.372	8.03966	78.8569	35.2542	-2.0016	-1.00115	0.498041	1536	Cre06.g292249.t1.1	NA	PF12499 - Pherophorin (DUF3707) (1 of 70)									FALSE	FALSE		Cre07.g337850	Cre01.g050300
Cre03.g177150	0.0943966	0.0535716	0.283073	0.221705	-2.00012	-1.00009	0.503166	1544	Cre03.g177150.t1.2	NA	K17263 - cullin-associated NEDD8-dissociated protein 1 (CAND1) (1 of 2)									FALSE	FALSE		Cre03.g205137	Cre02.g083450
Cre09.g388550	2.60263	1.86739	5.53047	0.481815	-1.99916	-0.999393	0.500672	1541	Cre09.g388550.t1.2	MRPL21	Mitochondrial ribosomal protein L21									FALSE	FALSE		Cre13.g588550	Cre17.g718150
Cre07.g324150	0.350441	0.20028	0.978649	0.772959	-1.99828	-0.998758	0.50274	1546	Cre07.g324150.t1.1	NA	PF07173 - Protein of unknown function (DUF1399) (DUF1399) (1 of 10)									FALSE	TRUE		Cre01.g050150	Cre02.g093550
Cre03.g200350	0.443418	0.12571	1.216	0.712012	-1.99791	-0.998489	0.501426	1543	Cre03.g200350.t1.2/Cre03.g200350.t2.1	NA	PTHR10108//PTHR10108:SF706 - METHYLTRANSFERASE // SUBFAMILY NOT NAMED (1 of 1)									TRUE	FALSE		Cre16.g649150	Cre10.g458300
Cre17.g712100	1.97323	0.259767	4.99912	1.8883	-1.99734	-0.998081	0.502617	1547	Cre17.g712100.t1.2	NA	Pyridine nucleotide-disulphide oxidoreductase									FALSE	TRUE		Cre10.g436050	Cre08.g385600
Cre09.g395850	0.127878	0.174693	0.18519	0.0786522	-1.99632	-0.997341	0.517647	1577	Cre09.g395850.t1.2	NA	2.7.11.1 - Non-specific serine/threonine protein kinase / Threonine-specific protein kinase (1 of 543)									TRUE	FALSE		Cre12.g551250	Cre10.g424500
Cre12.g489350	0.449599	0.363292	0.895712	0.382696	-1.99631	-0.997337	0.502481	1545	Cre12.g489350.t1.1	NA	NA									FALSE	TRUE		Cre07.g319850	Cre06.g308000
Cre01.g047500	1.38532	0.507577	3.52823	1.56605	-1.99621	-0.997265	0.503494	1551	Cre01.g047500.t1.2	NA	PTHR23155 - LEUCINE-RICH REPEAT-CONTAINING PROTEIN (1 of 15)									FALSE	TRUE		Cre12.g499700	Cre02.g081850
Cre05.g237800	0.168499	0.157514	0.39122	0.248817	-1.99593	-0.99706	0.503463	1550	Cre05.g237800.t1.1	NA	4.6.1.2 - Guanylate cyclase / Guanylyl cyclase (1 of 72)									FALSE	FALSE		Cre03.g174050	Cre10.g445100
Cre12.g521750	1.28698	0.502903	3.3037	1.63805	-1.9958	-0.996969	0.503546	1552	Cre12.g521750.t1.2	NA	PF08801 - Nup133 N terminal like (Nucleoporin_N) (1 of 2)									FALSE	FALSE		Cre16.g652550	Cre12.g536550
Cre03.g199100	0.468592	0.252149	1.13068	0.368093	-1.9956	-0.996823	0.502842	1549	Cre03.g199100.t1.2	NA	NA									FALSE	TRUE		Cre16.g673150	Cre03.g179840
Cre11.g478750	5.47806	2.08211	14.6064	8.12219	-1.99545	-0.996715	0.503845	1553	Cre11.g478750.t1.2	NA	Peptidyl-prolyl cis-trans isomerase, FKBP-type									FALSE	FALSE		Cre06.g280750	Cre01.g023773
Cre01.g012750	4.0612	1.02764	10.2594	4.18836	-1.99494	-0.996346	0.50539	1555	Cre01.g012750.t1.1	NA	PF00520//PF12796 - Ion transport protein (Ion_trans) // Ankyrin repeats (3 copies) (Ank_2) (1 of 6)									FALSE	TRUE		Cre02.g085350	Cre14.g613750
Cre10.g461900	4.09391	3.01953	9.35185	4.12469	-1.99395	-0.995628	0.505382	1556	Cre10.g461900.t1.2	NA	PTHR11732:SF255 - ARYL-ALCOHOL DEHYDROGENASE YPL088W-RELATED (1 of 2)									FALSE	FALSE		Cre06.g302750	Cre12.g561350
Cre10.g422326	0.0897359	0.155427	0.512387	0.558796	-1.99323	-0.995108	0.526643	1605	Cre10.g422326.t1.1	NA	NA									FALSE	FALSE		Cre12.g523050	Cre07.g331200
Cre12.g522350	4.63492	2.3296	11.3153	4.52842	-1.99289	-0.994861	0.506682	1560	Cre12.g522350.t1.2	NA	6.1.1.2 - Tryptophan--tRNA ligase / Tryptophanyl-tRNA synthetase (1 of 2)									TRUE	FALSE		Cre04.g217300	Cre16.g673450
Cre03.g209729	0.0394373	0.0447864	0.0966808	0.0519073	-1.99231	-0.99444	0.505638	1558	Cre03.g209729.t1.1	NA	NA									TRUE	FALSE		Cre17.g737353	Cre04.g221450
Cre04.g215050	0.40902	0.365037	0.578827	0.135369	-1.992	-0.994217	0.508176	1564	Cre04.g215050.t1.2	NA	Beta-carotene hydroxylase, putative chloroplast precursor									FALSE	FALSE		Cre13.g607950	Cre01.g025400
Cre10.g445050	6.20134	2.08668	15.2871	5.84939	-1.99186	-0.994118	0.50884	1566	Cre10.g445050.t1.2	SLT3	Sodium/sulfate co-transporter									FALSE	FALSE		Cre04.g230144	Cre01.g041550
Cre13.g584650	0.310827	0.0768006	0.99102	0.741065	-1.99086	-0.993393	0.506168	1561	Cre13.g584650.t1.2	NA	NA									FALSE	FALSE		Cre12.g508550	Cre14.g616850
Cre12.g486252	0.382374	0.238104	0.924663	0.288214	-1.99075	-0.99331	0.505597	1559	Cre12.g486252.t1.1	NA	NA									FALSE	FALSE		Cre08.g383550	Cre10.g444850
Cre01.g028400	1.57297	0.676142	3.86272	1.65039	-1.99022	-0.992927	0.508932	1567	Cre01.g028400.t1.1	DDC1	Aromatic-aminoacid decarboxylase									FALSE	FALSE		Cre13.g565750	Cre11.g483250
Cre06.g278223	0.500118	0.27986	1.2129	0.433418	-1.99004	-0.992795	0.506342	1565	Cre06.g278223.t1.1	NA	NA									FALSE	FALSE		Cre12.g541352	Cre04.g214545
Cre06.g249750	2.30416	0.944154	5.58632	2.79743	-1.98804	-0.991347	0.511613	1574	Cre06.g249750.t1.1	NA	PF07382 - Histone H1-like nucleoprotein HC2 (HC2) (1 of 1)									TRUE	FALSE		Cre04.g212300	Cre09.g402108
Cre13.g586300	64.2197	38.1188	143.205	38.4257	-1.98751	-0.990966	0.516012	1590	Cre13.g586300.t1.2	FKB12	Peptidyl-prolyl cis-trans isomerase, FKBP-type									FALSE	TRUE		Cre10.g428650	Cre12.g524600
Cre12.g542000	0.0813083	0.0716872	0.218485	0.0805312	-1.98643	-0.990178	0.508013	1569	Cre12.g542000.t1.1/Cre12.g542000.t2.1	NA	3.1.1.96 - D-aminoacyl-tRNA deacylase / D-tyrosyl-tRNA(Tyr) aminoacylhydrolase (1 of 1)									FALSE	TRUE		Cre17.g739000	Cre15.g639700
Cre03.g184250	4.27915	2.22318	10.1338	3.35709	-1.98532	-0.989373	0.512072	1580	Cre03.g184250.t1.2	NA	PF13499 - EF-hand domain pair (EF-hand_7) (1 of 61)									FALSE	FALSE		Cre10.g441300	Cre01.g046650
Cre02.g143327	1.55625	0.655498	3.59334	0.521705	-1.98485	-0.98903	0.511471	1579	Cre02.g143327.t1.1	NA	NA									FALSE	TRUE		Cre07.g342050	Cre06.g278150
Cre02.g141246	0	0	0.276135	0.255206	-1.98482	-0.989011	0.546665	1653	Cre02.g141246.t1.1	NA	NA									FALSE	FALSE		Cre12.g527150	Cre03.g144031
Cre17.g719500	0.507435	0.209295	1.28334	0.533336	-1.98459	-0.98884	0.509607	1576	Cre17.g719500.t1.1	NA	1.3.99.29 - Phytoene desaturase (zeta-carotene-forming) / 2-step phytoene desaturase (1 of 2)									FALSE	FALSE		Cre03.g207800	Cre08.g370050
Cre09.g396250	2.09936	0.580509	5.03521	0.952529	-1.98435	-0.988666	0.51152	1585	Cre09.g396250.t1.2	VTE5	Phosphatidate cytidylyltransferase									FALSE	FALSE		Cre07.g356350	Cre17.g729050
Cre03.g174700	0.784531	0.266281	1.86686	0.14296	-1.983	-0.987687	0.50983	1584	Cre03.g174700.t1.1	NA	3.1.22.1 - Deoxyribonuclease II / Lysosomal DNase II (1 of 1)									TRUE	FALSE		Cre17.g729150	Cre07.g358050
Cre12.g529500	1.97742	1.21895	4.96059	3.01068	-1.98268	-0.987453	0.512272	1592	Cre12.g529500.t1.2	NA	K14857 - AdoMet-dependent rRNA methyltransferase SPB1 [EC:2.1.1.-] (SPB1, FTSJ3) (1 of 1)									FALSE	FALSE		Cre11.g478156	Cre09.g408000
Cre10.g433000	4.46041	1.63168	10.3153	2.33058	-1.98216	-0.987076	0.525738	1622	Cre10.g433000.t1.1	NA	K14164 - glycyl-tRNA synthetase (glyQS) (1 of 1)									FALSE	FALSE		Cre07.g354000	Cre08.g365720
Cre04.g217991	1.44535	0.845302	3.43001	1.43757	-1.98212	-0.987043	0.513956	1599	Cre04.g217991.t1.1	NA	PTHR14344 - WD REPEAT PROTEIN (1 of 1)									FALSE	TRUE		Cre16.g688450	Cre03.g194600
Cre08.g364600	1.07253	0.338163	2.66024	1.153	-1.98122	-0.986391	0.513339	1597	Cre08.g364600.t1.2	NA	NA									TRUE	FALSE		Cre02.g074626	Cre14.g619800
Cre03.g183900	3.43691	1.18973	8.82894	4.45914	-1.98054	-0.985896	0.510798	1591	Cre03.g183900.t1.2	NA	NA									FALSE	FALSE		Cre03.g164900	Cre04.g213873
Cre16.g689851	0.110482	0.0901107	0.233477	0.029767	-1.97807	-0.98409	0.512353	1596	Cre16.g689851.t1.1/Cre16.g689851.t2.1	NA	PF01822 - WSC domain (WSC) (1 of 21)									FALSE	FALSE		Cre10.g428050	Cre09.g399067
Cre16.g648300	1.66226	0.584724	4.62046	2.97898	-1.978	-0.984041	0.51759	1604	Cre16.g648300.t1.2	NA	PTHR11662:SF243 - ANION TRANSPORTER 6, CHLOROPLASTIC-RELATED (1 of 3)									FALSE	FALSE		Cre14.g617050	Cre02.g083300
Cre07.g317500	0.288301	0.0897922	0.745798	0.336158	-1.97651	-0.982954	0.522254	1619	Cre07.g317500.t1.1	NA	PTHR18937 - STRUCTURAL MAINTENANCE OF CHROMOSOMES SMC FAMILY MEMBER (1 of 36)									FALSE	FALSE		Cre06.g308400	Cre01.g021100
Cre01.g036600	3.04696	1.28316	7.21855	2.30387	-1.97582	-0.98245	0.518612	1608	Cre01.g036600.t1.2	NA	K14570 - RNA exonuclease 1 (REX1, REXO1, RNH70) (1 of 1)									FALSE	FALSE		Cre01.g023913	Cre07.g322550
Cre12.g533351	0.923049	0.406961	2.85248	2.16285	-1.97455	-0.981526	0.515445	1602	Cre12.g533351.t1.1	NA	K03695 - ATP-dependent Clp protease ATP-binding subunit ClpB (clpB) (1 of 3)									FALSE	FALSE		Cre16.g684100	Cre12.g558352
Cre17.g716625	0.194002	0.112749	0.504382	0.133243	-1.97344	-0.980711	0.515294	1603	Cre17.g716625.t1.1/Cre17.g716625.t2.1	NA	NA									FALSE	TRUE		Cre11.g467609	Cre08.g366000
Cre07.g333150	5.57553	1.46185	14.2321	6.60428	-1.97158	-0.979355	0.532655	1638	Cre07.g333150.t1.2	NA	NA									TRUE	FALSE		Cre09.g404700	Cre03.g195950
Cre12.g528300	3.11713	2.11274	6.70421	0.902317	-1.97155	-0.979333	0.525108	1626	Cre12.g528300.t1.1	NA	NA									FALSE	FALSE		Cre13.g605386	Cre24.g755497
Cre09.g395621	0.359849	0.193948	0.868726	0.373128	-1.97117	-0.97905	0.520629	1621	Cre09.g395621.t1.1	NA	PTHR10933 - IMMUNOGLOBULIN-BINDING PROTEIN 1 (1 of 1)									TRUE	FALSE		Cre05.g242301	Cre12.g509200
Cre05.g236850	0.295139	0.0740048	0.716334	0.278721	-1.97113	-0.979024	0.519171	1614	Cre05.g236850.t1.1	NA	2.7.11.1 - Non-specific serine/threonine protein kinase / Threonine-specific protein kinase (1 of 543)									FALSE	TRUE		Cre05.g245158	Cre03.g204150
Cre16.g674750	0.0535204	0.00665813	0.222263	0.220355	-1.9705	-0.978562	0.517077	1611	Cre16.g674750.t1.2	NA	PF01857 - Retinoblastoma-associated protein B domain (RB_B) (1 of 2)									FALSE	FALSE		Cre07.g334750	Cre10.g428664
Cre03.g177250	0.616972	0.261664	1.68106	1.01183	-1.97015	-0.978305	0.515947	1606	Cre03.g177250.t1.2	NA	Haloperoxidase-like protein									TRUE	FALSE		Cre09.g412750	Cre02.g095136
Cre01.g003950	1.58638	0.953293	4.21706	2.51836	-1.96986	-0.978096	0.525384	1631	Cre01.g003950.t1.1/Cre01.g003950.t2.1	NA	PTHR31600:SF2 - TINY MACROCYSTS PROTEIN B-RELATED (1 of 28)									FALSE	TRUE		Cre14.g624600	Cre07.g317750
Cre16.g659550	1.22416	0.347093	3.10608	1.30742	-1.96944	-0.977784	0.525091	1629	Cre16.g659550.t1.1/Cre16.g659550.t2.1/Cre16.g659550.t3.1	NA	2.4.1.228 - Lactosylceramide 4-alpha-galactosyltransferase / Histo-blood group P(k) UDP-galactose (1 of 3)									FALSE	FALSE		Cre12.g551802	Cre10.g455700
Cre08.g379850	0.302405	0.117445	0.754356	0.323053	-1.96923	-0.977631	0.522381	1624	Cre08.g379850.t1.2	NA	KOG0192//KOG1187 - Tyrosine kinase specific for activated (GTP-bound) p21cdc42Hs // Serine/threonine protein kinase (1 of 8)									FALSE	TRUE		Cre16.g690900	Cre01.g021550
Cre15.g643028	0.00911809	0.015793	0.0423729	0.0535493	-1.96906	-0.977507	0.519148	1620	Cre15.g643028.t1.1	NA	NA									FALSE	FALSE		Cre13.g575250	Cre12.g547651
Cre10.g426600	3.72712	1.43832	9.05417	3.24724	-1.96887	-0.977365	0.533061	1645	Cre10.g426600.t1.2	NA	Cytochrome P450, CYP213 superfamily									FALSE	TRUE		Cre01.g024050	Cre14.g613100
Cre08.g361750	1.1945	0.956329	2.97702	1.94078	-1.96813	-0.976826	0.517422	1618	Cre08.g361750.t1.1	NA	NA									FALSE	TRUE		Cre01.g040500	Cre14.g612700
Cre13.g587800	1.21867	0.335533	3.13888	1.54058	-1.96688	-0.975911	0.529552	1640	Cre13.g587800.t1.1	NA	NA									FALSE	FALSE		Cre04.g229163	Cre03.g192450
Cre09.g398808	2.49552	1.18915	5.79623	1.6077	-1.9648	-0.974385	0.544902	1669	Cre09.g398808.t1.1	NA	PF01465 - GRIP domain (GRIP) (1 of 2)									FALSE	FALSE		Cre10.g441550	Cre09.g409801
Cre16.g694942	0.149562	0.172839	0.375654	0.285905	-1.96317	-0.973184	0.519204	1623	Cre16.g694942.t1.2	NA	NA									FALSE	FALSE		Cre14.g610631	Cre01.g029400
Cre12.g518400	4.39586	1.50119	10.7173	3.30532	-1.9616	-0.97203	0.541117	1664	Cre12.g518400.t1.2	NA	NA									FALSE	TRUE		Cre06.g251600	Cre11.g480851
Cre16.g650200	0.819665	0.269555	2.82789	2.6235	-1.96122	-0.971748	0.522813	1633	Cre16.g650200.t1.1	NA	Mitochondrial substrate carrier protein, possible folate carrier									FALSE	FALSE		Cre02.g075600	Cre17.g707551
Cre02.g145950	6.36746	1.88359	15.5899	5.7892	-1.96117	-0.971711	0.54009	1662	Cre02.g145950.t1.2	NA	NA									FALSE	FALSE		Cre06.g258850	Cre02.g086100
Cre14.g616100	3.58667	2.35731	8.57978	4.64818	-1.96081	-0.97145	0.529659	1647	Cre14.g616100.t1.1	NA	Peptidyl-prolyl cis-trans isomerase, FKBP-type									FALSE	TRUE		Cre13.g561950	Cre01.g044250
Cre16.g671950	16.6456	6.11588	38.6049	11.8275	-1.96059	-0.971285	0.552013	1691	Cre16.g671950.t1.1	NA	NA									FALSE	TRUE		Cre04.g215650	Cre12.g537900
Cre02.g098650	1.89749	1.0158	4.72569	2.49387	-1.96051	-0.971226	0.520541	1627	Cre02.g098650.t1.1	NA	NA									FALSE	FALSE		Cre11.g483033	Cre07.g331650
Cre13.g574041	2.44204	1.13651	6.10417	3.21854	-1.96043	-0.971168	0.536221	1657	Cre13.g574041.t1.1	NA	PTHR10994//PTHR10994:SF72 - RETICULON // SUBFAMILY NOT NAMED (1 of 6)									FALSE	FALSE		Cre07.g351100	Cre03.g183700
Cre12.g547351	1.03639	0.300335	2.6218	1.29453	-1.96011	-0.970932	0.537468	1659	Cre12.g547351.t1.2	NA	4.6.1.2 - Guanylate cyclase / Guanylyl cyclase (1 of 72)									FALSE	FALSE		Cre05.g237950	Cre06.g302700
Cre03.g178200	0.757772	0.419171	1.80664	0.689312	-1.95918	-0.970252	0.523914	1634	Cre03.g178200.t1.1	NA	PF00118 - TCP-1/cpn60 chaperonin family (Cpn60_TCP1) (1 of 15)									FALSE	FALSE		Cre12.g486209	Cre09.g411633
Cre09.g390245	2.98586	1.6907	6.77868	2.05358	-1.95912	-0.970207	0.531691	1650	Cre09.g390245.t1.1	NA	NA									FALSE	FALSE		Cre02.g084100	Cre03.g199423
Cre07.g326950	3.08416	1.58709	7.52803	3.54645	-1.95847	-0.96973	0.538399	1666	Cre07.g326950.t1.1	NA	K15437 - aminoacyl tRNA synthase complex-interacting multifunctional protein 1 (AIMP1, ARC1) (1 of 2)									FALSE	FALSE		Cre12.g510300	Cre12.g546100
Cre08.g360850	0.337053	0.127988	0.962123	0.503567	-1.95701	-0.968653	0.529004	1649	Cre08.g360850.t1.2	NA	K18798 - protein AFG1 (AFG1, LACE1) (1 of 1)									TRUE	FALSE		Cre04.g213150	Cre08.g358531
Cre12.g536412	0.744676	0.533347	1.58407	0.237845	-1.95564	-0.967642	0.54005	1674	Cre12.g536412.t1.2	NA	NA									FALSE	FALSE		Cre08.g362700	Cre07.g332100
Cre14.g620200	1.61188	0.630627	3.82581	0.969148	-1.95487	-0.96707	0.537531	1665	Cre14.g620200.t1.1	NA	PF10998 - Protein of unknown function (DUF2838) (DUF2838) (1 of 2)									FALSE	FALSE		Cre11.g467524	Cre03.g177550
Cre02.g097150	4.42542	1.92811	10.9114	4.80438	-1.95452	-0.966816	0.551304	1695	Cre02.g097150.t1.2	NA	PF04749 - PLAC8 family (PLAC8) (1 of 12)									FALSE	TRUE		Cre07.g324600	Cre08.g366101
Cre03.g206200	0.833586	0.289408	1.94457	0.464566	-1.95398	-0.966413	0.555189	1708	Cre03.g206200.t1.1/Cre03.g206200.t2.1	NA	NA									FALSE	TRUE		Cre14.g608900	Cre07.g335650
Cre16.g649950	0.548574	0.316927	1.47172	0.910983	-1.95377	-0.96626	0.52357	1643	Cre16.g649950.t1.2	HFO40	Histone H4									FALSE	FALSE		Cre06.g310545	Cre17.g737351
Cre14.g609850	0.486944	0.471496	1.05163	0.797128	-1.95159	-0.964646	0.5246	1646	Cre14.g609850.t1.2	NA	NA									FALSE	TRUE		Cre12.g520650	Cre01.g046250
Cre04.g223300	0.782299	0.279064	1.91583	0.432325	-1.94935	-0.962992	0.529723	1655	Cre04.g223300.t1.2	CCP1	Low-CO2-inducible chloroplast envelope protein									FALSE	TRUE		Cre16.g658600	Cre06.g287850
Cre06.g254200	0.04569	0.0395796	0.161827	0.156261	-1.94901	-0.962741	0.549738	1698	Cre06.g254200.t1.2	NA	NA									FALSE	FALSE		Cre01.g020223	Cre12.g511640
Cre01.g038850	11.9062	5.62226	28.0742	11.6174	-1.94898	-0.96272	0.558223	1715	Cre01.g038850.t1.1	NA	PTHR24012:SF308 - PROTEIN Y55F3AM.3, ISOFORM A (1 of 1)									TRUE	FALSE		Cre01.g031300	Cre06.g297049
Cre10.g460350	1.09193	0.294752	2.84415	1.38084	-1.94887	-0.962635	0.542817	1687	Cre10.g460350.t1.1	NA	K13510 - lysophosphatidylcholine acyltransferase / lyso-PAF acetyltransferase (LPCAT1_2) (1 of 3)									FALSE	FALSE		Cre06.g278140	Cre06.g257200
Cre07.g329600	0.523838	0.137002	1.28355	0.314419	-1.94878	-0.962572	0.526371	1651	Cre07.g329600.t1.1/Cre07.g329600.t2.1	NA	PTHR12356 - NUCLEAR MOVEMENT PROTEIN NUDC (1 of 4)									FALSE	FALSE		Cre10.g461950	Cre01.g043750
Cre09.g388450	1.69988	0.368301	3.95506	1.21428	-1.94845	-0.96233	0.549858	1701	Cre09.g388450.t1.1	ELG29	Exostosin-like glycosyltransferase									FALSE	TRUE		Cre04.g219725	Cre13.g581150
Cre08.g385400	1.59291	0.111144	3.80472	1.04996	-1.94806	-0.962036	0.534736	1667	Cre08.g385400.t1.2/Cre08.g385400.t2.1	NA	3.5.1.1 - Asparaginase / L-asparagine amidohydrolase (1 of 3)									TRUE	FALSE		Cre11.g475500	Cre16.g696050
Cre12.g556653	0.242529	0.00807716	0.577211	0.086869	-1.94749	-0.961613	0.551349	1710	Cre12.g556653.t1.1	NA	NA									FALSE	TRUE		Cre10.g428692	Cre06.g293150
Cre16.g683081	2.56938	1.38008	5.94509	1.88972	-1.94693	-0.961198	0.527377	1654	Cre16.g683081.t1.1	NA	K09858 - SEC-C motif domain protein (K09858) (1 of 3)									TRUE	FALSE		Cre09.g396350	Cre02.g141000
Cre12.g539141	0.43956	0.310671	1.05801	0.533742	-1.94677	-0.961079	0.530486	1660	Cre12.g539141.t1.1	NA	NA									FALSE	FALSE		Cre08.g358554	Cre17.g746397
Cre04.g219300	0.546876	0.648371	1.55342	1.52352	-1.94671	-0.961039	0.528226	1656	Cre04.g219300.t1.2	NA	PF02958 - Ecdysteroid kinase (EcKinase) (1 of 1)									FALSE	FALSE		Cre02.g074600	Cre13.g607050
Cre10.g462750	1.49475	0.878017	3.55859	1.73249	-1.94582	-0.96038	0.534962	1672	Cre10.g462750.t1.1	NA	K11374 - elongator complex protein 2 (ELP2) (1 of 1)									FALSE	FALSE		Cre17.g732050	Cre12.g527850
Cre13.g569651	0	0	0.0499973	0.0865979	-1.94582	-0.960375	0.536395	1677	Cre13.g569651.t1.1	NA	NA									FALSE	FALSE		Cre01.g037950	Cre17.g698450
Cre15.g636750	3.20244	0.785724	7.80184	2.82737	-1.94558	-0.960202	0.548619	1704	Cre15.g636750.t1.2	NA	2.5.1.18 - Glutathione transferase / S-(hydroxyalkyl)glutathione lyase (1 of 15)									FALSE	TRUE		Cre10.g465500	Cre17.g718750
Cre10.g450550	0.71784	0.0920666	1.83953	0.761338	-1.9453	-0.959995	0.547007	1702	Cre10.g450550.t1.1	PAO3	Pheophorbide a oxygenase, Rieske iron-sulfur cluster protein									FALSE	TRUE		Cre09.g389023	Cre12.g548450
Cre17.g741500	0.303503	0.156027	0.732371	0.3374	-1.94467	-0.959525	0.536542	1682	Cre17.g741500.t1.1	NA	3.6.4.4 - Plus-end-directed kinesin ATPase / Kinesin (1 of 32)									FALSE	FALSE		Cre07.g323650	Cre12.g517050
Cre16.g680300	2.91841	0.73965	7.3444	3.51049	-1.94422	-0.959195	0.559004	1726	Cre16.g680300.t1.2	NA	2.3.1.43 - Phosphatidylcholine--sterol O-acyltransferase / Phospholipid--cholesterol acyltransferase (1 of 5)									FALSE	TRUE		Cre12.g501050	Cre07.g331350
Cre09.g386143	2.93437	1.38069	6.80637	2.64051	-1.94334	-0.958537	0.541809	1692	Cre09.g386143.t1.1	NA	NA									FALSE	FALSE		Cre06.g303500	Cre08.g383150
Cre03.g179450	0.929095	0.225759	2.34998	0.847901	-1.94323	-0.958455	0.538846	1688	Cre03.g179450.t1.1	SRR7	Scavenger receptor cysteine rich (SRCR) protein									FALSE	FALSE		Cre07.g344186	Cre13.g602650
Cre07.g337400	0.0968236	0.167703	0.275833	0.279841	-1.94303	-0.958308	0.533963	1676	Cre07.g337400.t1.2	NA	NA									FALSE	FALSE		Cre09.g400960	Cre10.g448750
Cre12.g537900	0.352888	0.228608	1.22359	1.33634	-1.94303	-0.958307	0.528823	1661	Cre12.g537900.t1.1	NA	PF11927 - Protein of unknown function (DUF3445) (DUF3445) (1 of 1)									FALSE	TRUE		Cre06.g250750	Cre10.g466200
Cre03.g203150	0.139626	0.0590343	0.342674	0.13171	-1.94263	-0.958012	0.532223	1671	Cre03.g203150.t1.1	NA	NA									FALSE	FALSE		Cre06.g263450	Cre07.g335600
Cre16.g652300	40.9921	26.3261	88.8344	29.9173	-1.94263	-0.958011	0.546305	1707	Cre16.g652300.t1.1	NA	Putative tubulin tyrosine ligase									FALSE	FALSE		Cre01.g009601	Cre10.g464500
Cre09.g404850	1.46701	0.99938	3.15809	0.932726	-1.94262	-0.958004	0.545564	1706	Cre09.g404850.t1.1	NA	NA									FALSE	FALSE		Cre01.g038250	Cre04.g224200
Cre04.g218900	0.0553545	0.0501963	0.122908	0.0583535	-1.94246	-0.957882	0.533529	1678	Cre04.g218900.t1.1	NA	PTHR10887//PTHR10887:SF333 - DNA2/NAM7 HELICASE FAMILY // SUBFAMILY NOT NAMED (1 of 2)									FALSE	FALSE		Cre16.g689201	Cre09.g397179
Cre07.g334800	4.10311	2.71531	10.4031	6.41733	-1.94205	-0.957582	0.544929	1703	Cre07.g334800.t1.2/Cre07.g334800.t2.1	FDX4	Ferredoxin									FALSE	FALSE		Cre11.g482952	Cre17.g747847
Cre15.g641976	0.732904	0.262126	1.85886	0.716073	-1.94195	-0.957505	0.531027	1673	Cre15.g641976.t1.2	NA	NA									FALSE	FALSE		Cre03.g161606	Cre03.g161150
Cre17.g747497	2.87468	0.541472	6.67618	1.38106	-1.94158	-0.957228	0.569936	1757	Cre17.g747497.t1.1	NA	NA									FALSE	FALSE		Cre08.g384850	Cre01.g015300
Cre03.g158700	0.385567	0.249701	0.879386	0.324671	-1.94146	-0.957142	0.53229	1679	Cre03.g158700.t1.2	NA	NA									FALSE	FALSE		Cre12.g488850	Cre16.g654950
Cre26.g756747	0.349714	0.297069	1.25536	0.95288	-1.9414	-0.957094	0.532502	1681	Cre26.g756747.t1.1	NA	NA									FALSE	FALSE		Cre14.g615400	Cre02.g095126
Cre13.g575200	0.251126	0.179721	0.496661	0.162304	-1.94124	-0.95698	0.530308	1675	Cre13.g575200.t1.1	NA	KOG0374 - Serine/threonine specific protein phosphatase PP1, catalytic subunit (1 of 4)									FALSE	FALSE		Cre07.g314833	Cre17.g701150
Cre09.g401000	0.144748	0.0068934	0.371006	0.127018	-1.94018	-0.956193	0.531689	1680	Cre09.g401000.t1.1	NA	UDP-N-acetylglucosamine/UDP-glucose 4-epimerase									FALSE	FALSE		Cre09.g393136	Cre13.g565200
Cre06.g262050	5.73917	1.31788	13.6057	4.0649	-1.9392	-0.955463	0.586737	1788	Cre06.g262050.t1.2	AEP1	Aldose-1-epimerase									FALSE	TRUE		Cre06.g284000	Cre05.g243900
Cre13.g564583	0.102628	0.0307035	0.270653	0.15954	-1.93857	-0.954991	0.533866	1685	Cre13.g564583.t1.1/Cre13.g564583.t2.1	NA	NA									FALSE	FALSE		Cre16.g674627	Cre01.g022700
Cre03.g212081	2.66955	1.66668	5.85644	2.54959	-1.93818	-0.9547	0.550021	1723	Cre03.g212081.t1.1	NA	NA									FALSE	FALSE		Cre16.g690543	Cre07.g353650
Cre16.g672721	0.512436	0.166125	1.23433	0.485916	-1.93764	-0.9543	0.534805	1689	Cre16.g672721.t1.1	NA	NA									FALSE	FALSE		Cre12.g544112	Cre12.g524500
Cre12.g503650	1.11594	0.512251	2.84349	1.59284	-1.93671	-0.95361	0.539014	1699	Cre12.g503650.t1.2	NA	PTHR10108//PTHR10108:SF894 - METHYLTRANSFERASE // SUBFAMILY NOT NAMED (1 of 1)									FALSE	FALSE		Cre03.g159700	Cre16.g689600
Cre11.g483100	0.872789	0.320307	2.13894	1.00401	-1.93654	-0.953482	0.548408	1722	Cre11.g483100.t1.1	NA	PTHR23257//PTHR23257:SF513 - SERINE-THREONINE PROTEIN KINASE // SUBFAMILY NOT NAMED (1 of 40)									TRUE	FALSE		Cre06.g295050	Cre17.g741750
Cre12.g556905	0.505947	0.530542	0.892163	0.0558818	-1.93588	-0.952992	0.531728	1684	Cre12.g556905.t1.2	NA	NA									FALSE	FALSE		Cre09.g396900	Cre03.g165250
Cre03.g184900	0.417658	0.0987429	1.02892	0.437761	-1.93527	-0.952536	0.561383	1748	Cre03.g184900.t1.2	NA	NA									TRUE	FALSE		Cre06.g267800	Cre11.g467755
Cre08.g380201	0.919638	0.564106	2.46915	1.76641	-1.93496	-0.952307	0.541401	1712	Cre08.g380201.t1.1	NA	1.1.1.25 - Shikimate dehydrogenase / Shikimate:NADP(+) oxidoreductase (1 of 1)									FALSE	FALSE		Cre03.g200200	Cre03.g143827
Cre12.g492450	1.64693	0.447018	4.07502	1.85096	-1.93402	-0.951604	0.567172	1759	Cre12.g492450.t1.2	NA	PTHR18934:SF145 - ATP-DEPENDENT RNA HELICASE DHX57-RELATED (1 of 3)									FALSE	FALSE		Cre17.g719000	Cre13.g563476
Cre09.g389763	4.32476	1.86994	10.6974	5.16745	-1.93385	-0.951476	0.538771	1700	Cre09.g389763.t1.1	NA	NA									FALSE	FALSE		Cre05.g238311	Cre10.g460700
Cre06.g255700	1.56335	0.392658	4.18179	2.48103	-1.93329	-0.951055	0.559166	1746	Cre06.g255700.t1.1	NA	NA									FALSE	FALSE		Cre07.g340050	Cre16.g668800
Cre03.g177950	0.499714	0.0317685	1.16428	0.20498	-1.93224	-0.950271	0.557829	1741	Cre03.g177950.t1.1	NA	PTHR32093:SF10 - MUCIN 14A (1 of 1)									FALSE	FALSE		Cre10.g440250	Cre08.g360100
Cre13.g602950	1.26527	0.498407	3.15116	1.4751	-1.93103	-0.949368	0.570551	1766	Cre13.g602950.t1.1/Cre13.g602950.t2.1	NA	PF00149 - Calcineurin-like phosphoesterase (Metallophos) (1 of 33)									FALSE	TRUE		Cre01.g010100	Cre09.g386949
Cre07.g357250	1.32274	0.0852602	3.22555	1.13986	-1.93079	-0.949191	0.551477	1738	Cre07.g357250.t1.1	NA	PTHR24188//PTHR24188:SF41 - ANKYRIN REPEAT PROTEIN // SUBFAMILY NOT NAMED (1 of 1)									TRUE	FALSE		Cre06.g310800	Cre02.g095103
Cre08.g374000	0.218502	0.239325	0.718003	0.839312	-1.93053	-0.948994	0.535036	1696	Cre08.g374000.t1.2	NA	PF10444 - Nbl1 / Borealin N terminal (Nbl1_Borealin_N) (1 of 1)									FALSE	FALSE		Cre11.g467527	Cre09.g388060
Cre12.g541211	2.38315	0.68891	5.77156	2.14227	-1.93034	-0.948857	0.578031	1778	Cre12.g541211.t1.1/Cre12.g541211.t2.1/Cre12.g541211.t3.1	NA	2.7.11.1 - Non-specific serine/threonine protein kinase / Threonine-specific protein kinase (1 of 543)									TRUE	FALSE		Cre11.g467770	Cre03.g146267
Cre10.g461050	24.5105	13.2355	55.4631	20.3617	-1.93001	-0.948607	0.581539	1784	Cre10.g461050.t1.2	ATPvA1	Vacuolar ATP synthase subunit A									TRUE	FALSE		Cre03.g148300	Cre04.g216550
Cre03.g197650	2.47938	1.39094	6.64792	4.55353	-1.92977	-0.948429	0.540222	1717	Cre03.g197650.t1.2	NA	PF04755 - PAP_fibrillin (PAP_fibrillin) (1 of 16)									FALSE	FALSE		Cre03.g169500	Cre16.g657150
Cre10.g457050	3.18444	0.647663	7.67452	2.3171	-1.92977	-0.948427	0.576588	1779	Cre10.g457050.t1.1	NA	2.7.11.1 - Non-specific serine/threonine protein kinase / Threonine-specific protein kinase (1 of 543)									TRUE	FALSE		Cre14.g611850	Cre11.g478184
Cre10.g445100	3.60418	1.16677	8.41544	1.98665	-1.9294	-0.948152	0.571185	1772	Cre10.g445100.t1.1	CGL50	Predicted protein									FALSE	TRUE		Cre06.g278258	Cre07.g338550
Cre04.g220550	0.46905	0.143315	1.10078	0.441223	-1.92759	-0.946795	0.566782	1764	Cre04.g220550.t1.2	NA	NA									FALSE	FALSE		Cre10.g436950	Cre17.g700700
Cre03.g195200	0.96097	0.393405	2.2098	0.228818	-1.92734	-0.946615	0.548949	1737	Cre03.g195200.t1.2	NA	Haloalkane dehalogenase-like hydrolase									FALSE	TRUE		Cre17.g722700	Cre17.g706700
Cre01.g003475	0.020586	0.035656	0.0982994	0.124227	-1.92569	-0.945379	0.53635	1709	Cre01.g003475.t1.1	NA	3.4.24.35 - Gelatinase B / Type V collagenase (1 of 2)									FALSE	TRUE		Cre03.g156500	Cre04.g211900
Cre13.g579000	0.59631	0.28376	1.3842	0.502045	-1.92548	-0.945218	0.554529	1753	Cre13.g579000.t1.1	NA	NA									FALSE	TRUE		Cre17.g722050	Cre14.g632250
Cre10.g432150	2.47331	1.09678	6.07702	2.90398	-1.9252	-0.945011	0.56735	1767	Cre10.g432150.t1.2	NA	K08824 - cyclin-dependent kinase-like [EC:2.7.11.22] (CDKL) (1 of 18)									FALSE	FALSE		Cre06.g281950	Cre09.g400750
Cre12.g499205	1.12495	0.547417	2.50285	0.810036	-1.92437	-0.944388	0.550913	1740	Cre12.g499205.t1.1/Cre12.g499205.t2.1	NA	NA									FALSE	FALSE		Cre07.g337100	Cre14.g619500
Cre01.g024750	1.07953	0.443666	2.73304	1.46576	-1.92429	-0.94433	0.552941	1752	Cre01.g024750.t1.1	NA	PF00059//PF07714//PF14295 - Lectin C-type domain (Lectin_C) // Protein tyrosine kinase (Pkinase_Tyr) // PAN domain (PAN_4) (1 of 3)									FALSE	TRUE		Cre06.g282550	Cre16.g682550
Cre01.g045601	0.920895	0.421342	2.04416	0.594601	-1.92354	-0.943766	0.582357	1796	Cre01.g045601.t1.2	NA	K13912 - deleted in malignant brain tumors 1 protein (DMBT1) (1 of 2)									FALSE	TRUE		Cre09.g388400	Cre09.g387100
Cre13.g578900	0.549163	0.29932	1.91694	2.13577	-1.92288	-0.943272	0.54083	1727	Cre13.g578900.t1.2	NA	NA									FALSE	FALSE		Cre06.g304850	Cre16.g680650
Cre07.g348800	2.82638	1.91119	6.22858	2.21061	-1.92126	-0.942052	0.565126	1765	Cre07.g348800.t1.1	NA	PTHR21228 - FAST LEU-RICH DOMAIN-CONTAINING (1 of 85)									FALSE	FALSE		Cre16.g668552	Cre10.g451100
Cre26.g756597	0.986601	0.595588	2.34647	1.22015	-1.92125	-0.942045	0.544332	1733	Cre26.g756597.t1.1	NA	NA									FALSE	FALSE		Cre04.g213152	Cre03.g201450
Cre14.g614050	0.935754	0.48625	2.23264	0.874938	-1.9211	-0.941934	0.539889	1725	Cre14.g614050.t1.1	NA	K16732 - protein regulator of cytokinesis 1 (PRC1) (1 of 1)									FALSE	FALSE		Cre12.g551900	Cre14.g633900
Cre03.g205249	0.338748	0.277532	0.699818	0.223902	-1.91987	-0.941008	0.539647	1724	Cre03.g205249.t1.1	NA	PTHR24115:SF451 - KINESIN-LIKE PROTEIN SUBITO (1 of 1)									FALSE	FALSE		Cre02.g086326	Cre07.g358001
Cre05.g246100	2.88693	0.583522	6.86955	2.26527	-1.91873	-0.940154	0.556889	1761	Cre05.g246100.t1.2	NA	NA									FALSE	FALSE		Cre06.g298700	Cre17.g721850
Cre16.g655100	0.614117	0.299394	1.41182	0.314896	-1.91845	-0.939943	0.54868	1750	Cre16.g655100.t1.1	NA	PTHR12963 - THYROID RECEPTOR INTERACTING PROTEIN RELATED (1 of 1)									FALSE	TRUE		Cre09.g406983	Cre02.g095069
Cre03.g162200	0.168303	0.0955147	0.41517	0.116794	-1.91753	-0.939251	0.539751	1729	Cre03.g162200.t1.2	NA	NA									FALSE	FALSE		Cre07.g344300	Cre16.g680150
Cre01.g024601	0.212099	0.107039	0.57594	0.257249	-1.91739	-0.939145	0.539816	1731	Cre01.g024601.t1.1	NA	NA									FALSE	FALSE		Cre02.g108750	Cre12.g545177
Cre03.g195450	0.317137	0.159606	0.732023	0.0663303	-1.91718	-0.938989	0.547492	1749	Cre03.g195450.t1.1	POC11	Centriole proteome protein									TRUE	FALSE		Cre12.g515700	Cre02.g116100
Cre12.g503850	0.343324	0.0343391	0.844234	0.189091	-1.91705	-0.938892	0.56602	1773	Cre12.g503850.t1.1	NA	PTHR11711:SF42 - ADP-RIBOSYLATION FACTOR 2 (1 of 1)									TRUE	FALSE		Cre10.g428734	Cre01.g045700
Cre03.g163000	0.53822	0.240894	1.28602	0.414571	-1.91572	-0.937888	0.549657	1755	Cre03.g163000.t1.2	POC5	Centriole proteome protein									FALSE	FALSE		Cre13.g582600	Cre17.g720500
Cre09.g387245	4.36456	2.14083	10.2149	4.3725	-1.91565	-0.937833	0.586858	1812	Cre09.g387245.t1.1	NA	PTHR13872:SF1 - DOLICHYL-DIPHOSPHOOLIGOSACCHARIDE--PROTEIN GLYCOSYLTRANSFERASE SUBUNIT STT3B (1 of 1)									FALSE	FALSE		Cre13.g583600	Cre03.g177750
Cre03.g198236	0.243032	0.175341	0.49614	0.224068	-1.91558	-0.937783	0.540601	1736	Cre03.g198236.t1.1	NA	NA									FALSE	FALSE		Cre09.g413566	Cre10.g451850
Cre16.g656700	1.47006	0.507782	3.36786	0.929689	-1.91548	-0.937704	0.584255	1806	Cre16.g656700.t1.2	NA	PTHR24115:SF464 - KINESIN-1-RELATED (1 of 1)									FALSE	FALSE		Cre07.g352800	Cre12.g528100
Cre10.g456400	1.81907	0.430621	4.21863	1.03261	-1.9152	-0.937495	0.589147	1818	Cre10.g456400.t1.1/Cre10.g456400.t2.1	DAT1	Dicarboxylate/amino acid cation sodium transporter									FALSE	TRUE		Cre09.g400150	Cre04.g227650
Cre12.g532800	0.533099	0.198022	1.26042	0.528713	-1.91471	-0.937124	0.560054	1770	Cre12.g532800.t1.2	NA	NA									FALSE	TRUE		Cre16.g658650	Cre01.g002787
Cre02.g076100	1.76398	0.597159	4.43763	2.26262	-1.9147	-0.93712	0.573435	1791	Cre02.g076100.t1.1	NA	PTHR18937 - STRUCTURAL MAINTENANCE OF CHROMOSOMES SMC FAMILY MEMBER (1 of 36)									TRUE	FALSE		Cre06.g306700	Cre16.g671950
Cre10.g426250	1.96644	1.20361	4.73187	2.36661	-1.91433	-0.93684	0.568365	1782	Cre10.g426250.t1.1	NA	K14800 - pre-rRNA-processing protein TSR2 (TSR2) (1 of 1)									FALSE	FALSE		Cre03.g174850	Cre02.g107000
Cre04.g217940	0.0382559	0.0379128	0.0925497	0.0153508	-1.91308	-0.935896	0.545599	1751	Cre04.g217940.t1.1	NA	PTHR24362 - SERINE/THREONINE-PROTEIN KINASE NEK (1 of 26)									FALSE	FALSE		Cre10.g430050	Cre06.g307900
Cre01.g011300	5.0868	2.06356	11.8288	3.88791	-1.91251	-0.935471	0.584941	1811	Cre01.g011300.t1.1	NA	K09645 - vitellogenic carboxypeptidase-like protein [EC:3.4.16.-] (CPVL) (1 of 3)									FALSE	TRUE		Cre01.g048350	Cre03.g205809
Cre09.g414416	0.202296	0.0349624	0.521374	0.198135	-1.91231	-0.935313	0.54388	1744	Cre09.g414416.t1.1	NA	PTHR10177 - CYCLINE (1 of 9)									FALSE	FALSE		Cre03.g150600	Cre01.g012600
Cre06.g274650	3.39329	0.698359	8.07361	2.8903	-1.91191	-0.935014	0.612244	1858	Cre06.g274650.t1.1	NA	PTHR15020:SF11 - UPF0659 PROTEIN YMR090W (1 of 3)									FALSE	FALSE		Cre03.g186150	Cre17.g741900
Cre16.g695200	0.206086	0.182578	0.40461	0.251753	-1.91135	-0.934591	0.542909	1745	Cre16.g695200.t1.1	NA	NA									FALSE	FALSE		Cre07.g339926	Cre02.g085000
Cre06.g278235	1.3422	0.563542	2.96191	0.815655	-1.91109	-0.934396	0.561881	1774	Cre06.g278235.t1.1	NA	NA									FALSE	FALSE		Cre16.g686050	Cre12.g485150
Cre16.g690506	1.61365	1.15167	3.55717	1.70196	-1.91095	-0.934289	0.556468	1768	Cre16.g690506.t1.1/Cre16.g690506.t2.1	NA	NA									FALSE	TRUE		Cre06.g262200	Cre16.g694208
Cre08.g373878	0.65616	0.316607	1.47588	0.289893	-1.91059	-0.93402	0.580329	1805	Cre08.g373878.t1.1	NA	2.7.11.1 - Non-specific serine/threonine protein kinase / Threonine-specific protein kinase (1 of 543)									FALSE	FALSE		Cre03.g158000	Cre13.g603050
Cre12.g557700	1.19777	0.294708	2.99394	1.34557	-1.90974	-0.933378	0.570366	1794	Cre12.g557700.t1.2	NA	K01069 - hydroxyacylglutathione hydrolase (E3.1.2.6, gloB) (1 of 1)									FALSE	TRUE		Cre06.g281350	Cre03.g203000
Cre02.g097100	15.9967	3.62235	37.6788	11.4183	-1.90951	-0.933204	0.668791	2019	Cre02.g097100.t1.2	NA	PF01697 - Glycosyltransferase family 92 (Glyco_transf_92) (1 of 8)									FALSE	FALSE		Cre06.g279150	Cre16.g687182
Cre07.g347700	0.669086	0.351761	1.477	0.32649	-1.90907	-0.932866	0.569312	1792	Cre07.g347700.t1.1	NA	PF10220 - Uncharacterized conserved protein (DUF2146) (DUF2146) (1 of 1)									FALSE	TRUE		Cre03.g187300	Cre17.g712200
Cre16.g684491	0.199069	0.0890985	0.456513	0.0170604	-1.9071	-0.931383	0.544474	1754	Cre16.g684491.t1.1	NA	PF04536 - TLP18.3, Psb32 and MOLO-1 founding proteins of phosphatase (TPM) (1 of 3)									FALSE	FALSE		Cre10.g442400	Cre02.g143500
Cre19.g750297	0.148989	0.117967	0.339202	0.104691	-1.9069	-0.93123	0.548057	1762	Cre19.g750297.t1.1	NA	2.7.11.1 - Non-specific serine/threonine protein kinase / Threonine-specific protein kinase (1 of 543)									FALSE	FALSE		Cre12.g557250	Cre06.g274550
Cre08.g365050	0.109319	0.0661394	0.357287	0.241038	-1.90603	-0.930572	0.547106	1760	Cre08.g365050.t1.2	NA	NA									FALSE	FALSE		Cre02.g118200	Cre17.g746697
Cre09.g411975	0.0300924	0.0277777	0.0618924	0.023987	-1.90602	-0.930562	0.544788	1756	Cre09.g411975.t1.1	NA	NA									FALSE	FALSE		Cre03.g143787	Cre02.g116400
Cre06.g259401	1.97191	0.337365	4.54927	0.469682	-1.90575	-0.930362	0.563525	1781	Cre06.g259401.t1.1	NA	PTHR10108//PTHR10108:SF813 - METHYLTRANSFERASE // SUBFAMILY NOT NAMED (1 of 2)									FALSE	TRUE		Cre16.g657979	Cre17.g731550
Cre12.g537000	41.757	21.8694	91.4343	32.5168	-1.90569	-0.930313	0.59814	1844	Cre12.g537000.t1.2	NA	PF02041 - Auxin binding protein (Auxin_BP) (1 of 1)									FALSE	TRUE		Cre07.g317201	Cre01.g021900
Cre08.g376000	2.71201	1.29284	6.15948	2.45958	-1.90557	-0.930223	0.559155	1777	Cre08.g376000.t1.1	NA	PTHR12906 - PROTEIN C20ORF24 RAB5-INTERACTING PROTEIN (1 of 1)									FALSE	FALSE		Cre04.g217220	Cre03.g200950
Cre09.g387578	0.433737	0.255209	0.925989	0.153448	-1.90506	-0.929836	0.54519	1758	Cre09.g387578.t1.1	NA	PF10497 - Zinc-finger domain of monoamine-oxidase A repressor R1 (zf-4CXXC_R1) (1 of 3)									FALSE	FALSE		Cre15.g636400	Cre08.g362100
Cre07.g326300	1.48542	0.542819	3.80378	2.21875	-1.90491	-0.929726	0.585984	1821	Cre07.g326300.t1.2	NA	PTHR12205 - CENTROMERE/KINETOCHORE PROTEIN ZW10 (1 of 1)									FALSE	FALSE		Cre11.g475350	Cre12.g557650
Cre15.g641650	1.39054	0.385224	3.35478	1.34211	-1.90469	-0.929558	0.624069	1917	Cre15.g641650.t1.1	NA	PTHR10887:SF331 - HELICASE MOV10L1-RELATED (1 of 3)									FALSE	TRUE		Cre12.g546350	Cre06.g309600
Cre12.g487700	0.613149	0.270896	1.43719	0.473835	-1.90455	-0.929449	0.551286	1769	Cre12.g487700.t1.2	NA	2.7.11.1 - Non-specific serine/threonine protein kinase / Threonine-specific protein kinase (1 of 543)									FALSE	TRUE		Cre07.g312850	Cre02.g112800
Cre09.g399552	17.8678	7.15695	39.498	5.58397	-1.90415	-0.929151	0.625905	1924	Cre09.g399552.t1.1	LCR1	Low-CO2 response regulator, Myb-like transcription factor									FALSE	TRUE		Cre17.g729450	Cre03.g205350
Cre02.g093600	37.1241	8.54853	93.7145	58.5192	-1.90412	-0.929125	0.620594	1905	Cre02.g093600.t1.2	NA	PF03061 - Thioesterase superfamily (4HBT) (1 of 5)									TRUE	FALSE		Cre12.g499500	Cre01.g011800
Cre03.g199250	0.210629	0.166489	0.377819	0.207742	-1.90409	-0.929105	0.546879	1763	Cre03.g199250.t1.1/Cre03.g199250.t2.1	CYG51	Adenylate/guanylate cyclase									FALSE	FALSE		Cre06.g258100	Cre17.g702250
Cre12.g508850	6.27044	2.54086	13.9097	3.83931	-1.90393	-0.928981	0.614787	1886	Cre12.g508850.t1.1	NA	PTHR11260//PTHR11260:SF225 - GLUTATHIONE S-TRANSFERASE, GST, SUPERFAMILY, GST DOMAIN CONTAINING // SUBFAMILY NOT NAMED (1 of 1)									FALSE	FALSE		Cre01.g020264	Cre11.g467586
Cre03.g172550	3.12579	1.81663	7.53391	4.12737	-1.90366	-0.928779	0.565729	1790	Cre03.g172550.t1.2	PRM1	Protein-/Histone-arginine N-methyltransferase									FALSE	FALSE		Cre17.g730700	Cre10.g453700
Cre11.g467593	4.86256	3.14181	9.12024	4.392	-1.90334	-0.928532	0.568676	1801	Cre11.g467593.t1.1	NA	KOG1030 - Predicted Ca2+-dependent phospholipid-binding protein (1 of 5)									FALSE	FALSE		Cre15.g643550	Cre01.g049300
Cre14.g629000	2.93393	1.24535	7.2336	3.65291	-1.90314	-0.928382	0.561969	1786	Cre14.g629000.t1.2	CGLD19	Predicted protein									FALSE	FALSE		Cre06.g253051	Cre02.g103100
Cre03.g208550	0.236581	0.271177	0.386476	0.108047	-1.90285	-0.928162	0.565103	1789	Cre03.g208550.t1.2	NA	PTHR13078:SF22 - MAOC-LIKE DEHYDRATASE DOMAIN-CONTAINING PROTEIN (1 of 14)									TRUE	FALSE		Cre12.g551852	Cre04.g219100
Cre01.g022400	0.733894	0.564873	1.21964	0.0202422	-1.90226	-0.927717	0.556291	1780	Cre01.g022400.t1.1	NA	NA									TRUE	FALSE		Cre10.g434950	Cre10.g440550
Cre13.g572200	2.75449	1.66693	5.82084	2.00296	-1.90165	-0.927251	0.595493	1847	Cre13.g572200.t1.2	NA	K03834 - tyrosine-specific transport protein (tyrP) (1 of 1)									TRUE	FALSE		Cre12.g552750	Cre03.g149550
Cre12.g516000	3.16094	1.16697	7.24574	1.91577	-1.90123	-0.926932	0.573003	1807	Cre12.g516000.t1.1	NA	PF07978 - NIPSNAP (NIPSNAP) (1 of 2)									FALSE	TRUE		Cre01.g038550	Cre14.g633150
Cre07.g339000	0.400578	0.158522	0.953167	0.439456	-1.89896	-0.92521	0.551183	1775	Cre07.g339000.t1.1	NA	PTHR33791:SF1 - CHAPERONIN-LIKE RBCX PROTEIN (1 of 2)									FALSE	TRUE		Cre15.g637501	Cre06.g289300
Cre12.g516300	0.154257	0.0869033	0.316934	0.0470685	-1.89857	-0.924915	0.566633	1802	Cre12.g516300.t1.1	NA	PF13229 - Right handed beta helix region (Beta_helix) (1 of 13)									FALSE	FALSE		Cre12.g496150	Cre12.g498750
Cre16.g680450	1.93592	0.437998	4.84572	2.40025	-1.89756	-0.924143	0.614447	1893	Cre16.g680450.t1.1	NA	NA									FALSE	FALSE		Cre10.g428200	Cre12.g487650
Cre02.g077150	3.46114	1.30243	7.89741	1.97849	-1.89751	-0.92411	0.58529	1830	Cre02.g077150.t1.1	CPLD14	Predicted protein									FALSE	FALSE		Cre03.g187450	Cre09.g390250
Cre14.g619854	1.45644	0.174378	3.29034	0.689532	-1.89698	-0.923708	0.595161	1849	Cre14.g619854.t1.2	NA	2.4.2.41 - Xylogalacturonan beta-1,3-xylosyltransferase / Xylogalacturonan xylosyltransferase (1 of 33)									FALSE	TRUE		Cre01.g061442	Cre12.g516000
Cre13.g575150	4.44173	1.27402	10.2441	3.26582	-1.89647	-0.923313	0.611807	1881	Cre13.g575150.t1.1	NA	2.7.11.1 - Non-specific serine/threonine protein kinase / Threonine-specific protein kinase (1 of 543)									FALSE	TRUE		Cre14.g617850	Cre15.g636600
Cre01.g012000	2.09274	0.365467	4.86435	1.35494	-1.89632	-0.9232	0.656132	2006	Cre01.g012000.t1.1	NA	NA									FALSE	TRUE		Cre16.g673953	Cre09.g386900
Cre12.g496650	0.942794	0.650114	2.67988	2.21664	-1.89616	-0.923077	0.561089	1795	Cre12.g496650.t1.2	NA	PTHR12863 - FATTY ACID HYDROXYLASE (1 of 1)									FALSE	FALSE		Cre01.g054100	Cre09.g396698
Cre05.g247400	5.7102	1.37315	13.817	5.30901	-1.8956	-0.922654	0.621392	1920	Cre05.g247400.t1.2	RDP4	Putative rhodanese domain phosphatase									FALSE	TRUE		Cre02.g115567	Cre07.g354400
Cre09.g404350	0.847692	0.329778	2.05017	0.887228	-1.89539	-0.922497	0.596798	1855	Cre09.g404350.t1.2	NA	PTHR12596:SF1 - EXPORTIN-4 (1 of 1)									TRUE	FALSE		Cre10.g420100	Cre12.g523250
Cre03.g150050	1.98082	0.783121	4.45488	0.870206	-1.89396	-0.921406	0.623437	1928	Cre03.g150050.t1.1	NA	3.1.3.4 - Phosphatidate phosphatase / Phosphatidic acid phospphatase (1 of 5)									FALSE	FALSE		Cre09.g409000	Cre10.g421550
Cre13.g564350	1.02285	0.221958	2.41253	0.783091	-1.89395	-0.921401	0.636037	1953	Cre13.g564350.t1.2/Cre13.g564350.t2.1	NA	K04728 - ataxia telangiectasia mutated family protein (ATM, TEL1) (1 of 1)									FALSE	TRUE		Cre16.g682400	Cre05.g241500
Cre02.g102276	0.933221	0.821852	1.41	0.891846	-1.89339	-0.92097	0.552528	1783	Cre02.g102276.t1.1/Cre02.g102276.t2.1	NA	NA									FALSE	FALSE		Cre07.g315326	Cre11.g467678
Cre09.g393551	1.11285	0.28324	2.66215	1.16157	-1.89335	-0.920937	0.573911	1814	Cre09.g393551.t1.1	NA	KOG0155 - Transcription factor CA150 (1 of 1)									FALSE	TRUE		Cre06.g304450	Cre09.g396850
Cre10.g455750	1.75969	0.482239	4.199	1.7122	-1.89327	-0.920881	0.616294	1912	Cre10.g455750.t1.1	NA	PTHR10799:SF271 - ATP-DEPENDENT HELICASE ULS1 (1 of 1)									FALSE	TRUE		Cre08.g381800	Cre06.g262750
Cre17.g706850	5.52511	1.99735	13.579	7.05524	-1.89222	-0.920079	0.606355	1878	Cre17.g706850.t1.1	NA	PTHR13377 - PLACENTAL PROTEIN 6 (1 of 1)									FALSE	FALSE		Cre07.g337150	Cre02.g141686
Cre04.g233102	0.650724	0.0573522	1.61421	0.728722	-1.89218	-0.920052	0.576284	1819	Cre04.g233102.t1.1	NA	2.7.11.1 - Non-specific serine/threonine protein kinase / Threonine-specific protein kinase (1 of 543)									FALSE	FALSE		Cre12.g514550	Cre06.g301550
Cre09.g410900	0.894872	0.627475	2.18787	1.51838	-1.89172	-0.919696	0.558312	1797	Cre09.g410900.t1.2	NA	PF16974 - High-affinity nitrate transporter accessory (NAR2) (1 of 1)									FALSE	FALSE		Cre03.g157475	Cre03.g195250
Cre09.g417013	0.371323	0.226392	0.84195	0.183672	-1.89163	-0.919626	0.55588	1793	Cre09.g417013.t1.1	NA	NA									FALSE	FALSE		Cre12.g531550	Cre12.g514200
Cre09.g393400	2.87288	0.787749	6.84231	2.52914	-1.89155	-0.91957	0.640184	1971	Cre09.g393400.t1.2	VTE4	Tocopherol O-methyltransferase/gamma-tocopherol methyltransferase									FALSE	TRUE		Cre09.g387300	Cre09.g394769
Cre04.g214000	0.629574	0.286509	1.47975	0.716199	-1.89057	-0.91882	0.589638	1850	Cre04.g214000.t1.1	NA	PTHR19331//PTHR19331:SF296 - LYSYL OXIDASE-RELATED // SUBFAMILY NOT NAMED (1 of 1)									FALSE	TRUE		Cre06.g269250	Cre11.g482150
Cre10.g425100	1.14323	0.398995	2.6444	0.813394	-1.89053	-0.918788	0.638987	1969	Cre10.g425100.t1.2	NA	PTHR24185:SF1 - CALCIUM-INDEPENDENT PHOSPHOLIPASE A2-GAMMA (1 of 1)									TRUE	FALSE		Cre12.g548300	Cre16.g679200
Cre07.g315300	1.11139	0.455769	2.77129	1.60297	-1.89039	-0.918687	0.571804	1815	Cre07.g315300.t1.2	CSG4	Predicted protein of CSG family									FALSE	FALSE		Cre16.g656300	Cre01.g008500
Cre07.g322000	2.95521	0.329439	6.82399	2.63447	-1.8891	-0.9177	0.607599	1887	Cre07.g322000.t1.2	CSD2	Cysteine desulfurase									FALSE	FALSE		Cre14.g624550	Cre03.g199150
Cre02.g080150	2.85469	0.17876	7.9758	5.78203	-1.88871	-0.9174	0.613919	1908	Cre02.g080150.t1.1	NA	NA									FALSE	FALSE		Cre09.g400100	Cre06.g255500
Cre01.g022450	3.68259	0.567411	8.35152	1.81058	-1.88848	-0.917222	0.590911	1853	Cre01.g022450.t1.1	NA	PF07707 - BTB And C-terminal Kelch (BACK) (1 of 15)									FALSE	FALSE		Cre09.g397549	Cre06.g275950
Cre03.g191900	3.94515	1.95528	8.70035	3.05509	-1.88813	-0.916961	0.638945	1974	Cre03.g191900.t1.2	NA	K11840 - ubiquitin carboxyl-terminal hydrolase 9/24 [EC:3.4.19.12] (USP9_24) (1 of 1)									FALSE	TRUE		Cre07.g329850	Cre03.g201900
Cre07.g350976	37.5346	25.838	109.783	107.864	-1.88805	-0.916895	0.56652	1810	Cre07.g350976.t1.1	NA	NA									FALSE	FALSE		Cre12.g543303	Cre09.g413100
Cre06.g273500	2.6987	1.36129	6.55157	3.54861	-1.88803	-0.916883	0.61223	1902	Cre06.g273500.t1.2/Cre06.g273500.t2.1	NA	K14641 - apyrase (APY1_2) (1 of 1)									TRUE	FALSE		Cre03.g199652	Cre07.g346750
Cre16.g660750	1.98083	0.348774	4.59657	1.39964	-1.88646	-0.915684	0.56963	1817	Cre16.g660750.t1.1	NA	K19352 - coiled-coil and C2 domain-containing protein 2A (CC2D2A) (1 of 1)									TRUE	FALSE		Cre10.g466700	Cre13.g579598
Cre11.g480700	3.78304	1.67404	8.63872	3.08101	-1.88594	-0.915282	0.623146	1933	Cre11.g480700.t1.1/Cre11.g480700.t2.1	NA	PTHR10157 - DOPAMINE BETA HYDROXYLASE RELATED (1 of 33)									FALSE	TRUE		Cre05.g232800	Cre16.g690506
Cre10.g440650	1.01164	0.360874	2.63965	1.58314	-1.88589	-0.915248	0.554109	1799	Cre10.g440650.t1.1	NA	PTHR12176:SF18 - METHYLTRANSFERASE-LIKE PROTEIN 13 (1 of 1)									FALSE	FALSE		Cre02.g093950	Cre16.g664200
Cre07.g339450	1.21699	0.707284	2.6014	0.821284	-1.88493	-0.91451	0.571746	1820	Cre07.g339450.t1.1	NA	NA									FALSE	FALSE		Cre10.g439550	Cre06.g260050
Cre03.g207700	6.1245	1.99754	14.2885	5.03215	-1.88294	-0.912984	0.637261	1977	Cre03.g207700.t1.1	PPS1	Farnesyl pyrophosphate synthase									FALSE	FALSE		Cre11.g480100	Cre04.g225301
Cre16.g687050	0.760762	0.529176	1.76157	1.06674	-1.88273	-0.912826	0.573676	1826	Cre16.g687050.t1.1	NA	NA									FALSE	FALSE		Cre06.g280900	Cre11.g474900
Cre05.g247450	2.93624	1.34833	6.89054	3.17095	-1.88038	-0.911022	0.623501	1941	Cre05.g247450.t1.2	CGL56	Putative rhodanese-like protein									FALSE	TRUE		Cre09.g388801	Cre07.g347050
Cre17.g737050	5.09823	0.764335	12.8984	6.70051	-1.88018	-0.910871	0.575094	1829	Cre17.g737050.t1.2	NA	PTHR22957//PTHR22957:SF287 - TBC1 DOMAIN FAMILY MEMBER GTPASE-ACTIVATING PROTEIN // SUBFAMILY NOT NAMED (1 of 1)									TRUE	FALSE		Cre17.g733400	Cre09.g397438
Cre13.g575550	0.446135	0.133892	1.41008	1.23744	-1.87956	-0.910393	0.582125	1840	Cre13.g575550.t1.2	NA	NA									FALSE	FALSE		Cre01.g051400	Cre09.g415250
Cre08.g383600	0.645101	0.214912	1.41534	0.391971	-1.87946	-0.910315	0.603739	1892	Cre08.g383600.t1.1	SRR21	Scavenger receptor cysteine rich (SRCR) protein									TRUE	FALSE		Cre07.g318000	Cre02.g091700
Cre06.g278089	0.354104	0.112566	0.973382	0.631216	-1.87937	-0.91025	0.574245	1832	Cre06.g278089.t1.1	NA	PF00350 - Dynamin family (Dynamin_N) (1 of 13)									FALSE	TRUE		Cre11.g475400	Cre11.g467596
Cre06.g283600	1.45404	0.612622	3.44843	1.63283	-1.8787	-0.909737	0.576225	1834	Cre06.g283600.t1.2	NA	NA									FALSE	TRUE		Cre06.g280100	Cre16.g651900
Cre08.g358576	2.03751	0.524386	4.92755	2.04939	-1.87869	-0.90973	0.588162	1857	Cre08.g358576.t1.1	NA	PTHR24198 - ANKYRIN REPEAT AND PROTEIN KINASE DOMAIN-CONTAINING PROTEIN (1 of 34)									TRUE	FALSE		Cre09.g396950	Cre06.g278160
Cre16.g695500	5.1981	1.42841	11.821	3.01363	-1.87847	-0.909554	0.626468	1951	Cre16.g695500.t1.1/Cre16.g695500.t2.1	NA	PTHR23516:SF1 - MOLYBDATE-ANION TRANSPORTER (1 of 2)									FALSE	TRUE		Cre09.g413050	Cre04.g213761
Cre07.g344600	2.86705	1.01719	6.51515	1.99675	-1.87814	-0.909302	0.615889	1927	Cre07.g344600.t1.2	PGD1	D-3-phosphoglycerate dehydrogenase									FALSE	TRUE		Cre03.g199600	Cre05.g236039
Cre01.g025726	0.0243799	0.0422272	0.250903	0.434576	-1.87769	-0.908962	0.56865	1824	Cre01.g025726.t1.1	NA	NA									FALSE	FALSE		Cre04.g224750	Cre06.g292500
Cre07.g325728	4.08087	2.73204	8.06928	1.88339	-1.87718	-0.908566	0.590978	1868	Cre07.g325728.t1.1	NA	PF12681 - Glyoxalase-like domain (Glyoxalase_2) (1 of 5)									FALSE	TRUE		Cre03.g199950	Cre09.g391208
Cre10.g429800	0.206768	0.144366	0.452005	0.127383	-1.87687	-0.908326	0.571925	1833	Cre10.g429800.t1.2	COQ8	Ubiquinone biosynthesis protein									FALSE	FALSE		Cre01.g001678	Cre17.g715250
Cre12.g507600	0.795172	0.166895	1.98582	0.979248	-1.87672	-0.908216	0.601164	1891	Cre12.g507600.t1.2	NA	NA									FALSE	FALSE		Cre12.g517400	Cre08.g383101
Cre01.g030900	0.0210307	0.0364263	0.135818	0.235243	-1.87648	-0.908032	0.570493	1831	Cre01.g030900.t1.1	NA	6.2.1.26 - o-succinylbenzoate--CoA ligase / OSB-CoA synthetase (1 of 1)									FALSE	FALSE		Cre12.g497900	Cre03.g163850
Cre03.g150700	4.07741	2.01954	9.76959	5.28493	-1.87504	-0.906922	0.620011	1938	Cre03.g150700.t1.1	NA	KOG1710//KOG4214 - MYND Zn-finger and ankyrin repeat protein // Myotrophin and similar proteins (1 of 1)									FALSE	FALSE		Cre16.g659250	Cre01.g027700
Cre09.g395450	3.64585	0.763209	9.10181	8.48287	-1.87477	-0.906717	0.587492	1862	Cre09.g395450.t1.2/Cre09.g395450.t2.1	NA	PF01344 - Kelch motif (Kelch_1) (1 of 9)									FALSE	FALSE		Cre09.g406050	Cre03.g159150
Cre06.g263950	1.71425	0.563742	4.97122	4.02496	-1.87428	-0.90634	0.57347	1837	Cre06.g263950.t1.1	NA	3.6.3.9 - Sodium/potassium-exchanging ATPase / Sodium/potassium-transporting ATPase (1 of 1)									FALSE	FALSE		Cre12.g522800	Cre08.g358534
Cre01.g037550	0.384662	0.155673	0.873149	0.174282	-1.87377	-0.905946	0.61387	1925	Cre01.g037550.t1.1	NA	3.2.1.82 - Exo-poly-alpha-galacturonosidase / Exopolygalacturanosidase (1 of 1)									FALSE	TRUE		Cre03.g166600	Cre16.g670950
Cre05.g241634	0.245514	0.00407383	0.558765	0.087387	-1.87365	-0.905853	0.611642	1918	Cre05.g241634.t1.1	HAV2	Histone H2A variant									FALSE	TRUE		Cre06.g311900	Cre06.g296550
Cre08.g376900	1.24384	0.136629	2.84279	0.124337	-1.87357	-0.905793	0.594634	1879	Cre08.g376900.t1.1/Cre08.g376900.t2.1	NA	PTHR31849:SF1 - CYSTEINE-RICH DPF MOTIF DOMAIN-CONTAINING PROTEIN 1 (1 of 1)									FALSE	FALSE		Cre10.g464550	Cre17.g732300
Cre12.g519050	10.3877	5.90359	22.8964	7.44637	-1.87273	-0.905139	0.636421	1989	Cre12.g519050.t1.1/Cre12.g519050.t2.1	NA	NA									FALSE	FALSE		Cre10.g444100	Cre13.g573450
Cre02.g081700	38.0915	10.112	84.0888	13.7516	-1.87149	-0.904186	0.683113	2114	Cre02.g081700.t1.1	NA	PF12499 - Pherophorin (DUF3707) (1 of 70)									FALSE	FALSE		Cre09.g396450	Cre12.g533900
Cre14.g626634	1.28222	0.353179	3.01671	1.15976	-1.87001	-0.903046	0.653993	2031	Cre14.g626634.t1.1	NA	K15450 - tRNA wybutosine-synthesizing protein 3 [EC:2.1.1.282] (TYW3) (1 of 1)									FALSE	TRUE		Cre12.g517800	Cre09.g399289
Cre17.g736350	0.810923	0.176898	1.82786	0.206932	-1.86951	-0.902657	0.644854	2016	Cre17.g736350.t1.1	NA	NA									FALSE	TRUE		Cre03.g145667	Cre02.g104250
Cre05.g248400	1.00279	0.365553	2.24596	0.368339	-1.8693	-0.902498	0.565235	1825	Cre05.g248400.t1.2	CAH4	Mitochondrial carbonic anhydrase, beta type									FALSE	TRUE		Cre10.g452650	Cre05.g241637
Cre13.g561900	0.435668	0.217376	1.05746	0.301468	-1.86907	-0.90232	0.580852	1852	Cre13.g561900.t1.1	NA	K03470 - ribonuclease HII (rnhB) (1 of 1)									FALSE	TRUE		Cre03.g179800	Cre16.g663000
Cre03.g171950	1.71182	1.0733	4.23757	2.77136	-1.86905	-0.902307	0.589612	1876	Cre03.g171950.t1.1	NA	Phosphoenolpyruvate carboxylase									FALSE	TRUE		Cre17.g696250	Cre12.g529250
Cre06.g271700	3.97578	0.746165	9.42295	3.64506	-1.86904	-0.902297	0.637974	2000	Cre06.g271700.t1.1	NA	3.4.17.4 - Gly-Xaa carboxypeptidase / Glycine carboxypeptidase (1 of 2)									FALSE	TRUE		Cre13.g579901	Cre11.g475300
Cre09.g399326	0.902798	0.569258	1.80767	0.577153	-1.86891	-0.9022	0.587485	1871	Cre09.g399326.t1.1	NA	K15110 - solute carrier family 25 (mitochondrial 2-oxodicarboxylate transporter), member 21 (SLC25A21, ODC) (1 of 2)									FALSE	TRUE		Cre17.g696300	Cre01.g019650
Cre02.g090650	0.898806	0.62365	2.03961	1.07676	-1.86879	-0.902108	0.608424	1919	Cre02.g090650.t1.1	NA	Endoplasmic reticulum Qb-SNARE protein, Sec20-family (Qb.I)									TRUE	FALSE		Cre17.g711100	Cre01.g040300
Cre06.g291950	0.116784	0.0431998	0.259301	0.0562946	-1.86869	-0.90203	0.58714	1870	Cre06.g291950.t1.2	NA	KOG2662 - Magnesium transporters: CorA family (1 of 5)									TRUE	FALSE		Cre08.g367300	Cre05.g236802
Cre03.g151700	1.93466	1.04458	4.87193	3.13308	-1.86829	-0.90172	0.615229	1934	Cre03.g151700.t1.2/Cre03.g151700.t2.1	CGL26	Predicted protein									TRUE	FALSE		Cre01.g012450	Cre04.g227700
Cre06.g262300	4.79715	1.1934	11.5391	5.00458	-1.8672	-0.900876	0.615597	1937	Cre06.g262300.t1.2	CYN51	Peptidyl-prolyl cis-trans isomerase, cyclophilin-type									FALSE	FALSE		Cre06.g281286	Cre10.g434400
Cre01.g016600	0.0293074	0.0507618	0.19181	0.177272	-1.86589	-0.899866	0.562498	1828	Cre01.g016600.t1.2	PSBS1	Chloroplast Photosystem II-associated 22 kDa protein									FALSE	FALSE		Cre02.g143307	Cre16.g669500
Cre08.g367800	2.15449	1.18444	4.58957	0.633961	-1.86562	-0.899654	0.630309	1982	Cre08.g367800.t1.2	NA	3.6.1.13//3.6.1.22 - ADP-ribose diphosphatase / ADPR-PPase // NAD(+) diphosphatase / NADP pyrophosphatase (1 of 1)									FALSE	FALSE		Cre03.g152701	Cre07.g346250
Cre06.g276300	1.07767	0.485111	2.37325	0.394454	-1.8648	-0.899019	0.578983	1854	Cre06.g276300.t1.1/Cre06.g276300.t2.1	NA	NA									TRUE	FALSE		Cre03.g211185	Cre17.g742400
Cre06.g281250	1.84989	1.14163	3.88326	1.40728	-1.86451	-0.898799	0.586845	1873	Cre06.g281250.t1.2	CFA1	Cyclopropane fatty acid synthase									TRUE	FALSE		Cre11.g467744	Cre13.g567200
Cre04.g230928	0.457612	0.157548	1.12929	0.645811	-1.86388	-0.898312	0.622677	1961	Cre04.g230928.t1.1	NA	K10758 - thiol oxidase (QSOX) (1 of 1)									FALSE	FALSE		Cre03.g172150	Cre16.g674650
Cre02.g090100	1.90915	1.44904	3.5758	1.01386	-1.86346	-0.897984	0.601198	1916	Cre02.g090100.t1.2	NA	K18932 - palmitoyltransferase (ZDHHC) (1 of 7)									FALSE	FALSE		Cre12.g551801	Cre12.g524250
Cre12.g534400	4.72634	1.1754	11.7802	5.26375	-1.86334	-0.89789	0.630075	1985	Cre12.g534400.t1.1	NA	NA									FALSE	TRUE		Cre07.g340600	Cre14.g608300
Cre08.g375301	0.368109	0.140543	0.872307	0.303503	-1.86068	-0.89583	0.584357	1867	Cre08.g375301.t1.1	NA	NA									FALSE	FALSE		Cre11.g480000	Cre06.g278178
Cre09.g400851	0.0635716	0.050335	0.146947	0.082324	-1.85863	-0.894241	0.56727	1841	Cre09.g400851.t1.1	NA	NA									FALSE	FALSE		Cre04.g215850	Cre06.g296450
Cre03.g201050	0.537605	0.462841	1.06043	0.223268	-1.85851	-0.894145	0.58556	1875	Cre03.g201050.t1.2	ZNJ2	DnaJ-like Zinc-finger protein									FALSE	FALSE		Cre08.g358538	Cre07.g329050
Cre02.g078400	0.336394	0.139225	0.89462	0.661953	-1.85785	-0.893638	0.582968	1865	Cre02.g078400.t1.1	NA	NA									FALSE	FALSE		Cre01.g022200	Cre10.g442600
Cre16.g656300	6.93153	2.80083	15.0668	2.22256	-1.85775	-0.893556	0.697391	2173	Cre16.g656300.t1.1	DPR1	Dihydrodipicolinate reductase									TRUE	FALSE		Cre16.g673505	Cre13.g565450
Cre06.g275300	3.78841	1.73566	9.37599	5.46001	-1.85741	-0.893289	0.59836	1915	Cre06.g275300.t1.2	NA	PTHR13049 - DUF814-RELATED (1 of 1)									FALSE	FALSE		Cre02.g086150	Cre02.g145250
Cre05.g240550	5.33799	1.8054	12.3441	4.75886	-1.85728	-0.893193	0.688561	2160	Cre05.g240550.t1.2	NA	PTHR12941 - ER MEMBRANE PROTEIN COMPLEX (1 of 1)									FALSE	FALSE		Cre03.g178600	Cre17.g728800
Cre03.g166550	1.11182	0.305769	2.57976	0.574088	-1.85714	-0.893081	0.594249	1904	Cre03.g166550.t1.1	NA	PTHR10730 - PROCOLLAGEN-LYSINE,2-OXOGLUTARATE 5-DIOXYGENASE/GLYCOSYLTRANSFERASE 25 FAMILY MEMBER (1 of 1)									FALSE	FALSE		Cre17.g711150	Cre13.g575150
Cre06.g277250	0.0480876	0.0832901	0.0850429	0.0765579	-1.85707	-0.89303	0.566223	1842	Cre06.g277250.t1.2	NA	NA									FALSE	FALSE		Cre03.g193300	Cre01.g042850
Cre16.g669452	0.0251902	0.0436308	0.173492	0.242635	-1.85699	-0.892968	0.567695	1846	Cre16.g669452.t1.1	NA	NA									FALSE	TRUE		Cre03.g145707	Cre06.g260500
Cre06.g275400	0.223434	0.0656124	0.644625	0.41197	-1.85688	-0.892877	0.573677	1856	Cre06.g275400.t1.1	NA	PTHR10331 - T COMPLEX PROTEIN 10 (1 of 1)									FALSE	FALSE		Cre17.g697800	Cre10.g454600
Cre05.g236600	1.01438	0.0807171	2.2971	0.572045	-1.8568	-0.89282	0.650161	2050	Cre05.g236600.t1.1	NA	NA									FALSE	TRUE		Cre08.g358536	Cre01.g008200
Cre16.g678700	0.0644034	0.0759888	0.103475	0.033763	-1.85646	-0.892558	0.567364	1848	Cre16.g678700.t1.2	NA	NA									FALSE	FALSE		Cre01.g040200	Cre07.g346000
Cre12.g497850	7.9043	2.2572	17.7091	4.85047	-1.85594	-0.892152	0.648525	2048	Cre12.g497850.t1.2	NA	NA									FALSE	TRUE		Cre02.g095099	Cre17.g741200
Cre13.g584950	3.01647	1.03878	7.11152	3.02924	-1.85592	-0.892132	0.66452	2073	Cre13.g584950.t1.1	NA	NA									FALSE	FALSE		Cre12.g558150	Cre04.g223700
Cre14.g609030	2.2347	0.317443	5.18091	1.75911	-1.85582	-0.892054	0.62283	1980	Cre14.g609030.t1.1	NA	PTHR23088:SF27 - NITRILASE HOMOLOG 1 (1 of 1)									FALSE	FALSE		Cre09.g388763	Cre09.g387950
Cre12.g510252	1.78765	0.598252	4.22201	1.89356	-1.85531	-0.891657	0.585783	1888	Cre12.g510252.t1.1	NA	NA									FALSE	FALSE		Cre07.g345800	Cre05.g238280
Cre14.g631575	0.246171	0.171748	0.470718	0.125661	-1.85521	-0.891585	0.580902	1872	Cre14.g631575.t1.2	NA	NA									FALSE	FALSE		Cre17.g734500	Cre10.g466800
Cre12.g492350	4.35924	1.86169	9.9817	4.63017	-1.85507	-0.891476	0.633988	2017	Cre12.g492350.t1.2	NA	PTHR21530 - PHEROMONE SHUTDOWN PROTEIN (1 of 2)									FALSE	FALSE		Cre01.g009676	Cre03.g185950
Cre12.g559200	0.243523	0.147343	0.475126	0.0969704	-1.85458	-0.891095	0.603636	1931	Cre12.g559200.t1.1	NA	NA									FALSE	FALSE		Cre12.g509800	Cre10.g447900
Cre12.g551353	1.29569	0.876404	4.76084	5.79484	-1.8537	-0.890409	0.5763	1869	Cre12.g551353.t1.1	NA	NA									FALSE	FALSE		Cre08.g369300	Cre09.g391650
Cre10.g455400	0.519582	0.1835	1.13916	0.121619	-1.85205	-0.889124	0.584844	1889	Cre10.g455400.t1.2	NA	PTHR18895:SF73 - TRNA1(VAL) (ADENINE(37)-N6)-METHYLTRANSFERASE (1 of 1)									FALSE	FALSE		Cre07.g349600	Cre10.g451150
Cre13.g588850	3.00046	1.16978	7.28676	4.09362	-1.85182	-0.888946	0.624812	1994	Cre13.g588850.t1.2	NA	PF10250 - GDP-fucose protein O-fucosyltransferase (O-FucT) (1 of 3)									FALSE	TRUE		Cre04.g217921	Cre11.g467728
Cre03.g191550	0.490997	0.269154	0.97578	0.302797	-1.85178	-0.888914	0.605792	1936	Cre03.g191550.t1.2	NA	NA									FALSE	FALSE		Cre12.g518200	Cre02.g145628
Cre03.g175584	0.515331	0.392242	1.03668	0.132171	-1.85144	-0.888649	0.572413	1863	Cre03.g175584.t1.2	NA	NA									FALSE	FALSE		Cre09.g404450	Cre06.g295550
Cre06.g301201	0.175613	0.122613	0.417561	0.192296	-1.8512	-0.888457	0.578398	1874	Cre06.g301201.t1.1	NA	PF03372 - Endonuclease/Exonuclease/phosphatase family (Exo_endo_phos) (1 of 51)									FALSE	FALSE		Cre15.g641674	Cre16.g668600
Cre11.g478128	4.97165	2.47736	11.0222	3.60448	-1.85099	-0.888293	0.678976	2139	Cre11.g478128.t1.1	NA	K06158 - ATP-binding cassette, subfamily F, member 3 (ABCF3) (1 of 1)									FALSE	FALSE		Cre02.g117175	Cre03.g144064
Cre13.g586250	1.79249	0.508105	4.48881	2.44278	-1.85085	-0.888191	0.614096	1954	Cre13.g586250.t1.2	NA	2.7.1.24 - Dephospho-CoA kinase / Dephosphocoenzyme A kinase (1 of 2)									FALSE	FALSE		Cre16.g670973	Cre17.g719450
Cre15.g635750	1.15675	0.683437	2.33022	0.782501	-1.85062	-0.888006	0.61802	1972	Cre15.g635750.t1.1/Cre15.g635750.t2.1	NA	PF04564 - U-box domain (U-box) (1 of 30)									FALSE	TRUE		Cre09.g414050	Cre01.g043800
Cre03.g149851	0.426043	0.0738639	0.98077	0.272415	-1.85031	-0.887767	0.586073	1900	Cre03.g149851.t1.1	NA	NA									FALSE	TRUE		Cre06.g262150	Cre11.g467630
Cre06.g291550	3.28085	1.21932	7.42254	2.47945	-1.85006	-0.887574	0.668364	2106	Cre06.g291550.t1.2	NA	NA									FALSE	FALSE		Cre07.g315900	Cre02.g108650
Cre07.g325742	0.825149	0.489049	1.86441	0.30937	-1.8498	-0.88737	0.569023	1860	Cre07.g325742.t1.1	NA	NA									FALSE	FALSE		Cre09.g401552	Cre11.g467727
Cre16.g663100	4.12006	1.27332	9.86548	4.48184	-1.84967	-0.887265	0.664884	2088	Cre16.g663100.t1.1	NA	2.7.8.15 - UDP-N-acetylglucosamine--dolichyl-phosphate N-acetylglucosaminephosphotransferase / N-acetylglucosamine-1-phosphate transferase (1 of 1)									FALSE	FALSE		Cre06.g278229	Cre06.g285200
Cre06.g278206	4.68251	2.68587	9.47776	0.885137	-1.84877	-0.886562	0.625717	2007	Cre06.g278206.t1.1	NA	NA									FALSE	FALSE		Cre13.g576000	Cre13.g574300
Cre05.g234666	2.42785	0.816059	6.13417	3.24966	-1.84869	-0.8865	0.642466	2045	Cre05.g234666.t1.1/Cre05.g234666.t2.1	NA	PTHR11258 - 2-5 OLIGOADENYLATE SYNTHETASE (1 of 10)									FALSE	FALSE		Cre16.g664400	Cre06.g260800
Cre02.g145750	0.140982	0.0711486	0.412454	0.342718	-1.84662	-0.884884	0.57691	1880	Cre02.g145750.t1.1	AOT2	Amino acid transporter									FALSE	FALSE		Cre10.g459300	Cre07.g317100
Cre06.g286150	0.768935	0.455733	1.55752	0.0991432	-1.84658	-0.884854	0.612185	1955	Cre06.g286150.t1.2/Cre06.g286150.t2.1	NA	NA									FALSE	FALSE		Cre16.g651650	Cre16.g667900
Cre09.g396438	7.2187	2.43864	16.4048	6.08756	-1.8462	-0.884555	0.730804	2280	Cre09.g396438.t1.1	NA	NA									FALSE	FALSE		Cre16.g688350	Cre03.g164250
Cre15.g641875	1.35724	0.289476	3.11403	1.00543	-1.84591	-0.884329	0.614826	1973	Cre15.g641875.t1.1	NA	PTHR10108:SF714 - METHYLTRANSFERASE OMS1, MITOCHONDRIAL (1 of 2)									FALSE	FALSE		Cre05.g243452	Cre06.g278188
Cre01.g023300	1.34774	0.44651	2.8185	0.156018	-1.84534	-0.883884	0.614281	1970	Cre01.g023300.t1.2	NA	PTHR22604:SF111 - NAD(P)-BINDING ROSSMANN-FOLD SUPERFAMILY PROTEIN (1 of 1)									FALSE	TRUE		Cre12.g494200	Cre16.g681850
Cre02.g080100	1.30018	0.307405	2.96915	0.904388	-1.84493	-0.883564	0.621739	1992	Cre02.g080100.t1.1	NA	Putative polyadenylation cleavage/specificity factor									FALSE	TRUE		Cre03.g175851	Cre10.g445150
Cre11.g467400	9.65779	5.47776	21.1001	8.78666	-1.84415	-0.882953	0.653983	2068	Cre11.g467400.t1.2	NA	NA									FALSE	TRUE		Cre07.g337914	Cre02.g102850
Cre10.g438550	4.87721	0.79333	11.3315	3.90177	-1.84373	-0.88263	0.653432	2066	Cre10.g438550.t1.2	TAT1	TatA-like sec-independent protein translocator subunit									FALSE	FALSE		Cre16.g676650	Cre03.g163150
Cre02.g118300	5.68391	4.22338	10.9043	4.53355	-1.84297	-0.882035	0.581877	1898	Cre02.g118300.t1.2	NA	DEAD box ATP-dependent RNA helicase									FALSE	FALSE		Cre09.g407016	Cre07.g349350
Cre03.g160800	1.04772	0.79836	2.29362	1.25003	-1.8422	-0.881432	0.609934	1957	Cre03.g160800.t1.2	MTP2	Cation efflux transporter, membrane protein									FALSE	TRUE		Cre14.g611000	Cre03.g210849
Cre17.g711900	1.69634	0.304972	3.67418	0.354776	-1.84211	-0.881362	0.622655	2004	Cre17.g711900.t1.1	NA	PF03567 - Sulfotransferase family (Sulfotransfer_2) (1 of 4)									FALSE	FALSE		Cre04.g216850	Cre09.g386743
Cre01.g038300	5.98491	3.06108	12.9244	3.89278	-1.84193	-0.881215	0.619067	1988	Cre01.g038300.t1.2	NA	PF02536 - mTERF (mTERF) (1 of 13)									FALSE	TRUE		Cre12.g501450	Cre10.g429850
Cre16.g664450	2.05143	1.12154	4.3025	1.41385	-1.84185	-0.881155	0.640311	2053	Cre16.g664450.t1.1	NA	PTHR12276:SF45 - CLATHRIN INTERACTOR 1 (1 of 1)									TRUE	FALSE		Cre12.g495952	Cre16.g671713
Cre16.g673852	0.0661612	0.0582412	0.243366	0.291181	-1.84155	-0.880918	0.576609	1894	Cre16.g673852.t1.1	NA	K01595 - phosphoenolpyruvate carboxylase (ppc) (1 of 2)									FALSE	TRUE		Cre01.g023950	Cre14.g633200
Cre01.g033550	10.3654	3.28607	24.9263	12.0338	-1.84139	-0.880792	0.685589	2174	Cre01.g033550.t1.2	PDI2	Protein disulfide isomerase									TRUE	FALSE		Cre10.g424850	Cre05.g247050
Cre06.g293800	0.797839	0.61922	1.67259	0.949563	-1.84128	-0.880713	0.594974	1932	Cre06.g293800.t1.1	NA	3.1.6.1 - Arylsulfatase / Sulfatase (1 of 19)									FALSE	TRUE		Cre07.g341650	Cre15.g637850
Cre12.g538150	1.58362	1.11788	4.46754	3.38623	-1.84084	-0.880366	0.583367	1911	Cre12.g538150.t1.2	NA	K05019 - chloride channel, nucleotide-sensitive, 1A (CLNS1A) (1 of 1)									FALSE	FALSE		Cre14.g626750	Cre06.g279600
Cre07.g323700	0.121693	0.0992546	0.266537	0.14207	-1.84059	-0.880168	0.584507	1913	Cre07.g323700.t1.1	NA	NA									FALSE	FALSE		Cre12.g522350	Cre03.g144404
Cre03.g199900	32.9696	18.7206	72.7496	32.2276	-1.84042	-0.880033	0.689901	2191	Cre03.g199900.t1.2	EIF4E	Eukaryotic translation initiation factor 4E									FALSE	FALSE		Cre13.g577450	Cre17.g725700
Cre01.g033450	0.203852	0.102593	0.606313	0.553523	-1.84003	-0.879731	0.580454	1906	Cre01.g033450.t1.2	NA	PTHR12393:SF6 - SPHINGOMYELIN PHOSPHODIESTERASE 2 (1 of 100)									FALSE	FALSE		Cre01.g009650	Cre02.g102950
Cre18.g748697	1.61485	0.0461341	3.56571	0.761097	-1.83981	-0.879556	0.664927	2113	Cre18.g748697.t1.1	NA	PTHR31362:SF0 - PROTEIN E03H4.4-RELATED (1 of 2)									FALSE	FALSE		Cre12.g516500	Cre02.g078650
Cre17.g724350	9.52379	6.53816	19.887	7.07356	-1.83933	-0.879182	0.660761	2101	Cre17.g724350.t1.2	POA5	20S proteasome alpha subunit E									TRUE	FALSE		Cre09.g396846	Cre11.g477300
Cre21.g752647	10.3914	5.88002	25.0905	15.2303	-1.83875	-0.878724	0.655842	2087	Cre21.g752647.t1.1	NA	NA									TRUE	FALSE		Cre10.g426350	Cre06.g260450
Cre10.g443950	3.87455	0.521138	8.59772	1.12438	-1.83869	-0.878678	0.763311	2422	Cre10.g443950.t1.1	NA	PF04564//PF05049 - U-box domain (U-box) // Interferon-inducible GTPase (IIGP) (IIGP) (1 of 2)									TRUE	FALSE		Cre09.g389801	Cre08.g363500
Cre03.g162100	0.322163	0.194912	0.80592	0.435783	-1.83837	-0.87843	0.586154	1923	Cre03.g162100.t1.2	NA	Protein-L-isoaspartate O-methyltransferase									FALSE	FALSE		Cre08.g358535	Cre06.g303850
Cre14.g618050	3.91813	1.02599	8.65672	1.73386	-1.83814	-0.878246	0.67743	2163	Cre14.g618050.t1.2	PLP3	Plastid lipid associated protein									FALSE	TRUE		Cre12.g532600	Cre05.g233400
Cre17.g735650	0.77908	0.10022	1.77102	0.478229	-1.83798	-0.878123	0.661329	2109	Cre17.g735650.t1.1	NA	NA									FALSE	FALSE		Cre12.g521150	Cre02.g074150
Cre11.g467709	9.18734	1.67028	20.5987	4.74649	-1.83792	-0.878071	0.617724	1996	Cre11.g467709.t1.1	NA	NA									FALSE	FALSE		Cre13.g562031	Cre12.g515950
Cre03.g158350	0.10388	0.0912183	0.204762	0.127405	-1.83727	-0.877562	0.575409	1903	Cre03.g158350.t1.2	NA	NA									FALSE	FALSE		Cre07.g352150	Cre19.g751297
Cre04.g214650	0.840635	0.164176	2.19585	1.55316	-1.8367	-0.877116	0.651979	2082	Cre04.g214650.t1.1	NA	1,3-beta-D-glucan synthase									FALSE	TRUE		Cre06.g278288	Cre12.g527800
Cre15.g636550	3.12221	2.11663	6.54812	3.40914	-1.83657	-0.877018	0.628712	2033	Cre15.g636550.t1.2/Cre15.g636550.t2.1	NA	NA									FALSE	FALSE		Cre12.g534650	Cre02.g115500
Cre12.g549850	0.52782	0.071058	1.29727	0.575312	-1.8365	-0.876959	0.625635	2028	Cre12.g549850.t1.1	NA	PF09445 - RNA cap guanine-N2 methyltransferase (Methyltransf_15) (1 of 1)									FALSE	TRUE		Cre12.g557252	Cre09.g391726
Cre08.g359300	2.09984	1.49716	5.14291	3.79707	-1.83565	-0.876293	0.602466	1960	Cre08.g359300.t1.2	PHO1	Alkaline phosphatase									FALSE	FALSE		Cre17.g720100	Cre17.g732400
Cre09.g386200	4.20048	0.855684	9.34325	2.13797	-1.83484	-0.875655	0.713261	2247	Cre09.g386200.t1.1	NA	PTHR21228 - FAST LEU-RICH DOMAIN-CONTAINING (1 of 85)									FALSE	TRUE		Cre09.g408800	Cre03.g144464
Cre02.g115508	13.9007	2.44485	33.4487	22.0347	-1.83441	-0.875315	0.662411	2119	Cre02.g115508.t1.1	NA	PTHR23155 - LEUCINE-RICH REPEAT-CONTAINING PROTEIN (1 of 15)									FALSE	TRUE		Cre02.g077250	Cre10.g455750
Cre07.g324000	1.62685	0.822855	3.50759	1.10288	-1.83406	-0.875039	0.677553	2168	Cre07.g324000.t1.2	NA	PTHR21286 - NUCLEAR PORE COMPLEX PROTEIN NUP160 (1 of 1)									FALSE	FALSE		Cre09.g396957	Cre03.g162601
Cre10.g452750	2.78075	0.896626	6.28511	2.56055	-1.83403	-0.875014	0.631168	2044	Cre10.g452750.t1.2	NA	PTHR11132//PTHR11132:SF125 - SOLUTE CARRIER FAMILY 35 // SUBFAMILY NOT NAMED (1 of 3)									FALSE	TRUE		Cre09.g402600	Cre17.g738751
Cre01.g007300	2.10304	0.926427	4.78633	1.80568	-1.83395	-0.874955	0.677654	2170	Cre01.g007300.t1.2	NA	3.1.4.54 - N-acetylphosphatidylethanolamine-hydrolyzing phospholipase D / N-acyl phosphatidylethanolamine phospholipase D (1 of 1)									TRUE	FALSE		Cre17.g744647	Cre05.g243472
Cre06.g296550	3.23131	1.11371	7.45405	3.07121	-1.83389	-0.874905	0.655714	2104	Cre06.g296550.t1.2	FMO3	Flavin-containing monooxygenase									FALSE	TRUE		Cre11.g480116	Cre17.g703400
Cre06.g254600	1.43337	0.583431	3.62215	2.24033	-1.83319	-0.874357	0.614847	2001	Cre06.g254600.t1.1	NA	NA									FALSE	FALSE		Cre17.g722550	Cre14.g627350
Cre03.g169300	0.976748	0.0754033	2.63215	1.81404	-1.83289	-0.87412	0.641362	2062	Cre03.g169300.t1.2/Cre03.g169300.t2.1	NA	K05681 - ATP-binding cassette, subfamily G (WHITE), member 2 (ABCG2) (1 of 2)									FALSE	FALSE		Cre03.g156476	Cre04.g211650
Cre02.g073300	1.11643	0.414702	3.34314	2.76525	-1.83242	-0.873754	0.605062	1975	Cre02.g073300.t1.1	NA	PTHR11804:SF5 - MITOCHONDRIAL INTERMEDIATE PEPTIDASE (1 of 2)									FALSE	FALSE		Cre06.g280800	Cre02.g119900
Cre03.g183350	0.847451	0.253144	1.92424	0.471781	-1.83178	-0.873246	0.692245	2209	Cre03.g183350.t1.1	NA	PTHR10799//PTHR10799:SF654 - SWI/SNF-RELATED MATRIX-ASSOCIATED ACTIN-DEPENDENT REGULATOR OF CHROMATIN SUBFAMILY-RELATED // SUBFAMILY NOT NAMED (1 of 1)									FALSE	FALSE		Cre06.g273500	Cre16.g694402
Cre02.g142326	0.0715507	0.0406062	0.165364	0.0640883	-1.83176	-0.873229	0.583429	1926	Cre02.g142326.t1.1	NA	NA									FALSE	FALSE		Cre08.g361350	Cre19.g750747
Cre10.g450600	2.30398	0.762775	4.96719	1.06968	-1.83175	-0.873219	0.58857	1939	Cre10.g450600.t1.1	NA	PTHR10024 - SYNAPTOTAGMIN (1 of 1)									FALSE	FALSE		Cre11.g467545	Cre13.g602950
Cre11.g479416	0.536022	0.210902	1.28621	0.670369	-1.83137	-0.872925	0.621298	2021	Cre11.g479416.t1.1	NA	NA									FALSE	TRUE		Cre12.g500050	Cre03.g149400
Cre14.g608250	0.0287732	0.0498366	0.0721592	0.065435	-1.83106	-0.872678	0.578925	1921	Cre14.g608250.t1.2	NA	NA									FALSE	FALSE		Cre01.g046800	Cre09.g399701
Cre12.g510300	1.63973	0.233372	3.67737	1.31856	-1.83106	-0.872677	0.72797	2296	Cre12.g510300.t1.1	NA	PF00179//PF10408 - Ubiquitin-conjugating enzyme (UQ_con) // Ubiquitin elongating factor core (Ufd2P_core) (1 of 1)									TRUE	FALSE		Cre09.g394325	Cre10.g439300
Cre17.g733678	0.650538	0.199547	1.48006	0.219117	-1.83046	-0.872208	0.638857	2061	Cre17.g733678.t1.2	NA	NA									TRUE	FALSE		Cre02.g083650	Cre09.g390900
Cre03.g204751	1.94827	1.2441	3.89132	1.14466	-1.83038	-0.872144	0.602783	1976	Cre03.g204751.t1.1	NA	2.7.8.11 - CDP-diacylglycerol--inositol 3-phosphatidyltransferase / Phosphatidylinositol synthase (1 of 4)									FALSE	FALSE		Cre17.g731100	Cre06.g278800
Cre10.g454250	0.210408	0.122284	0.546486	0.318796	-1.83012	-0.871938	0.579371	1922	Cre10.g454250.t1.2	NA	Peptidyl-prolyl cis-trans isomerase, FKBP-type									FALSE	TRUE		Cre09.g392616	Cre07.g335400
Cre09.g389430	9.36146	5.3342	20.2643	7.07941	-1.82955	-0.871486	0.713926	2258	Cre09.g389430.t1.1	NA	PTHR11538:SF40 - PHENYLALANINE--TRNA LIGASE ALPHA SUBUNIT (1 of 1)									FALSE	FALSE		Cre18.g749847	Cre13.g587850
Cre02.g083850	3.36415	1.74353	7.81972	4.17627	-1.82938	-0.871356	0.664956	2137	Cre02.g083850.t1.1/Cre02.g083850.t2.1	NA	NA									FALSE	FALSE		Cre16.g684300	Cre16.g674050
Cre09.g395843	0.610487	0.140954	1.36475	0.291676	-1.82912	-0.871151	0.682521	2188	Cre09.g395843.t1.1	NA	PTHR10579 - CALCIUM-ACTIVATED CHLORIDE CHANNEL REGULATOR (1 of 2)									FALSE	FALSE		Cre43.g760497	Cre11.g467706
Cre03.g185300	1.84048	0.41044	4.22109	1.34932	-1.82873	-0.870841	0.657196	2120	Cre03.g185300.t1.2	NA	K12446 - L-arabinokinase (E2.7.1.46) (1 of 1)									FALSE	TRUE		Cre01.g006656	Cre07.g342200
Cre07.g339554	1.20893	0.729314	2.71432	1.45658	-1.82864	-0.870771	0.64549	2084	Cre07.g339554.t1.2	NA	K03372 - MFS transporter, PAT family, solute carrier family 33 (acetyl-CoA transportor), member 1 (ACATN, SLC33A1) (1 of 1)									FALSE	FALSE		Cre09.g389851	Cre17.g709800
Cre06.g282251	0.274717	0.144765	0.634145	0.415779	-1.82809	-0.870337	0.58648	1940	Cre06.g282251.t1.2	NA	PF01753 - MYND finger (zf-MYND) (1 of 96)									FALSE	FALSE		Cre12.g536050	Cre09.g392208
Cre12.g490800	0.171286	0.121747	0.409286	0.273168	-1.82794	-0.870219	0.596279	1962	Cre12.g490800.t1.1	NA	PTHR23257//PTHR23257:SF513 - SERINE-THREONINE PROTEIN KINASE // SUBFAMILY NOT NAMED (1 of 40)									FALSE	TRUE		Cre16.g688050	Cre06.g280450
Cre13.g588959	0.616852	0.215932	1.31126	0.488773	-1.82791	-0.870193	0.656979	2122	Cre13.g588959.t1.2	NA	NA									FALSE	FALSE		Cre12.g556750	Cre16.g677350
Cre03.g197900	3.96043	1.85032	8.42173	2.22893	-1.82767	-0.870006	0.704452	2242	Cre03.g197900.t1.1	NA	PTHR24375:SF183 - C2H2 AND C2HC ZINC FINGERS SUPERFAMILY PROTEIN (1 of 1)									FALSE	TRUE		Cre12.g524400	Cre05.g237450
Cre02.g098950	2.74736	0.443761	6.63761	3.41194	-1.82757	-0.869927	0.683364	2194	Cre02.g098950.t1.2	NA	Late endosomal Qc-SNARE protein, Syx6/Tlg1/Syp5/6-family (Qc.III.b)									FALSE	FALSE		Cre02.g095076	Cre16.g672100
Cre01.g055050	1.70256	0.603313	4.06157	1.82643	-1.827	-0.869475	0.63264	2060	Cre01.g055050.t1.2	NA	K08597 - sentrin-specific protease 8 [EC:3.4.22.68] (SENP8, NEDP1, DEN1) (1 of 1)									FALSE	TRUE		Cre03.g209057	Cre02.g073400
Cre09.g400960	2.62966	0.796755	6.24492	3.00355	-1.82642	-0.869019	0.681036	2192	Cre09.g400960.t1.1	NA	PTHR20961:SF0 - EGF DOMAIN-SPECIFIC O-LINKED N-ACETYLGLUCOSAMINE TRANSFERASE (1 of 3)									TRUE	FALSE		Cre07.g353600	Cre03.g184850
Cre15.g640350	1.72583	0.570153	3.83119	1.10753	-1.82627	-0.868901	0.66602	2152	Cre15.g640350.t1.2	NA	PTHR21228 - FAST LEU-RICH DOMAIN-CONTAINING (1 of 85)									FALSE	TRUE		Cre10.g450000	Cre16.g672050
Cre01.g009250	0.912122	0.108648	2.07497	0.595875	-1.82624	-0.86888	0.665244	2148	Cre01.g009250.t1.1	TOP2	DNA topoisomerase II									FALSE	FALSE		Cre10.g463600	Cre19.g750597
Cre10.g435850	0.895351	0.470424	1.81221	0.310606	-1.82597	-0.868666	0.623756	2047	Cre10.g435850.t1.2	CPLD24	Predicted protein									FALSE	TRUE		Cre04.g213450	Cre04.g221600
Cre02.g108601	0.499328	0.0552922	1.26767	0.774149	-1.82585	-0.868565	0.632326	2059	Cre02.g108601.t1.1	NA	2.7.10.2//2.7.12.1 - Non-specific protein-tyrosine kinase / Cytoplasmic protein tyrosine kinase (1 of 8)									FALSE	FALSE		Cre09.g387600	Cre02.g095122
Cre17.g702400	0.920207	0.385896	2.12032	0.908024	-1.82577	-0.868509	0.622963	2039	Cre17.g702400.t1.2	PUS5	tRNA-pseudouridine synthase									FALSE	TRUE		Cre10.g424050	Cre16.g694201
Cre16.g685217	4.97113	1.9829	10.4894	2.94652	-1.82483	-0.867759	0.68003	2193	Cre16.g685217.t1.1	NA	K14307 - nucleoporin p58/p45 (NUPL1, NUP49) (1 of 1)									FALSE	FALSE		Cre12.g509400	Cre09.g388600
Cre17.g711150	0.455033	0.383175	1.03084	0.74886	-1.82468	-0.867641	0.588322	1949	Cre17.g711150.t1.2	NA	K10256 - omega-6 fatty acid desaturase (delta-12 desaturase) (FAD2) (1 of 1)									TRUE	FALSE		Cre11.g467746	Cre01.g051800
Cre17.g704850	7.2007	2.90128	15.9923	5.21807	-1.82439	-0.867417	0.687487	2211	Cre17.g704850.t1.2	NA	K00759 - adenine phosphoribosyltransferase (APRT, apt) (1 of 1)									FALSE	FALSE		Cre10.g427400	Cre11.g467950
Cre12.g555200	1.79805	0.0611794	4.15342	1.85742	-1.82406	-0.86715	0.644431	2091	Cre12.g555200.t1.1	NA	PTHR21780:SF0 - TRANSMEMBRANE PROTEIN 209 (1 of 1)									FALSE	TRUE		Cre01.g028000	Cre01.g041000
Cre09.g412300	4.17381	1.2031	10.016	4.38875	-1.82391	-0.867032	0.66598	2156	Cre09.g412300.t1.2	TIM16	Presequence translocase-associated protein import motor subunit									TRUE	FALSE		Cre13.g569050	Cre12.g547400
Cre08.g375350	1.00048	0.396759	2.06679	0.30012	-1.82301	-0.866322	0.653602	2123	Cre08.g375350.t1.2	NA	K19329 - WW domain-containing oxidoreductase (WWOX) (1 of 2)									FALSE	FALSE		Cre05.g248200	Cre12.g560800
Cre06.g277450	1.30226	0.52124	2.75879	0.809167	-1.82301	-0.866321	0.601083	1986	Cre06.g277450.t1.2	NA	NA									FALSE	FALSE		Cre06.g285500	Cre16.g675850
Cre06.g275450	3.11652	0.723391	6.9109	2.04702	-1.82249	-0.86591	0.657381	2135	Cre06.g275450.t1.1	NA	PF00069//PF13855 - Protein kinase domain (Pkinase) // Leucine rich repeat (LRR_8) (1 of 1)									FALSE	TRUE		Cre13.g567100	Cre12.g511000
Cre08.g378150	8.72513	4.02452	22.248	15.6437	-1.82248	-0.8659	0.648819	2115	Cre08.g378150.t1.1	GLD2	Glucose-6-phosphate dehydrogenase									FALSE	FALSE		Cre13.g591450	Cre07.g325450
Cre09.g417250	4.36653	1.07628	9.67194	3.05463	-1.82206	-0.86557	0.67671	2185	Cre09.g417250.t1.1	ELG27	Exostosin-like glycosyltransferase									FALSE	TRUE		Cre06.g278122	Cre10.g446500
Cre43.g760647	0.797108	0.395143	2.23366	1.92644	-1.82149	-0.865121	0.610023	2008	Cre43.g760647.t1.1	NA	NA									FALSE	TRUE		Cre16.g652750	Cre09.g402552
Cre05.g232004	0.688349	0.352118	1.55608	0.63711	-1.82	-0.863941	0.589267	1967	Cre05.g232004.t1.1	NA	PF00035 - Double-stranded RNA binding motif (dsrm) (1 of 4)									FALSE	TRUE		Cre06.g281100	Cre12.g555600
Cre09.g412150	1.91673	0.764415	4.51651	2.25581	-1.81943	-0.863485	0.686355	2216	Cre09.g412150.t1.1	NA	NA									TRUE	FALSE		Cre04.g216950	Cre01.g001657
Cre02.g087500	1.44654	0.631582	3.19362	0.746174	-1.81933	-0.863405	0.63746	2081	Cre02.g087500.t1.1	NA	NA									FALSE	TRUE		Cre06.g281050	Cre16.g677550
Cre06.g281200	0.644679	0.130858	1.48245	0.452694	-1.8187	-0.862908	0.633001	2074	Cre06.g281200.t1.1	NA	K16743 - abnormal spindle-like microcephaly-associated protein (ASPM, ASP) (1 of 1)									TRUE	FALSE		Cre16.g653601	Cre17.g716750
Cre14.g624700	0.1331	0.0766571	0.278137	0.115698	-1.81868	-0.862896	0.589189	1968	Cre14.g624700.t1.2	NA	NA									FALSE	FALSE		Cre12.g554450	Cre01.g044600
Cre14.g632000	0.847277	0.121357	1.83079	0.397824	-1.81845	-0.862712	0.629317	2063	Cre14.g632000.t1.1	CGE2	GrpE nucleotide release factor									FALSE	TRUE		Cre06.g269865	Cre01.g005550
Cre08.g384850	0.0420198	0.0727805	0.226368	0.39208	-1.81801	-0.86236	0.584556	1948	Cre08.g384850.t1.1	NA	1.1.1.1 - Alcohol dehydrogenase / Aldehyde reductase (1 of 8)									TRUE	FALSE		Cre10.g456420	Cre16.g677900
Cre06.g301400	0.0526433	0.0911808	0.283598	0.491206	-1.81801	-0.86236	0.588057	1964	Cre06.g301400.t1.1	NA	NA									FALSE	FALSE		Cre12.g514250	Cre14.g630350
Cre06.g265750	3.49768	0.654905	7.81593	1.6433	-1.81775	-0.862151	0.739411	2350	Cre06.g265750.t1.1	NA	K09668 - glycosyltransferase-like protein LARGE (LARGE) (1 of 2)									FALSE	TRUE		Cre02.g096500	Cre12.g557300
Cre06.g287350	8.45385	5.6048	17.7406	6.00163	-1.81769	-0.862108	0.674025	2190	Cre06.g287350.t1.1	NA	PF07460 - NUMOD3 motif (2 copies) (NUMOD3) (1 of 14)									FALSE	FALSE		Cre11.g475432	Cre02.g103000
Cre17.g725350	15.2112	9.31491	31.7647	11.0599	-1.81703	-0.861586	0.709659	2275	Cre17.g725350.t1.1/Cre17.g725350.t2.1	NA	PTHR12630 - N-LINKED OLIGOSACCHARIDE PROCESSING (1 of 1)									FALSE	FALSE		Cre03.g204212	Cre07.g321000
Cre15.g637700	0.201805	0.125327	0.419858	0.136995	-1.81685	-0.861438	0.600064	1997	Cre15.g637700.t1.2	NA	NA									FALSE	FALSE		Cre09.g402050	Cre17.g727550
Cre03.g200650	1.58122	1.0295	3.96806	2.89733	-1.8163	-0.861004	0.606603	2013	Cre03.g200650.t1.1	NA	K17525 - chitinase domain-containing protein 1 (CHID1) (1 of 1)									FALSE	FALSE		Cre11.g482650	Cre01.g044350
Cre13.g577352	0.0434818	0.0508728	0.0801568	0.0297372	-1.81606	-0.860812	0.584006	1947	Cre13.g577352.t1.1	NA	NA									FALSE	FALSE		Cre08.g377400	Cre16.g695900
Cre10.g430200	0.0397196	0.0687964	0.0667664	0.0258753	-1.81551	-0.860374	0.586298	1963	Cre10.g430200.t1.2/Cre10.g430200.t2.1	ARS3	Arylsulfatase									FALSE	TRUE		Cre13.g579050	Cre17.g716625
Cre13.g588250	0.210634	0.0874945	0.469785	0.221023	-1.81541	-0.860298	0.583282	1946	Cre13.g588250.t1.1	NA	K16457 - centrosomal protein CEP76 (CEP76) (1 of 1)									FALSE	FALSE		Cre12.g545300	Cre17.g702750
Cre12.g489700	16.5809	8.02069	39.5267	23.8965	-1.81508	-0.860029	0.678489	2202	Cre12.g489700.t1.2	OTC1	Ornithine carbamoyltransferase									FALSE	TRUE		Cre17.g704550	Cre13.g564766
Cre12.g545752	0.0460628	0.0797832	0.140283	0.127211	-1.81359	-0.858846	0.584509	1958	Cre12.g545752.t1.1	NA	NA									FALSE	FALSE		Cre07.g340250	Cre13.g564426
Cre06.g254250	0	0	0.0504426	0.0873692	-1.81352	-0.858794	0.584081	1959	Cre06.g254250.t1.2	NA	NA									FALSE	FALSE		Cre16.g664700	Cre01.g005750
Cre12.g495701	0	0	0.0346121	0.0599498	-1.81352	-0.858794	0.584119	1956	Cre12.g495701.t1.1	NA	PF00530 - Scavenger receptor cysteine-rich domain (SRCR) (1 of 37)									FALSE	FALSE		Cre06.g250350	Cre02.g114450
Cre09.g407550	0	0	0.023784	0.0411951	-1.81352	-0.858794	0.585103	1965	Cre09.g407550.t1.2	NA	PF02037 - SAP domain (SAP) (1 of 12)									FALSE	TRUE		Cre02.g075850	Cre05.g246150
Cre14.g628566	0	0	0.0854568	0.148015	-1.81352	-0.858794	0.585224	1966	Cre14.g628566.t1.1	NA	NA									FALSE	FALSE		Cre12.g505700	Cre15.g640450
Cre12.g551001	0	0	0.0476921	0.0826051	-1.81352	-0.858794	0.587345	1978	Cre12.g551001.t1.1	NA	PTHR31802:SF3 - 32 KDA HEAT SHOCK PROTEIN (1 of 2)									FALSE	FALSE		Cre13.g562200	Cre16.g661350
Cre02.g142606	0	0	0.038865	0.0673162	-1.81352	-0.858794	0.596732	1998	Cre02.g142606.t1.1	NA	NA									FALSE	FALSE		Cre10.g438450	Cre01.g023800
Cre03.g152200	0	0	0.054369	0.0941699	-1.81352	-0.858794	0.603026	2010	Cre03.g152200.t1.1	NA	NA									FALSE	FALSE		Cre13.g577950	Cre05.g246550
Cre10.g455050	0	0	0.0303783	0.0526168	-1.81352	-0.858794	0.603428	2011	Cre10.g455050.t1.2/Cre10.g455050.t2.1	NA	PTHR11220:SF1 - HEME-BINDING PROTEIN 1 (1 of 3)									FALSE	FALSE		Cre06.g278163	Cre02.g119650
Cre07.g341925	0.611915	0.259038	1.41379	0.66724	-1.81334	-0.858648	0.661853	2164	Cre07.g341925.t1.2	NA	NA									FALSE	FALSE		Cre03.g163500	Cre01.g026950
Cre06.g295500	2.69263	1.04515	5.73946	0.392719	-1.81278	-0.858203	0.647103	2130	Cre06.g295500.t1.2	NA	NA									FALSE	TRUE		Cre14.g617100	Cre03.g146107
Cre12.g500650	1.91784	0.641971	4.21495	1.40848	-1.81262	-0.858079	0.716639	2297	Cre12.g500650.t1.2	RNB2	3-5 exoribonuclease II									FALSE	FALSE		Cre12.g518100	Cre13.g576800
Cre02.g116800	0.294516	0.128617	0.799472	0.566708	-1.81259	-0.858052	0.620477	2055	Cre02.g116800.t1.1	NA	PTHR12381:SF46 - SAP DNA-BINDING DOMAIN-CONTAINING PROTEIN (1 of 1)									FALSE	TRUE		Cre02.g076550	Cre05.g239750
Cre14.g626800	0.449745	0.132584	1.14352	0.731489	-1.8125	-0.857979	0.640544	2116	Cre14.g626800.t1.1	NA	NA									FALSE	FALSE		Cre01.g016850	Cre12.g547500
Cre03.g183150	0.864172	0.542797	1.73806	0.300391	-1.81167	-0.857322	0.656213	2161	Cre03.g183150.t1.1	NA	3.4.24.21 - Astacin / Crayfish small-molecule proteinase (1 of 1)									FALSE	FALSE		Cre02.g116600	Cre06.g278176
Cre02.g073700	9.11488	2.77434	20.7354	7.21017	-1.81155	-0.857227	0.74933	2410	Cre02.g073700.t1.2/Cre02.g073700.t2.1	UPD3	Uroporphyrinogen decarboxylase									FALSE	TRUE		Cre01.g017050	Cre16.g669600
Cre17.g735900	0.0296044	0.00368289	0.0778082	0.025388	-1.8114	-0.857106	0.595176	2003	Cre17.g735900.t1.1	NA	NA									FALSE	FALSE		Cre12.g498450	Cre05.g240950
Cre04.g220300	0.975283	0.724865	2.24587	1.63051	-1.81103	-0.85681	0.624655	2071	Cre04.g220300.t1.2	NA	PTHR22847 - WD40 REPEAT PROTEIN (1 of 49)									FALSE	TRUE		Cre01.g035700	Cre06.g278196
Cre01.g001350	0.46311	0.233033	1.18375	0.841638	-1.81022	-0.856167	0.631439	2090	Cre01.g001350.t1.2	NA	PTHR11384:SF3 - INNER MEMBRANE ABC TRANSPORTER ATP-BINDING PROTEIN YDDA-RELATED (1 of 2)									FALSE	FALSE		Cre17.g709850	Cre10.g451400
Cre17.g726250	0.74355	0.379722	1.61019	0.972315	-1.8101	-0.856071	0.612672	2038	Cre17.g726250.t1.2	ATP12	Assembly factor 2 for F1 mitochondrial ATP synthase									TRUE	FALSE		Cre12.g487450	Cre09.g398051
Cre09.g403145	2.13142	0.780355	4.54513	0.419023	-1.80998	-0.855978	0.67322	2206	Cre09.g403145.t1.1	NA	NA									FALSE	TRUE		Cre07.g350800	Cre03.g202350
Cre01.g010848	3.45784	0.794582	8.21585	3.75689	-1.80976	-0.855801	0.6438	2128	Cre01.g010848.t1.1	NA	K06997 - uncharacterized protein (K06997) (1 of 1)									FALSE	TRUE		Cre07.g325715	Cre16.g688901
Cre13.g562000	0.872801	0.150845	2.39807	1.7744	-1.80967	-0.855728	0.622518	2064	Cre13.g562000.t1.1	NA	3.1.26.4 - Ribonuclease H / RNase H (1 of 23)									FALSE	FALSE		Cre09.g400775	Cre11.g477625
Cre03.g185000	0.0795451	0.0553742	0.157857	0.0601232	-1.80962	-0.855685	0.596302	2009	Cre03.g185000.t1.1	NA	1,3-beta-D-glucan synthase									FALSE	FALSE		Cre09.g397068	Cre16.g678450
Cre14.g609250	0.186443	0.0938164	0.458429	0.262378	-1.80955	-0.855634	0.614397	2052	Cre14.g609250.t1.1	NA	PF13839 - GDSL/SGNH-like Acyl-Esterase family found in Pmr5 and Cas1p (PC-Esterase) (1 of 1)									FALSE	FALSE		Cre09.g394250	Cre16.g673600
Cre16.g694750	2.16604	0.641478	4.61831	0.549493	-1.80942	-0.855528	0.693839	2256	Cre16.g694750.t1.2	NA	PTHR12203 - KDEL LYS-ASP-GLU-LEU CONTAINING - RELATED (1 of 83)									FALSE	TRUE		Cre12.g539000	Cre05.g237200
Cre03.g172322	1.07841	1.1626	2.07476	1.37253	-1.80928	-0.855418	0.597209	2015	Cre03.g172322.t1.2	NA	PTHR15439:SF4 - ZINC FINGER CCHC DOMAIN-CONTAINING PROTEIN 24 (1 of 3)									TRUE	FALSE		Cre16.g652850	Cre06.g278234
Cre06.g258250	0.248043	0.0530821	0.616673	0.336843	-1.80843	-0.854735	0.610374	2036	Cre06.g258250.t1.1	NA	NA									FALSE	FALSE		Cre04.g231516	Cre02.g095054
Cre16.g671150	0.774161	0.343611	1.61405	0.121669	-1.80802	-0.854412	0.635692	2118	Cre16.g671150.t1.2	NA	PTHR12770:SF22 - UPF0420 PROTEIN C16ORF58 (1 of 1)									FALSE	FALSE		Cre06.g304800	Cre02.g095130
Cre17.g746997	113.59	57.8007	246.895	123.867	-1.80798	-0.854375	0.677684	2221	Cre17.g746997.t1.1	ADH1	Dual function alcohol/acetaldehyde dehydrogenase									FALSE	TRUE		Cre16.g653900	Cre17.g704450
Cre03.g202851	0.0528602	0.0642879	0.0851565	0.0372247	-1.80728	-0.853822	0.587322	1991	Cre03.g202851.t1.1	NA	NA									FALSE	FALSE		Cre06.g265602	Cre17.g746847
Cre35.g759497	1.65852	0.677705	3.55725	1.16501	-1.80721	-0.853761	0.628458	2093	Cre35.g759497.t1.1	NA	NA									TRUE	FALSE		Cre07.g345150	Cre09.g387615
Cre12.g491950	0.162387	0.184413	0.709939	0.872122	-1.80719	-0.85375	0.589029	1999	Cre12.g491950.t1.2	NA	NA									FALSE	FALSE		Cre03.g178650	Cre04.g223250
Cre06.g286050	2.2968	0.905287	4.82825	0.342495	-1.80689	-0.853511	0.695557	2268	Cre06.g286050.t1.2	NA	K15118 - solute carrier family 25, member 38 (SLC25A38) (1 of 1)									FALSE	TRUE		Cre09.g387000	Cre17.g736300
Cre11.g467563	0.427103	0.239584	0.96863	0.526775	-1.80672	-0.85337	0.623535	2079	Cre11.g467563.t1.1	NA	PTHR10174 - RETINALDEHYDE BINDING PROTEIN-RELATED (1 of 10)									FALSE	FALSE		Cre05.g232350	Cre07.g334900
Cre07.g351850	5.65951	2.904	11.9229	2.85499	-1.80598	-0.852783	0.654546	2166	Cre07.g351850.t1.2	NA	PF00583 - Acetyltransferase (GNAT) family (Acetyltransf_1) (1 of 35)									FALSE	FALSE		Cre12.g552950	Cre03.g146187
Cre03.g163250	1.12074	1.04481	2.00961	0.45265	-1.80568	-0.852544	0.610969	2046	Cre03.g163250.t1.1	NA	NA									FALSE	FALSE		Cre01.g048450	Cre11.g467750
Cre03.g196250	19.3174	4.77265	42.0472	9.80477	-1.8051	-0.852081	0.812678	2658	Cre03.g196250.t1.1	NA	3.4.22.1 - Cathepsin B / Cathepsin B1 (1 of 1)									FALSE	FALSE		Cre16.g685650	Cre17.g716101
Cre17.g711050	1.34111	0.918386	2.86389	1.60353	-1.80488	-0.851907	0.614879	2057	Cre17.g711050.t1.1	NA	K15456 - protein KTI12 (KTI12) (1 of 1)									FALSE	FALSE		Cre15.g641850	Cre09.g393099
Cre03.g186550	0.644885	0.461258	1.28193	0.432778	-1.80428	-0.851426	0.620461	2069	Cre03.g186550.t1.1	NA	K11137 - telomere length regulation protein (TELO2, TEL2) (1 of 1)									TRUE	FALSE		Cre06.g297516	Cre03.g154726
Cre12.g521800	0.112919	0.0785888	0.325955	0.2575	-1.80408	-0.851267	0.599401	2027	Cre12.g521800.t1.2	NA	NA									FALSE	FALSE		Cre17.g709350	Cre13.g572500
Cre09.g388801	3.94217	0.582371	8.4581	1.908	-1.80394	-0.851151	0.821467	2698	Cre09.g388801.t1.1	NA	NA									TRUE	FALSE		Cre11.g477750	Cre03.g149851
Cre11.g469375	1.6461	1.16685	3.54877	1.83475	-1.80362	-0.850896	0.662018	2180	Cre11.g469375.t1.1	NA	PTHR32523:SF8 - PHYTOL KINASE 1, CHLOROPLASTIC (1 of 56)									FALSE	FALSE		Cre11.g467747	Cre01.g042300
Cre01.g002400	0.880151	0.3008	2.51069	2.12485	-1.80185	-0.84948	0.623968	2092	Cre01.g002400.t1.1	NA	PTHR21493:SF119 - TRIGLYCERIDE LIPASE-RELATED (1 of 1)									FALSE	FALSE		Cre07.g333150	Cre01.g019600
Cre02.g105287	0.425428	0.39111	0.857718	0.466457	-1.80166	-0.849329	0.599195	2030	Cre02.g105287.t1.2	NA	KOG1994 - Predicted RNA binding protein, contains G-patch and Zn-finger domains (1 of 1)									FALSE	FALSE		Cre13.g605368	Cre09.g413200
Cre13.g579800	0.898863	0.424716	2.00639	0.60877	-1.80095	-0.848756	0.625725	2103	Cre13.g579800.t1.2	NA	PTHR11063:SF6 - AMINO ACID KINASE (1 of 1)									TRUE	FALSE		Cre10.g426616	Cre10.g423150
Cre07.g316150	1.16516	0.614329	2.49716	0.902535	-1.80091	-0.848723	0.641296	2146	Cre07.g316150.t1.1	NA	3.4.19.12 - Ubiquitinyl hydrolase 1 / Ubiquitin thiolesterase (1 of 110)									FALSE	TRUE		Cre17.g731150	Cre09.g396735
Cre03.g158450	0.445489	0.348493	1.05974	0.821133	-1.80083	-0.848666	0.612074	2054	Cre03.g158450.t1.2	NA	NA									FALSE	TRUE		Cre16.g673465	Cre01.g045800
Cre01.g000050	1.68183	1.06446	3.72322	1.90152	-1.80008	-0.848062	0.671319	2219	Cre01.g000050.t1.1	RWP14	RWP-RK transcription factor									FALSE	TRUE		Cre16.g648550	Cre14.g617550
Cre05.g238687	121.174	55.4419	242.803	17.736	-1.80001	-0.848007	0.720008	2330	Cre05.g238687.t1.1	NA	PF12499 - Pherophorin (DUF3707) (1 of 70)									FALSE	FALSE		Cre02.g090750	Cre07.g338800
Cre16.g676100	0.120189	0.105801	0.261908	0.268585	-1.79971	-0.847764	0.592289	2022	Cre16.g676100.t1.2	NA	PF07707 - BTB And C-terminal Kelch (BACK) (1 of 15)									FALSE	FALSE		Cre10.g427600	Cre07.g316500
Cre03.g164700	3.24951	1.02509	7.07652	2.33934	-1.79965	-0.847719	0.671708	2223	Cre03.g164700.t1.2	NA	NA									FALSE	TRUE		Cre01.g054300	Cre06.g275250
Cre09.g406432	0.392537	0.519061	0.442498	0.124704	-1.79833	-0.846655	0.633378	2133	Cre09.g406432.t1.1/Cre09.g406432.t2.1/Cre09.g406432.t3.1	NA	PF07645 - Calcium-binding EGF domain (EGF_CA) (1 of 5)									FALSE	FALSE		Cre07.g319300	Cre12.g534550
Cre10.g435900	1.04346	0.559427	2.2059	1.07193	-1.79815	-0.84651	0.601301	2042	Cre10.g435900.t1.1	NA	NA									FALSE	FALSE		Cre06.g281400	Cre09.g393400
Cre03.g152500	1.73925	0.68919	3.65302	0.71196	-1.79735	-0.845874	0.684059	2253	Cre03.g152500.t1.1	NA	PTHR12197 - SET AND MYND DOMAIN CONTAINING (1 of 21)									FALSE	FALSE		Cre06.g270000	Cre06.g290450
Cre06.g284950	5.17071	2.0456	11.305	3.23295	-1.79735	-0.845868	0.710142	2315	Cre06.g284950.t1.1	NA	NA									FALSE	FALSE		Cre10.g432500	Cre08.g358650
Cre06.g278097	5.70794	2.19245	12.4092	3.6438	-1.79715	-0.845708	0.774108	2554	Cre06.g278097.t1.1	RAE1	mRNA export protein									TRUE	FALSE		Cre09.g395950	Cre01.g034250
Cre03.g200800	2.52728	0.494793	5.60668	1.96862	-1.79705	-0.845631	0.792508	2611	Cre03.g200800.t1.1	NA	4.6.1.1//4.6.1.2 - Adenylate cyclase / ATP pyrophosphate-lyase // Guanylate cyclase / Guanylyl cyclase (1 of 8)									FALSE	TRUE		Cre16.g674602	Cre08.g381350
Cre16.g651850	0.1477	0.0471606	0.348418	0.127879	-1.79693	-0.845537	0.656586	2186	Cre16.g651850.t1.1	NA	PTHR13367 - TUMOR NECROSIS FACTOR-RELATED (1 of 3)									FALSE	FALSE		Cre06.g310000	Cre13.g581850
Cre17.g706050	4.54704	1.47718	10.1462	4.3647	-1.7969	-0.845511	0.803398	2650	Cre17.g706050.t1.1/Cre17.g706050.t2.1/Cre17.g706050.t3.1	NA	PTHR19331//PTHR19331:SF328 - LYSYL OXIDASE-RELATED // SUBFAMILY NOT NAMED (1 of 4)									FALSE	TRUE		Cre11.g483150	Cre03.g203950
Cre01.g029300	40.1349	21.2173	84.7242	30.3996	-1.79678	-0.845411	0.7626	2487	Cre01.g029300.t1.2	TPI1	Triose phosphate isomerase									FALSE	FALSE		Cre04.g219350	Cre06.g256250
Cre07.g339400	0.986774	0.283504	2.29201	1.06338	-1.79675	-0.845388	0.623548	2112	Cre07.g339400.t1.1	NA	PTHR10157 - DOPAMINE BETA HYDROXYLASE RELATED (1 of 33)									FALSE	FALSE		Cre17.g719950	Cre12.g516851
Cre13.g581050	1.46411	0.29659	3.18659	0.498719	-1.79651	-0.845194	0.671423	2229	Cre13.g581050.t1.1/Cre13.g581050.t2.1	NA	2.4.2.26 - Protein xylosyltransferase / Uridine diphosphoxylose-protein xylosyltransferase (1 of 11)									FALSE	TRUE		Cre01.g030800	Cre13.g586100
Cre16.g682450	1.41405	0.258862	3.03108	0.619333	-1.79634	-0.845061	0.705441	2312	Cre16.g682450.t1.1/Cre16.g682450.t2.1	NA	PF13857 - Ankyrin repeats (many copies) (Ank_5) (1 of 14)									FALSE	TRUE		Cre01.g023900	Cre03.g207600
Cre08.g385951	0.30586	0.19409	0.579711	0.0394639	-1.79629	-0.845019	0.620867	2097	Cre08.g385951.t1.2	NA	NA									FALSE	FALSE		Cre06.g264550	Cre12.g488351
Cre09.g393991	1.50335	0.583924	3.23728	1.00206	-1.79577	-0.844604	0.766811	2515	Cre09.g393991.t1.1	NA	NA									FALSE	TRUE		Cre06.g310500	Cre10.g452750
Cre03.g206900	2.11431	0.374186	4.8889	2.2085	-1.79545	-0.844344	0.724394	2351	Cre03.g206900.t1.1	NA	PTHR12984:SF6 - SCY1-LIKE PROTEIN 2 (1 of 1)									TRUE	FALSE		Cre14.g608050	Cre02.g143467
Cre04.g212450	2.09839	0.845441	5.12483	3.19841	-1.79541	-0.84431	0.69226	2287	Cre04.g212450.t1.2	NA	NA									FALSE	FALSE		Cre06.g287650	Cre09.g414900
Cre12.g518950	1.50035	0.540539	3.94048	2.85724	-1.7954	-0.844307	0.674538	2237	Cre12.g518950.t1.2	NA	PTHR23029:SF12 - PHOSPHOMUTASE PMU1-RELATED (1 of 2)									TRUE	FALSE		Cre14.g619613	Cre16.g669950
Cre17.g729900	1.12542	0.532149	2.33773	0.363378	-1.79533	-0.84425	0.619206	2094	Cre17.g729900.t1.2	NA	NA									FALSE	TRUE		Cre16.g670250	Cre13.g588750
Cre13.g570350	21.3843	4.0367	47.5793	16.9603	-1.7946	-0.843659	0.820008	2713	Cre13.g570350.t1.1/Cre13.g570350.t2.1	AKC4	ABC1-like kinase									FALSE	FALSE		Cre06.g295700	Cre17.g724900
Cre10.g449650	1.2671	0.340286	2.72856	0.636639	-1.79445	-0.843541	0.673091	2233	Cre10.g449650.t1.1	NA	NA									FALSE	TRUE		Cre11.g467669	Cre02.g115900
Cre03.g167712	0.0227111	0.0393368	0.0697711	0.0605496	-1.79436	-0.843468	0.59323	2037	Cre03.g167712.t1.1	NA	PTHR19297//PTHR19297:SF85 - GLYCOSYLTRANSFERASE 14 FAMILY MEMBER // SUBFAMILY NOT NAMED (1 of 2)									FALSE	FALSE		Cre10.g457000	Cre07.g325722
Cre16.g674179	0.0187207	0.0324253	0.132068	0.17159	-1.79343	-0.842719	0.596602	2051	Cre16.g674179.t1.1	NA	PTHR24349:SF79 - NITROGEN NETWORK KINASE 1 (1 of 29)									FALSE	FALSE		Cre03.g186200	Cre14.g612750
Cre12.g497100	6.04038	2.54973	13.8165	6.05881	-1.79342	-0.842712	0.761708	2489	Cre12.g497100.t1.2	NA	NA									FALSE	FALSE		Cre13.g573100	Cre09.g393551
Cre06.g311250	0.117385	0.0144328	0.301709	0.179135	-1.79243	-0.84192	0.666017	2222	Cre06.g311250.t1.1	NA	PTHR23213//PTHR23213:SF214 - FORMIN-RELATED // SUBFAMILY NOT NAMED (1 of 3)									FALSE	FALSE		Cre10.g441326	Cre12.g525300
Cre17.g696250	11.3026	5.40994	24.7716	10.8768	-1.79234	-0.841844	0.764794	2508	Cre17.g696250.t1.1/Cre17.g696250.t2.1	NA	K03260 - translation initiation factor 4G (EIF4G) (1 of 2)									TRUE	FALSE		Cre01.g051950	Cre09.g393100
Cre03.g178014	0.168751	0.148183	0.379546	0.0827983	-1.79225	-0.841769	0.616979	2098	Cre03.g178014.t1.2	NA	NA									FALSE	FALSE		Cre03.g150550	Cre02.g095072
Cre06.g308500	57.2949	25.9274	128.837	69.6383	-1.79209	-0.841645	0.718877	2341	Cre06.g308500.t1.2	CMP2	Carbamoyl phosphate synthase, small subunit									FALSE	TRUE		Cre10.g457050	Cre07.g325717
Cre13.g565850	11.2268	4.36088	24.8581	10.0984	-1.79208	-0.841638	0.796343	2637	Cre13.g565850.t1.1	COPA1	Alpha subunit of COP-I complex									TRUE	FALSE		Cre07.g326400	Cre16.g688900
Cre13.g592200	103.269	59.2172	221.606	116.559	-1.791	-0.840768	0.742356	2434	Cre13.g592200.t1.2	GSN1	Glutamate synthase, NADH-dependent									FALSE	TRUE		Cre16.g692400	Cre12.g543052
Cre06.g286000	0.577056	0.313465	1.18219	0.142662	-1.79009	-0.840028	0.644684	2178	Cre06.g286000.t1.2	NA	NA									FALSE	FALSE		Cre06.g262000	Cre10.g426700
Cre04.g227700	5.8464	2.72098	12.9131	6.60043	-1.79006	-0.840009	0.674491	2252	Cre04.g227700.t1.1	NA	NA									FALSE	TRUE		Cre17.g715150	Cre09.g399663
Cre12.g514850	18.9901	12.1552	37.937	14.0607	-1.78958	-0.839618	0.727295	2370	Cre12.g514850.t1.2	HSP90C	Heat shock protein 90C									TRUE	FALSE		Cre12.g490500	Cre09.g403750
Cre02.g093750	2.44005	0.45553	5.39579	1.52157	-1.7895	-0.83956	0.688273	2291	Cre02.g093750.t1.2	NRX2	Nucleoredoxin 2									TRUE	FALSE		Cre01.g041256	Cre03.g197100
Cre06.g306601	8.72764	4.13151	18.0596	5.78663	-1.78912	-0.839247	0.759333	2484	Cre06.g306601.t1.1	NA	2.1.1.148 - Thymidylate synthase (FAD) / Flavin dependent thymidylate synthase (1 of 1)									FALSE	FALSE		Cre13.g562850	Cre12.g528250
Cre10.g419750	4.13908	2.90236	8.40789	2.77714	-1.78899	-0.839144	0.719563	2348	Cre10.g419750.t1.2	RPB3	DNA-directed RNA polymerase II, 36 kDa polypeptide									FALSE	FALSE		Cre12.g493650	Cre09.g400450
Cre02.g095069	1.72962	0.805263	4.06253	2.18408	-1.78853	-0.838773	0.675342	2255	Cre02.g095069.t1.1	NA	PTHR10681:SF119 - PEROXIREDOXIN DOT5 (1 of 1)									FALSE	TRUE		Cre06.g273800	Cre14.g632501
Cre07.g330600	1.05181	0.367925	2.33769	0.837138	-1.78837	-0.838643	0.645632	2184	Cre07.g330600.t1.1	NA	K01510 - apyrase (ENTPD1_3_8) (1 of 2)									FALSE	FALSE		Cre12.g488050	Cre11.g479416
Cre17.g736400	0.806286	0.217187	1.91348	0.946029	-1.78777	-0.838158	0.670892	2241	Cre17.g736400.t1.1	NA	K06671 - cohesin complex subunit SA-1/2 (STAG1_2, SCC3, IRR1) (1 of 1)									FALSE	FALSE		Cre12.g521400	Cre02.g097900
Cre08.g383750	1.85964	1.33888	3.73672	1.38622	-1.78718	-0.837689	0.69886	2314	Cre08.g383750.t1.1/Cre08.g383750.t2.1	NA	NA									FALSE	FALSE		Cre11.g467631	Cre01.g050900
Cre07.g347600	1.82406	0.579969	4.28031	2.16603	-1.7871	-0.837618	0.69723	2310	Cre07.g347600.t1.1/Cre07.g347600.t2.1	NA	PTHR11059 - DNA REPAIR PROTEIN RECN (1 of 1)									FALSE	TRUE		Cre12.g536000	Cre17.g706200
Cre09.g416250	2.85257	1.15014	6.58147	3.4073	-1.78661	-0.837225	0.700694	2323	Cre09.g416250.t1.1	NA	K10357 - myosin V (MYO5) (1 of 3)									FALSE	FALSE		Cre13.g569000	Cre12.g552850
Cre17.g718468	4.79878	0.197561	10.2484	0.698932	-1.78623	-0.83692	0.76088	2493	Cre17.g718468.t1.2	NA	3.4.24.38 - Gametolysin / Lysin (1 of 37)									FALSE	TRUE		Cre03.g167351	Cre13.g572401
Cre10.g428300	2.84985	0.922218	5.92378	0.922209	-1.78619	-0.836883	0.719786	2355	Cre10.g428300.t1.1	NA	NA									FALSE	FALSE		Cre12.g514100	Cre06.g301500
Cre16.g687406	0.431893	0.102268	0.935246	0.199971	-1.78593	-0.836677	0.675509	2260	Cre16.g687406.t1.1/Cre16.g687406.t2.1/Cre16.g687406.t3.1	NA	NA									TRUE	FALSE		Cre03.g207900	Cre06.g286100
Cre17.g724850	6.602	3.98961	14.0943	5.69404	-1.78588	-0.836637	0.652527	2205	Cre17.g724850.t1.2	NA	K14848 - ribosome assembly protein RRB1 (RRB1, GRWD1) (1 of 1)									FALSE	FALSE		Cre16.g669550	Cre11.g479383
Cre17.g717250	0.377733	0.0410849	0.843385	0.249451	-1.78587	-0.836624	0.649486	2199	Cre17.g717250.t1.1	NA	NA									FALSE	FALSE		Cre16.g689650	Cre13.g602600
Cre06.g284900	21.1473	5.11892	46.5056	14.1639	-1.78569	-0.836478	0.811621	2697	Cre06.g284900.t1.2/Cre06.g284900.t2.1	NA	Peptidyl-prolyl cis-trans isomerase, cyclophilin-type									FALSE	FALSE		Cre17.g715400	Cre02.g098150
Cre09.g406600	11.6509	1.67282	26.1816	9.61973	-1.78532	-0.836186	0.736011	2420	Cre09.g406600.t1.1	NA	NA									FALSE	FALSE		Cre17.g741050	Cre12.g501700
Cre17.g726000	6.46669	2.39757	13.1988	1.50751	-1.7853	-0.836165	0.77278	2579	Cre17.g726000.t1.2	NA	2.7.7.72 - CCA tRNA nucleotidyltransferase / tRNA-nucleotidyltransferase (1 of 3)									FALSE	FALSE		Cre16.g650950	Cre11.g467670
Cre02.g087700	3.58672	0.850693	7.82932	2.93344	-1.78528	-0.836149	0.703653	2331	Cre02.g087700.t1.2	APX1	Ascorbate peroxidase									FALSE	FALSE		Cre01.g049650	Cre01.g042450
Cre12.g539201	0.834165	0.648739	1.40856	0.43146	-1.78521	-0.836091	0.602054	2072	Cre12.g539201.t1.1/Cre12.g539201.t2.1	NA	NA									FALSE	FALSE		Cre10.g417750	Cre02.g100100
Cre14.g619000	4.45711	0.799873	9.67283	2.29426	-1.78474	-0.835713	0.81937	2728	Cre14.g619000.t1.2	NA	NA									TRUE	FALSE		Cre02.g074700	Cre09.g415700
Cre14.g616700	10.7598	2.42338	24.2703	10.3856	-1.78425	-0.835314	0.775442	2589	Cre14.g616700.t1.1	NA	NA									TRUE	FALSE		Cre12.g499204	Cre06.g300100
Cre13.g568450	0.937033	0.353532	1.95332	0.295905	-1.78413	-0.835223	0.741963	2446	Cre13.g568450.t1.1	NA	PTHR24115:SF535 - KINESIN-RELATED PROTEIN 4 (1 of 1)									FALSE	FALSE		Cre06.g287250	Cre14.g609850
Cre01.g003550	3.32478	0.399641	7.4028	1.93915	-1.78402	-0.835132	0.735209	2421	Cre01.g003550.t1.1	NA	PTHR12231:SF112 - RHODANESE-LIKE DOMAIN-CONTAINING PROTEIN 14, CHLOROPLASTIC (1 of 2)									FALSE	TRUE		Cre03.g149700	Cre06.g309450
Cre16.g684149	0.0487839	0.0483464	0.112193	0.0598013	-1.78399	-0.83511	0.611146	2100	Cre16.g684149.t1.1	NA	NA									TRUE	FALSE		Cre16.g691600	Cre04.g224550
Cre13.g562475	7.00723	2.30495	16.0491	7.57077	-1.78382	-0.834969	0.759008	2491	Cre13.g562475.t1.1	NA	PTHR10585:SF10 - ER LUMEN PROTEIN RETAINING RECEPTOR FAMILY PROTEIN-RELATED (1 of 1)									FALSE	FALSE		Cre16.g657600	Cre05.g237000
Cre19.g750097	1.78705	0.616	4.02583	1.2651	-1.78353	-0.834737	0.645044	2196	Cre19.g750097.t1.1	NA	NA									FALSE	TRUE		Cre17.g718850	Cre03.g192050
Cre02.g117350	0.437864	0.276717	0.842873	0.0558187	-1.7833	-0.834546	0.634888	2176	Cre02.g117350.t1.1	NA	Tubulin tyrosine ligase									FALSE	FALSE		Cre01.g048550	Cre07.g324150
Cre03.g180850	5.86217	2.43248	12.7825	4.56747	-1.78302	-0.834321	0.793814	2648	Cre03.g180850.t1.2	SEC23A	COP-II coat subunit									TRUE	FALSE		Cre03.g168150	Cre07.g328750
Cre03.g190250	1.07581	0.341047	2.27479	0.669935	-1.78253	-0.833927	0.70855	2339	Cre03.g190250.t1.2	NA	PTHR10795:SF157 - MEMBRANE-BOUND TRANSCRIPTION FACTOR PEPTIDASE, SITE 1 (1 of 5)									FALSE	FALSE		Cre03.g204250	Cre01.g047500
Cre03.g206351	0.0721914	0.0322237	0.156969	0.0717913	-1.7825	-0.833904	0.648159	2204	Cre03.g206351.t1.1	NA	NA									FALSE	FALSE		Cre02.g076800	Cre17.g747897
Cre06.g255600	0.0602117	0.10429	0.109969	0.0502602	-1.78178	-0.833321	0.597465	2070	Cre06.g255600.t1.1	NA	EZY1-like protein									FALSE	FALSE		Cre01.g054150	Cre03.g183400
Cre01.g012550	0.0729314	0.0304437	0.215292	0.154378	-1.78097	-0.832661	0.611251	2107	Cre01.g012550.t1.1	NA	NA									FALSE	FALSE		Cre06.g282200	Cre09.g392060
Cre02.g095650	4.91979	1.65549	10.242	0.441361	-1.78042	-0.83222	0.785411	2623	Cre02.g095650.t1.1	NA	1.14.13.114 - 6-hydroxynicotinate 3-monooxygenase / HNA-3-monooxygenase (1 of 5)									FALSE	TRUE		Cre10.g457801	Cre15.g636075
Cre08.g361000	1.78769	0.731016	3.72971	0.784101	-1.77997	-0.831856	0.720183	2366	Cre08.g361000.t1.1/Cre08.g361000.t2.1	NA	PTHR31187:SF0 - TLC ATP/ADP TRANSPORTER (1 of 1)									FALSE	FALSE		Cre10.g423350	Cre09.g396772
Cre16.g694703	0.620023	0.323582	1.65466	1.28475	-1.77982	-0.831729	0.606578	2096	Cre16.g694703.t1.1	NA	PTHR12383:SF5 - PEPTIDASE-S24/S26 DOMAIN-CONTAINING PROTEIN (1 of 1)									FALSE	FALSE		Cre17.g718350	Cre01.g050316
Cre11.g467579	0.131216	0.0334803	0.321746	0.146194	-1.77975	-0.831678	0.599741	2078	Cre11.g467579.t1.1	NA	NA									FALSE	FALSE		Cre03.g166800	Cre13.g571300
Cre17.g725100	2.48434	0.646981	5.74949	2.82779	-1.77943	-0.831413	0.727782	2404	Cre17.g725100.t1.2	NA	K03165 - DNA topoisomerase III (TOP3) (1 of 1)									FALSE	FALSE		Cre10.g438100	Cre16.g652250
Cre07.g346450	1.81195	0.345606	3.86399	1.01553	-1.77927	-0.831288	0.672884	2270	Cre07.g346450.t1.1	NA	PTHR11780//PTHR11780:SF12 - NADH-UBIQUINONE OXIDOREDUCTASE FLAVOPROTEIN 1 NDUFV1 // SUBFAMILY NOT NAMED (1 of 1)									FALSE	FALSE		Cre02.g087350	Cre11.g469500
Cre12.g546877	0.445222	0.277438	1.28845	1.23104	-1.77899	-0.831055	0.623118	2157	Cre12.g546877.t1.1/Cre12.g546877.t2.1	NA	NA									TRUE	FALSE		Cre07.g354500	Cre11.g475700
Cre03.g201332	1.92885	0.622298	4.08923	1.02457	-1.77818	-0.830405	0.710108	2354	Cre03.g201332.t1.2	NA	2.1.1.259 - [Fructose-bisphosphate aldolase]-lysine N-methyltransferase / (dimerizing)]-lysine 6-N-methyltransferase (1 of 8)									FALSE	TRUE		Cre04.g218600	Cre26.g756547
Cre01.g032600	14.0177	4.44491	29.9873	8.63497	-1.77793	-0.830201	0.847991	2868	Cre01.g032600.t1.1	CGL25	Hypothetical protein									TRUE	FALSE		Cre07.g357800	Cre03.g144424
Cre12.g502050	4.03956	2.98643	7.66702	3.2834	-1.77762	-0.829948	0.669536	2262	Cre12.g502050.t1.2	NA	NA									TRUE	FALSE		Cre10.g454850	Cre10.g431050
Cre17.g714750	0.156065	0.180354	0.320722	0.124296	-1.7776	-0.829933	0.612595	2121	Cre17.g714750.t1.2	NA	NA									FALSE	FALSE		Cre03.g193400	Cre02.g109800
Cre01.g051482	0.0555128	0.096151	0.2071	0.179729	-1.77724	-0.829636	0.599466	2085	Cre01.g051482.t1.1	NA	NA									FALSE	FALSE		Cre17.g725301	Cre05.g231000
Cre11.g480300	0.90596	0.267047	2.09526	1.04992	-1.77724	-0.829635	0.663652	2243	Cre11.g480300.t1.1	NA	PTHR18937 - STRUCTURAL MAINTENANCE OF CHROMOSOMES SMC FAMILY MEMBER (1 of 36)									FALSE	FALSE		Cre01.g045600	Cre16.g685750
Cre16.g673169	1.4929	0.475432	3.11418	0.914408	-1.77596	-0.828603	0.676446	2286	Cre16.g673169.t1.1	NA	PF03942 - DTW domain (DTW) (1 of 3)									FALSE	FALSE		Cre10.g435350	Cre17.g717900
Cre09.g408350	1.72078	0.0974076	5.02332	4.44255	-1.77562	-0.82832	0.620892	2155	Cre09.g408350.t1.2	NA	3.4.21.72 - IgA-specific serine endopeptidase / Immunoglobulin A1 protease (1 of 9)									FALSE	FALSE		Cre02.g078100	Cre17.g702800
Cre08.g364751	0.039323	0.0245142	0.118374	0.126166	-1.77544	-0.828178	0.604749	2108	Cre08.g364751.t1.1	NA	KOG2992 - Nucleolar GTPase/ATPase p130 (1 of 3)									FALSE	FALSE		Cre11.g467555	Cre03.g206450
Cre07.g348750	0.943212	0.115971	2.27502	1.16824	-1.77432	-0.827265	0.688269	2316	Cre07.g348750.t1.1	NA	PTHR10794:SF58 - CAAX AMINO TERMINAL PROTEASE FAMILY PROTEIN (1 of 2)									FALSE	TRUE		Cre09.g387801	Cre10.g444650
Cre13.g561850	2.21548	0.410779	4.81079	1.50234	-1.77406	-0.827057	0.725261	2406	Cre13.g561850.t1.1	NA	2.7.1.4 - Fructokinase / D-fructokinase (1 of 1)									FALSE	TRUE		Cre10.g452150	Cre02.g119350
Cre08.g382200	0.152215	0.016556	0.428589	0.325799	-1.77401	-0.827016	0.602066	2102	Cre08.g382200.t1.1/Cre08.g382200.t2.1	NA	PTHR11584//PTHR11584:SF377 - SERINE/THREONINE PROTEIN KINASE // SUBFAMILY NOT NAMED (1 of 4)									FALSE	FALSE		Cre09.g396500	Cre18.g749047
Cre02.g141166	0.0163209	0.0282686	0.0510732	0.0463139	-1.77365	-0.826718	0.60089	2099	Cre02.g141166.t1.1	NA	NA									FALSE	FALSE		Cre10.g447350	Cre13.g569600
Cre03.g177800	0.0427543	0.0740526	0.133792	0.121324	-1.77365	-0.826718	0.612809	2126	Cre03.g177800.t1.1	NA	PTHR31867:SF1 - EXPANSIN-A1-RELATED (1 of 11)									FALSE	FALSE		Cre17.g696626	Cre01.g015200
Cre06.g295950	0.444382	0.0304378	0.952242	0.170448	-1.77354	-0.82663	0.740443	2458	Cre06.g295950.t1.1	NA	NA									FALSE	TRUE		Cre12.g559704	Cre02.g096400
Cre07.g347500	2.18579	1.07955	4.6976	1.8898	-1.77301	-0.826205	0.684773	2302	Cre07.g347500.t1.1	NA	PTHR21228 - FAST LEU-RICH DOMAIN-CONTAINING (1 of 85)									FALSE	FALSE		Cre06.g262500	Cre10.g456950
Cre07.g325737	1.73357	0.557745	3.61581	0.638063	-1.77266	-0.825919	0.770221	2586	Cre07.g325737.t1.1	NA	NA									FALSE	FALSE		Cre01.g035650	Cre13.g572450
Cre10.g450500	14.4662	5.93783	32.9843	19.9356	-1.77262	-0.825883	0.743225	2466	Cre10.g450500.t1.1	NA	PTHR15048:SF0 - PROTEIN FAM47E-STBD1-RELATED (1 of 8)									FALSE	TRUE		Cre06.g302800	Cre16.g684715
Cre02.g083273	0.0649346	0.057251	0.129563	0.0806156	-1.77248	-0.82577	0.603502	2111	Cre02.g083273.t1.2	NA	NA									FALSE	FALSE		Cre05.g241851	Cre02.g096200
Cre09.g386745	0.297904	0.264406	0.579706	0.507466	-1.77137	-0.82487	0.602204	2110	Cre09.g386745.t1.1	NA	NA									FALSE	FALSE		Cre07.g336250	Cre12.g540700
Cre01.g027850	4.30103	0.464459	9.82196	3.03351	-1.76934	-0.823213	0.737132	2453	Cre01.g027850.t1.1	NA	PTHR13194//PTHR13194:SF7 - COMPLEX I INTERMEDIATE-ASSOCIATED PROTEIN 30 // SUBFAMILY NOT NAMED (1 of 1)									FALSE	FALSE		Cre15.g638551	Cre02.g082500
Cre16.g675250	0.243021	0.294441	0.357088	0.100634	-1.76883	-0.822794	0.615278	2151	Cre16.g675250.t1.1	NA	2.3.1.181 - Lipoyl(octanoyl) transferase / Octanoyl-[acyl-carrier-protein]-protein N-octanoyltransferase (1 of 2)									FALSE	TRUE		Cre17.g727400	Cre03.g162500
Cre16.g674065	5.07741	3.96126	10.1848	3.84774	-1.76866	-0.822656	0.697428	2337	Cre16.g674065.t1.1	NA	K08850 - aurora kinase, other [EC:2.7.11.1] (AURKX) (1 of 19)									FALSE	FALSE		Cre08.g358558	Cre17.g746147
Cre12.g556250	3.17317	2.40487	7.25429	5.0588	-1.76851	-0.822532	0.683675	2311	Cre12.g556250.t1.2	2001-09-01	Septin-like protein									FALSE	FALSE		Cre12.g492950	Cre02.g143600
Cre12.g493050	4.12353	1.15491	8.77007	1.46562	-1.76834	-0.822399	0.762351	2552	Cre12.g493050.t1.2	NA	PF00520 - Ion transport protein (Ion_trans) (1 of 45)									FALSE	TRUE		Cre12.g526700	Cre09.g397050
Cre02.g098150	1.52906	0.592241	3.04667	0.258949	-1.76745	-0.821666	0.661878	2254	Cre02.g098150.t1.2	NA	2.7.1.17 - Xylulokinase / Xylulose kinase (1 of 1)									FALSE	TRUE		Cre06.g278202	Cre17.g744297
Cre12.g547450	2.00096	0.738901	4.26518	1.15949	-1.76723	-0.82149	0.760949	2536	Cre12.g547450.t1.2	VPS9	Guanine nucleotide exchange factor, vacuolar									FALSE	TRUE		Cre09.g389689	Cre03.g179860
Cre10.g427550	3.16048	1.79233	6.50903	1.30962	-1.76683	-0.821164	0.714529	2380	Cre10.g427550.t1.1	NA	PF11051 - Mannosyltransferase putative (Mannosyl_trans3) (1 of 4)									FALSE	FALSE		Cre17.g722583	Cre16.g686300
Cre09.g406200	4.40105	0.783916	9.52151	1.84966	-1.76644	-0.820843	0.74734	2482	Cre09.g406200.t1.2	NA	Prolyl-tRNA synthetase									FALSE	TRUE		Cre03.g197050	Cre02.g089650
Cre09.g389450	3.38578	0.869723	7.15244	1.71529	-1.76595	-0.820448	0.825199	2778	Cre09.g389450.t1.2	NA	PF00076//PF04564 - RNA recognition motif. (a.k.a. RRM, RBD, or RNP domain) (RRM_1) // U-box domain (U-box) (1 of 2)									FALSE	FALSE		Cre12.g537200	Cre11.g467779
Cre10.g444150	11.8573	1.82675	25.8229	6.23458	-1.7659	-0.820404	0.836888	2831	Cre10.g444150.t1.1	NA	PTHR14143 - INTERFERON-INDUCIBLE GTPASE 5 (1 of 2)									FALSE	FALSE		Cre01.g021450	Cre12.g535750
Cre17.g733174	0.285592	0.247398	1.23002	1.26134	-1.76518	-0.819818	0.60533	2127	Cre17.g733174.t1.1	NA	PF10013 - Uncharacterized protein conserved in bacteria (DUF2256) (DUF2256) (1 of 2)									FALSE	FALSE		Cre06.g288000	Cre05.g243800
Cre12.g553550	2.30528	1.15858	4.72416	2.21078	-1.76509	-0.819738	0.68978	2332	Cre12.g553550.t1.2	NA	NA									FALSE	FALSE		Cre12.g523700	Cre03.g212753
Cre09.g391356	0.721481	0.0564764	1.67148	0.788668	-1.76498	-0.819653	0.71074	2378	Cre09.g391356.t1.1/Cre09.g391356.t2.1	NA	2.7.11.25 - Mitogen-activated protein kinase kinase kinase / MLTK (1 of 105)									FALSE	TRUE		Cre16.g673729	Cre09.g402800
Cre11.g479700	2.55425	1.13058	5.29631	1.21649	-1.76402	-0.818866	0.713067	2383	Cre11.g479700.t1.2	NA	KOG3381 - Uncharacterized conserved protein (1 of 1)									TRUE	FALSE		Cre16.g683350	Cre01.g000450
Cre07.g347150	4.58254	2.37647	10.2184	5.22131	-1.76375	-0.818644	0.725114	2423	Cre07.g347150.t1.2	NA	NA									FALSE	FALSE		Cre02.g078831	Cre12.g497350
Cre03.g156500	8.57642	1.63186	17.5785	2.48788	-1.76346	-0.818408	0.723501	2417	Cre03.g156500.t1.1/Cre03.g156500.t2.1	NA	NA									TRUE	FALSE		Cre12.g528450	Cre14.g630400
Cre02.g098350	1.5831	0.0849078	3.33796	0.849515	-1.763	-0.81803	0.751935	2500	Cre02.g098350.t1.1	NA	PTHR11709//PTHR11709:SF118 - MULTI-COPPER OXIDASE // SUBFAMILY NOT NAMED (1 of 1)									FALSE	TRUE		Cre12.g502050	Cre16.g660050
Cre10.g463850	2.20103	0.738247	4.66424	1.42563	-1.76241	-0.817551	0.726998	2436	Cre10.g463850.t1.2	NA	NA									FALSE	FALSE		Cre03.g207825	Cre06.g286300
Cre03.g151351	0.09205	0.159435	0.1879	0.0728208	-1.76224	-0.817411	0.607445	2138	Cre03.g151351.t1.1	NA	NA									FALSE	FALSE		Cre11.g478800	Cre02.g082400
Cre17.g699900	0.12038	0.043072	0.333989	0.203476	-1.76166	-0.816932	0.630588	2198	Cre17.g699900.t1.2	NA	PTHR11732:SF255 - ARYL-ALCOHOL DEHYDROGENASE YPL088W-RELATED (1 of 2)									FALSE	FALSE		Cre03.g173600	Cre05.g241751
Cre03.g189550	5.58411	1.81477	11.6942	2.02551	-1.76106	-0.816444	0.781752	2641	Cre03.g189550.t1.1	ZIP3	Zinc/iron transporter									FALSE	TRUE		Cre07.g323200	Cre03.g205550
Cre13.g583700	0.899505	0.18841	1.95013	0.535002	-1.76082	-0.816249	0.760587	2555	Cre13.g583700.t1.1	NA	NA									FALSE	FALSE		Cre03.g194250	Cre12.g559400
Cre16.g653650	5.65401	1.59362	11.9566	3.49647	-1.76059	-0.816061	0.66072	2266	Cre16.g653650.t1.1	NA	NA									TRUE	FALSE		Cre16.g686900	Cre36.g759597
Cre13.g579100	0.936759	0.245557	2.02098	0.75029	-1.76051	-0.815993	0.760211	2551	Cre13.g579100.t1.1	NA	Anaphase promoting complex subunit 1 (partial)									FALSE	TRUE		Cre16.g674938	Cre08.g379650
Cre10.g426550	0.112025	0.0475107	0.374633	0.386831	-1.76048	-0.815968	0.627805	2197	Cre10.g426550.t1.2	NA	PTHR11220:SF1 - HEME-BINDING PROTEIN 1 (1 of 3)									TRUE	FALSE		Cre04.g229650	Cre04.g217917
Cre01.g001983	4.8221	0.342958	10.8284	4.30088	-1.75996	-0.815546	0.634939	2215	Cre01.g001983.t1.1/Cre01.g001983.t2.1	NA	NA									TRUE	FALSE		Cre12.g504150	Cre11.g467740
Cre06.g252800	3.79163	0.910871	8.28554	2.8577	-1.75986	-0.815463	0.816059	2753	Cre06.g252800.t1.1	NA	PTHR21493//PTHR21493:SF141 - CGI-141-RELATED/LIPASE CONTAINING PROTEIN // SUBFAMILY NOT NAMED (1 of 1)									FALSE	FALSE		Cre07.g322100	Cre10.g466400
Cre09.g412400	1.18251	0.342477	3.03207	2.06116	-1.75891	-0.814683	0.661168	2273	Cre09.g412400.t1.1	NA	NA									FALSE	FALSE		Cre04.g229250	Cre01.g006800
Cre11.g483351	1.99193	0.20888	5.18627	3.71521	-1.75891	-0.814679	0.683563	2329	Cre11.g483351.t1.1	NA	PF12499 - Pherophorin (DUF3707) (1 of 70)									FALSE	TRUE		Cre12.g494100	Cre12.g517000
Cre13.g566400	0.430668	0.228298	0.863056	0.190104	-1.75869	-0.814505	0.668754	2293	Cre13.g566400.t1.2	NA	PTHR21228//PTHR21228:SF20 - FAST LEU-RICH DOMAIN-CONTAINING // SUBFAMILY NOT NAMED (1 of 10)									TRUE	FALSE		Cre10.g453300	Cre12.g527450
Cre03.g151400	2.88429	0.816459	6.33468	2.19542	-1.75857	-0.814402	0.872918	3030	Cre03.g151400.t1.1	NA	K05643 - ATP-binding cassette, subfamily A (ABC1), member 3 (ABCA3) (1 of 1)									TRUE	FALSE		Cre07.g325724	Cre06.g302350
Cre03.g170001	0.214511	0.133727	0.542983	0.439589	-1.75793	-0.813874	0.614617	2171	Cre03.g170001.t1.1	NA	NA									FALSE	FALSE		Cre07.g340700	Cre06.g304350
Cre16.g681750	0.310541	0.0742788	0.645758	0.129989	-1.75742	-0.813459	0.701956	2373	Cre16.g681750.t1.1/Cre16.g681750.t2.1	NA	K01537 - Ca2+-transporting ATPase (E3.6.3.8) (1 of 5)									FALSE	FALSE		Cre18.g748747	Cre07.g337700
Cre01.g028950	2.4992	0.315119	5.63889	2.16736	-1.75741	-0.813452	0.674489	2313	Cre01.g028950.t1.2	NA	2.8.1.1 - Thiosulfate sulfurtransferase / Thiosulfate thiotransferase (1 of 7)									FALSE	TRUE		Cre02.g105750	Cre09.g394954
Cre13.g606550	0.862278	0.380541	1.78262	0.0941436	-1.75718	-0.813263	0.653714	2259	Cre13.g606550.t1.1	NA	NA									FALSE	FALSE		Cre10.g419800	Cre17.g722450
Cre03.g156550	1.39195	0.138669	3.15064	1.2053	-1.75706	-0.813163	0.776004	2631	Cre03.g156550.t1.1	NA	PTHR22829 - DEP DOMAIN PROTEIN (1 of 1)									TRUE	FALSE		Cre06.g258733	Cre16.g667950
Cre05.g236878	1.03337	0.170986	2.24327	0.534605	-1.75675	-0.812905	0.761441	2571	Cre05.g236878.t1.1	NA	PF00583 - Acetyltransferase (GNAT) family (Acetyltransf_1) (1 of 35)									FALSE	TRUE		Cre03.g145407	Cre16.g668100
Cre10.g460300	0.586638	0.353902	1.22004	0.30976	-1.75672	-0.812881	0.668225	2295	Cre10.g460300.t1.2	PGM2	Phosphoglycerate mutase									TRUE	FALSE		Cre09.g390726	Cre16.g657250
Cre06.g266900	0.416111	0.219825	0.913501	0.380624	-1.75621	-0.812461	0.679684	2325	Cre06.g266900.t1.1	NA	PF11998 - Protein of unknown function (DUF3493) (DUF3493) (1 of 2)									FALSE	FALSE		Cre06.g278101	Cre17.g701300
Cre10.g421700	12.6894	5.54244	29.4691	18.7497	-1.75556	-0.811929	0.772128	2615	Cre10.g421700.t1.2	GPD4	Glycerol-3-phosphate dehydrogenase/dihydroxyacetone-3-phosphate reductase									FALSE	TRUE		Cre06.g288150	Cre12.g488600
Cre17.g724800	0.640304	0.233022	1.47887	0.682461	-1.75552	-0.811898	0.66998	2301	Cre17.g724800.t1.1	NA	NA									FALSE	FALSE		Cre17.g742050	Cre17.g727801
Cre12.g524050	0.338208	0.123843	0.710958	0.146076	-1.75541	-0.811812	0.669328	2300	Cre12.g524050.t1.1	NA	NA									TRUE	FALSE		Cre10.g419550	Cre01.g037350
Cre17.g746847	2.58088	0.318462	5.35319	0.969815	-1.75539	-0.811792	0.718317	2419	Cre17.g746847.t1.1	NA	NA									FALSE	TRUE		Cre14.g615700	Cre02.g143550
Cre14.g632847	1.26831	0.222538	2.78244	1.26983	-1.75528	-0.811702	0.711947	2409	Cre14.g632847.t1.1	NA	PF03016//PF07974 - Exostosin family (Exostosin) // EGF-like domain (EGF_2) (1 of 3)									FALSE	FALSE		Cre09.g412787	Cre15.g638651
Cre10.g431250	0.108064	0.046679	0.224136	0.0434607	-1.75498	-0.811457	0.652391	2263	Cre10.g431250.t1.1	CYG5	Adenylate/guanylate cyclase									FALSE	FALSE		Cre16.g689150	Cre17.g732250
Cre07.g316526	0.465082	0.380991	0.821764	0.345987	-1.75496	-0.811441	0.632896	2225	Cre07.g316526.t1.2	NA	PTHR11005 - LYSOSOMAL ACID LIPASE-RELATED (1 of 6)									FALSE	TRUE		Cre09.g413075	Cre02.g105400
Cre06.g258583	0.17753	0.145448	0.389348	0.237775	-1.75491	-0.8114	0.623667	2207	Cre06.g258583.t1.2	NA	NA									FALSE	FALSE		Cre06.g250100	Cre10.g466100
Cre03.g153900	0.276384	0.0343832	0.71919	0.436653	-1.75479	-0.811296	0.65307	2269	Cre03.g153900.t1.2	NA	1.14.13.9 - Kynurenine 3-monooxygenase / Kynurenine 3-hydroxylase (1 of 5)									FALSE	TRUE		Cre08.g368400	Cre09.g397845
Cre07.g342900	0.349157	0.143953	0.719094	0.108692	-1.75477	-0.811279	0.655933	2277	Cre07.g342900.t1.1	NA	2.7.1.100 - S-methyl-5-thioribose kinase / MTR kinase (1 of 2)									FALSE	FALSE		Cre07.g321200	Cre09.g417400
Cre12.g497700	1.89362	0.481883	4.49386	2.47621	-1.75383	-0.810513	0.697295	2368	Cre12.g497700.t1.2	NA	PTHR10366:SF411 - HIGH CHLOROPHYLL FLUORESCENCE PHENOTYPE 173 PROTEIN (1 of 7)									FALSE	FALSE		Cre10.g449250	Cre01.g033200
Cre07.g325733	2.04199	0.976878	4.41187	1.95196	-1.75372	-0.810422	0.716616	2425	Cre07.g325733.t1.1	NA	NA									FALSE	TRUE		Cre06.g261600	Cre03.g150200
Cre17.g725750	6.75684	0.457359	14.6162	4.65006	-1.75221	-0.809177	0.871929	3037	Cre17.g725750.t1.2	NA	K11089 - 60 kDa SS-A/Ro ribonucleoprotein (TROVE2, SSA2) (1 of 3)									TRUE	FALSE		Cre14.g633626	Cre03.g197700
Cre06.g296500	1.56309	0.972392	3.39716	1.89821	-1.75175	-0.808793	0.685446	2345	Cre06.g296500.t1.2	NA	PF01753//PF07719 - MYND finger (zf-MYND) // Tetratricopeptide repeat (TPR_2) (1 of 1)									FALSE	TRUE		Cre16.g669800	Cre03.g184651
Cre04.g229776	0.0673927	0.05838	0.232067	0.259466	-1.75107	-0.808237	0.615013	2181	Cre04.g229776.t1.1	NA	NA									FALSE	FALSE		Cre09.g414250	Cre10.g467100
Cre06.g278195	5.07773	1.61394	10.8307	2.60414	-1.75067	-0.80791	0.718513	2433	Cre06.g278195.t1.1	NA	NA									FALSE	TRUE		Cre11.g468200	Cre01.g055477
Cre03.g163200	0.795856	0.18986	1.77648	0.721843	-1.75062	-0.807865	0.649557	2271	Cre03.g163200.t1.1	NA	K15683 - NF-X1-type zinc finger protein NFXL1 (NFXL1, OZFP) (1 of 1)									FALSE	FALSE		Cre06.g292950	Cre09.g387726
Cre03.g201700	0.0344965	0.0304146	0.0785378	0.0171331	-1.75056	-0.807815	0.613731	2177	Cre03.g201700.t1.1	NA	PF15072 - Domain of unknown function (DUF4539) (DUF4539) (1 of 1)									FALSE	FALSE		Cre17.g705600	Cre03.g196150
Cre03.g197100	38.2931	23.5867	79.2065	42.0242	-1.75017	-0.807499	0.69544	2371	Cre03.g197100.t1.2	NA	PTHR10641:SF585 - MYB DNA-BINDING-LIKE PROTEIN (1 of 2)									FALSE	TRUE		Cre09.g399650	Cre06.g306800
Cre11.g467572	4.03746	1.73752	8.53338	2.67265	-1.74896	-0.806494	0.732657	2472	Cre11.g467572.t1.1/Cre11.g467572.t2.1	NA	NA									TRUE	FALSE		Cre19.g750847	Cre12.g537550
Cre12.g550900	1.04999	0.270472	2.23411	0.705987	-1.74812	-0.805805	0.752858	2548	Cre12.g550900.t1.2	SSD3	Sterol sensing domain protein									FALSE	FALSE		Cre17.g721000	Cre08.g373100
Cre09.g406700	0.56517	0.129817	1.28426	0.499574	-1.74795	-0.805666	0.694404	2372	Cre09.g406700.t1.1	NA	PTHR10795//PTHR10795:SF371 - PROPROTEIN CONVERTASE SUBTILISIN/KEXIN // SUBFAMILY NOT NAMED (1 of 2)									FALSE	FALSE		Cre16.g684150	Cre02.g077500
Cre13.g575000	1.27555	0.302921	2.83947	1.02735	-1.74774	-0.805495	0.644444	2257	Cre13.g575000.t1.1	CCS1	Protein required for cytochrome c synthesis/biogenesis									FALSE	TRUE		Cre11.g467574	Cre01.g021251
Cre16.g677000	27.7928	12.5057	57.1725	18.678	-1.74763	-0.805401	0.729196	2463	Cre16.g677000.t1.2	HSP70E	Heat shock protein 70E									TRUE	FALSE		Cre04.g222250	Cre02.g106950
Cre12.g531350	0.937726	0.198837	1.99716	0.428785	-1.74709	-0.804958	0.695143	2377	Cre12.g531350.t1.1	CGL62	Cell cycle associated protein									FALSE	TRUE		Cre02.g081100	Cre03.g150450
Cre05.g242501	0.307723	0.194472	0.610516	0.186548	-1.74621	-0.804227	0.620202	2203	Cre05.g242501.t1.1	NA	NA									FALSE	FALSE		Cre07.g338750	Cre09.g410350
Cre12.g521100	0.361819	0.0991455	0.894841	0.412093	-1.74615	-0.804178	0.62817	2227	Cre12.g521100.t1.1	NA	NA									FALSE	FALSE		Cre07.g322376	Cre04.g230536
Cre04.g215500	0.523836	0.148066	1.07991	0.303736	-1.74601	-0.804061	0.708455	2415	Cre04.g215500.t1.2	NA	PF09735 - Membrane-associated apoptosis protein (Nckap1) (1 of 1)									FALSE	FALSE		Cre02.g075150	Cre01.g000050
Cre11.g476900	3.18079	1.42432	6.2416	1.1277	-1.74596	-0.804023	0.761753	2592	Cre11.g476900.t1.2	NA	PTHR12465 - UBIQUITIN SPECIFIC PROTEASE HOMOLOG 49 (1 of 1)									FALSE	FALSE		Cre10.g425800	Cre06.g271700
Cre10.g439900	17.4656	4.70977	36.8184	10.1531	-1.74578	-0.803871	0.780137	2657	Cre10.g439900.t1.2	HSP70G	ER-located HSP110/SSE-like protein									TRUE	FALSE		Cre01.g016750	Cre09.g392650
Cre09.g412787	1.66113	0.649094	3.33968	0.805488	-1.74444	-0.802764	0.788138	2689	Cre09.g412787.t1.1	NA	PTHR13244 - ZINC FINGER MYND DOMAIN CONTAINING PROTEIN 10 (1 of 16)									TRUE	FALSE		Cre13.g603000	Cre11.g467700
Cre16.g688800	3.24184	1.75427	6.72467	2.24928	-1.74432	-0.802669	0.672845	2328	Cre16.g688800.t1.2	NA	NA									FALSE	FALSE		Cre12.g502901	Cre04.g217910
Cre18.g748947	2.42024	0.584281	5.01144	1.28982	-1.7438	-0.802238	0.786327	2682	Cre18.g748947.t1.1	NA	K15285 - solute carrier family 35, member E3 (SLC35E3) (1 of 4)									FALSE	FALSE		Cre06.g310750	Cre12.g558300
Cre02.g104400	0.729226	0.327364	1.47647	0.345102	-1.74266	-0.801289	0.682742	2349	Cre02.g104400.t1.1	NA	PTHR23195:SF15 - YEATS DOMAIN-CONTAINING PROTEIN 4 (1 of 1)									FALSE	FALSE		Cre03.g191850	Cre03.g167600
Cre12.g509050	8.83038	2.28515	18.447	4.50525	-1.74238	-0.801059	0.841157	2898	Cre12.g509050.t1.1	PSBP3	OEE2-like protein of thylakoid lumen									FALSE	TRUE		Cre04.g217969	Cre07.g325718
Cre11.g467694	0.645974	0.138586	1.50816	0.737867	-1.74221	-0.800919	0.654299	2290	Cre11.g467694.t1.1/Cre11.g467694.t2.1	NA	NA									TRUE	FALSE		Cre12.g507200	Cre03.g144244
Cre09.g417200	13.7544	7.27337	28.9585	12.3137	-1.7422	-0.80091	0.691208	2376	Cre09.g417200.t1.2	NA	K15030 - translation initiation factor 3 subunit M (EIF3M) (1 of 1)									FALSE	FALSE		Cre01.g029650	Cre16.g691400
Cre08.g373583	1.05662	0.479655	2.48036	1.36876	-1.74088	-0.79982	0.707052	2418	Cre08.g373583.t1.1/Cre08.g373583.t2.1	NA	PTHR12428 - OXA1 (1 of 5)									FALSE	TRUE		Cre17.g741850	Cre13.g579100
Cre06.g255350	0.700159	0.387709	1.60149	0.975678	-1.74053	-0.799527	0.648006	2282	Cre06.g255350.t1.2	THI10	Hydroxyethylthiazole kinase									FALSE	TRUE		Cre10.g457850	Cre01.g016001
Cre12.g534600	4.54776	2.6004	9.65077	4.31799	-1.74049	-0.799497	0.742302	2510	Cre12.g534600.t1.2	TOM20	Translocase of outer mitochondrial membrane									FALSE	FALSE		Cre12.g510600	Cre01.g043950
Cre14.g621600	0.21128	0.119905	0.708714	0.668176	-1.74017	-0.799226	0.618684	2210	Cre14.g621600.t1.2	NA	PF15003 - HAUS augmin-like complex subunit 2 (HAUS2) (1 of 1)									FALSE	FALSE		Cre05.g234350	Cre07.g328075
Cre03.g173850	1.34841	0.0276849	2.78244	0.625036	-1.74008	-0.799158	0.707008	2424	Cre03.g173850.t1.1	NA	PTHR12298 - PCDC2 PROGRAMMED CELL DEATH PROTEIN 2 -RELATED (1 of 39)									FALSE	FALSE		Cre03.g203345	Cre05.g238100
Cre03.g162800	1.44885	1.62212	2.37829	1.01728	-1.7398	-0.798925	0.620166	2213	Cre03.g162800.t1.2	LCI1	Low-CO2-inducible membrane protein									FALSE	TRUE		Cre24.g755097	Cre03.g170200
Cre12.g560300	10.5261	6.46027	20.675	5.81262	-1.73955	-0.798711	0.812061	2772	Cre12.g560300.t1.2/Cre12.g560300.t2.1/Cre12.g560300.t3.1	NA	PTHR24012:SF318 - RNA-BINDING (RRM/RBD/RNP MOTIFS) FAMILY PROTEIN (1 of 1)									FALSE	FALSE		Cre12.g483500	Cre06.g285401
Cre05.g234643	0.394487	0.193188	0.908722	0.358111	-1.73946	-0.798639	0.644242	2274	Cre05.g234643.t1.1	NA	NA									FALSE	FALSE		Cre11.g467599	Cre09.g390801
Cre07.g339700	5.29489	2.48542	11.0582	3.70049	-1.73847	-0.797819	0.796407	2727	Cre07.g339700.t1.2	SUF3	Iron-sulfur cluster assembly protein									FALSE	FALSE		Cre12.g559850	Cre06.g278195
Cre04.g217924	1.0029	0.538681	2.09228	0.574992	-1.73781	-0.797269	0.667892	2324	Cre04.g217924.t1.1	NA	PTHR11351 - ACYL-COA DESATURASE (1 of 5)									FALSE	TRUE		Cre05.g242600	Cre16.g654300
Cre01.g053950	5.22258	0.299675	11.3198	3.10889	-1.73777	-0.79724	0.787647	2702	Cre01.g053950.t1.1	NA	PTHR13789 - MONOOXYGENASE (1 of 23)									FALSE	TRUE		Cre07.g348700	Cre10.g430501
Cre12.g559900	2.6342	0.339013	5.7749	1.37839	-1.7377	-0.797182	0.749097	2556	Cre12.g559900.t1.1	NA	NA									FALSE	FALSE		Cre13.g587150	Cre09.g411250
Cre06.g308850	18.6164	7.33725	39.6917	15.188	-1.73718	-0.796747	0.860754	2989	Cre06.g308850.t1.2	NA	K03245 - translation initiation factor 3 subunit J (EIF3J) (1 of 1)									TRUE	FALSE		Cre03.g208945	Cre03.g179600
Cre10.g420512	1.4541	0.466948	3.07864	1.0457	-1.73679	-0.796426	0.71077	2442	Cre10.g420512.t1.1/Cre10.g420512.t2.1	NA	PTHR12121 - CARBON CATABOLITE REPRESSOR PROTEIN 4 (1 of 9)									FALSE	FALSE		Cre03.g188650	Cre09.g403145
Cre13.g565750	1.577	0.256516	3.41012	1.30383	-1.73603	-0.79579	0.680831	2356	Cre13.g565750.t1.2/Cre13.g565750.t2.1	EFG4	GTP-binding elongation factor									TRUE	FALSE		Cre06.g278250	Cre02.g089450
Cre09.g408500	0.974791	0.750518	1.78757	0.0586269	-1.73568	-0.795503	0.662735	2318	Cre09.g408500.t1.1	NA	K07561 - 2-(3-amino-3-carboxypropyl)histidine synthase [EC:2.5.1.108] (dph2, DPH1) (1 of 1)									FALSE	FALSE		Cre10.g420537	Cre02.g106200
Cre07.g347850	0.594798	0.623788	1.03041	0.49359	-1.73458	-0.794587	0.618069	2218	Cre07.g347850.t1.1	NA	PTHR21451 - HISTONE H3 METHYLTRANSFERASE (1 of 1)									FALSE	FALSE		Cre14.g629102	Cre07.g343200
Cre08.g360150	0.324169	0.084501	0.766954	0.40952	-1.73458	-0.794582	0.683842	2364	Cre08.g360150.t1.1	NA	NA									FALSE	TRUE		Cre12.g554250	Cre09.g417401
Cre14.g613050	2.70165	0.624965	5.58297	1.11825	-1.73457	-0.794582	0.777325	2665	Cre14.g613050.t1.1/Cre14.g613050.t2.1	NA	NA									FALSE	TRUE		Cre09.g401301	Cre16.g659800
Cre12.g554103	0.153412	0.212531	0.370872	0.331544	-1.73432	-0.794374	0.618034	2220	Cre12.g554103.t1.1	CGL74	Predicted protein									FALSE	FALSE		Cre13.g605750	Cre10.g428900
Cre14.g625100	1.93488	1.79021	3.2856	0.290706	-1.7332	-0.79344	0.687882	2385	Cre14.g625100.t1.2	NA	NA									FALSE	FALSE		Cre07.g337650	Cre14.g616826
Cre11.g468365	0.424556	0.0712856	0.974186	0.442357	-1.73263	-0.792964	0.759094	2594	Cre11.g468365.t1.1/Cre11.g468365.t2.1	NA	NA									FALSE	TRUE		Cre12.g504900	Cre09.g389875
Cre14.g620400	7.2103	3.87398	15.7594	8.06785	-1.73186	-0.79232	0.764605	2619	Cre14.g620400.t1.2	SPC22	Signal Peptidase, 22 kDa subunit									TRUE	FALSE		Cre13.g586550	Cre10.g429750
Cre07.g329767	0.136846	0.135618	0.366295	0.375633	-1.73173	-0.792212	0.618837	2224	Cre07.g329767.t1.1	NA	NA									FALSE	FALSE		Cre07.g323100	Cre02.g113850
Cre17.g719834	0.436824	0.141965	0.888436	0.243329	-1.7306	-0.791268	0.705599	2440	Cre17.g719834.t1.1	NA	NA									FALSE	TRUE		Cre12.g500600	Cre16.g656950
Cre09.g405000	0.286774	0.0731717	0.653441	0.273542	-1.73053	-0.791213	0.690359	2402	Cre09.g405000.t1.2	NA	NA									FALSE	FALSE		Cre06.g276100	Cre01.g039850
Cre06.g288900	0.0658354	0.11403	0.257711	0.223268	-1.73052	-0.791204	0.619646	2226	Cre06.g288900.t1.1	NA	NA									FALSE	FALSE		Cre11.g478528	Cre03.g181700
Cre06.g304500	6.5358	1.86394	14.2334	5.13447	-1.72993	-0.790716	0.791049	2722	Cre06.g304500.t1.2	ZYS4	Zygote-specific protein									FALSE	FALSE		Cre14.g612900	Cre16.g689100
Cre16.g668650	0.65835	0.19712	1.36592	0.180905	-1.72991	-0.790701	0.734281	2499	Cre16.g668650.t1.1	NA	PTHR34204:SF2 - RNA-BINDING ASCH DOMAIN PROTEIN (1 of 1)									TRUE	FALSE		Cre12.g542650	Cre16.g655350
Cre16.g667700	0.927351	0.53835	2.01436	1.0338	-1.72959	-0.79043	0.72869	2485	Cre16.g667700.t1.2	NA	PF03407 - Nucleotide-diphospho-sugar transferase (Nucleotid_trans) (1 of 30)									FALSE	TRUE		Cre13.g592150	Cre08.g381400
Cre17.g712050	1.33974	0.578272	2.8866	1.26367	-1.72813	-0.789212	0.685884	2386	Cre17.g712050.t1.1	NA	PF01697 - Glycosyltransferase family 92 (Glyco_transf_92) (1 of 8)									FALSE	FALSE		Cre06.g298200	Cre08.g358400
Cre05.g241647	0.0364383	0.063113	0.127203	0.142221	-1.72777	-0.788909	0.621448	2231	Cre05.g241647.t1.1	NA	NA									FALSE	FALSE		Cre06.g275150	Cre04.g223150
Cre13.g566626	0.143075	0.247814	0.499462	0.558431	-1.72777	-0.788909	0.632348	2267	Cre13.g566626.t1.1	NA	NA									FALSE	FALSE		Cre05.g245550	Cre01.g016900
Cre03.g187300	0.672418	0.196792	1.49123	0.71642	-1.72731	-0.788525	0.679163	2361	Cre03.g187300.t1.1	NA	2.7.11.22 - Cyclin-dependent kinase / Cdk-activating protein kinase (1 of 53)									TRUE	FALSE		Cre07.g329650	Cre07.g342600
Cre14.g609010	0.554924	0.195984	1.2581	0.513949	-1.72694	-0.788221	0.671762	2352	Cre14.g609010.t1.1	NA	NA									FALSE	FALSE		Cre04.g224947	Cre16.g689001
Cre07.g343050	5.16933	0.628927	12.4799	7.71933	-1.72691	-0.78819	0.681044	2374	Cre07.g343050.t1.2	NA	NA									FALSE	FALSE		Cre12.g511950	Cre05.g236600
Cre01.g050800	0.279229	0.139321	0.662883	0.408228	-1.72687	-0.788156	0.683306	2379	Cre01.g050800.t1.1	NA	NA									FALSE	FALSE		Cre03.g191100	Cre12.g553600
Cre17.g719050	0.965254	0.710608	2.15908	1.70241	-1.72686	-0.78815	0.630869	2264	Cre17.g719050.t1.1	NA	NA									FALSE	FALSE		Cre14.g628800	Cre03.g154000
Cre06.g293516	1.24137	0.393949	2.48018	0.719543	-1.72669	-0.788012	0.684586	2384	Cre06.g293516.t1.1	NA	PTHR22939:SF83 - PROTEASE DO-LIKE 2, CHLOROPLASTIC (1 of 4)									FALSE	TRUE		Cre13.g589350	Cre02.g095150
Cre01.g032200	0.25126	0.184594	0.46475	0.0951492	-1.72648	-0.787834	0.73103	2495	Cre01.g032200.t1.2	NA	Similar to Flagellar Associated Protein FAP187									TRUE	FALSE		Cre07.g339050	Cre17.g734300
Cre02.g114850	2.29319	1.87379	4.28122	1.72136	-1.72519	-0.786755	0.70884	2454	Cre02.g114850.t1.2	NA	PTHR22904:SF169 - RNA POLYMERASE II-ASSOCIATED PROTEIN 3 (1 of 1)									TRUE	FALSE		Cre06.g281300	Cre18.g749397
Cre02.g144251	3.1618	1.05912	6.52227	1.93111	-1.72493	-0.786537	0.708972	2456	Cre02.g144251.t1.1	NA	NA									FALSE	FALSE		Cre04.g226811	Cre10.g452100
Cre01.g031951	0.391725	0.217855	0.693751	0.156437	-1.72445	-0.786139	0.681438	2381	Cre01.g031951.t1.1	NA	NA									FALSE	FALSE		Cre10.g465575	Cre16.g669126
Cre16.g692650	1.27626	0.8337	2.39603	0.917343	-1.72376	-0.78556	0.689372	2413	Cre16.g692650.t1.2	CGL4	Predicted protein									FALSE	FALSE		Cre03.g182050	Cre05.g234645
Cre02.g144300	1.43919	0.471015	3.20958	1.48793	-1.72346	-0.785308	0.724218	2483	Cre02.g144300.t1.2	NA	K15285 - solute carrier family 35, member E3 (SLC35E3) (1 of 4)									FALSE	TRUE		Cre04.g220600	Cre12.g488100
Cre04.g226138	0.875821	0.395013	1.96498	0.994218	-1.72333	-0.785198	0.622228	2246	Cre04.g226138.t1.1	NA	NA									FALSE	FALSE		Cre17.g734400	Cre01.g004700
Cre16.g686050	0.413093	0.173404	0.829354	0.254945	-1.72333	-0.785197	0.622592	2248	Cre16.g686050.t1.1	NA	PF05277 - Protein of unknown function (DUF726) (DUF726) (1 of 1)									TRUE	FALSE		Cre01.g001950	Cre01.g018150
Cre01.g015300	0.605165	0.109381	1.37397	0.640428	-1.72317	-0.785066	0.686225	2407	Cre01.g015300.t1.1	NA	PTHR10157 - DOPAMINE BETA HYDROXYLASE RELATED (1 of 33)									FALSE	TRUE		Cre01.g030500	Cre16.g675700
Cre12.g489300	34.5056	13.9471	72.7642	31.1399	-1.72224	-0.784282	0.805387	2780	Cre12.g489300.t1.1	NA	KOG1217 - Fibrillins and related proteins containing Ca2+-binding EGF-like domains (1 of 1)									FALSE	TRUE		Cre06.g259650	Cre06.g278177
Cre17.g729000	0.211027	0.0940585	0.412397	0.0611547	-1.72193	-0.784023	0.673886	2362	Cre17.g729000.t1.1	NA	KOG4593 - Mitotic checkpoint protein MAD1 (1 of 5)									FALSE	FALSE		Cre09.g399601	Cre06.g260650
Cre03.g189050	1.69565	0.441241	3.46754	0.359949	-1.72128	-0.783485	0.732619	2514	Cre03.g189050.t1.1	NA	K15538 - glycoprotein endo-alpha-1,2-mannosidase (MANEA) (1 of 1)									FALSE	TRUE		Cre04.g219750	Cre06.g278102
Cre04.g214433	0.330575	0.11828	0.720058	0.176751	-1.72125	-0.78346	0.688457	2416	Cre04.g214433.t1.1	NA	NA									FALSE	TRUE		Cre12.g508700	Cre05.g234640
Cre13.g572900	3.99268	0.621942	9.42736	5.36545	-1.72109	-0.783325	0.786984	2724	Cre13.g572900.t1.1/Cre13.g572900.t2.1	NA	Oligopeptidase A									TRUE	FALSE		Cre17.g735800	Cre01.g052601
Cre14.g608350	0.109562	0.0444445	0.31418	0.259871	-1.72095	-0.783205	0.645788	2309	Cre14.g608350.t1.2	NA	PTHR13339:SF0 - COP9 SIGNALOSOME COMPLEX SUBUNIT 8 (1 of 6)									FALSE	FALSE		Cre05.g242858	Cre13.g591350
Cre13.g589450	9.01979	2.4398	18.9147	10.2151	-1.72075	-0.783036	0.79676	2756	Cre13.g589450.t1.2	NA	PTHR10338:SF110 - VON WILLEBRAND FACTOR A DOMAIN-CONTAINING PROTEIN 5A (1 of 3)									TRUE	FALSE		Cre05.g245900	Cre17.g720600
Cre06.g302050	2.5937	0.366159	5.99999	3.6059	-1.72024	-0.782612	0.807789	2795	Cre06.g302050.t1.2	NA	1,3-beta-D-glucan synthase									FALSE	TRUE		Cre12.g490600	Cre07.g317908
Cre01.g048102	0.786977	0.264661	1.62763	0.440705	-1.7202	-0.782575	0.753503	2599	Cre01.g048102.t1.2	NA	NA									FALSE	TRUE		Cre03.g145167	Cre10.g443801
Cre01.g050600	4.28318	1.50842	9.00022	2.97869	-1.71988	-0.782304	0.822314	2845	Cre01.g050600.t1.1	NA	PTHR13107 - KARYOGAMY PROTEIN KAR4-RELATED (1 of 1)									FALSE	TRUE		Cre12.g485750	Cre07.g351300
Cre10.g460700	4.67733	2.95864	9.73821	5.08737	-1.71963	-0.782101	0.709799	2462	Cre10.g460700.t1.1	NA	PTHR12291:SF23 - PROTEIN MEC-15 (1 of 11)									FALSE	TRUE		Cre04.g213905	Cre24.g755947
Cre02.g095146	10.4201	5.19067	22.8668	11.4827	-1.71957	-0.782044	0.731698	2518	Cre02.g095146.t1.1	NA	NA									FALSE	FALSE		Cre06.g276050	Cre12.g514300
Cre11.g467646	1.86108	0.688434	4.1324	2.18925	-1.71938	-0.781893	0.734707	2526	Cre11.g467646.t1.1	NA	NA									TRUE	FALSE		Cre16.g682026	Cre12.g486600
Cre07.g342150	67.6949	31.5096	133.062	33.0312	-1.71911	-0.781665	0.784498	2718	Cre07.g342150.t1.2	HEM1	Glutamyl-tRNA reductase									TRUE	FALSE		Cre01.g062172	Cre16.g677850
Cre16.g687652	0.0776658	0.0681995	0.18214	0.158068	-1.71821	-0.780905	0.627366	2278	Cre16.g687652.t1.1	NA	NA									FALSE	FALSE		Cre12.g498800	Cre08.g374650
Cre17.g734300	4.02107	1.05612	8.82337	3.99292	-1.7178	-0.780566	0.825119	2871	Cre17.g734300.t1.1/Cre17.g734300.t2.1	NA	PTHR10903:SF47 - TRANSLOCASE OF CHLOROPLAST 120, CHLOROPLASTIC-RELATED (1 of 2)									FALSE	TRUE		Cre08.g365450	Cre13.g584400
Cre16.g658400	11.4231	4.96385	29.2583	23.2031	-1.71712	-0.779993	0.723846	2490	Cre16.g658400.t1.2	FDX2	Ferredoxin									FALSE	FALSE		Cre03.g172200	Cre05.g242550
Cre10.g426650	0.149811	0.182198	0.218634	0.116537	-1.7167	-0.779639	0.627931	2283	Cre10.g426650.t1.1/Cre10.g426650.t2.1	NA	NA									FALSE	FALSE		Cre12.g530900	Cre14.g632900
Cre07.g330150	1.11432	0.735984	2.13557	0.737272	-1.71653	-0.779498	0.679818	2399	Cre07.g330150.t1.1	NA	NA									FALSE	FALSE		Cre02.g141450	Cre13.g562900
Cre02.g086500	3.7737	0.797094	8.39061	3.24854	-1.71581	-0.778893	0.772214	2679	Cre02.g086500.t1.2	NA	PTHR23029//PTHR23029:SF24 - PHOSPHOGLYCERATE MUTASE // SUBFAMILY NOT NAMED (1 of 2)									TRUE	FALSE		Cre02.g085200	Cre13.g578451
Cre11.g480750	0.569784	0.133575	1.1544	0.303434	-1.71555	-0.778675	0.763016	2643	Cre11.g480750.t1.1	NA	3.4.19.5//3.5.1.1 - Asparaginase / L-asparagine amidohydrolase (1 of 1)									FALSE	FALSE		Cre12.g489600	Cre09.g407373
Cre16.g667729	1.06785	0.466933	2.12719	0.333244	-1.71515	-0.778338	0.743312	2577	Cre16.g667729.t1.2/Cre16.g667729.t2.1	NA	NA									FALSE	FALSE		Cre02.g099400	Cre17.g698600
Cre12.g491952	0.00649796	0.0112548	0.0309808	0.0394846	-1.71504	-0.778246	0.626002	2284	Cre12.g491952.t1.1/Cre12.g491952.t2.1	NA	PTHR19297 - GLYCOSYLTRANSFERASE 14 FAMILY MEMBER (1 of 9)									FALSE	FALSE		Cre12.g554528	Cre01.g043650
Cre16.g695600	1.23584	0.553517	2.74094	1.63414	-1.71445	-0.777745	0.737516	2557	Cre16.g695600.t1.2	DNJ10	DnaJ-like protein and Myb-like transcription factor									FALSE	TRUE		Cre18.g748447	Cre13.g561900
Cre13.g587400	0.841561	0.226515	1.71659	0.141921	-1.71392	-0.777298	0.773755	2687	Cre13.g587400.t1.1	NA	NA									FALSE	TRUE		Cre12.g492500	Cre02.g112400
Cre02.g093800	2.77278	0.552087	6.08425	2.58443	-1.71373	-0.777142	0.814835	2829	Cre02.g093800.t1.2/Cre02.g093800.t2.1	NRX3	Nucleoredoxin									TRUE	FALSE		Cre03.g174150	Cre06.g286250
Cre09.g397771	0.775169	0.422202	1.64165	0.750357	-1.7136	-0.777033	0.725621	2505	Cre09.g397771.t1.1	NA	NA									FALSE	TRUE		Cre06.g256550	Cre04.g228350
Cre24.g755497	11.8711	3.44041	29.1476	20.9732	-1.71343	-0.776886	0.797886	2770	Cre24.g755497.t1.1	NA	K05770 - benzodiazapine receptor (BZRP) (1 of 2)									FALSE	TRUE		Cre12.g499200	Cre01.g026300
Cre10.g428525	0.528538	0.196328	1.15393	0.561019	-1.71287	-0.776419	0.631264	2294	Cre10.g428525.t1.1	NA	NA									FALSE	FALSE		Cre16.g651700	Cre16.g688850
Cre09.g416200	3.98352	2.24219	8.50809	3.86079	-1.71253	-0.776129	0.818259	2840	Cre09.g416200.t1.2	MBB1	PsbB mRNA maturation factor, chloroplastic; involved in splicing									TRUE	FALSE		Cre01.g052350	Cre10.g422850
Cre09.g400441	1.17069	0.462607	2.76265	1.79805	-1.71224	-0.775885	0.675422	2397	Cre09.g400441.t1.1	NA	1.14.11.4 - Procollagen-lysine 5-dioxygenase / Procollagen-lysine,2-oxoglutarate 5-dioxygenase (1 of 1)									FALSE	FALSE		Cre01.g048650	Cre11.g467588
Cre03.g190500	17.2366	6.8985	37.0359	17.5258	-1.71223	-0.775875	0.811346	2815	Cre03.g190500.t1.2	GLH1	Glycoside-hydrolase-like protein									FALSE	FALSE		Cre06.g275600	Cre12.g484750
Cre14.g631900	23.3944	4.82805	48.7539	13.4705	-1.71214	-0.775802	0.929972	3545	Cre14.g631900.t1.2	NA	K14648 - poly(U)-specific endoribonuclease (ENDOU, PP11) (1 of 1)									FALSE	FALSE		Cre02.g114900	Cre08.g358600
Cre16.g668100	1.60246	0.481267	3.28313	0.643586	-1.71181	-0.775521	0.723353	2501	Cre16.g668100.t1.2	NA	PTHR22809:SF1 - METHYLTRANSFERASE-LIKE PROTEIN 6 (1 of 1)									FALSE	TRUE		Cre16.g676200	Cre06.g249450
Cre08.g358579	3.88958	1.72371	8.57803	4.31073	-1.71136	-0.775145	0.767839	2667	Cre08.g358579.t1.1	NA	PTHR10984 - ENDOPLASMIC RETICULUM-GOLGI INTERMEDIATE COMPARTMENT PROTEIN (1 of 3)									FALSE	FALSE		Cre14.g610599	Cre12.g483650
Cre11.g482650	3.98569	0.993565	9.64195	6.30566	-1.71105	-0.774882	0.679704	2412	Cre11.g482650.t1.1	NA	NA									TRUE	FALSE		Cre14.g625625	Cre12.g507100
Cre16.g663700	1.13883	0.219559	2.44709	0.893731	-1.71006	-0.774051	0.760892	2640	Cre16.g663700.t1.1	NA	K03871 - von Hippel-Lindau disease tumor supressor (VHL) (1 of 1)									FALSE	FALSE		Cre10.g448600	Cre15.g640350
Cre11.g481126	42.7879	16.8258	86.4278	28.1998	-1.70994	-0.773943	0.79906	2784	Cre11.g481126.t1.1/Cre11.g481126.t2.1	NA	PTHR19370:SF90 - NADH-CYTOCHROME B5 REDUCTASE 2 (1 of 1)									FALSE	FALSE		Cre06.g308350	Cre14.g623950
Cre07.g328400	4.81292	2.97737	10.1664	5.41203	-1.70912	-0.773254	0.756182	2616	Cre07.g328400.t1.2	NA	K13098 - RNA-binding protein FUS (TLS, FUS) (1 of 1)									FALSE	FALSE		Cre03.g200351	Cre14.g619854
Cre06.g277350	4.60262	1.92169	9.43389	2.72563	-1.70912	-0.773252	0.75946	2633	Cre06.g277350.t1.1	NA	K06067 - histone deacetylase 1/2 (HDAC1_2) (1 of 4)									FALSE	TRUE		Cre08.g366150	Cre05.g233650
Cre17.g727650	1.99458	0.965238	4.18348	1.80387	-1.70908	-0.773221	0.667002	2369	Cre17.g727650.t1.1	ATM2	Half-size ABC transporter, membrane protein									FALSE	FALSE		Cre01.g002500	Cre05.g238550
Cre08.g371533	0.208108	0.182743	0.367147	0.185004	-1.70901	-0.773158	0.631178	2298	Cre08.g371533.t1.1	NA	NA									FALSE	FALSE		Cre15.g638304	Cre01.g018100
Cre16.g662300	6.09915	2.36024	12.3745	2.53093	-1.7089	-0.773072	0.825462	2893	Cre16.g662300.t1.2	NA	U6 snRNA-associated Sm-like small nuclear riboprotein LSm3									FALSE	FALSE		Cre02.g099452	Cre09.g393321
Cre08.g375084	11.8747	4.32162	24.7678	8.71047	-1.70888	-0.773051	0.880893	3185	Cre08.g375084.t1.1/Cre08.g375084.t2.1	NA	K12822 - RNA-binding protein 25 (RBM25, S164) (1 of 1)									FALSE	FALSE		Cre02.g147302	Cre17.g707250
Cre06.g303251	0.328958	0.119156	0.697638	0.331219	-1.70881	-0.772995	0.737292	2568	Cre06.g303251.t1.1	NA	NA									FALSE	FALSE		Cre09.g399550	Cre13.g585900
Cre03.g201103	0.774133	0.501262	1.39056	0.168966	-1.70801	-0.772315	0.702436	2469	Cre03.g201103.t1.1	NA	NA									FALSE	TRUE		Cre13.g591851	Cre07.g316200
Cre14.g622075	0.472287	0.0899908	1.00135	0.446729	-1.70775	-0.772093	0.736835	2567	Cre14.g622075.t1.1	NA	NA									FALSE	TRUE		Cre04.g219796	Cre07.g353700
Cre10.g457331	5.75661	1.67942	12.0019	4.02096	-1.70772	-0.772071	0.83232	2924	Cre10.g457331.t1.1	NA	PTHR31600:SF2 - TINY MACROCYSTS PROTEIN B-RELATED (1 of 28)									FALSE	TRUE		Cre12.g513800	Cre07.g345650
Cre16.g691755	0.100742	0.17449	0.45226	0.783337	-1.70724	-0.771665	0.651439	2340	Cre16.g691755.t1.1	NA	NA									FALSE	FALSE		Cre17.g726250	Cre01.g044750
Cre07.g341900	0.116529	0.0680604	0.348617	0.271113	-1.70712	-0.771567	0.631965	2305	Cre07.g341900.t1.1/Cre07.g341900.t2.1	NA	NA									FALSE	FALSE		Cre04.g214700	Cre06.g299500
Cre09.g408900	0.623583	0.135204	1.37269	0.47001	-1.70648	-0.77102	0.635471	2317	Cre09.g408900.t1.2	NA	K11490 - condensin-2 complex subunit H2 (NCAPH2) (1 of 1)									TRUE	FALSE		Cre06.g278214	Cre09.g390000
Cre01.g036300	1.45636	0.371597	3.07544	0.777459	-1.70625	-0.770827	0.856878	3035	Cre01.g036300.t1.1	NA	3.4.19.12 - Ubiquitinyl hydrolase 1 / Ubiquitin thiolesterase (1 of 110)									TRUE	FALSE		Cre09.g408900	Cre09.g406200
Cre08.g368550	1.85968	0.604082	4.26518	2.36098	-1.70571	-0.770374	0.686292	2445	Cre08.g368550.t1.1	NA	PF01753 - MYND finger (zf-MYND) (1 of 96)									FALSE	TRUE		Cre12.g507350	Cre07.g332750
Cre09.g389615	1.72554	0.606768	3.47994	0.384284	-1.70539	-0.770098	0.693613	2459	Cre09.g389615.t1.1	NA	PTHR23083//PTHR23083:SF403 - TETRATRICOPEPTIDE REPEAT PROTEIN, TPR // SUBFAMILY NOT NAMED (1 of 1)									FALSE	TRUE		Cre08.g365900	Cre17.g738050
Cre03.g188100	0.2497	0.0753955	0.558312	0.320657	-1.70492	-0.769701	0.68578	2447	Cre03.g188100.t1.2	NA	NA									FALSE	FALSE		Cre03.g164400	Cre06.g271200
Cre01.g017850	2.94464	0.651331	7.05153	4.40749	-1.70489	-0.769679	0.787916	2758	Cre01.g017850.t1.2	NA	NA									FALSE	FALSE		Cre02.g088800	Cre13.g579650
Cre12.g501700	3.26418	1.69695	6.18992	1.69898	-1.70474	-0.769555	0.740169	2585	Cre12.g501700.t1.1	NA	NA									FALSE	TRUE		Cre13.g569350	Cre07.g318250
Cre02.g077750	115.536	34.1043	231.484	45.6618	-1.70468	-0.7695	0.862795	3076	Cre02.g077750.t1.2	FAP211	Flagellar Associated Protein									FALSE	TRUE		Cre12.g512050	Cre07.g350451
Cre09.g413650	2.13626	0.413947	4.50145	1.53237	-1.70429	-0.769173	0.882051	3219	Cre09.g413650.t1.1	NA	PTHR13520 - RAD50-INTERACTING PROTEIN 1 PROTEIN RINT-1 (1 of 1)									FALSE	FALSE		Cre12.g499550	Cre02.g094650
Cre06.g297400	25.0364	1.58864	54.7937	33.2918	-1.70429	-0.769169	0.820679	2878	Cre06.g297400.t1.1	NA	1.3.1.74 - 2-alkenal reductase (NAD(P)(+)) / NADPH:2-alkenal alpha,beta-hydrogenase (1 of 1)									FALSE	FALSE		Cre06.g262900	Cre02.g105950
Cre01.g016450	1.27406	0.59961	2.69945	1.34931	-1.70418	-0.769077	0.764048	2662	Cre01.g016450.t1.1	NA	PTHR12197 - SET AND MYND DOMAIN CONTAINING (1 of 21)									FALSE	FALSE		Cre03.g178300	Cre12.g533150
Cre01.g022850	0.685146	0.221064	1.43892	0.619777	-1.70396	-0.768894	0.748311	2609	Cre01.g022850.t1.2	NA	NA									FALSE	FALSE		Cre04.g217935	Cre14.g615750
Cre14.g617400	4.4503	0.729204	9.77163	3.0969	-1.70356	-0.76855	0.755242	2632	Cre14.g617400.t1.2	HSP22F	Heat shock protein 22F									TRUE	FALSE		Cre10.g445700	Cre03.g145247
Cre01.g047218	0.0738142	0.0650799	0.179926	0.082233	-1.70345	-0.768458	0.655109	2357	Cre01.g047218.t1.2	NA	PF10184 - Uncharacterized conserved protein (DUF2358) (DUF2358) (1 of 8)									FALSE	FALSE		Cre02.g084250	Cre17.g716800
Cre08.g372550	5.80862	2.33104	12.1571	3.42332	-1.7031	-0.768166	0.833036	2941	Cre08.g372550.t1.1	CDKB1	Plant specific cyclin dependent kinase									FALSE	FALSE		Cre13.g574650	Cre09.g416400
Cre15.g638300	0.936706	0.275421	1.98169	0.503212	-1.70258	-0.767725	0.767204	2691	Cre15.g638300.t1.1	NA	RAP-domain containing protein									FALSE	FALSE		Cre11.g467601	Cre14.g624500
Cre02.g092076	0.333612	0.0788768	0.699804	0.248214	-1.70188	-0.767131	0.70781	2488	Cre02.g092076.t1.1	NA	NA									FALSE	FALSE		Cre06.g276300	Cre02.g146150
Cre13.g569275	0.245846	0.175437	0.492613	0.0367854	-1.70178	-0.767041	0.685655	2452	Cre13.g569275.t1.2	NA	NA									FALSE	FALSE		Cre01.g008950	Cre02.g095115
Cre02.g073200	9.89037	4.64838	20.5626	8.22145	-1.70101	-0.766388	0.839336	2966	Cre02.g073200.t1.2	THD1	Threonine deaminase									TRUE	FALSE		Cre11.g467565	Cre03.g144767
Cre09.g387615	0.171648	0.168482	0.295431	0.108892	-1.70095	-0.766337	0.679533	2439	Cre09.g387615.t1.1	NA	PF10497 - Zinc-finger domain of monoamine-oxidase A repressor R1 (zf-4CXXC_R1) (1 of 3)									FALSE	TRUE		Cre05.g242400	Cre01.g011200
Cre04.g219500	0.767157	0.361106	1.51927	0.371471	-1.70091	-0.766303	0.758291	2646	Cre04.g219500.t1.1	DNJ30	DnaJ-like protein									FALSE	FALSE		Cre06.g301850	Cre03.g206550
Cre06.g297700	0.67366	0.30923	1.32081	0.288136	-1.70057	-0.766018	0.778067	2734	Cre06.g297700.t1.1	NA	PTHR19959 - KINESIN LIGHT CHAIN (1 of 11)									FALSE	FALSE		Cre16.g662250	Cre13.g563926
Cre03.g144424	0.145299	0.0433764	0.353588	0.222802	-1.70054	-0.765989	0.682096	2450	Cre03.g144424.t1.1	NA	PTHR32467:SF15 - AP2-LIKE ETHYLENE-RESPONSIVE TRANSCRIPTION FACTOR SMZ-RELATED (1 of 4)									FALSE	TRUE		Cre06.g284300	Cre13.g589100
Cre04.g220000	1.56343	0.323945	3.34738	1.21424	-1.70006	-0.765582	0.829023	2928	Cre04.g220000.t1.1/Cre04.g220000.t2.1	NA	PTHR23257 - SERINE-THREONINE PROTEIN KINASE (1 of 268)									FALSE	FALSE		Cre16.g678600	Cre12.g499250
Cre12.g536200	0.342321	0.128253	0.685011	0.211062	-1.7	-0.765538	0.672527	2427	Cre12.g536200.t1.1	NA	NA									FALSE	FALSE		Cre08.g366650	Cre05.g237050
Cre08.g376050	0.56804	0.645086	1.05319	0.646727	-1.69939	-0.76502	0.648933	2358	Cre08.g376050.t1.1	NA	PF07366 - SnoaL-like polyketide cyclase (SnoaL) (1 of 2)									FALSE	FALSE		Cre16.g649833	Cre08.g384390
Cre12.g521050	2.43574	1.55002	5.14875	2.82078	-1.69936	-0.764995	0.724639	2547	Cre12.g521050.t1.2	NA	NA									FALSE	TRUE		Cre03.g200319	Cre06.g303600
Cre01.g002451	0.544946	0.274211	1.27175	0.738859	-1.69933	-0.764966	0.69318	2471	Cre01.g002451.t1.1	NA	PTHR10774 - EXTENDED SYNAPTOTAGMIN-RELATED (1 of 18)									FALSE	FALSE		Cre01.g036300	Cre06.g304250
Cre02.g097213	0.725581	0.0951986	1.51333	0.725863	-1.69926	-0.764903	0.729921	2569	Cre02.g097213.t1.2	NA	PF00530 - Scavenger receptor cysteine-rich domain (SRCR) (1 of 37)									FALSE	TRUE		Cre14.g631000	Cre03.g198850
Cre16.g680454	4.04742	1.00801	8.26637	2.23824	-1.69909	-0.764765	0.848141	3018	Cre16.g680454.t1.1	NA	PF13417 - Glutathione S-transferase, N-terminal domain (GST_N_3) (1 of 8)									TRUE	FALSE		Cre04.g225900	Cre17.g746247
Cre12.g503250	2.06102	1.34877	3.83767	1.13721	-1.69892	-0.764616	0.768147	2707	Cre12.g503250.t1.2	NA	NA									FALSE	FALSE		Cre02.g076663	Cre03.g162550
Cre01.g008200	0.837202	0.192186	1.83188	0.868853	-1.69829	-0.764081	0.719384	2523	Cre01.g008200.t1.1	NA	NA									FALSE	TRUE		Cre15.g640101	Cre10.g446400
Cre01.g051137	0.505793	0.584511	0.952204	0.41624	-1.6979	-0.763754	0.637533	2336	Cre01.g051137.t1.1	NA	NA									FALSE	FALSE		Cre12.g548577	Cre11.g467791
Cre12.g532650	0.731755	0.32663	1.44535	0.352522	-1.69788	-0.763737	0.763164	2680	Cre12.g532650.t1.2	NA	NA									FALSE	FALSE		Cre07.g344668	Cre05.g240533
Cre02.g144005	0.559384	0.204801	1.62187	1.12837	-1.69703	-0.763015	0.66172	2392	Cre02.g144005.t1.1	NA	2.3.1.43 - Phosphatidylcholine--sterol O-acyltransferase / Phospholipid--cholesterol acyltransferase (1 of 5)									FALSE	FALSE		Cre07.g353550	Cre10.g433300
Cre17.g704150	1.15001	0.957474	2.05792	0.416938	-1.69665	-0.762685	0.712509	2516	Cre17.g704150.t1.1	GDP5	Glycerophosphoryl diester phosphodiesterase family protein									FALSE	TRUE		Cre13.g563950	Cre16.g672600
Cre03.g159581	0.208616	0.274177	0.341728	0.183472	-1.69603	-0.762161	0.6611	2390	Cre03.g159581.t1.2/Cre03.g159581.t2.1	NA	PF02536 - mTERF (mTERF) (1 of 13)									FALSE	FALSE		Cre01.g032900	Cre03.g189550
Cre02.g141706	3.14381	1.76639	6.18358	1.67069	-1.696	-0.762133	0.729658	2572	Cre02.g141706.t1.1/Cre02.g141706.t2.1	NA	K03595 - GTP-binding protein Era (era) (1 of 1)									FALSE	FALSE		Cre09.g416200	Cre07.g332275
Cre13.g562501	4.17222	1.85453	8.44389	2.1935	-1.6957	-0.761885	0.825364	2919	Cre13.g562501.t1.1	NA	2.7.9.3 - Selenide, water dikinase / Selenophosphate synthetase (1 of 1)									FALSE	TRUE		Cre16.g651200	Cre10.g429650
Cre06.g289850	9.02204	1.92955	19.3795	7.67673	-1.69541	-0.761634	0.918408	3483	Cre06.g289850.t1.1	SBE1	Starch Branching Enzyme									TRUE	FALSE		Cre03.g182650	Cre06.g257400
Cre11.g479300	1.96567	0.854511	4.26799	2.24302	-1.69491	-0.76121	0.802669	2828	Cre11.g479300.t1.1/Cre11.g479300.t2.1	NA	K15083 - DNA repair protein RAD16 (RAD16) (1 of 1)									FALSE	FALSE		Cre03.g200450	Cre04.g217925
Cre12.g502500	1.39241	0.181295	2.99634	1.0719	-1.69473	-0.761057	0.764857	2692	Cre12.g502500.t1.2	NA	2.4.2.41 - Xylogalacturonan beta-1,3-xylosyltransferase / Xylogalacturonan xylosyltransferase (1 of 33)									FALSE	TRUE		Cre17.g739050	Cre16.g650400
Cre08.g368450	12.0556	6.26311	24.135	7.71622	-1.69377	-0.760235	0.85846	3078	Cre08.g368450.t1.2/Cre08.g368450.t2.1	NA	K12667 - oligosaccharyltransferase complex subunit delta (ribophorin II) (SWP1, RPN2) (1 of 1)									FALSE	FALSE		Cre06.g261850	Cre13.g568200
Cre11.g479200	1.26566	0.597858	2.62642	0.917589	-1.69361	-0.760103	0.80858	2853	Cre11.g479200.t1.1	NA	PF00995 - Sec1 family (Sec1) (1 of 5)									FALSE	FALSE		Cre06.g274500	Cre03.g206950
Cre06.g278166	0.130273	0.0772101	0.275565	0.128477	-1.69301	-0.759592	0.670016	2435	Cre06.g278166.t1.1	PRL4	Predicted extracellular protein									FALSE	FALSE		Cre07.g345700	Cre01.g054550
Cre05.g243950	5.07982	1.85668	10.1191	2.17098	-1.6928	-0.759413	0.799709	2819	Cre05.g243950.t1.2	NA	NA									FALSE	TRUE		Cre12.g548700	Cre09.g411050
Cre01.g034350	4.41187	0.706184	9.68624	4.29325	-1.69256	-0.759206	0.828901	2945	Cre01.g034350.t1.1	NA	PTHR10641:SF585 - MYB DNA-BINDING-LIKE PROTEIN (1 of 2)									FALSE	FALSE		Cre04.g228950	Cre07.g350050
Cre10.g445150	1.7238	0.234678	3.51846	1.22613	-1.69233	-0.759009	0.788965	2796	Cre10.g445150.t1.1	NA	PF01612//PF04073 - 3-5 exonuclease (DNA_pol_A_exo1) // Aminoacyl-tRNA editing domain (tRNA_edit) (1 of 1)									FALSE	TRUE		Cre16.g689250	Cre06.g278221
Cre06.g279050	0.151021	0.0920758	0.586246	0.760039	-1.69156	-0.758356	0.648629	2375	Cre06.g279050.t1.2	NA	PTHR11584:SF381 - PROTEIN PQN-80, ISOFORM B (1 of 7)									FALSE	FALSE		Cre08.g373365	Cre06.g278451
Cre09.g396028	0.464156	0.0394391	1.05884	0.488647	-1.69125	-0.758091	0.726509	2574	Cre09.g396028.t1.1	NA	NA									FALSE	TRUE		Cre03.g180300	Cre14.g615800
Cre16.g687000	1.07925	0.538042	2.0951	0.358103	-1.69034	-0.757313	0.803956	2838	Cre16.g687000.t1.1	NA	K14685 - solute carrier family 40 (iron-regulated transporter), member 1 (SLC40A1, FPN1) (1 of 1)									FALSE	TRUE		Cre01.g039800	Cre07.g332084
Cre02.g090451	0.293256	0.0561336	0.607636	0.163894	-1.69012	-0.757128	0.740765	2610	Cre02.g090451.t1.1	NA	NA									FALSE	FALSE		Cre02.g076650	Cre07.g319001
Cre16.g678600	4.13989	1.1764	8.55492	3.02397	-1.68973	-0.756789	0.766994	2715	Cre16.g678600.t1.2	NA	PTHR20961:SF0 - EGF DOMAIN-SPECIFIC O-LINKED N-ACETYLGLUCOSAMINE TRANSFERASE (1 of 3)									TRUE	FALSE		Cre07.g356050	Cre09.g386912
Cre03.g183100	18.7035	8.67815	39.5464	18.1248	-1.68965	-0.756723	0.78422	2776	Cre03.g183100.t1.2	TIM22B	Mitochondrial inner membrane translocase									FALSE	FALSE		Cre13.g575701	Cre12.g515550
Cre13.g587450	3.78363	0.420453	7.72926	1.47751	-1.68831	-0.755578	0.794549	2807	Cre13.g587450.t1.2	FCL2	Predicted 5-formyltetrahydrofolate cycloligase									FALSE	FALSE		Cre16.g659400	Cre13.g582250
Cre03.g164950	6.0239	2.42874	11.7725	0.704195	-1.68813	-0.755426	0.68027	2464	Cre03.g164950.t1.1	NA	PTHR15481 - RIBONUCLEIC ACID BINDING PROTEIN S1 (1 of 1)									TRUE	FALSE		Cre10.g429600	Cre06.g305251
Cre16.g665400	29.0612	13.5265	58.7136	19.446	-1.68788	-0.755216	0.896541	3347	Cre16.g665400.t1.2	NA	Small nuclear ribonucleoprotein SmD1									FALSE	FALSE		Cre12.g487800	Cre12.g496100
Cre16.g673953	0.990036	0.0161235	2.07467	0.72019	-1.68765	-0.755018	0.720715	2565	Cre16.g673953.t1.1	NA	Peptidyl-prolyl cis-trans isomerase, FKBP-type									TRUE	FALSE		Cre06.g278242	Cre17.g724550
Cre06.g266383	1.31875	0.661945	2.49784	0.383212	-1.68521	-0.752929	0.745455	2636	Cre06.g266383.t1.1	NA	PTHR18934:SF145 - ATP-DEPENDENT RNA HELICASE DHX57-RELATED (1 of 3)									FALSE	FALSE		Cre17.g715750	Cre03.g201100
Cre17.g697800	1.15402	0.358379	2.3223	0.687726	-1.68454	-0.752354	0.63921	2359	Cre17.g697800.t1.2	NA	NA									TRUE	FALSE		Cre02.g078939	Cre03.g201327
Cre04.g233202	2.76063	0.48932	5.81957	1.93824	-1.68431	-0.752153	0.83738	2988	Cre04.g233202.t1.1	NA	PF04577 - Protein of unknown function (DUF563) (DUF563) (1 of 14)									FALSE	TRUE		Cre50.g761497	Cre15.g634600
Cre13.g585950	1.55783	0.245338	3.21149	1.00024	-1.68324	-0.75124	0.783066	2786	Cre13.g585950.t1.2	NA	NA									FALSE	TRUE		Cre08.g365692	Cre03.g144707
Cre12.g556950	0.587127	0.221707	1.34374	0.800649	-1.68274	-0.750813	0.741547	2627	Cre12.g556950.t1.2	NA	NA									FALSE	TRUE		Cre12.g506050	Cre12.g507750
Cre06.g293700	9.80318	5.82055	20.056	8.55628	-1.68229	-0.750428	0.807572	2874	Cre06.g293700.t1.2	MRPL7	Mitochondrial ribosomal protein L7/L12									FALSE	FALSE		Cre06.g269450	Cre12.g532250
Cre12.g541800	1.94367	0.884575	3.8421	1.20001	-1.68203	-0.750204	0.838196	2997	Cre12.g541800.t1.2	NA	3.4.21.26 - Prolyl oligopeptidase / Prolyl endopeptidase (1 of 2)									TRUE	FALSE		Cre09.g406625	Cre14.g610450
Cre12.g495800	1.7283	0.557365	3.53436	1.04032	-1.68153	-0.749778	0.872382	3198	Cre12.g495800.t1.1	NA	PTHR18937 - STRUCTURAL MAINTENANCE OF CHROMOSOMES SMC FAMILY MEMBER (1 of 36)									TRUE	FALSE		Cre09.g399178	Cre13.g605600
Cre01.g026250	3.68576	2.80226	7.05556	3.4541	-1.68112	-0.749419	0.746683	2645	Cre01.g026250.t1.2	AGA1	Alpha-galactosidase									FALSE	TRUE		Cre07.g312650	Cre06.g292050
Cre10.g456150	2.01235	0.615916	4.50548	1.85217	-1.68103	-0.749342	0.778999	2773	Cre10.g456150.t1.2	NA	PTHR10992:SF701 - SERINE HYDROLASE-RELATED (1 of 1)									FALSE	TRUE		Cre10.g421600	Cre07.g314800
Cre16.g684505	0.918536	0.226253	1.95575	0.742567	-1.68069	-0.74905	0.739852	2628	Cre16.g684505.t1.1	NA	NA									FALSE	FALSE		Cre13.g572900	Cre16.g650425
Cre07.g356150	1.72293	0.803311	3.44472	0.92209	-1.6801	-0.748551	0.745186	2644	Cre07.g356150.t1.2	NA	3.4.24.84 - Ste24 endopeptidase / Prenyl protein-specific endoprotease 1 (1 of 1)									FALSE	FALSE		Cre01.g016200	Cre08.g371500
Cre09.g410200	1.25709	0.478804	2.53529	0.377721	-1.67989	-0.74837	0.834536	2986	Cre09.g410200.t1.2	NA	NA									FALSE	TRUE		Cre17.g718200	Cre16.g674515
Cre09.g402750	2.67985	1.36269	5.17106	2.1536	-1.67968	-0.748184	0.807821	2881	Cre09.g402750.t1.2	COG2	Component of oligomeric golgi complex									TRUE	FALSE		Cre16.g650250	Cre08.g375950
Cre03.g201450	1.51233	0.366274	3.19178	1.11707	-1.67925	-0.747815	0.812891	2907	Cre03.g201450.t1.1	NA	PTHR12203:SF13 - F10K1.7 PROTEIN (1 of 33)									FALSE	TRUE		Cre12.g484150	Cre02.g079850
Cre05.g240225	0.962337	0.0831313	1.99211	0.638709	-1.67918	-0.747758	0.822757	2942	Cre05.g240225.t1.1/Cre05.g240225.t2.1	NA	PF05572 - Pregnancy-associated plasma protein-A (Peptidase_M43) (1 of 5)									FALSE	TRUE		Cre12.g544114	Cre17.g731200
Cre15.g635998	1.09487	0.457994	2.28624	0.86034	-1.67908	-0.74767	0.789642	2810	Cre15.g635998.t1.1	NA	PTHR12393:SF6 - SPHINGOMYELIN PHOSPHODIESTERASE 2 (1 of 100)									FALSE	FALSE		Cre12.g515250	Cre12.g559050
Cre09.g400812	1.04405	0.159143	2.25631	0.915457	-1.67906	-0.747653	0.832402	2979	Cre09.g400812.t1.1	NA	PF12325 - TATA element modulatory factor 1 TATA binding (TMF_TATA_bd) (1 of 2)									FALSE	FALSE		Cre06.g251450	Cre12.g549850
Cre17.g737300	0.858031	0.204872	2.04519	1.29491	-1.67843	-0.74711	0.682533	2480	Cre17.g737300.t1.1	NA	KOG4726 - Ultrahigh sulfur keratin-associated protein (1 of 3)									FALSE	FALSE		Cre03.g154600	Cre04.g217909
Cre12.g532151	0.110841	0.039933	0.229273	0.0267408	-1.67813	-0.746858	0.740406	2630	Cre12.g532151.t1.1	NA	PTHR13018:SF5 - PHOSPHATE METABOLISM PROTEIN 7 (1 of 12)									FALSE	FALSE		Cre03.g167850	Cre09.g413850
Cre12.g492851	0.0114256	0.0197898	0.0559746	0.0713387	-1.67727	-0.746118	0.642232	2393	Cre12.g492851.t1.1	NA	K19355 - mannan endo-1,4-beta-mannosidase (MAN) (1 of 4)									FALSE	FALSE		Cre01.g003541	Cre13.g573900
Cre12.g527950	1.5301	0.463633	3.02922	0.676397	-1.67679	-0.745703	0.763455	2717	Cre12.g527950.t1.1	NA	2.4.1.227 - Undecaprenyldiphospho-muramoylpentapeptide beta-N- acetylglucosaminyltransferase / Undecaprenyl-PP-MurNAc-pentapeptide-UDPGlcNAc GlcNAc transferase (1 of 1)									FALSE	FALSE		Cre11.g467500	Cre06.g251250
Cre06.g303350	1.85035	0.790067	3.73351	1.67258	-1.67662	-0.745556	0.752646	2669	Cre06.g303350.t1.2	NA	Similar to Flagellar Associated Protein FAP16									FALSE	TRUE		Cre16.g691353	Cre02.g147100
Cre06.g278126	1.4687	0.335653	3.32021	1.82981	-1.6762	-0.745194	0.80671	2883	Cre06.g278126.t1.1	NA	NA									FALSE	FALSE		Cre17.g731800	Cre08.g376650
Cre08.g373450	10.2158	1.72168	22.1258	10.3054	-1.67617	-0.745169	0.934983	3717	Cre08.g373450.t1.1	NA	3.2.1.141 - 4-alpha-D-((1->4)-alpha-D-glucano)trehalose trehalohydrolase / Maltooligosyl trehalose trehalohydrolase (1 of 1)									FALSE	TRUE		Cre16.g650300	Cre12.g511050
Cre10.g461850	1.17108	0.122247	2.59432	1.22922	-1.67612	-0.745127	0.850462	3073	Cre10.g461850.t1.1	NA	NA									TRUE	FALSE		Cre16.g683300	Cre01.g002950
Cre06.g293450	0	0	0.0469811	0.0813736	-1.67609	-0.745098	0.642533	2400	Cre06.g293450.t1.2/Cre06.g293450.t2.1	NA	NA									FALSE	FALSE		Cre13.g568750	Cre03.g175926
Cre17.g698900	0	0	0.0703536	0.121856	-1.67609	-0.745098	0.642549	2401	Cre17.g698900.t1.1	NA	PTHR13078:SF53 - PROTEIN MAOC-1 (1 of 32)									TRUE	FALSE		Cre16.g672385	Cre02.g143327
Cre16.g673950	0	0	0.0358157	0.0620346	-1.67609	-0.745098	0.642587	2403	Cre16.g673950.t1.2	NA	2.6.1.80 - Nicotianamine aminotransferase / Nicotianamine transaminase (1 of 1)									FALSE	FALSE		Cre12.g559750	Cre09.g402478
Cre01.g019400	0	0	0.13183	0.228337	-1.67609	-0.745098	0.644435	2405	Cre01.g019400.t1.2	NA	NA									FALSE	FALSE		Cre02.g141386	Cre07.g332650
Cre21.g752747	0	0	0.145082	0.251289	-1.67609	-0.745098	0.645146	2408	Cre21.g752747.t1.1	NA	NA									FALSE	FALSE		Cre08.g372250	Cre10.g465450
Cre03.g177300	0	0	0.0745097	0.129055	-1.67609	-0.745098	0.648633	2414	Cre03.g177300.t1.2	NA	Haloperoxidase-like protein									TRUE	FALSE		Cre16.g665250	Cre04.g232202
Cre03.g191100	0.20313	0.101352	0.412709	0.104784	-1.67574	-0.744799	0.7197	2583	Cre03.g191100.t1.2	NA	PF15016 - Domain of unknown function (DUF4520) (DUF4520) (1 of 1)									TRUE	FALSE		Cre04.g219800	Cre13.g591000
Cre06.g278147	2.84275	1.0234	5.51462	1.70474	-1.67547	-0.74457	0.693437	2519	Cre06.g278147.t1.1	NA	NA									FALSE	FALSE		Cre07.g318950	Cre02.g079800
Cre03.g185100	2.75673	1.6566	5.08353	0.821402	-1.67492	-0.744088	0.815571	2921	Cre03.g185100.t1.1	NA	K15698 - RING finger protein 121 (RNF121) (1 of 1)									TRUE	FALSE		Cre06.g278210	Cre10.g462816
Cre02.g086150	0.731595	0.152963	1.46183	0.189375	-1.67393	-0.743236	0.851015	3081	Cre02.g086150.t1.2	NA	NA									TRUE	FALSE		Cre14.g634279	Cre14.g633850
Cre12.g517550	4.77806	1.25364	9.9112	2.89168	-1.67354	-0.742905	0.865464	3172	Cre12.g517550.t1.1	NA	2.1.1.137 - Arsenite methyltransferase / S-adenosyl-L-methionine:methylarsonite As-methyltransferase (1 of 2)									FALSE	FALSE		Cre01.g027800	Cre01.g052750
Cre06.g297900	0.392774	0.201391	0.740446	0.257034	-1.67354	-0.742902	0.733782	2625	Cre06.g297900.t1.1	NA	PTHR11266//PTHR11266:SF42 - PEROXISOMAL MEMBRANE PROTEIN 2, PXMP2 MPV17 // SUBFAMILY NOT NAMED (1 of 4)									FALSE	FALSE		Cre03.g174525	Cre13.g590905
Cre03.g182500	4.90991	2.67242	9.52876	3.02678	-1.67316	-0.742579	0.792988	2837	Cre03.g182500.t1.2	SRP72	Subunit of the Signal Recognition Particle									FALSE	FALSE		Cre07.g333350	Cre03.g144011
Cre03.g155700	0.370107	0.0936218	0.809993	0.38981	-1.67296	-0.742407	0.748575	2663	Cre03.g155700.t1.1	NA	PTHR22840:SF12 - WD REPEAT-CONTAINING PROTEIN 36 (1 of 2)									TRUE	FALSE		Cre09.g398845	Cre05.g241635
Cre01.g033300	4.08624	1.03447	7.94798	0.61977	-1.67174	-0.741354	0.658693	2448	Cre01.g033300.t1.2/Cre01.g033300.t2.1	NA	PF13668 - Ferritin-like domain (Ferritin_2) (1 of 1)									TRUE	FALSE		Cre03.g199550	Cre10.g434800
Cre06.g300750	7.05087	3.77852	13.9608	5.5324	-1.67117	-0.740857	0.873879	3240	Cre06.g300750.t1.1	NA	K12874 - intron-binding protein aquarius (AQR) (1 of 1)									FALSE	FALSE		Cre04.g217050	Cre02.g113450
Cre07.g348650	2.99263	0.994086	6.15477	2.02658	-1.67097	-0.740685	0.819808	2949	Cre07.g348650.t1.2	NA	4.6.1.1//4.6.1.2 - Adenylate cyclase / ATP pyrophosphate-lyase // Guanylate cyclase / Guanylyl cyclase (1 of 8)									FALSE	TRUE		Cre06.g278203	Cre04.g217945
Cre12.g551050	3.66292	0.552284	7.29146	1.52347	-1.67037	-0.74017	0.830473	2985	Cre12.g551050.t1.2	NA	3.4.22.69 - SARS coronavirus main proteinase / Severe acute respiratory syndrome coronavirus main protease (1 of 4)									FALSE	TRUE		Cre08.g361063	Cre01.g039150
Cre11.g467663	2.92473	0.652091	6.05952	2.02838	-1.67029	-0.7401	0.896023	3376	Cre11.g467663.t1.1	NA	PF01833//PF10162 - IPT/TIG domain (TIG) // G8 domain (G8) (1 of 2)									FALSE	TRUE		Cre02.g100250	Cre06.g304700
Cre12.g501750	0.530019	0.405478	0.899366	0.0356727	-1.66988	-0.739744	0.721441	2597	Cre12.g501750.t1.1	NA	NA									FALSE	FALSE		Cre12.g522200	Cre03.g145367
Cre06.g278090	1.32044	0.689667	2.64259	1.25893	-1.66984	-0.739706	0.750902	2677	Cre06.g278090.t1.1	MRPL1	Mitochondrial ribosomal protein L1									FALSE	FALSE		Cre01.g048400	Cre07.g341150
Cre12.g550300	0.00753236	0.0130464	0.034746	0.0601818	-1.66964	-0.739536	0.648457	2432	Cre12.g550300.t1.1/Cre12.g550300.t2.1	NA	PTHR24361:SF276 - PROTEIN KINASE (1 of 1)									FALSE	FALSE		Cre12.g508900	Cre07.g354200
Cre03.g143927	2.28455	0.560793	4.77878	1.57422	-1.66949	-0.739409	0.869619	3214	Cre03.g143927.t1.1	NA	NA									FALSE	TRUE		Cre06.g292900	Cre08.g363874
Cre03.g191700	0.909072	0.555009	1.71969	0.487175	-1.66899	-0.738977	0.763119	2733	Cre03.g191700.t1.1	NA	NA									FALSE	FALSE		Cre12.g527500	Cre06.g278104
Cre02.g096400	0.200497	0.068822	0.720252	0.763878	-1.66896	-0.738951	0.655547	2449	Cre02.g096400.t1.2	NA	K18164 - NADH dehydrogenase [ubiquinone] 1 alpha subcomplex assembly factor 7 (NDUFAF7) (1 of 1)									FALSE	TRUE		Cre01.g034750	Cre04.g230438
Cre10.g423700	1.21737	0.140189	2.62476	0.824817	-1.66855	-0.738591	0.685929	2511	Cre10.g423700.t1.1	NA	PF07985 - SRR1 (SRR1) (1 of 1)									FALSE	TRUE		Cre08.g367100	Cre16.g661800
Cre08.g369050	0.0702633	0.0608666	0.189877	0.0867812	-1.66839	-0.73846	0.660022	2455	Cre08.g369050.t1.2	NA	NA									FALSE	FALSE		Cre09.g401850	Cre06.g290800
Cre02.g095049	2.08613	0.547049	4.50541	1.88869	-1.66823	-0.738317	0.75074	2684	Cre02.g095049.t1.1	NA	NA									FALSE	TRUE		Cre01.g032250	Cre05.g233450
Cre12.g561601	0.773749	0.202902	1.97216	1.48946	-1.66802	-0.738139	0.687493	2520	Cre12.g561601.t1.2	NA	NA									FALSE	FALSE		Cre01.g047001	Cre16.g665450
Cre12.g493700	0.274511	0.0719854	0.582986	0.176186	-1.66791	-0.738045	0.763446	2735	Cre12.g493700.t1.2	NA	PF01494//PF13450 - FAD binding domain (FAD_binding_3) // NAD(P)-binding Rossmann-like domain (NAD_binding_8) (1 of 3)									FALSE	TRUE		Cre12.g559150	Cre12.g495850
Cre03.g154700	2.6468	0.667557	5.28006	1.65057	-1.66786	-0.737999	0.783299	2812	Cre03.g154700.t1.1	NA	KOG3870 - Uncharacterized conserved protein (1 of 1)									FALSE	TRUE		Cre01.g039450	Cre04.g220900
Cre03.g206203	1.26873	0.47884	2.65131	1.16336	-1.66774	-0.737896	0.796954	2872	Cre03.g206203.t1.1/Cre03.g206203.t2.1	NA	NA									FALSE	FALSE		Cre01.g026700	Cre05.g243950
Cre02.g110263	0.17801	0.216493	0.302362	0.310071	-1.66641	-0.736741	0.647133	2438	Cre02.g110263.t1.1/Cre02.g110263.t2.1/Cre02.g110263.t3.1	NA	PTHR15535 - TRANSMEMBRANE PROTEIN 2-RELATED (1 of 88)									FALSE	FALSE		Cre12.g502200	Cre13.g564350
Cre09.g408550	2.32356	1.44548	4.33536	0.948402	-1.66573	-0.736151	0.80049	2891	Cre09.g408550.t1.2	NA	K10684 - ubiquitin-like 1-activating enzyme E1 A (UBLE1A, SAE1) (1 of 1)									FALSE	FALSE		Cre03.g182600	Cre14.g612200
Cre01.g022666	3.52727	0.974705	6.90682	0.639335	-1.66568	-0.73611	0.792783	2859	Cre01.g022666.t1.1	NA	NA									FALSE	TRUE		Cre13.g579950	Cre10.g455800
Cre06.g296200	2.63919	0.788078	5.5534	2.03981	-1.66566	-0.736096	0.774092	2793	Cre06.g296200.t1.2	NA	PTHR24349//PTHR24349:SF121 - SERINE/THREONINE-PROTEIN KINASE // SUBFAMILY NOT NAMED (1 of 3)									FALSE	TRUE		Cre02.g142907	Cre03.g191350
Cre13.g604650	51.617	20.485	104.891	40.4918	-1.66543	-0.735894	0.890168	3345	Cre13.g604650.t1.2/Cre13.g604650.t2.1	NA	PTHR10804:SF11 - PROLIFERATION-ASSOCIATED PROTEIN 2G4 (1 of 1)									FALSE	FALSE		Cre03.g155350	Cre10.g433866
Cre13.g561950	0.419436	0.204132	0.877302	0.37528	-1.66536	-0.735837	0.755758	2710	Cre13.g561950.t1.2	NA	PTHR13078:SF22 - MAOC-LIKE DEHYDRATASE DOMAIN-CONTAINING PROTEIN (1 of 14)									TRUE	FALSE		Cre03.g208100	Cre09.g397882
Cre07.g350500	5.02709	0.378697	10.1777	2.84033	-1.66458	-0.735161	0.879076	3293	Cre07.g350500.t1.2	NA	6.1.1.9 - Valine--tRNA ligase / Valyl-tRNA synthetase (1 of 2)									FALSE	FALSE		Cre17.g716451	Cre07.g354450
Cre14.g626750	3.3243	1.32948	6.97639	2.83204	-1.66413	-0.73477	0.78834	2839	Cre14.g626750.t1.2	NA	PTHR14154:SF5 - EARLY LIGHT-INDUCED PROTEIN 1, CHLOROPLASTIC-RELATED (1 of 6)									TRUE	FALSE		Cre09.g399916	Cre01.g009000
Cre02.g095054	1.53915	0.310066	2.99511	0.294922	-1.6637	-0.734392	0.762365	2737	Cre02.g095054.t1.1/Cre02.g095054.t2.1/Cre02.g095054.t3.1	NA	NA									FALSE	TRUE		Cre06.g282651	Cre01.g055453
Cre12.g514300	4.81047	0.655123	9.43183	1.5912	-1.66267	-0.733504	0.865765	3208	Cre12.g514300.t1.2	NA	K04710 - ceramide synthetase (CERS) (1 of 6)									FALSE	TRUE		Cre21.g752647	Cre12.g555700
Cre12.g507900	0.0993014	0.0563888	0.192964	0.0257964	-1.66227	-0.733156	0.668156	2479	Cre12.g507900.t1.1	NA	NA									FALSE	FALSE		Cre16.g677750	Cre07.g344500
Cre03.g179050	1.22708	0.447429	2.73494	1.64269	-1.66183	-0.732774	0.782086	2820	Cre03.g179050.t1.2	NA	NA									FALSE	FALSE		Cre16.g694250	Cre03.g205450
Cre01.g021450	4.94357	1.79921	9.79629	3.04726	-1.6612	-0.732224	0.90832	3481	Cre01.g021450.t1.1/Cre01.g021450.t2.1/Cre01.g021450.t3.1	NA	PTHR23083//PTHR23083:SF443 - TETRATRICOPEPTIDE REPEAT PROTEIN, TPR // SUBFAMILY NOT NAMED (1 of 1)									TRUE	FALSE		Cre16.g685700	Cre03.g196651
Cre12.g541450	15.8007	6.55468	35.7585	22.8324	-1.66118	-0.732211	0.784986	2833	Cre12.g541450.t1.2	NA	NA									FALSE	TRUE		Cre03.g174076	Cre07.g331150
Cre07.g312150	1.40143	0.408389	2.8742	1.10063	-1.66104	-0.732089	0.852062	3118	Cre07.g312150.t1.1	NA	PF00580//PF13361 - UvrD/REP helicase N-terminal domain (UvrD-helicase) // UvrD-like helicase C-terminal domain (UvrD_C) (1 of 1)									FALSE	TRUE		Cre04.g229750	Cre16.g669650
Cre16.g686286	0.309605	0.14823	0.860634	0.844195	-1.66092	-0.731981	0.668496	2481	Cre16.g686286.t1.1	NA	NA									FALSE	FALSE		Cre12.g528614	Cre08.g384000
Cre06.g259950	0.424122	0.107697	0.940443	0.421261	-1.66088	-0.731952	0.742836	2668	Cre06.g259950.t1.1/Cre06.g259950.t2.1	NA	NA									FALSE	FALSE		Cre16.g685628	Cre14.g624201
Cre17.g696850	21.8793	2.99662	44.8876	13.5753	-1.65992	-0.731117	0.905446	3458	Cre17.g696850.t1.2	NA	K17279 - receptor expression-enhancing protein 5/6 (REEP5_6) (1 of 2)									FALSE	TRUE		Cre08.g378650	Cre03.g146227
Cre12.g507909	1.02	0.0990909	2.07005	0.427892	-1.65988	-0.731082	0.907774	3479	Cre12.g507909.t1.2	NA	NA									FALSE	FALSE		Cre02.g092950	Cre07.g325727
Cre04.g213761	1.45194	0.187402	3.05941	0.823234	-1.65987	-0.731068	0.742811	2671	Cre04.g213761.t1.1/Cre04.g213761.t2.1	NA	PTHR31793:SF5 - THIOESTERASE-LIKE PROTEIN (1 of 1)									FALSE	TRUE		Cre06.g280350	Cre05.g245100
Cre04.g218450	2.66764	0.611241	5.45241	3.32476	-1.65986	-0.731063	0.778576	2813	Cre04.g218450.t1.2	NA	NA									FALSE	TRUE		Cre06.g261800	Cre01.g008800
Cre02.g088050	1.47898	0.605679	2.89595	0.523671	-1.65984	-0.731043	0.78698	2842	Cre02.g088050.t1.2	NA	K03539 - ribonuclease P/MRP protein subunit RPP1 (RPP1, RPP30) (1 of 1)									FALSE	TRUE		Cre12.g531600	Cre11.g467658
Cre03.g202450	1.94798	0.857261	3.80431	1.44852	-1.65966	-0.730888	0.832964	3033	Cre03.g202450.t1.1	NA	NA									TRUE	FALSE		Cre08.g359051	Cre16.g684350
Cre13.g588150	3.04616	0.311218	6.17053	1.10652	-1.65954	-0.730783	0.790136	2864	Cre13.g588150.t1.2	NA	K14190 - GDP-L-galactose phosphorylase (VTC2_5) (1 of 1)									TRUE	FALSE		Cre16.g650800	Cre13.g568250
Cre06.g269050	3.69833	0.364088	7.50481	1.74923	-1.65948	-0.73073	0.828271	3008	Cre06.g269050.t1.2	NA	PTHR14194:SF71 - PRESTALK A DIFFERENTIATION PROTEIN A (1 of 2)									FALSE	FALSE		Cre06.g287750	Cre16.g680400
[truncated: 14,027 more rows]
